# Supplementary material
Source: HighWire-hosted journal article supplement (doi:10.1101/rna.080864.125)
Supplement: Supplemental_File2.xlsx [file Supplemental_File2.xlsx]

## Sheet: Final training data
locus	locus_length	log_shap_p	auc	strand_bias	perc_GC	ave_size	perc_first_nucT	perc_A10	highest_si_col	si_dicerz	num_si_dicer_reads	hp_perc_paired	hp_phasedz	hp_mfe	hp_dicerz	mi_perc_paired	mirna_dicerz	mirna_mfe	mirna_overlapz	pingpong_col	max_pi_count	max_piz_overlap	pi_phasedz	pi_phased26z	unique_read_bias	type	species	library_size	dataset
chr2L-12036017_12036142	126	-4.94039	0.96302	0.625	0.343373	21	0.5	0.333333	21	-0.471405	0	0.608	2.50172	-21.9	-33	0.511628	-33	-10.8	-33	21	166667	19	0.755824	-33	0.916667	cisnat	dmel	9708709	dcr2het_rep1
chr2L-20650762_20650881	120	-3.82744	0.991438	0.568182	0.284545	21	0.522727	0.340909	21	0.0606061	45454.6	0.588235	2.14735	-13.5	-33	0.558824	2.66667	0	1.33427	20.5	90909.1	24	1.17022	-33	0.954546	cisnat	dmel	9708709	dcr2het_rep1
chr2L-419985_420702	718	-10.237	0.998635	0.642424	0.542436	21	0.242424	0.163636	22	0.990375	36363.6	0.638773	2.67727	-238.7	-0.333333	0	-33	0	-33	20	48484.8	24	2.35047	-33	0.933333	cisnat	dmel	9708709	dcr2het_rep1
chr2L-4461666_4461798	133	-5.82702	0.863767	0.622641	0.341806	21	0.433962	0.283019	22	-0.660827	0	0.439394	2.36628	-16.2	-0.333333	0.375	-0.503953	0	1.94778	23	75471.7	26	1.85739	-33	0.90566	cisnat	dmel	9708709	dcr2het_rep1
chr2L-5047823_5047898	76	-4.56393	0.963999	0.511111	0.321704	21	0.466667	0.266667	22	-1	0	0.346667	2.04509	NA	-33	0.511628	-0.391618	0	1.72856	21	355556	10	2.71163	-33	0.911111	cisnat	dmel	9708709	dcr2het_rep1
chr2L-5521307_5521364	58	-1.54363	0.85759	0.625	0.354532	21	0.1875	0.4375	22	-0.333333	0	0.280702	2.31318	NA	-33	0.177778	-33	0	-33	20	125000	18	-33	-33	1	cisnat	dmel	9708709	dcr2het_rep1
chr2L-8316752_8317015	264	-6.03953	0.998725	0.594595	0.289333	21	0.36036	0.324324	22	1.51526	72072.1	0.638783	2.59016	-41.6	-33	0.568182	-33	-11.3	-33	20	90090.1	19	1.02291	-33	0.891892	cisnat	dmel	9708709	dcr2het_rep1
chr2L-8383648_8384689	1042	-5.65663	0.999614	0.580645	0.396589	21	0.354839	0.16129	22	0.142134	16129	0.597502	2.31054	-263.9	-33	0	-33	0	-33	19.75	32258.1	11	2.35047	-33	0.790323	cisnat	dmel	9708709	dcr2het_rep1
chr2L-9896285_9897126	842	-9.28156	0.999336	0.571429	0.602626	21	0.242857	0.157143	21.5	-0.150012	7142.86	0.639715	2.44912	-324.9	1.76383	0	-33	0	-33	21	42857.1	22.5	1.36335	-33	0.985714	cisnat	dmel	9708709	dcr2het_rep1
chr2L-104062_104123	62	-11.4884	0.979978	0.555556	0.239715	21	0.376068	0.401709	22	0.534523	188034	0.196721	1.97211	NA	-33	0.218182	-33	0	-33	21	213675	19	0.898911	-33	0.752137	cisnat	dmel	13281103	dcr2het_rep2
chr2L-122447_123934	1488	-6.13655	0.960328	0.641509	0.390577	21	0.226415	0.377358	22	-33	0	0.564896	2.33856	-285.7	2.66667	0	-33	0	-33	-33	-33	-33	3.39405	1.64533	1	cisnat	dmel	13281103	dcr2het_rep2
chr2L-271649_272513	865	-4.29163	0.820063	0.733333	0.380296	19	0.1	0.533333	22	2.66667	33333.3	0.634259	2.17899	-236.6	-33	0	-33	0	-33	-33	-33	-33	-33	-33	0.666667	cisnat	dmel	13281103	dcr2het_rep2
chr2L-281697_282211	515	-10.4667	0.999986	0.523077	0.351933	21	0.338462	0.369231	22	0.19245	30769.2	0.575875	1.81557	-103.4	-33	0	-33	0	-33	21	123077	22	1.42415	-33	0.969231	cisnat	dmel	13281103	dcr2het_rep2
chr2L-2875624_2877121	1498	-6.4917	0.967684	0.6	0.309551	21	0.538462	0.307692	23	-0.95758	15384.6	0.617235	2.08584	-447.8	-33	0	-33	0	-33	21	353846	22	2.56172	-33	0.784615	cisnat	dmel	13281103	dcr2het_rep2
chr2L-2878578_2878933	356	-22.2569	1	0.516704	0.584765	21	0.233853	0.218263	22	0.422537	169265	0.580282	1.97909	-122.2	-33	0	-33	0	-33	21	265033	19	0.0515735	-33	0.797327	cisnat	dmel	13281103	dcr2het_rep2
chr2L-3021344_3021488	145	-17.8556	1	0.538462	0.309534	21	0.380342	0.367521	22	0.52223	256410	0.486111	1.80104	-18.7	-33	0.478261	-0.359573	0	1.76817	21	269231	27	0.713951	-33	0.760684	cisnat	dmel	13281103	dcr2het_rep2
chr2L-3453706_3453753	48	-10.2793	0.996456	0.524691	0.351456	21	0.401235	0.0617284	22	0.65542	574074	0.340425	2.40732	NA	-33	0.488889	0.855163	0	2.12972	21	302469	19	2.38699	-33	0.598765	cisnat	dmel	13281103	dcr2het_rep2
chr2L-419985_420702	718	-27.5913	0.999995	0.563202	0.541173	21	0.227528	0.266854	22	0.502595	154494	0.638773	2.0743	-238.7	-0.942809	0	-33	0	-33	21	207865	19	0.716277	2.35047	0.849719	cisnat	dmel	13281103	dcr2het_rep2
chr2L-4442888_4442985	98	-14.362	0.999992	0.532632	0.451587	21	0.189474	0.448421	22	0.358602	863158	0.474227	2.25727	-14.5	-33	0.5	-33	0	-33	21	534737	19	1.85468	-33	0.543158	cisnat	dmel	13281103	dcr2het_rep2
chr2L-4461666_4461798	133	-19.6438	0.999859	0.513026	0.327595	21	0.476954	0.246493	22	0.42182	505010	0.439394	2.00597	-16.2	-1.66667	0.375	-33	0	-33	21	511022	19	1.33209	1.64533	0.583166	cisnat	dmel	13281103	dcr2het_rep2
chr2L-4948213_4948310	98	-8.00513	0.999534	0.51938	0.292929	21	0.302326	0.341085	22	1.03924	155039	0.57732	1.88397	-11.6	-0.142134	0.583333	-33	0	-33	21	155039	23	1.03632	-33	0.821705	cisnat	dmel	13281103	dcr2het_rep2
chr2L-4966284_4966389	106	-15.252	0.999999	0.549296	0.398406	21	0.408451	0.219718	22	0.984302	647887	0.4	1.99505	-12.6	1.67641	0.338028	-33	0	-33	21	518310	19	0.904869	-33	0.628169	cisnat	dmel	13281103	dcr2het_rep2
chr2L-4973671_4973943	273	-10.7989	0.986462	0.582279	0.348769	21	0.379747	0.291139	22	-0.589768	37974.7	0.558824	2.17835	-45.8	-33	0.684211	-33	-13.2	-33	21.5	75949.4	18	1.60657	-33	0.911392	cisnat	dmel	13281103	dcr2het_rep2
chr2L-5047823_5047898	76	-14.2753	0.996799	0.524106	0.322017	21	0.499222	0.335925	22	0.00561305	947123	0.346667	2.31688	NA	-33	0.5	-0.506888	0	1.88307	21	626750	19	1.74814	-33	0.40902	cisnat	dmel	13281103	dcr2het_rep2
chr2L-5055988_5056149	162	-17.5022	0.998267	0.533333	0.316116	21	0.496667	0.316667	22	-0.0983313	180000	0.534161	2.19861	-27.3	-0.108505	0.56338	0.240445	-13.5	1.99782	21	196667	19	0.0465928	-33	0.703333	cisnat	dmel	13281103	dcr2het_rep2
chr2L-544101_545737	1637	-11.42	0.994342	0.5125	0.55391	21	0.225	0.175	21	0.142134	12500	0.613692	2.18794	-509	-0.333333	0	-33	0	-33	21	87500	11	3.00327	-33	1	cisnat	dmel	13281103	dcr2het_rep2
chr2L-5521307_5521364	58	-12.7769	0.999949	0.558659	0.352621	21	0.256983	0.329609	22	0.0431222	307263	0.280702	1.98887	NA	-33	0.266667	-33	0	-33	21	307263	19	2.32959	-33	0.681564	cisnat	dmel	13281103	dcr2het_rep2
NC_004354.4:16788716-16791522	2806	-8.72871	0.995909	0.587879	0.398118	21	0.266667	0.248485	22	1.5876	339394	0.59943	2.07422	-781.5	-33	0	-33	0	-33	-33	-33	-33	2.71163	-33	0.587879	cisnat	dmel	192595761	ovary_v097
NC_004354.4:2264162-2267871	3709	-8.25199	0.992974	0.652672	0.477617	21	0.263359	0.0916031	22	0.11438	580153	0.605554	2.52121	-1038.67	-0.333333	0	-33	0	-33	22	38167.9	24	2.90856	-33	0.362595	cisnat	dmel	192595761	ovary_v097
NT_033777.3:23123447-23127744	4297	-9.14028	0.989575	0.521429	0.419225	21	0.307143	0.185714	22	1.74109	157143	0.628811	2.16257	-1330.1	-33	0	-33	0	-33	22	35714.3	19	0.935514	2.35047	0.764286	cisnat	dmel	192595761	ovary_v097
NT_033777.3:24327953-24330759	2806	-5.10539	0.98333	0.630435	0.468874	21	0.266304	0.326087	22	1.97784	1364130	0.622951	2.63843	-826.5	-33	0	-33	0	-33	22	152174	23	2.46074	-33	0.48913	cisnat	dmel	192595761	ovary_v097
NT_033777.3:24623130-24626419	3289	-8.1501	0.991579	0.585492	0.404268	21	0.196891	0.378238	22	1.11011	98445.6	0.614776	2.64131	-965.6	-33	0	-33	0	-33	25	10362.7	22	1.98738	-33	0.523316	cisnat	dmel	192595761	ovary_v097
NT_033778.4:14162277-14170375	8098	-9.97969	0.9891	0.79562	0.379611	21	0.211679	0.510949	22	1.63299	10948.9	0.625834	2.72221	-2386.6	-33	0	-33	0	-33	22	83941.6	4	1.81117	-33	0.525547	cisnat	dmel	192595761	ovary_v097
NT_033779.5:13209807-13212214	2407	-10.6415	0.952859	0.838163	0.475026	21	0.137809	0.273498	22	0.122501	79858.7	0.619859	2.51078	-743.7	-33	0	-33	0	-33	22	147703	19	1.08411	2.48243	0.337103	cisnat	dmel	192595761	ovary_v097
NT_037436.4:15560173-15572219	12046	-12.1865	0.989323	0.751092	0.405914	21	0.351528	0.290393	22	-0.554156	74235.8	0	-33	0	-33	0	-33	0	-33	22	93886.5	25	2.35047	2.90856	0.412664	cisnat	dmel	192595761	ovary_v097
Dsim_2L:10037330-10045191	7861	-19.5667	0.79385	0.590112	0.384325	18	0.371611	0.291866	22	-0.815791	0	0.636815	3.06153	-2410.9	-0.503953	0	-33	0	-33	21.5	172249	26	2.29556	-33	0.708134	cisnat	dmel	192595761	ovary_v097
Dsim_X:5940806-5945559	4753	-14.0722	0.999136	0.548817	0.490645	21	0.143491	0.18787	22	-0.261061	630178	0.662319	2.85982	-1925.7	-0.333333	0	-33	0	-33	22	1316568	20	1.47896	-33	0.337278	cisnat	dsim	26521904	sz_129
Dsim_X:5940806-5945559	4753	-14.0357	0.676506	0.835294	0.605827	18	0.0521008	0.0857143	22	1.07593	11764.7	0.662319	2.96875	-1925.7	-0.333333	0	-33	0	-33	22	10084	18	3.39405	-33	0.327731	cisnat	dsim	8530425	wxd1_rep1
NT_033777.3:14319693-14323990	4297	-10.3804	0.996737	0.773006	0.351197	21	0.153374	0.177914	22	0.7533	251534	0.62788	2.95721	-1216.7	-33	0	-33	0	-33	21.5	36809.8	19	-33	-33	0.503068	cisnat	dmel	283063946	bonini_head_3d_wt SRR1042403
NT_033777.3:15358086-15360136	2050	-8.21636	0.998613	0.512195	0.388457	21	0.280488	0.378049	22	2.33855	536585	0.637073	2.46961	-591.3	-33	0	-33	0	-33	22	243902	20	2.35047	-33	0.670732	cisnat	dmel	283063946	bonini_head_3d_wt SRR1042404
NT_033777.3:26910278-26913063	2785	-6.15923	0.997896	0.557895	0.338393	21	0.2	0.326316	22	1.16629	200000	0.622621	2.43498	-866.8	-33	0	-33	0	-33	22	105263	24	1.79411	-33	0.726316	cisnat	dmel	283063946	bonini_head_3d_wt SRR1042405
NT_033778.4:6808557-6810712	2155	-3.03649	0.986309	0.861111	0.434524	21	0.111111	0.194444	23	-0.333333	0	0.612529	2.92661	-648	-33	0	-33	0	-33	-33	-33	-33	3.39405	-33	0.472222	cisnat	dmel	283063946	bonini_head_3d_wt SRR1042406
NT_033779.5:13209807-13212214	2407	-12.4588	0.967903	0.989728	0.345702	22	0.073716	0.44139	23	-0.393572	1208.46	0.619859	2.21837	-743.7	-33	0	-33	0	-33	23	33836.9	13	1.64533	1.1088	0.145015	cisnat	dmel	283063946	bonini_head_3d_wt SRR1042407
NT_037436.4:15560173-15572219	12046	-11.5249	0.997489	0.727273	0.456655	21	0.183413	0.472089	22	-0.622077	41467.3	0	-33	0	-33	0	-33	0	-33	22	86124.4	26	2.13896	-33	0.264753	cisnat	dmel	283063946	bonini_head_3d_wt SRR1042408
NT_037436.4:15608202-15619912	11710	-10.9784	0.997808	0.609836	0.417237	21	0.288525	0.354098	22	0.296404	196721	0	-33	0	-33	0	-33	0	-33	22	78688.5	24	1.64533	-33	0.413115	cisnat	dmel	283063946	bonini_head_3d_wt SRR1042409
NT_037436.4:3321619-3325622	4003	-15.8073	0.999985	0.742033	0.417148	21	0.145675	0.355083	22	0.817666	538695	0.629028	3.06275	-1286.5	-33	0	-33	0	-33	22	159332	29	2.29556	-33	0.298938	cisnat	dmel	283063946	bonini_head_3d_wt SRR1042410
HE587301:5599406-5600053	647	-25.5593	0.950616	0.598417	0.388074	20	0.291122	0.236407	21	0.356047	551273	0.602782	2.8563	-155.3	1.62472	0	-33	0	-33	20.5	463524	18	1.03646	-33	0.28011	cisnat	spidermite	2023667092	all_spidermite (SRR10513013-SRR10513019)
HE587302:3424762-3425472	710	-31.1094	0.929539	0.540714	0.41587	20	0.373634	0.307939	20	1.00747	1247779	0.549296	2.91048	-137.7	-0.383902	0	-33	0	-33	21.5	718281	19	-0.00933425	2.77507	0.197378	cisnat	spidermite	2023667092	all_spidermite (SRR10513013-SRR10513019)
HE587302:3428525-3430488	1963	-53.4335	0.947463	0.5	0.444171	20	0.3115	0.324	21	0.85164	127118	0.57565	3.00637	-417.7	-0.0629941	0	-33	0	-33	20.5	741319	18	0.692412	2.9647	0.17785	cisnat	spidermite	2023667092	all_spidermite (SRR10513013-SRR10513019)
HE587302:5866294-5867863	1569	-50.2975	0.913359	0.52154	0.428173	20	0.33415	0.279441	20	0.42911	101601	0.660293	3.06622	-524.1	1.51749	0	-33	0	-33	23.5	591651	13	1.16854	3.00327	0.234307	cisnat	spidermite	2023667092	all_spidermite (SRR10513013-SRR10513019)
HE587306:109186-110870	1684	-39.4367	0.864357	0.5	0.476602	21	0.40755	0.24735	22	0.221517	226.411	0.597387	3.21135	-470.1	-0.83658	0	-33	0	-33	20	756.006	24	0.418892	0.776313	0.0201925	cisnat	spidermite	2023667092	all_spidermite (SRR10513013-SRR10513019)
HE587306:41370-43985	2615	-38.6132	0.868587	0.5	0.483079	21	0.43755	0.25825	22	0.365307	118.029	0.593499	3.12166	-739.7	2.18314	0	-33	0	-33	23.5	1871.21	24	0.222616	0.982028	0.0192047	cisnat	spidermite	2023667092	all_spidermite (SRR10513013-SRR10513019)
HE587306:51374-53869	2495	-38.9241	0.860143	0.5	0.486303	21	0.4106	0.2391	22	-0.191511	75.4665	0.603607	3.16579	-711.3	-1.54768	0	-33	0	-33	23.5	1526.17	24	0.0882731	0.632198	0.020498	cisnat	spidermite	2023667092	all_spidermite (SRR10513013-SRR10513019)
HE587309:2134937-2142671	7734	-46.716	0.995245	0.5	0.385144	21	0.3965	0.3794	21	1.23952	208.886	0.612102	2.61814	-1571.38	0.693741	0	-33	0	-33	21.5	518.606	27	0.345927	-0.19208	0.0191033	cisnat	spidermite	2023667092	all_spidermite (SRR10513013-SRR10513019)
HE587309:2145644-2148062	2418	-44.9463	0.996927	0.5	0.353174	21	0.42035	0.19535	22	2.00924	27723.4	0.577337	2.63877	-521.3	0.157135	0	-33	0	-33	21.5	5997.32	29	1.9876	1.11315	0.0231898	cisnat	spidermite	2023667092	all_spidermite (SRR10513013-SRR10513019)
HE587309:2230500-2234259	3759	-44.8658	0.996255	0.5	0.379857	22	0.37755	0.30135	22	-0.399972	492.517	0.554935	2.92607	-661.84	-0.067953	0	-33	0	-33	23	1583.02	27	0.0988222	0.419308	0.0178366	cisnat	spidermite	2023667092	all_spidermite (SRR10513013-SRR10513019)
HE587309:2234261-2237124	2863	-45.6404	0.993909	0.5	0.380829	21	0.3151	0.2743	22	1.35415	3875.82	0.633601	2.67331	-673.2	0.470588	0	-33	0	-33	21.5	3737.86	29	0.384795	1.87574	0.0276001	cisnat	spidermite	2023667092	all_spidermite (SRR10513013-SRR10513019)
HE587309:2238208-2242233	4025	-45.9817	0.994788	0.5	0.373125	21	0.3719	0.29085	21	0.329432	550.48	0.605714	2.58698	-846.9	2.00281	0	-33	0	-33	22.5	2615.23	19	0.396591	0.0132662	0.0229473	cisnat	spidermite	2023667092	all_spidermite (SRR10513013-SRR10513019)
HE587309:2247628-2255174	7546	-45.6687	0.993702	0.5	0.376912	21	0.40255	0.287	22	0.965916	179.625	0.604824	2.9866	-1585.34	1.55983	0	-33	0	-33	21.5	678.709	15	0.449176	0.770744	0.0203172	cisnat	spidermite	2023667092	all_spidermite (SRR10513013-SRR10513019)
HE587317:233680-234200	520	-37.4859	0.947545	0.5	0.40614	20	0.48	0.33975	21	2.07116	378224	0.580769	2.9587	-113.8	0.824516	0	-33	0	-33	21.5	405220	22	0.995336	2.29556	0.0385755	cisnat	spidermite	2023667092	all_spidermite (SRR10513013-SRR10513019)
HE587320:930682-932118	1436	-36.8367	0.933603	0.555202	0.383294	21	0.355147	0.310044	20	1.79593	810598	0.604457	2.67942	-307.8	-0.252386	0	-33	0	-33	21.5	259685	14	1.66831	2.22532	0.249308	cisnat	spidermite	2023667092	all_spidermite (SRR10513013-SRR10513019)
HE587320:932835-934142	1307	-36.5497	0.955068	0.581172	0.445265	20	0.35885	0.293687	22	0.388985	474183	0.579954	2.9921	-302.7	-0.243841	0	-33	0	-33	20.5	229087	25	-0.0758232	-33	0.257948	cisnat	spidermite	2023667092	all_spidermite (SRR10513013-SRR10513019)
HE587320:936782-937727	945	-32.5897	0.954025	0.541929	0.452674	20	0.258157	0.2915	22	0.387918	679880	0.594709	2.96612	-235.5	0.658178	0	-33	0	-33	20.5	259874	25	-0.0155734	-33	0.249714	cisnat	spidermite	2023667092	all_spidermite (SRR10513013-SRR10513019)
HE587320:945363-946858	1495	-30.2955	0.935318	0.584161	0.408027	20	0.311213	0.287721	20	1.06983	142165	0.584615	2.88185	-339.6	0	0	-33	0	-33	21	71445.9	11	1.48669	-33	0.321385	cisnat	spidermite	2023667092	all_spidermite (SRR10513013-SRR10513019)
HE587342:198085-199376	1291	-40.3409	0.865305	0.5	0.481243	21	0.2486	0.2306	21	0.32221	182.108	0.670798	3.07477	-444.7	0.307408	0	-33	0	-33	20.5	1535.73	12	0.279769	0.12061	0.0174983	cisnat	spidermite	2023667092	all_spidermite (SRR10513013-SRR10513019)
HE587342:35820-36748	928	-38.2652	0.858339	0.5	0.488758	21	0.1852	0.27595	22	0.158431	1197.09	0.642241	3.08592	-336.3	-0.261283	0	-33	0	-33	20	2972.9	24	0.325378	1.29099	0.0194978	cisnat	spidermite	2023667092	all_spidermite (SRR10513013-SRR10513019)
HE587342:57799-58427	628	-42.3327	0.862163	0.5	0.477805	21	0.30255	0.2579	21	0.646633	1097.57	0.656051	3.00794	-206.2	-0.557699	0	-33	0	-33	21.5	9597.98	6	0.648534	0.720006	0.0162245	cisnat	spidermite	2023667092	all_spidermite (SRR10513013-SRR10513019)
Dsim_2L:11037157-11038850	1693	-11.4509	0.983084	0.627615	0.376548	21	0.364017	0.267782	22	1.46406	92050.2	0.591849	2.50855	-413.27	0	0	-33	0	-33	22	37656.9	27	1.15508	2.35047	0.748954	cisnat	dsim	26521904	sz_129
Dsim_2L:13792268-13793679	1411	-17.7727	0.999963	0.665689	0.427482	21	0.293255	0.26393	22	-0.0435233	90909.1	0.60241	2.54808	-432.9	-0.333333	0	-33	0	-33	22	158358	27	0.680485	-33	0.592375	cisnat	dsim	26521904	sz_129
Dsim_2R:10715779-10717903	2124	-22.7903	0.997691	0.633093	0.441319	21	0.42446	0.199041	22	0.682171	38369.3	0.605461	2.47602	-553.11	-0.333333	0	-33	0	-33	22	38369.3	25	1.41425	-33	0.772182	cisnat	dsim	26521904	sz_129
Dsim_2R:11309256-11309648	392	-8.89484	0.999931	0.752336	0.382169	21	0.373832	0.378505	22	0.667598	411215	0.576531	2.65792	-84.14	-33	0	-33	0	-33	22	364486	16	1.78616	-33	0.462617	cisnat	dsim	26521904	sz_129
Dsim_2R:11309356-11309615	259	-7.3537	0.999994	0.76555	0.377669	21	0.373206	0.382775	22	0.667598	421053	0.478764	2.65786	-40.24	-33	0.351351	-0.416667	0	1.86293	22	373206	16	1.82988	-33	0.454545	cisnat	dsim	26521904	sz_129
Dsim_2R:9424947-9426195	1248	-23.028	1	0.547862	0.403476	21	0.405295	0.281059	22	-0.0394314	120163	0.61859	2.27477	-345.6	-0.503953	0	-33	0	-33	22	126273	28	1.16226	-33	0.633401	cisnat	dsim	26521904	sz_129
Dsim_3L:15391987-15392977	990	-16.4669	0.999999	0.534404	0.366784	21	0.275229	0.25	22	0.55231	302752	0.59798	2.2164	-245.6	-1.13707	0	-33	0	-33	22	185780	28	0.472456	-33	0.472477	cisnat	dsim	26521904	sz_129
Dsim_3L:15439144-15440578	1434	-18.114	0.999566	0.546083	0.379507	21	0.343318	0.281106	22	-0.250686	216590	0.609484	2.39181	-324.7	-0.333333	0	-33	0	-33	22	223502	20	0.621424	-33	0.599078	cisnat	dsim	26521904	sz_129
Dsim_3L:722254-723743	1489	-16.7489	0.999993	0.59375	0.445364	21	0.246094	0.316406	22	0.694365	105469	0.615178	2.60396	-456.3	-33	0	-33	0	-33	22	89843.8	11	0.94615	-33	0.71875	cisnat	dsim	26521904	sz_129
Dsim_3R:11350491-11353345	2854	-20.443	0.999487	0.557734	0.411523	21	0.444444	0.233116	22	0.310989	119826	0.623686	2.91527	-841.1	-33	0	-33	0	-33	22	239651	8	1.09363	-33	0.588235	cisnat	dsim	26521904	sz_129
Dsim_3R:15858094-15859935	1841	-20.0883	0.999997	0.558655	0.349788	21	0.320755	0.26087	22	0.275869	886792	0.520369	2.62987	-430	-0.333333	0	-33	0	-33	22	498770	17	0.880032	-33	0.364233	cisnat	dsim	26521904	sz_129
Dsim_3R:17051388-17051818	430	-15.5001	0.999999	0.633987	0.416675	21	0.330065	0.326797	22	2.10799	660131	0.595349	2.31641	-91.3	-0.491473	0	-33	0	-33	22	307190	23	1.34691	-33	0.535948	cisnat	dsim	26521904	sz_129
Dsim_3R:19502571-19503675	1104	-9.55072	0.999878	0.628099	0.551357	21	0.371901	0.264463	22	0.485368	206612	0.67029	2.58249	-419.1	1.05409	0	-33	0	-33	22.5	82644.6	27.5	2.29556	-33	0.603306	cisnat	dsim	26521904	sz_129
Dsim_3R:19502951-19503263	312	-9.86364	0.949102	0.633929	0.555005	21	0.392857	0.25	22	0.485368	223214	0.608974	2.58162	-95.6	1.05409	0	-33	0	-33	22.5	89285.7	27.5	2.29556	-33	0.589286	cisnat	dsim	26521904	sz_129
Dsim_3R:21098774-21099391	617	-16.976	0.999998	0.739941	0.425408	21	0.291462	0.349362	22	0.244492	1121688	0.573744	2.50244	-129.8	-33	0	-33	0	-33	22	2508342	10	-0.135776	-33	0.290481	cisnat	dsim	26521904	sz_129
Dsim_3R:2185368-2186119	751	-16.2054	0.999905	0.532763	0.363781	21	0.381766	0.276353	22	0.614932	464388	0.601864	2.53152	-156.8	-33	0	-33	0	-33	22	227920	19	0.188395	1.64533	0.524216	cisnat	dsim	26521904	sz_129
Dsim_3R:23659082-23659843	761	-12.7061	0.999999	0.679144	0.347556	21	0.195187	0.294118	22	0.317049	363636	0.583443	2.43455	-178.7	-0.333333	0	-33	0	-33	22	93582.9	24	0.660644	-33	0.454545	cisnat	dsim	26521904	sz_129
Dsim_3R:4054972-4055934	962	-11.3824	0.999296	0.566038	0.373404	21	0.358491	0.18239	22	1.20662	949686	0.636175	2.46879	-229	-33	0	-33	0	-33	22	182390	24	1.48964	-33	0.572327	cisnat	dsim	26521904	sz_129
Dsim_3R:5589771-5590610	839	-17.9436	0.929018	0.531135	0.413265	21	0.380952	0.267399	22	-0.554744	95238.1	0.64124	2.63291	-221.2	-33	0	-33	0	-33	22	249084	18	1.00535	-33	0.593407	cisnat	dsim	26521904	sz_129
Dsim_X:16276309-16277321	1012	-22.1124	0.999911	0.521277	0.387059	21	0.306738	0.237589	22	-0.280211	242908	0.575099	2.90316	-235.3	-0.333333	0	-33	0	-33	22	164894	26	1.71794	-33	0.569149	cisnat	dsim	26521904	sz_129
Dsim_X:22799641-22802515	2874	-29.0733	0.999664	0.519048	0.468262	21	0.287302	0.350794	22	0.793671	71428.6	0.617954	2.61414	-873.6	-0.503953	0	-33	0	-33	22	53968.2	27	0.601806	-33	0.752381	cisnat	dsim	26521904	sz_129
Dsim_X:5942091-5942456	365	-10.176	0.999997	0.55137	0.47654	21	0.138699	0.196918	22	-0.261061	729452	0.608219	2.85888	-123.9	-0.333333	0	-33	0	-33	22	1523973	20	1.47896	-33	0.260274	cisnat	dsim	26521904	sz_129
Dsim_2L:16233056-16233489	433	-7.062	0.955063	0.693694	0.259761	21	0.378378	0.243243	22	2.43145	180180	0.577367	2.56555	-77.8	-33	0	-33	0	-33	22	369369	13	1.10459	-33	0.774775	cisnat	dsim	8530425	wxd1_rep1
Dsim_2L:19695348-19695698	350	-4.54817	0.818443	0.746269	0.368135	19	0.19403	0.507463	22	0.471405	14925.4	0.565714	2.28786	-77.8	-33	0	-33	0	-33	20.5	59701.5	28	2.35047	-33	0.507463	cisnat	dsim	8530425	wxd1_rep1
Dsim_2L:19695375-19695690	315	-4.54817	0.818443	0.746269	0.368135	19	0.19403	0.507463	22	0.471405	14925.4	0.526984	2.28786	-61.8	-33	0	-33	0	-33	20.5	59701.5	28	2.35047	-33	0.507463	cisnat	dsim	8530425	wxd1_rep1
Dsim_2L:19695375-19695690	315	-4.54817	0.818443	0.746269	0.368135	19	0.19403	0.507463	22	0.471405	14925.4	0.526984	2.28786	-61.8	-33	0	-33	0	-33	20.5	59701.5	28	2.35047	-33	0.507463	cisnat	dsim	8530425	wxd1_rep1
Dsim_2R:5775214-5779469	4255	-25.3883	0.957069	0.560365	0.498088	21	0.198178	0.242597	22	1.23346	70615	0.621387	3.03261	-1365.2	1.3538	0	-33	0	-33	22	74031.9	23	1.60279	-33	0.828018	cisnat	dsim	8530425	wxd1_rep1
Dsim_2R:5775702-5780020	4318	-25.6343	0.95822	0.550857	0.500182	21	0.188571	0.24	22	1.23346	70857.1	0.632237	3.03313	-1451.7	1.12437	0	-33	0	-33	22	74285.7	23	1.62471	-33	0.826286	cisnat	dsim	8530425	wxd1_rep1
Dsim_2R:5776158-5780672	4514	-25.6135	0.956022	0.547619	0.500581	21	0.190476	0.236961	22	1.23346	70294.8	0.644218	3.03289	-1560.44	1.19046	0	-33	0	-33	22	73696.1	23	1.62471	-33	0.827664	cisnat	dsim	8530425	wxd1_rep1
Dsim_2R:7303677-7303920	243	-8.50864	0.994222	0.613445	0.282629	21	0.294118	0.487395	22	0.93044	252101	0.534979	2.49874	-35.6	-33	0.375	-0.547997	-10.4	1.59705	22	394958	25	1.62757	-33	0.672269	cisnat	dsim	8530425	wxd1_rep1
Dsim_2R:8970438-8971203	765	-8.9012	0.954288	0.51	0.295628	21	0.33	0.42	22	1.29899	120000	0.630065	2.16677	-229.1	-33	0	-33	0	-33	22	80000	17	1.99649	-33	0.82	cisnat	dsim	8530425	wxd1_rep1
Dsim_2R:10314577-10314975	398	-9.09833	0.929468	0.546296	0.302696	21	0.287037	0.277778	22	1.78776	166667	0.58794	2.4486	-93.7	-33	0	-33	0	-33	21.5	101852	18	2.29556	-33	0.87037	cisnat	dsim	8530425	wxd1_rep1
Dsim_2R:11327289-11328780	1491	-15.5017	0.94031	0.509804	0.284201	21	0.242647	0.362745	21	-0.0729441	98039.2	0.61167	3.16778	-400.2	-33	0	-33	0	-33	22	51470.6	20	1.03983	-33	0.654412	cisnat	dsim	8530425	wxd1_rep1
Dsim_2R:11327651-11328350	699	-13.8635	0.968264	0.523605	0.298332	21	0.283262	0.339056	22	0.622307	55794	0.597997	2.64123	-162.1	-33	0	-33	0	-33	22	90128.8	15	1.31688	-33	0.811159	cisnat	dsim	8530425	wxd1_rep1
Dsim_2R:15528089-15531811	3722	-20.227	0.841285	0.723224	0.375325	18	0.195122	0.401909	22	0.847173	39236.5	0.598066	3.10913	-939.8	-1	0	-33	0	-33	20.5	110286	8	0.216401	-33	0.475079	cisnat	dsim	8530425	wxd1_rep1
Dsim_2R:15530096-15530857	761	-19.2673	0.952316	0.637744	0.432236	21	0.260304	0.362256	22	0.811599	73752.7	0.61498	2.36122	-209.7	-0.57735	0	-33	0	-33	20.5	225596	8	0.572091	-33	0.709327	cisnat	dsim	8530425	wxd1_rep1
Dsim_2R:15586074-15587109	1035	-9.10567	0.957874	0.504348	0.294443	21	0.373913	0.417391	22	0.320697	52173.9	0.583575	2.35197	-269.2	-33	0	-33	0	-33	22	130435	24	1.98148	-33	0.886957	cisnat	dsim	8530425	wxd1_rep1
Dsim_2R:21923337-21926992	3655	-31.4341	0.988163	0.553391	0.445894	21	0.303297	0.264518	22	0.226302	463282	0.634747	2.53327	-1152.9	0.0671724	0	-33	0	-33	22	243350	19	1.38034	1.64533	0.420757	cisnat	dsim	8530425	wxd1_rep1
Dsim_3L:3017479-3019123	1644	-7.15959	0.88249	0.527273	0.310862	21	0.218182	0.327273	22	2.46721	427273	0.60219	2.46413	-455.4	-33	0	-33	0	-33	21.5	90909.1	20.5	2.35203	-33	0.763636	cisnat	dsim	8530425	wxd1_rep1
Dsim_3L:5726185-5729761	3576	-12.3033	0.781157	0.836289	0.242437	18	0.279673	0.331514	22	-0.435913	31377.9	0.618568	2.78875	-1049.2	-33	0	-33	0	-33	22	84583.9	23	1.26801	-33	0.302865	cisnat	dsim	8530425	wxd1_rep1
Dsim_3L:15392050-15393110	1060	-21.088	0.976621	0.506431	0.307521	21	0.29582	0.300643	22	1.06466	278135	0.611321	2.53975	-276.9	0.393178	0	-33	0	-33	22	290997	28	0.934976	1.64533	0.638264	cisnat	dsim	8530425	wxd1_rep1
Dsim_3R:11330787-11331853	1066	-8.73582	0.899811	0.52518	0.320705	21	0.33813	0.381295	22	0.734114	64748.2	0.609756	2.77959	-275	-33	0	-33	0	-33	22	115108	25	1.25378	-33	0.827338	cisnat	dsim	8530425	wxd1_rep1
Dsim_3R:21125867-21127417	1550	-12.4951	0.926092	0.553846	0.348659	21	0.317949	0.323077	22	1.77384	123077	0.645161	2.50341	-458.9	-33	0	-33	0	-33	20.5	92307.7	8	1.35859	-33	0.861538	cisnat	dsim	8530425	wxd1_rep1
Dsim_3R:23658962-23659916	954	-8.83849	0.934612	0.601852	0.327218	21	0.12963	0.462963	22	2.07333	111111	0.584906	2.21263	-250.8	-0.843274	0	-33	0	-33	22	46296.3	15	3.39405	-33	0.842593	cisnat	dsim	8530425	wxd1_rep1
Dsim_X:14973583-14975716	2133	-27.4117	0.993586	0.569271	0.495173	21	0.276042	0.185938	22	0.168882	621354	0.636662	2.47762	-748	-33	0	-33	0	-33	22	877604	12	0.712694	-33	0.496354	cisnat	dsim	8530425	wxd1_rep1
NT_033779.5:4947971-4948538	567	-10.5616	0.887161	0.761006	0.436927	21	0.396226	0.238994	22	0.261429	75471.7	0.610229	2.5529	-143.5	-33	0	-33	0	-33	21	37735.8	24	2.35047	-33	0.861635	cisnat	dmel	1426901019	ok_male_M002
NT_033779.5:5243222-5244456	1234	-46.1141	0.991767	0.534056	0.523769	21	0.176536	0.23186	22	0.442126	491243	0.578606	2.67292	-317.9	0.754851	0	-33	0	-33	22	531276	30	-0.203369	-33	0.574646	cisnat	dmel	1426901019	ok_male_M002
NT_033779.5:9787196-9788611	1415	-22.8982	0.870156	0.557895	0.545129	18	0.207519	0.240601	19	-0.0481338	27067.7	0.609187	3.06577	-432.4	-33	0	-33	0	-33	21.5	37594	18	0.0468498	-33	0.83609	cisnat	dmel	1426901019	ok_male_M002
chr2L:5243222-5244456	1234	-37.6625	0.996876	0.545537	0.492381	21	0.223166	0.275208	22	0.446491	710878	0.578606	2.45964	-317.9	-1.4252	0	-33	0	-33	22	923744	10	0.969792	-33	0.460969	cisnat	dmel	9708709	dcr2het_rep1
chr2L:8316678-8317143	465	-6.23481	0.992488	0.590909	0.28822	21	0.363636	0.327273	22	1.51526	72727.3	0.619355	2.59016	-77.9	-33	0	-33	0	-33	21	90909.1	20	1.02291	-33	0.890909	cisnat	dmel	9708709	dcr2het_rep1
chr3R:5227192-5227696	504	-11.3038	0.99249	0.508876	0.340883	21	0.307692	0.337278	22	-0.473511	53254.4	0.575397	2.32655	-97.1	1.05409	0	-33	0	-33	21	142012	20	0.739695	-33	0.840237	cisnat	dmel	9708709	dcr2het_rep1
chr3R:5589570-5589776	206	-4.89501	0.980991	0.581818	0.352658	21	0.4	0.2	22	1.19257	145454	0.582524	2.12644	-40	-1.05409	0.556701	-0.666667	-17.9	1.98137	22	72727.3	24	2.48243	-33	0.909091	cisnat	dmel	9708709	dcr2het_rep1
NC_004354.4:6289293-6289776	483	-7.75008	0.893304	0.769231	0.499045	21	0.184615	0.230769	22	-0.447958	107692	0.604555	2.34306	-157.4	-33	0	-33	0	-33	22	146154	20	3.39405	-33	0.384615	cisnat	dmel	204807195	ok_ovary_cs
NT_033777.3:10766287-10767117	830	-13.0282	0.880209	0.637306	0.359395	21	0.476684	0.217617	22	2.14385	82901.6	0.571084	2.72343	-175.6	-33	0	-33	0	-33	23	20725.4	23	2.35047	1.64533	0.61658	cisnat	dmel	204807195	ok_ovary_cs
NT_033777.3:23123643-23124568	925	-13.0975	0.892541	0.533333	0.401228	21	0.311111	0.22963	22	2.03293	266667	0.652973	2.18805	-241.5	-0.333333	0	-33	0	-33	22	66666.7	19	1.13228	2.35047	0.762963	cisnat	dmel	204807195	ok_ovary_cs
NT_033777.3:24327318-24329300	1982	-8.85929	0.87634	0.61236	0.466788	21	0.252809	0.38764	22	1.80366	1376404	0.596367	2.41109	-577.5	-33	0	-33	0	-33	22	168539	23	2.22712	-33	0.494382	cisnat	dmel	204807195	ok_ovary_cs
NT_033777.3:27932066-27934278	2212	-9.45444	0.865988	0.654206	0.438264	21	0.28972	0.317757	22	1.00353	46729	0.605787	2.08653	-635.2	-33	0	-33	0	-33	25.5	18691.6	29	2.90856	1.64533	0.82243	cisnat	dmel	204807195	ok_ovary_cs
NT_033779.5:13209808-13212215	2407	-19.7334	0.880865	0.793683	0.486614	21	0.143817	0.28293	22	0.428532	206317	0.619859	2.41123	-743.7	-33	0	-33	0	-33	22	224462	18	1.14914	2.90856	0.393817	cisnat	dmel	204807195	ok_ovary_cs
NT_033779.5:7800468-7802409	1941	-14.7524	0.89264	0.560784	0.363772	21	0.396078	0.266667	23	-0.602695	35294.1	0.594539	2.67504	-471.7	-33	0	-33	0	-33	22.5	133333	25	0.516894	-33	0.615686	cisnat	dmel	204807195	ok_ovary_cs
NT_033779.5:8400972-8402959	1987	-10.2058	0.902421	0.75122	0.34084	21	0.35122	0.219512	24	-0.616574	29268.3	0.595873	2.57804	-569.1	-33	0	-33	0	-33	22	121951	26	2.89735	-33	0.531707	cisnat	dmel	204807195	ok_ovary_cs
NT_037436.4:15560199-15561671	1472	-16.6104	0.874003	0.708895	0.384185	21	0.218329	0.355795	22	-0.543838	113208	0.616848	2.38772	-418.5	1.36083	0	-33	0	-33	22	121294	25	2.73274	2.90856	0.45283	cisnat	dmel	204807195	ok_ovary_cs
NT_037436.4:15607714-15610008	2294	-10.3751	0.912844	0.622641	0.386639	21	0.40566	0.226415	22	2.02705	94339.6	0.604185	2.41544	-554.04	-0.816497	0	-33	0	-33	22	37735.8	30	3.39405	-33	0.792453	cisnat	dmel	204807195	ok_ovary_cs
NT_037436.4:22265470-22266327	857	-14.7578	0.894668	0.644295	0.469209	21	0.181208	0.285235	22	-0.0915063	26845.6	0.623104	2.94908	-259.3	-0.333333	0	-33	0	-33	22	63758.4	11	3.39405	-33	0.469799	cisnat	dmel	204807195	ok_ovary_cs
NT_037436.4:5766776-5767400	624	-6.42247	0.925895	0.785714	0.484208	21	0.297619	0.273809	23	1.79343	107143	0.586538	2.75774	-164.5	-33	0	-33	0	-33	-33	-33	-33	2.03999	-33	0.678571	cisnat	dmel	204807195	ok_ovary_cs
NT_033777.3:14319905-14320855	950	-8.89005	0.995078	0.8	0.330585	21	0.164286	0.171429	22	0.7533	292857	0.551579	2.96921	-171.4	-33	0	-33	0	-33	21.5	42857.1	19	-33	-33	0.45	cisnat	dmel	283063946	bonini_head_3d_wt SRR1042403
NT_033777.3:26910465-26911290	825	-6.13377	0.998165	0.569893	0.335564	21	0.193548	0.322581	22	1.16629	204301	0.54303	2.42047	-202.9	-33	0	-33	0	-33	22	107527	24	1.79411	-33	0.72043	cisnat	dmel	283063946	bonini_head_3d_wt SRR1042404
NT_033777.3:5226367-5228734	2367	-7.12254	0.999375	0.614865	0.447248	21	0.202703	0.45946	22	-0.0494506	33783.8	0.6109	2.07884	-718.8	-33	0	-33	0	-33	22.5	54054.1	9	1.64533	-33	0.527027	cisnat	dmel	283063946	bonini_head_3d_wt SRR1042405
NT_033779.5:8199987-8201239	1252	-5.70895	0.97994	0.77193	0.377515	21	0.122807	0.157895	22	-0.219347	114035	0.599042	2.06349	-308.9	-33	0	-33	0	-33	22	149123	27	2.48243	-33	0.385965	cisnat	dmel	283063946	bonini_head_3d_wt SRR1042406
NT_033779.5:9786767-9788852	2085	-13.7169	0.985037	0.574468	0.555986	21	0.260638	0.37234	22	1.34715	47872.3	0.590887	2.40991	-606.6	0.952381	0	-33	0	-33	22	21276.6	23	2.9647	-33	0.75	cisnat	dmel	283063946	bonini_head_3d_wt SRR1042407
NT_037436.4:15560199-15561671	1472	-11.2915	0.999802	0.746269	0.453709	21	0.185738	0.47927	22	-0.622077	43117.7	0.616848	2.36845	-418.5	-0.933333	0	-33	0	-33	22	89552.2	26	2.13896	-33	0.235489	cisnat	dmel	283063946	bonini_head_3d_wt SRR1042408
NT_037436.4:15607714-15610008	2294	-10.6119	0.997713	0.606667	0.416089	21	0.29	0.356667	22	0.296404	200000	0.604185	2.92882	-554.04	1.30647	0	-33	0	-33	22	80000	24	1.64533	-33	0.403333	cisnat	dmel	283063946	bonini_head_3d_wt SRR1042409
NT_037436.4:3321664-3323006	1342	-15.3139	0.999989	0.74259	0.413566	21	0.145086	0.354134	22	0.817666	553822	0.646796	3.06282	-323.2	-33	0	-33	0	-33	22	163807	29	2.29556	-33	0.280811	cisnat	dmel	283063946	bonini_head_3d_wt SRR1042410
Scaffold1195:1561917-1563026	1109	-40.6999	0.966411	0.505038	0.357668	22	0.393438	0.310772	23	0.461196	571170	0.622182	2.87129	-230.1	0.503953	0	-33	0	-33	23	574012	29	1.06467	0.362953	0.296306	cisnat	whitefly	1390651722	all.bam
Scaffold1195:1597224-1597932	708	-17.5514	0.941261	0.542533	0.385024	22	0.387524	0.249527	23	0.980153	117202	0.652542	2.17361	-173.3	-0.800327	0	-33	0	-33	30.5	124764	19	0.913379	1.69286	0.465028	cisnat	whitefly	1390651722	all.bam
Scaffold1195:1854374-1854949	575	-35.3474	0.964068	0.539767	0.380705	22	0.353411	0.264226	23	0.294897	632612	0.650435	2.44281	-135.9	-0.635053	0	-33	0	-33	23	671215	27	0.221134	2.22532	0.268885	cisnat	whitefly	1390651722	all.bam
Scaffold1339:1482367-1483668	1301	-40.1438	0.983918	0.520644	0.353331	22	0.331655	0.315206	23	0.108604	328298	0.613374	2.52472	-260.4	-0.578481	0	-33	0	-33	23	192346	29	0.0174881	3.39405	0.323934	cisnat	whitefly	1390651722	all.bam
Scaffold317:642495-643380	885	-27.4785	0.995174	0.523707	0.361295	22	0.366379	0.25	23	0.70154	265086	0.569492	2.85417	-173.5	0.942809	0	-33	0	-33	23	326509	23	0.16717	-33	0.393319	cisnat	whitefly	1390651722	all.bam
Scaffold657:149513-150519	1006	-29.6161	0.980161	0.501077	0.349123	22	0.340273	0.353195	23	1.11357	283561	0.622266	2.53084	-216	-1.33333	0	-33	0	-33	23	125628	14	0.718528	-33	0.33453	cisnat	whitefly	1390651722	all.bam
Scaffold809:5566603-5567879	1276	-30.1502	0.928684	0.724549	0.341389	30	0.639647	0.235882	23	0.0602061	99116.4	0.622257	2.03824	-266	0.474219	0	-33	0	-33	29	138302	25	0.297115	1.81877	0.331156	cisnat	whitefly	1390651722	all.bam
Scaffold811:379390-380304	914	-22.6864	0.9905	0.579323	0.40436	22	0.251337	0.262032	23	2.17639	128342	0.608315	2.18348	-211.4	-0.333333	0	-33	0	-33	23	190731	29	0.990509	3.19256	0.447415	cisnat	whitefly	1390651722	all.bam
Dsim_2R:12630722-12632338	1616	-38.1901	0.993186	0.609702	0.427934	21	0.250111	0.289646	22	0.0627426	616674	0.705445	2.50099	-642.6	1.02293	0	-33	0	-33	22	924195	19	1.19075	-33	0.272289	hpRNA	dsim	11136043	wxd1_rep2
Dsim_3L:18095418-18097670	2252	-11.7956	0.978614	0.868753	0.50682	21	0.380011	0.200439	20	-0.472775	26908.3	0.615453	2.45123	-701.6	1.49992	0	-33	0	-33	23	179572	16	2.7923	-33	0.276222	hpRNA	dsim	11136043	wxd1_rep2
Dsim_3L:19781417-19782920	1503	-15.0284	0.939573	0.5	0.404521	22	0.3702	0.47695	23	0.0141984	227191	0.652029	2.57101	-442.6	1.36083	0	-33	0	-33	20.75	284.226	20	2.90856	-33	0.0236855	hpRNA	dsim	11136043	wxd1_rep2
Dsim_3L:19786984-19788667	1683	-29.9479	0.949828	0.5	0.412004	22	0.3911	0.40465	23	0.434213	224127	0.659536	2.55889	-566.4	0.888124	0	-33	0	-33	22	249904	20	1.54126	-33	0.0820297	hpRNA	dsim	11136043	wxd1_rep2
Dsim_3L:19791994-19793628	1634	-30.5674	0.950678	0.5	0.412123	22	0.3911	0.40685	23	-0.268383	94567.6	0.676867	2.57587	-546.1	1.61685	0	-33	0	-33	22	218106	20	1.69821	-33	0.0831025	hpRNA	dsim	11136043	wxd1_rep2
Dsim_3L:19798287-19799938	1651	-30.9817	0.950016	0.5	0.410558	22	0.39065	0.40565	23	0.282071	168326	0.660206	2.56926	-557.5	0.759365	0	-33	0	-33	22	234581	20	1.48762	-33	0.0861273	hpRNA	dsim	11136043	wxd1_rep2
Dsim_X:15450571-15450941	370	-12.7225	0.988131	0.790767	0.510071	21	0.115786	0.273269	22	-0.510572	11169	0.789189	2.73278	-246.7	0.919655	0	-33	0	-33	22	448250	19	1.64533	-33	0.204765	hpRNA	dsim	11136043	wxd1_rep2
Dsim_X:16605387-16611326	5939	-44.1077	0.992459	0.531887	0.443744	21	0.299771	0.261316	22	0.893335	294344	0.668463	2.58729	-2266.2	0.904065	0	-33	0	-33	22	1501161	12	1.39935	-33	0.341828	hpRNA	dsim	11136043	wxd1_rep2
Dsim_X:3961692-3962433	741	-32.6206	0.99542	0.565781	0.472322	21	0.182746	0.209321	22	0.490522	1743160	0.65857	2.29088	-255	1.37032	0	-33	0	-33	22	1794083	29	2.02791	-33	0.316272	hpRNA	dsim	11136043	wxd1_rep2
Dsim_2L:12746373-12747032	659	-28.1412	0.99278	0.647059	0.274018	21	0.298877	0.471555	23	-0.302164	573362	0.810319	2.48688	-306	1.69579	0	-33	0	-33	22	2369748	26	1.64319	-33	0.196698	hpRNA	dsim	8530425	wxd1_rep1
Dsim_2R:10980949-10983933	2984	-41.6758	0.998266	0.5	0.36857	21	0.23975	0.2928	21	-0.159505	121673	0.660188	2.22963	-1053.4	1.35183	0	-33	0	-33	22	394067	19	1.73947	3.39405	0.141821	hpRNA	dsim	8530425	wxd1_rep1
Dsim_2R:12515181-12515926	745	-18.3043	0.994094	0.653543	0.506138	21	0.230163	0.248334	22	-0.431303	528770	0.727517	2.8991	-363.1	1.04513	0	-33	0	-33	22	271351	27	2.03786	-33	0.382798	hpRNA	dsim	8530425	wxd1_rep1
Dsim_2R:12635745-12637273	1528	-41.7289	0.997954	0.5	0.391539	21	0.2451	0.2912	22	0.29927	134035	0.687173	2.28259	-632	1.90502	0	-33	0	-33	22	429016	19	1.37479	2.32748	0.153638	hpRNA	dsim	8530425	wxd1_rep1
Dsim_2R:12660186-12661916	1730	-40.8705	0.997469	0.5	0.390095	21	0.25905	0.33025	22	-0.0805243	110128	0.700578	2.16926	-689.9	1.69137	0	-33	0	-33	22	503977	19	1.85681	2.35047	0.147803	hpRNA	dsim	8530425	wxd1_rep1
Dsim_U_125:40789-42290	1501	-16.1212	0.978481	0.5	0.407781	21	0.33325	0.4696	23	-0.503156	33670.7	0.658228	2.50064	-443.1	1.5423	0	-33	0	-33	21.5	4886.56	20	2.45799	-33	0.0182897	hpRNA	dsim	8530425	wxd1_rep1
Dsim_X:15212013-15212189	176	-18.8197	0.998726	0.552749	0.397521	21	0.230729	0.303341	22	0.892697	6994212	0.886364	2.09649	-120.4	1.3739	0.901961	-1.05122	-66.7	2.12996	22	5154170	16	1.53302	-33	0.233886	hpRNA	dsim	8530425	wxd1_rep1
Dsim_X:16793436-16795658	2222	-30.7073	0.996765	0.617246	0.43056	21	0.27307	0.258873	22	0.669824	1612445	0.629163	2.181	-684.6	1.10948	0	-33	0	-33	21	1411561	12	1.334	-33	0.154962	hpRNA	dsim	8530425	wxd1_rep1
Dsim_X:22163470-22164501	1031	-42.3497	0.995527	0.5	0.518393	21	0.19195	0.21255	22	0.609074	227938	0.777886	2.45461	-690.3	0.364033	0	-33	0	-33	22	1552900	16	0.934213	1.64533	0.253543	hpRNA	dsim	8530425	wxd1_rep1
NT_033779.5:9788672-9790469	1797	-22.499	0.996144	0.995025	0.454647	21	0.0662687	0.321891	21	-0.115615	33.9294	0.704507	2.61044	-724.5	-33	0	-33	0	-33	21	1425.03	9	1.92202	-33	0.0347437	hpRNA	dmel	302516801	bonini_head_30d
NT_033779.5:9788611-9790511	1900	-37.0287	0.902986	0.915416	0.443966	21	0.296686	0.23636	22	-0.30515	5907.26	0.703158	3.00477	-748.7	1.43986	0	-33	0	-33	22	33979.8	30	2.84624	2.24348	0.0959799	hpRNA	dmel	204807195	ok_ovary_cs
NT_033779.5:9788672-9790469	1797	-37.0083	0.902983	0.915499	0.443981	21	0.296713	0.236382	22	0.025909	8469.26	0.704507	3.00478	-724.5	1.43986	0	-33	0	-33	22	33981.6	30	2.84624	2.24348	0.0959327	hpRNA	dmel	204807195	ok_ovary_cs
chr2L:9788611-9790511	1900	-23.3206	0.994217	0.998702	0.43644	21	0.291521	0.272745	21	-0.407958	471.943	0.703158	2.45264	-748.7	-33	0	-33	0	-33	22.3333	94.3886	22	1.91713	2.90856	0.101845	hpRNA	dmel	9708709	dcr2-het_rep1
chr2L:9788672-9790469	1797	-23.3071	0.994215	0.998801	0.43645	21	0.29145	0.272773	21	-0.426945	377.572	0.704507	2.47082	-724.5	-33	0	-33	0	-33	22.3333	94.3931	22	1.91713	2.90856	0.101803	hpRNA	dmel	9708709	dcr2-het_rep1
NT_037436.4:19423043-19424123	1080	-26.9593	0.999961	0.923446	0.606885	21	0.0756302	0.0205928	22	-0.29087	4940.97	0.674074	2.39137	-469.1	1.67641	0	-33	0	-33	22	14822.9	30	1.48964	-33	0.0917608	hpRNA	dmel	1426901019	male_M002
NT_037436.4:19477652-19478668	1016	-26.6352	0.999968	0.965344	0.604828	21	0.0650642	0.0190173	23	-0.350868	2186.95	0.692913	2.0879	-424.4	1.24922	0	-33	0	-33	22.5	13996.5	30	0.985372	-33	0.0892277	hpRNA	dmel	1426901019	male_M002
Dsim_3R:23613945-23615763	1818	-23.0557	0.999994	0.559229	0.519599	21	0.241047	0.260331	22	2.4175	668733	0.792079	2.54942	-1297.1	-0.398076	0	-33	0	-33	22.5	66804.4	23	1.11339	-33	0.434573	hpRNA	dsim	26521904	sz_129
HE587302:2348794-2349313	519	-16.6147	0.817151	0.518378	0.380649	25	0.397972	0.346008	27	-0.367949	41825.1	0.813102	2.71256	-280.5	0.164747	0	-33	0	-33	26	110266	18	2.29556	2.90856	0.318124	hpRNA	spidermite	2023667092	all_spidermite (SRR10513013-SRR10513019)
HE587302:3426024-3426693	669	-17.7224	0.816245	0.537939	0.398813	25	0.346546	0.224236	26	-0.267298	71347.7	0.723468	2.75999	-271	0.352437	0	-33	0	-33	26	96262.7	18	2.51237	2.0049	0.320498	hpRNA	spidermite	2023667092	all_spidermite (SRR10513013-SRR10513019)
HE587302:3433181-3433850	669	-17.9113	0.827726	0.575758	0.39262	25	0.31557	0.361546	27	-0.265397	65830.7	0.71151	2.75999	-249.8	-0.0875376	0	-33	0	-33	26	90909.1	18	2.29556	2.90856	0.30303	hpRNA	spidermite	2023667092	all_spidermite (SRR10513013-SRR10513019)
HE587302:5620385-5620966	581	-24.2429	0.754725	0.617983	0.332653	26	0.560018	0.202647	26	0.0745618	64354.2	0.843373	0.854527	-335.9	1.79463	0	-33	0	-33	27	344135	16	1.5412	0.764429	0.222273	hpRNA	spidermite	2023667092	all_spidermite (SRR10513013-SRR10513019)
HE587304:730959-731538	579	-24.5853	0.764219	0.631262	0.338314	26	0.304267	0.198516	26	-0.00275735	54267.2	0.835924	2.36569	-334.3	0.816497	0	-33	0	-33	26.5	561224	7	2.15778	2.90856	0.232839	hpRNA	spidermite	2023667092	all_spidermite (SRR10513013-SRR10513019)
HE587310:1723030-1723782	752	-21.0254	0.802429	0.506229	0.326455	26	0.372027	0.147792	27	0.125796	77576.4	0.736702	2.29856	-357.8	0.349782	0	-33	0	-33	26	849377	17	2.84747	1.88814	0.210079	hpRNA	spidermite	2023667092	all_spidermite (SRR10513013-SRR10513019)
HE587320:948440-949177	737	-16.4141	0.795852	0.530523	0.379677	25	0.306686	0.247093	27	-0.576234	34883.7	0.71099	2.66807	-281.7	0.156863	0	-33	0	-33	25.5	135174	18	2.83922	1.70122	0.361919	hpRNA	spidermite	2023667092	all_spidermite (SRR10513013-SRR10513019)
HE587322:968885-969604	719	-21.8285	0.793871	0.5029	0.433223	26	0.39402	0.311468	26	2.64888	237840	0.806676	1.66097	-390.9	-0.390137	0	-33	0	-33	26.5	308344	16	0.687306	2.90856	0.175368	hpRNA	spidermite	2023667092	all_spidermite (SRR10513013-SRR10513019)
HE587326:995146-995745	599	-40.237	0.7581	0.53227	0.393379	26	0.390471	0.285118	27	-0.424063	769742	0.864775	0.644107	-413.2	-0.49459	0	-33	0	-33	26.5	1331815	17	0.875721	1.05021	0.276576	hpRNA	spidermite	2023667092	all_spidermite (SRR10513013-SRR10513019)
HE587333:97595-98309	714	-21.3322	0.791994	0.511927	0.432651	26	0.399541	0.305046	26	2.64888	244495	0.80112	1.66141	-376.2	-0.359573	0	-33	0	-33	26.5	316972	16	1.42355	2.90856	0.170183	hpRNA	spidermite	2023667092	all_spidermite (SRR10513013-SRR10513019)
HE587335:516039-516562	523	-16.8606	0.794096	0.535302	0.382767	25	0.324775	0.24647	27	-0.528878	29525	0.75717	2.16052	-241.2	-0.156863	0	-33	0	-33	25.5	157895	18	2.92207	1.51962	0.32991	hpRNA	spidermite	2023667092	all_spidermite (SRR10513013-SRR10513019)
HE587302:2348794-2349313	519	-16.6147	0.817151	0.518378	0.380649	25	0.397972	0.346008	27	-0.367949	41825.1	0.813102	2.71256	-280.5	0.164747	0	-33	0	-33	26	110266	18	2.29556	2.90856	0.318124	hpRNA	spidermite	2023667092	all_spidermite (SRR10513013-SRR10513019)
HE587302:3426024-3426693	669	-17.7224	0.816245	0.537939	0.398813	25	0.346546	0.224236	26	-0.267298	71347.7	0.723468	2.75999	-271	0.352437	0	-33	0	-33	26	96262.7	18	2.51237	2.0049	0.320498	hpRNA	spidermite	2023667092	all_spidermite (SRR10513013-SRR10513019)
HE587302:3433181-3433850	669	-17.9113	0.827726	0.575758	0.39262	25	0.31557	0.361546	27	-0.265397	65830.7	0.71151	2.75999	-249.8	-0.0875376	0	-33	0	-33	26	90909.1	18	2.29556	2.90856	0.30303	hpRNA	spidermite	2023667092	all_spidermite (SRR10513013-SRR10513019)
HE587302:5620385-5620966	581	-24.2429	0.754725	0.617983	0.332653	26	0.560018	0.202647	26	0.0745618	64354.2	0.843373	0.854527	-335.9	1.79463	0	-33	0	-33	27	344135	16	1.5412	0.764429	0.222273	hpRNA	spidermite	2023667092	all_spidermite (SRR10513013-SRR10513019)
HE587304:730959-731538	579	-24.5853	0.764219	0.631262	0.338314	26	0.304267	0.198516	26	-0.00275735	54267.2	0.835924	2.36569	-334.3	0.816497	0	-33	0	-33	26.5	561224	7	2.15778	2.90856	0.232839	hpRNA	spidermite	2023667092	all_spidermite (SRR10513013-SRR10513019)
HE587310:1723030-1723782	752	-21.0254	0.802429	0.506229	0.326455	26	0.372027	0.147792	27	0.125796	77576.4	0.736702	2.29856	-357.8	0.349782	0	-33	0	-33	26	849377	17	2.84747	1.88814	0.210079	hpRNA	spidermite	2023667092	all_spidermite (SRR10513013-SRR10513019)
HE587320:948440-949177	737	-16.4141	0.795852	0.530523	0.379677	25	0.306686	0.247093	27	-0.576234	34883.7	0.71099	2.66807	-281.7	0.156863	0	-33	0	-33	25.5	135174	18	2.83922	1.70122	0.361919	hpRNA	spidermite	2023667092	all_spidermite (SRR10513013-SRR10513019)
HE587322:968885-969604	719	-21.8285	0.793871	0.5029	0.433223	26	0.39402	0.311468	26	2.64888	237840	0.806676	1.66097	-390.9	-0.390137	0	-33	0	-33	26.5	308344	16	0.687306	2.90856	0.175368	hpRNA	spidermite	2023667092	all_spidermite (SRR10513013-SRR10513019)
HE587326:995146-995745	599	-40.237	0.7581	0.53227	0.393379	26	0.390471	0.285118	27	-0.424063	769742	0.864775	0.644107	-413.2	-0.49459	0	-33	0	-33	26.5	1331815	17	0.875721	1.05021	0.276576	hpRNA	spidermite	2023667092	all_spidermite (SRR10513013-SRR10513019)
HE587333:97595-98309	714	-21.3322	0.791994	0.511927	0.432651	26	0.399541	0.305046	26	2.64888	244495	0.80112	1.66141	-376.2	-0.359573	0	-33	0	-33	26.5	316972	16	1.42355	2.90856	0.170183	hpRNA	spidermite	2023667092	all_spidermite (SRR10513013-SRR10513019)
HE587335:516039-516562	523	-16.8606	0.794096	0.535302	0.382767	25	0.324775	0.24647	27	-0.528878	29525	0.75717	2.16052	-241.2	-0.156863	0	-33	0	-33	25.5	157895	18	2.92207	1.51962	0.32991	hpRNA	spidermite	2023667092	all_spidermite (SRR10513013-SRR10513019)
Scaffold147:6354676-6355543	867	-66.1976	0.999992	0.657027	0.415959	22	0.550126	0.179533	23	0.780494	24994613	0.908881	2.16257	-606.1	1.82409	0	-33	0	-33	23	10531579	20	-0.46091	0.865895	0.064591	hpRNA	whitefly	1390651722	all.bam
Scaffold147:6354689-6355538	849	-66.0766	0.999992	0.657011	0.415967	22	0.550153	0.179513	23	0.780494	24995807	0.923439	2.20359	-598.9	1.89208	0	-33	0	-33	23	10532082	20	-0.46091	0.865895	0.064575	hpRNA	whitefly	1390651722	all.bam
Scaffold161:1164004-1164344	340	-41.3289	1	0.642466	0.375376	22	0.72868	0.0714163	22	-0.405711	329514	0.858823	1.67232	-195.1	0.449467	0	-33	0	-33	23	2169479	20	0.161324	2.83422	0.0264748	hpRNA	whitefly	1390651722	all.bam
Scaffold18098:26810-27538	728	-51.2977	0.990507	0.507001	0.561298	22	0.276645	0.187985	23	0.561123	4302909	0.848901	1.98838	-599.2	-0.0331679	0	-33	0	-33	23	4629471	7	0.505703	1.32007	0.166655	hpRNA	whitefly	1390651722	all.bam
Scaffold637:1455141-1456241	1100	-64.762	0.987191	0.585649	0.47749	22	0.343327	0.280031	23	0.461432	12835652	0.918182	2.44149	-983.6	-0.108908	0	-33	0	-33	23	13151675	25	0.517938	0.463376	0.131416	hpRNA	whitefly	1390651722	all.bam
NC_004353.4:626143-626202	59	-0.752299	0.967101	0.994286	0.497837	23	0.914286	0.0971429	20	-0.333333	0	0.711864	1.75757	-24.8	1.53748	0.711864	-0.393885	-24.8	0.772407	-33	-33	-33	2.41115	-33	0.102857	miRNA	dmel	283063946	bonini_head_3d_wt SRR1042403
NC_004354.4:15508971-15509039	68	-0.770678	0.870681	0.996791	0.308647	22	0.658824	0.375401	24.5	-33	0	0.676471	2.7923	-21.3	0.952381	0.676471	-0.100263	-21.3	1.40892	-33	-33	-33	2.71163	-33	0.0192513	miRNA	dmel	283063946	bonini_head_3d_wt SRR1042404
NC_004354.4:15509460-15509543	83	-3.40908	0.987425	0.9997	0.370351	20	0.994802	0.00229931	21	-0.47266	0	0.674699	2.13741	-26.6	1.42134	0.674699	-0.41555	-26.6	1.66464	-33	-33	-33	-33	-33	0.00177448	miRNA	dmel	283063946	bonini_head_3d_wt SRR1042405
NC_004354.4:1788876-1788941	65	-2.05431	0.999241	0.997307	0.511843	22	0.554603	9.97307e-05	19	-33	0	0.523077	2.19832	-13.7	-33	0.53125	-33	-13.7	-33	-33	-33	-33	-33	-33	0.000156138	miRNA	dmel	283063946	bonini_head_3d_wt SRR1042406
NC_004354.4:1788877-1788941	64	-2.05431	0.999241	0.997307	0.511843	22	0.554603	9.97307e-05	19	-33	0	0.53125	2.19832	-13.7	-33	0.53125	-33	-13.7	-33	-33	-33	-33	-33	-33	0.000156138	miRNA	dmel	283063946	bonini_head_3d_wt SRR1042407
NC_004354.4:18124357-18124441	84	-0.721689	1	0.998452	0.473841	21	0.0108359	0.0154799	24.5	-33	0	0.5	1.76824	-21.3	-33	0.5	-33	-21.3	-33	-33	-33	-33	3.19256	-33	0.0309598	miRNA	dmel	283063946	bonini_head_3d_wt SRR1042408
NC_004354.4:19558899-19558977	78	-0.0174778	0.936294	0.986301	0.354309	23	0.958904	0	24.5	-33	0	0.487179	1.96245	-27.2	-33	0.487179	-33	-27.2	-33	-33	-33	-33	-33	-33	0.0821918	miRNA	dmel	283063946	bonini_head_3d_wt SRR1042409
NC_004354.4:4368328-4368385	57	-0.807009	0.959216	0.941667	0.272902	21	0.133333	0.408333	24.5	-33	0	0.561404	2.54748	-12.1	-33	0.631579	-33	-13.9	-33	-33	-33	-33	-33	-33	0.0666667	miRNA	dmel	283063946	bonini_head_3d_wt SRR1042410
NC_004354.4:4368507-4368564	57	-0.807009	0.959216	0.941667	0.272902	21	0.133333	0.408333	24.5	-33	0	0.561404	2.54748	-12.1	-33	0.631579	-33	-13.9	-33	-33	-33	-33	-33	-33	0.0666667	miRNA	dmel	283063946	bonini_head_3d_wt SRR1042411
NC_004354.4:569926-569988	62	-0.157297	0.974078	0.987805	0.625462	21	0	0	24.5	-33	0	0.612903	2.32397	-25	-0.471405	0.612903	1.40269	-25	1.90657	-33	-33	-33	-33	-33	0.109756	miRNA	dmel	283063946	bonini_head_3d_wt SRR1042412
NT_033777.3:15417761-15417827	66	-2.75406	0.888927	0.9999	0.458256	20	0.311769	0.049795	24.5	-33	0	0	2.48166	-15.9	-33	0.626866	-0.453058	-15.9	1.1134	19.8	81.1096	11	0.415078	-33	0.00198718	miRNA	dmel	283063946	bonini_head_3d_wt SRR1042413
NT_033777.3:20735939-20735998	59	-0.885496	1	0.9998	0.477471	21	0.997601	0.9985	24.5	-33	0	0.745763	1.72441	-29	0.298142	0.745763	2.66597	-29	1.54305	-33	-33	-33	-33	-33	0.00019039	miRNA	dmel	283063946	bonini_head_3d_wt SRR1042414
NT_033778.4:9621261-9621328	67	-1.53288	0.999891	0.995025	0.54295	21	0.0738309	0.85602	19	-0.476297	0	0.567164	2.25657	-26.7	-33	0.567164	2.06518	-26.7	2.62263	-33	-33	-33	1.69457	-33	0.00265094	miRNA	dmel	283063946	bonini_head_3d_wt SRR1042415
NT_037436.4:19565141-19565201	60	-1.26393	0.998271	0.9999	0.347716	23	0.9983	0.992801	24.5	-33	0	0.666667	1.83193	-22.2	1.89737	0.655738	-0.476656	-22.2	0.0712431	-33	-33	-33	2.32737	-33	0.000214253	miRNA	dmel	283063946	bonini_head_3d_wt SRR1042416
chr2R:20583718-20583788	70	-6.45553	0.998077	0.9999	0.511122	22	0.145485	0.385261	21	-0.334399	0	0	2.43839	-12.9	-33	0	-33	0	-33	-33	-33	-33	-33	-33	0.0218075	miRNA	dmel	9708709	dcr2-het_rep1
chr2R:20583763-20583826	63	-6.79075	0.998134	0.9999	0.511346	22	0.147585	0.382962	21	-0.333851	0	0	2.38826	-18.1	-33	0.444444	-0.16589	-18.1	2.23869	-33	-33	-33	1.74963	-33	0.0228244	miRNA	dmel	9708709	dcr2-het_rep1
chr2R:20584056-20584118	62	-6.65296	0.998384	0.9998	0.498752	22	0.404319	0.034893	22	-0.334472	0	0	2.22629	-18.7	-33	0.633333	-0.0834951	-18.7	2.20076	-33	-33	-33	1.64533	-33	0.0343234	miRNA	dmel	9708709	dcr2-het_rep1
chr2R:20584058-20584118	60	-6.65296	0.998384	0.9998	0.498752	22	0.404319	0.034893	22	-0.334472	0	0	2.22629	-18.7	-33	0.633333	-0.0834951	-18.7	2.20076	-33	-33	-33	1.64533	-33	0.0343234	miRNA	dmel	9708709	dcr2-het_rep1
chr3L:11656935-11657005	70	-6.17776	0.999198	0.9999	0.496862	22	0.992601	0.00949905	21	-0.333628	0	0.742857	2.3144	-24.8	1.81479	0.753623	-0.507643	-24.8	2.0546	-33	-33	-33	0.301041	-33	0.0275519	miRNA	dmel	9708709	dcr2-het_rep1
chr3L:19565139-19565202	63	-8.59245	0.998878	0.9999	0.352251	22	0.967403	0.886611	24.5	-0.333333	0	0.634921	2.36206	-22.3	1.8092	0.625	-0.0443737	-22.3	1.80263	-33	-33	-33	0.479262	-33	0.0242049	miRNA	dmel	9708709	dcr2-het_rep1
chr3L:21668728-21668792	64	-4.41402	0.993884	0.999813	0.470884	22	0.0263798	0.094855	24.5	-0.333333	0	0	2.75738	-17.4	-33	0.571429	0.0987899	-17.4	2.54703	-33	-33	-33	2.22348	-33	0.0344247	miRNA	dmel	9708709	dcr2-het_rep1
chr3L:3251038-3251104	66	-11.2109	0.999998	0.9997	0.461142	22	0.954314	0.0361891	21	-0.144721	11301.5	0.636364	1.94485	-29.4	1.51396	0.636364	-0.367762	-29.4	2.17385	-33	-33	-33	0.304968	-33	0.0135047	miRNA	dmel	9708709	dcr2-het_rep1
chr3L:642182-642282	100	-10.7262	0.999923	0.9997	0.322992	21	0.974208	0.00109967	22	-0.333333	0	0.6	1.87311	-23.8	1.0328	0.666667	0.474567	-21.7	1.8276	-33	-33	-33	2.77595	-33	0.010581	miRNA	dmel	9708709	dcr2-het_rep1
chr3L:642223-642284	61	-10.7262	0.999923	0.9997	0.322992	21	0.974208	0.00109967	22	-0.333333	0	0.688525	1.87311	-21.3	0.626801	0.688525	0.67972	-21.3	1.85417	-33	-33	-33	2.77595	-33	0.010581	miRNA	dmel	9708709	dcr2-het_rep1
chr3R:10091140-10091230	90	-8.71748	0.98579	0.9998	0.509167	21	0.990702	0.00169966	20	-0.482779	119.481	0.711111	2.68275	-29.9	0.549972	0.232558	-33	0	-33	-33	-33	-33	1.86487	1.64533	0.0129339	miRNA	dmel	9708709	dcr2-het_rep1
chr3R:10091182-10091242	60	-8.1248	0.985019	0.9998	0.507672	21	0.989902	0.00059988	20	-0.485398	30.5036	0.433333	2.68208	-12.7	-33	0	-33	0	-33	-33	-33	-33	-33	-33	0.0119879	miRNA	dmel	9708709	dcr2-het_rep1
chr3R:10100951-10101027	76	-11.3287	0.984764	0.9997	0.540207	21	0.896131	0.00769769	20	-0.333627	0	0.684211	2.73009	-29.5	0.847414	0.666667	1.18797	-29.5	2.33976	-33	-33	-33	1.25374	-33	0.0137804	miRNA	dmel	9708709	dcr2-het_rep1
chr3R:16856278-16856340	62	-2.21434	0.997265	0.916667	0.36803	22	0.0261194	0.0298507	21	0.321578	29850.8	0.677419	2.68467	-23.3	1.1547	0.701754	0.828219	-23.3	2.03891	-33	-33	-33	2.58705	-33	0.0808458	miRNA	dmel	9708709	dcr2-het_rep1
chr3R:16856280-16856340	60	-2.21434	0.997265	0.916667	0.36803	22	0.0261194	0.0298507	21	0.321578	29850.8	0.7	2.68467	-23.3	1.1547	0.701754	0.828219	-23.3	2.03891	-33	-33	-33	2.58705	-33	0.0808458	miRNA	dmel	9708709	dcr2-het_rep1
chr3R:29215633-29215674	41	-5.49622	0.995456	0.9999	0.38457	21	0.986401	0.00409959	21	-0.331068	99.1572	0.439024	2.69557	NA	-33	0	-33	0	-33	-33	-33	-33	-33	-33	0.0226078	miRNA	dmel	9708709	dcr2-het_rep1
chrX:14555664-14555753	89	-1.48767	0.856434	0.958333	0.399989	25	0.916667	0.0416667	24.5	-33	0	0.516854	0.935629	-17.2	-33	0.680412	-33	-23.7	-33	25	83333.3	12	0.0747194	-33	0.833333	miRNA	dmel	9708709	dcr2-het_rep1
chrX:15508970-15509038	68	-14.404	0.999925	0.9998	0.244503	23	0.987103	0.00829834	22	-0.473264	98.8854	0.705882	1.86977	-22.1	0.604202	0.705882	-0.022307	-22.1	1.18663	-33	-33	-33	2.02751	-33	0.00728927	miRNA	dmel	9708709	dcr2-het_rep1
chrX:15509479-15509544	65	-9.62876	0.999649	0.9997	0.390132	22	0.982105	0.00889733	23	-0.366677	0	0.646154	2.35418	-21.7	1.35873	0.716418	0.504985	-24.5	1.8642	-33	-33	-33	2.19913	-33	0.0090611	miRNA	dmel	9708709	dcr2-het_rep1
chrX:19561235-19561316	81	-7.5215	0.999016	0.999871	0.501061	22	0.534632	0.00116084	22	-0.493709	0	0.617284	2.60315	-28.5	0.832294	0.625	1.24974	-27.7	2.28946	-33	-33	-33	0.886659	-33	0.036502	miRNA	dmel	9708709	dcr2-het_rep1
chrX:19561251-19561313	62	-7.5215	0.999016	0.999871	0.501061	22	0.534632	0.00116084	22	-0.493709	0	0.645161	2.60315	-23.3	0.832294	0.625	1.24974	-27.7	2.28946	-33	-33	-33	0.886659	-33	0.036502	miRNA	dmel	9708709	dcr2-het_rep1
chrX:19561251-19561316	65	-7.5215	0.999016	0.999871	0.501061	22	0.534632	0.00116084	22	-0.493709	0	0.615385	2.60315	-23.3	0.832294	0.625	1.24974	-27.7	2.28946	-33	-33	-33	0.886659	-33	0.036502	miRNA	dmel	9708709	dcr2-het_rep1
chrX:4365821-4365886	65	-3.50242	0.999148	0.999295	0.304686	22	0.584626	0.478491	24.5	-33	0	0	1.59411	-15.8	-33	0.686567	1.59726	-16	1.37918	-33	-33	-33	-0.22454	1.64533	0.0606488	miRNA	dmel	9708709	dcr2-het_rep1
chrX:8993338-8993421	83	-3.66064	0.99294	0.999028	0.483157	22	0.276554	0.162565	22	-0.0460299	48899	0.240964	2.62954	-11.3	-33	0.418605	-33	0	-33	-33	-33	-33	2.12811	-33	0.0414508	miRNA	dmel	9708709	dcr2-het_rep1
Dsim_2L:1015823-1015886	63	-15.6336	0.999982	0.9999	0.341414	21	0.990101	0.00579942	24.5	-33	0	0.634921	2.00307	-22.8	1.67652	0.634921	-0.354756	-22.8	1.91752	-33	-33	-33	2.20461	-33	0.0148515	miRNA	dsim	8530425	wxd1_rep1
Dsim_2L:16624343-16624416	73	-8.68504	0.991833	0.997734	0.353322	22	0.97876	0.138771	19	2.47626	346644	0.60274	2.54611	-18.8	1.70472	0.60274	-0.296746	-18.8	2.00991	-33	-33	-33	0.516186	-33	0.0427641	miRNA	dsim	8530425	wxd1_rep1
Dsim_2L:16624345-16624429	84	-8.68504	0.991833	0.997734	0.353322	22	0.97876	0.138771	19	2.47626	346644	0.595238	2.54611	-20.5	1.70472	0.60274	-0.296746	-18.8	2.00991	-33	-33	-33	0.516186	-33	0.0427641	miRNA	dsim	8530425	wxd1_rep1
Dsim_2L:16625244-16625287	43	-2.45248	0.999919	0.997175	0.310517	22	0.971751	0.971751	24.5	-33	0	0.372093	1.82499	NA	-33	0.419355	-33	0	-33	-33	-33	-33	2.71163	-33	0.0706215	miRNA	dsim	8530425	wxd1_rep1
Dsim_2L:17494611-17494678	67	-1.48532	0.975155	0.977612	0.548616	21	0.932836	0.00746269	24.5	-33	0	0.686567	2.31441	-26.9	1.33333	0.686567	-0.51462	-26.9	2.09081	-33	-33	-33	1.84124	-33	0.253731	miRNA	dsim	8530425	wxd1_rep1
Dsim_2L:18402307-18402386	79	-13.7891	0.999881	0.9999	0.388655	21	0.970003	0.966003	19	2.66667	73.6784	0.582279	1.95045	-24.1	1.59427	0.54945	-0.376464	-26.4	1.63831	-33	-33	-33	-0.0214205	-33	0.018788	miRNA	dsim	8530425	wxd1_rep1
Dsim_2L:19507820-19507888	68	-12.8865	0.999167	0.9999	0.489247	23	0.122688	0.640536	25	0.0266667	101.736	0	2.79641	-29.7	-33	0.735294	-0.585963	-29.7	1.35292	-33	-33	-33	1.03119	-33	0.0311652	miRNA	dsim	8530425	wxd1_rep1
Dsim_2L:20366622-20366693	71	-11.9245	1	0.999201	0.358825	22	0.982714	0.98771	22	-0.416667	0	0.732394	2.45471	-25.4	1.65119	0.732394	-0.425193	-25.4	1.61271	-33	-33	-33	1.96555	-33	0.0249678	miRNA	dsim	8530425	wxd1_rep1
Dsim_2L:20366623-20366686	63	-11.9245	1	0.999201	0.358825	22	0.982714	0.98771	22	-0.416667	0	0.730159	2.45471	-23.3	1.65119	0.732394	-0.425193	-25.4	1.61271	-33	-33	-33	1.96555	-33	0.0249678	miRNA	dsim	8530425	wxd1_rep1
Dsim_2L:5731482-5731540	58	-3.7191	0.969088	0.990892	0.378037	21	0.774135	0.00182149	19	-0.333333	0	0.344828	3.02805	NA	-33	0.580645	-33	0	-33	-33	-33	-33	1.64533	-33	0.125683	miRNA	dsim	8530425	wxd1_rep1
Dsim_2L:5731510-5731591	81	-5.59382	0.961077	0.9964	0.405536	21	0.885689	0.00270027	24.5	-33	0	0.567901	2.68499	-16.7	-33	0.565217	-33	-22	-33	-33	-33	-33	1.54288	-33	0.122412	miRNA	dsim	8530425	wxd1_rep1
Dsim_2L:5731864-5731928	64	-6.94214	0.979098	0.999483	0.300033	22	0.0100801	0.953476	24.5	-33	0	0.5625	2.43686	-17.2	1.24722	0.553846	-0.210716	-17.2	1.35387	20.3333	516.929	11	1.24035	-33	0.0553114	miRNA	dsim	8530425	wxd1_rep1
Dsim_2L:5732534-5732596	62	-13.9472	0.998355	0.992591	0.322862	24	0.00390678	0.982891	24.5	-33	0	0.612903	2.4565	-15	1.44002	0.623377	-0.421376	-17.7	-0.167625	-33	-33	-33	2.23479	-33	0.0417621	miRNA	dsim	8530425	wxd1_rep1
Dsim_2L:5732552-5732608	56	-13.8826	0.998439	0.992583	0.322851	24	0.00391099	0.982873	24.5	-33	0	0.607143	2.41783	NA	-33	0.623377	-0.418745	-17.7	-0.167492	-33	-33	-33	2.23479	-33	0.0416723	miRNA	dsim	8530425	wxd1_rep1
Dsim_2L:5732656-5732740	84	-9.08726	0.999887	0.999698	0.38125	22	0.942374	0.0773872	24.5	-0.333333	0	0.547619	1.89723	-21.4	1.39206	0.673913	-0.575375	-26.5	2.24568	-33	-33	-33	0.655386	-33	0.0392216	miRNA	dsim	8530425	wxd1_rep1
Dsim_2L:7516056-7516127	71	-14.2953	0.999539	0.998303	0.430217	22	0.0184686	0.0103824	22	2.63651	20605.3	0.676056	2.13935	-25.4	-0.215675	0.689655	2.58691	-26	2.04367	-33	-33	-33	1.4088	-33	0.01662	miRNA	dsim	8530425	wxd1_rep1
Dsim_2L:7516058-7516116	58	-14.2984	0.999496	0.998303	0.430269	22	0.0180693	0.0102825	22	2.63636	20606	0.689655	2.13659	-23.1	-0.134386	0.689655	2.60039	-25.4	2.04488	-33	-33	-33	1.4088	-33	0.0165857	miRNA	dsim	8530425	wxd1_rep1
Dsim_2L:8326979-8327062	83	-10.9805	0.995008	0.9997	0.490495	23	0.083375	0.620614	24.5	-33	0	0.674699	2.78353	-23.5	-33	0.666667	-0.341979	-23.5	1.22981	21	72.9954	NA	1.32776	-33	0.0244169	miRNA	dsim	8530425	wxd1_rep1
Dsim_2R:10307508-10307580	72	-18.8961	0.99989	0.9998	0.450847	23	0.0117976	0.216357	24.5	-33	0	0	1.2332	-21	-33	0.520548	-0.521578	-21	0.574515	21.5	54125.8	12	0.0970587	-33	0.0256793	miRNA	dsim	8530425	wxd1_rep1
Dsim_2R:10307521-10307585	64	-18.8961	0.99989	0.9998	0.450847	23	0.0117976	0.216357	24.5	-33	0	0	1.2332	NA	-33	0.535211	-0.512122	-21	0.571365	21.5	54374.9	12	0.0970587	-33	0.0256793	miRNA	dsim	8530425	wxd1_rep1
Dsim_2R:10307726-10307797	71	-18.4362	0.99938	0.9999	0.45133	23	0.0131987	0.218978	24.5	-0.333333	0	0	1.27027	-22.7	-33	0.542857	-0.519649	-22.7	0.57923	-33	-33	-33	1.32393	-33	0.0237772	miRNA	dsim	8530425	wxd1_rep1
Dsim_2R:14147205-14147266	61	-1.09981	0.994142	0.990476	0.363446	22	0.0571429	0.0571429	24.5	-33	0	0	2.89952	-19.4	-33	0.754098	-0.333333	-19.4	1.54917	-33	-33	-33	-33	-33	0.1	miRNA	dsim	8530425	wxd1_rep1
Dsim_2R:15850979-15851048	69	-6.40855	0.997309	0.999817	0.525479	21	0.223098	0.208066	24.5	-33	0	0	2.24306	-15.9	-33	0.463768	-0.282708	-15.9	1.83373	-33	-33	-33	-33	-33	0.0427131	miRNA	dsim	8530425	wxd1_rep1
Dsim_2R:18611124-18611200	76	-7.55654	0.992274	0.999187	0.486681	22	0.499323	0.174749	24.5	-33	0	0.552632	2.9647	-15.8	-0.333333	0.511628	-0.471699	-16.7	1.53403	-33	-33	-33	1.03499	-33	0.0636684	miRNA	dsim	8530425	wxd1_rep1
Dsim_2R:18633396-18633461	65	-8.87692	0.984664	0.999498	0.350905	24	0.97902	0.978895	24.5	-33	0	0.646154	2.73274	-16.9	0.464351	0.646154	2.00484	-16.9	0.472839	20.5	8291.46	9	1.53637	-33	0.0437186	miRNA	dsim	8530425	wxd1_rep1
Dsim_2R:18633430-18633480	50	-1.45736	0.955868	0.934211	0.326506	21	0.0394737	0.0394737	24.5	-33	0	0.56	2.89405	NA	-33	0.56	-33	0	-33	20.5	868421	9	-33	-33	0.276316	miRNA	dsim	8530425	wxd1_rep1
Dsim_2R:5071757-5071818	61	-2.4196	0.996271	0.993333	0.600255	22	0.01	0.906667	24.5	-0.333333	0	0	2.71555	-14.3	-33	0.390244	-33	0	-33	21	866667	18.5	-33	-33	0.13	miRNA	dsim	8530425	wxd1_rep1
Dsim_3L:10185934-10186000	66	-16.8497	1	0.9998	0.469882	22	0.936213	0.00739852	24.5	-33	0	0.69697	1.57005	-31.8	2.05739	0.606061	-0.342837	-28.2	1.5495	-33	-33	-33	1.22745	-33	0.0158874	miRNA	dsim	8530425	wxd1_rep1
Dsim_3L:10186001-10186048	47	-4.24416	0.666798	0.555556	0.350077	18	0.222222	0.666667	24.5	-0.471405	0	0.12766	2.48331	NA	-33	0.369231	-33	0	-33	-33	-33	-33	-33	-33	1	miRNA	dsim	8530425	wxd1_rep1
Dsim_3L:11587784-11587853	69	-3.94343	0.997512	0.988426	0.479217	24	0.0532407	0.215278	22	-0.344261	0	0.521739	2.89528	-13.4	-33	0.521739	-33	-13.4	-33	-33	-33	-33	0.450708	-33	0.199074	miRNA	dsim	8530425	wxd1_rep1
Dsim_3L:19342386-19342454	68	-10.9381	0.998825	0.997506	0.35581	21	0.952918	0.861047	20	0.757262	45332.3	0.588235	2.71871	-22.3	1.79934	0.606061	-0.334269	-22.3	1.59227	-33	-33	-33	0.10405	-33	0.0282009	miRNA	dsim	8530425	wxd1_rep1
Dsim_3L:3219800-3219890	90	-19.4449	1	0.9998	0.466429	22	0.94861	0.0382923	24.5	-33	0	0.533333	1.81812	-34.7	2.28579	0.676056	-0.336759	-34.7	1.5435	-33	-33	-33	0.884359	-33	0.0120931	miRNA	dsim	8530425	wxd1_rep1
Dsim_3L:3219815-3219863	48	-19.4337	1	0.9998	0.466433	22	0.94911	0.0388922	24.5	-33	0	0.5	1.74348	-16.3	2.66667	0.676056	-0.338392	-34.7	1.54379	-33	-33	-33	0.884359	-33	0.0120443	miRNA	dsim	8530425	wxd1_rep1
Dsim_3L:673625-673685	60	-26.8276	0.984037	0.9997	0.321644	23	0.972908	0.00389883	19	-0.333333	0	0.7	2.90856	-21.3	2.11471	0.677419	-0.354447	-21.7	-0.0820023	20.5	93.1723	15.5	2.66849	-33	0.00942904	miRNA	dsim	8530425	wxd1_rep1
Dsim_3L:673636-673680	44	-26.8276	0.984037	0.9997	0.321644	23	0.972908	0.00389883	19	-0.333333	0	0.5	2.90856	NA	-33	0.65625	-0.353854	-21.7	-0.0794169	20.5	111.807	19	2.66849	-33	0.00942904	miRNA	dsim	8530425	wxd1_rep1
Dsim_3R:13212676-13212746	70	-2.74902	0.999874	0.998958	0.536641	22	0.0635417	0.904167	19	2.66667	1041.67	0.657143	2.1992	-24.5	1.4792	0.657143	-0.134978	-24.5	1.69454	-33	-33	-33	2.93253	-33	0.0885417	miRNA	dsim	8530425	wxd1_rep1
Dsim_3R:21426494-21426552	58	-3.01755	0.995014	0.95585	0.304607	22	0.909492	0.0632818	20	-0.285554	27961.7	0.689655	2.36632	-16.1	1.48814	0.689655	1.33276	-16.1	2.14551	-33	-33	-33	-33	-33	0.0728477	miRNA	dsim	8530425	wxd1_rep1
Dsim_3R:22418865-22418956	91	-3.55176	0.998097	0.995827	0.556613	22	0.015299	0.299026	24.5	-33	0	0.593407	2.9647	-22.7	2.20682	0.593407	-0.31698	-22.7	1.58062	21.5	2781.64	30	2.0938	-33	0.100139	miRNA	dsim	8530425	wxd1_rep1
Dsim_3R:25898212-25898297	85	-11.2041	0.995629	0.9999	0.39461	20	0.987601	0.00259974	24.5	-33	0	0.658824	2.45038	-26.2	0.963998	0.4	-33	0	-33	-33	-33	-33	2.14355	-33	0.0212242	miRNA	dsim	8530425	wxd1_rep1
Dsim_3R:5063565-5063628	63	-15.7815	0.999983	0.9999	0.467798	22	0.0114988	0.00169983	24.5	-33	0	0.603175	2.10182	-21.3	0.525509	0.603175	2.50314	-21.3	1.61444	-33	-33	-33	-33	-33	0.01329	miRNA	dsim	8530425	wxd1_rep1
Dsim_3R:5064102-5064205	103	-4.7603	0.999888	0.982857	0.472183	21	0.84	0.0291429	24.5	-33	0	0.621359	1.94891	-30	-1.05409	0.621359	-0.347679	-30	1.58563	-33	-33	-33	-33	-33	0.0674286	miRNA	dsim	8530425	wxd1_rep1
Dsim_3R:7363894-7363990	96	-2.56578	0.839693	0.850909	0.474908	18	0.0545455	0.0290909	19	-33	0	0.541667	2.83935	-18.7	-33	0.541667	-33	-18.7	-33	-33	-33	-33	-33	-33	0.207273	miRNA	dsim	8530425	wxd1_rep1
Dsim_3R:9843807-9843887	80	-6.21108	0.999775	0.979116	0.350966	22	0.928952	0.036036	22	0.623566	184889	0.7	2.7706	-28.2	0.77392	0.730159	1.60119	-23.2	1.80488	19	409.5	20	2.22532	-33	0.0440213	miRNA	dsim	8530425	wxd1_rep1
Dsim_3R:9843807-9843888	81	-6.21108	0.999775	0.979116	0.350966	22	0.928952	0.036036	22	0.623566	184889	0.716049	2.7706	-30.8	0.77392	0.730159	1.60119	-23.2	1.80488	19	409.5	20	2.22532	-33	0.0440213	miRNA	dsim	8530425	wxd1_rep1
Dsim_X:15012296-15012385	89	-8.77712	0.978774	0.999871	0.357758	22	0.0236839	0.0102973	24.5	-33	0	0.539326	2.53501	-23.2	1.22474	0.449438	-0.227072	-20.1	1.02973	-33	-33	-33	0.428731	-33	0.0417042	miRNA	dsim	8530425	wxd1_rep1
Dsim_X:15013292-15013362	70	-32.6422	0.897804	0.9999	0.221927	19	0.952005	0.0421958	19	-0.71492	0	0.714286	1.79173	-22.5	1.65406	0.760563	-0.472851	-22.9	-0.0927631	-33	-33	-33	0.245916	-33	0.00646331	miRNA	dsim	8530425	wxd1_rep1
Dsim_X:15013808-15013873	65	-26.8599	0.989613	0.9999	0.392226	23	0.980502	0.0105989	24.5	-33	0	0.646154	2.34733	-23.6	2.01815	0.636364	-0.385557	-23.6	1.02488	20.5	54.1575	12	1.90128	-33	0.00650191	miRNA	dsim	8530425	wxd1_rep1
Dsim_X:19068556-19068636	80	-3.28261	0.975424	0.998002	0.489564	21	0.00899101	0.663337	24.5	-0.366295	0	0.625	1.89904	-32.5	1.88264	0.631579	0.829266	-32.5	1.52206	-33	-33	-33	-33	-33	0.0949051	miRNA	dsim	8530425	wxd1_rep1
Dsim_X:19069856-19069935	79	-12.7297	0.999996	0.998822	0.244432	22	0.897187	0.0378554	23	-33	0	0.683544	1.64533	-24.8	1.34356	0.714286	-33	-21	-33	20	441.891	19	0.382851	-33	0.0384445	miRNA	dsim	8530425	wxd1_rep1
Dsim_X:19070784-19070845	61	-14.9663	0.99987	0.999861	0.348546	22	0.986696	0.0022173	24.5	-33	0	0.688525	2.15957	-18.1	1.89263	0.688525	-0.449292	-18.1	1.68208	-33	-33	-33	1.74357	-33	0.0371397	miRNA	dsim	8530425	wxd1_rep1
Dsim_X:19073066-19073149	83	-4.11446	0.998127	0.997067	0.50017	22	0.646139	0.00782014	24.5	-33	0	0.722892	2.54748	-34.3	0.784799	0.722892	0.215769	-34.3	2.09087	21.5	1955.03	11	0.660246	1.64533	0.11828	miRNA	dsim	8530425	wxd1_rep1
Dsim_X:23045300-23045353	53	-10.2559	0.992774	0.997927	0.264674	23	0.0970149	0.411277	23	-0.455506	3316.75	0.188679	2.92784	NA	-33	0.633663	-1.12177	-10.8	1.60859	21	121683	26	1.20029	2.29556	0.110075	miRNA	dsim	8530425	wxd1_rep1
Dsim_X:23078593-23078696	103	-13.0158	0.997289	0.998702	0.197666	22	0.859982	0.860881	23	-0.347607	1557.35	0.640777	2.29674	-23	0.724362	0.66	0.600546	-23.4	1.65698	21	73561.7	26	2.22532	0.20749	0.0945401	miRNA	dsim	8530425	wxd1_rep1
Dsim_X:23099074-23099176	102	-12.8356	0.997263	0.999001	0.197427	22	0.861239	0.861638	23	-0.323093	1648.2	0.490196	2.31128	-21.5	0.665192	0.6875	0.73207	-23.4	1.65706	21	72704	26	2.22532	0.20749	0.0944968	miRNA	dsim	8530425	wxd1_rep1
Dsim_X:8673097-8673181	84	-17.4486	0.983833	0.960246	0.407801	23	0.895237	0.0556943	24	2.58482	2809.91	0.642857	3.32797	-27.2	-0.703538	0.769231	-0.393682	-31.1	0.999599	-33	-33	-33	1.64533	-33	0.0207641	miRNA	dsim	8530425	wxd1_rep1
NT_033778.4:12170154-12170245	91	-1.28701	1	0.9999	0.458645	23	0.0326967	0.162584	24.5	-33	0	0	0.598595	-23.3	-33	0.542857	-0.428443	-21	0.618071	-33	-33	-33	1.33803	1.64533	0.00121869	miRNA	dmel	192595761	ovary_v097
NT_033778.4:12170374-12170463	89	-0.924071	0.999997	0.9999	0.442117	22	0.0374963	0.219078	24.5	-33	0	0	1.17625	-25.6	-33	0.567164	0.0478023	-22.7	1.04236	-33	-33	-33	2.58432	-33	0.00148167	miRNA	dmel	192595761	ovary_v097
NT_033778.4:16831433-16831519	86	-2.11305	0.981547	0.9999	0.345313	23	0.983002	0.00239976	24.5	-33	0	0.651163	1.65631	-30.1	2.03331	0.633333	-0.346421	-17.5	-0.142624	-33	-33	-33	2.58779	-33	2.98164e-05	miRNA	dmel	192595761	ovary_v097
NT_037436.4:10365229-10365326	97	-0.520296	1	0.9998	0.496398	22	0.0768846	0.00829834	24.5	-33	0	0.618557	0.36774	-39.4	2.03331	0.666667	-0.333501	-27.7	1.54007	-33	-33	-33	1.64533	-33	0.000150117	miRNA	dmel	192595761	ovary_v097
NT_037436.4:11552540-11552694	154	-0.0588518	0.973665	0.958333	0.526258	21	0.25	0.416667	21	-33	0	0	1.87028	-69.4	-33	0.655738	-0.333333	-25.9	2.21512	-33	-33	-33	2.35047	-33	0.291667	miRNA	dmel	192595761	ovary_v097
NT_037436.4:21668715-21668803	88	-0.587503	0.999863	0.999246	0.482996	23	0.128631	0.436816	24.5	-0.333333	0	0	0.423384	-19.8	-33	0.6	-0.344098	-17.4	0.969807	-33	-33	-33	-33	-33	0.00905319	miRNA	dmel	192595761	ovary_v097
NT_033777.3:15417543-15417617	74	-0.244183	0.987413	0.994565	0.351537	23	0	0.994565	24.5	-33	0	0	1.28381	-22.4	-33	0.698413	-0.333333	-17.7	-0.138778	-33	-33	-33	-33	-33	0.0380435	miRNA	dmel	192595761	ovary_v097
NT_033777.3:16856276-16856343	67	2	0.590735	0.967742	0.316824	19	0.0322581	0.0645161	24.5	-33	0	0	1.70223	-24.5	-33	0	-33	0	-33	-33	-33	-33	-33	-33	0.0967742	miRNA	dmel	192595761	ovary_v097
NT_033777.3:16856276-16856343	67	2	0.590735	0.967742	0.316824	19	0.0322581	0.0645161	24.5	-33	0	0	1.70223	-24.5	-33	0	-33	0	-33	-33	-33	-33	-33	-33	0.0967742	miRNA	dmel	192595761	ovary_v097
NC_004354.4:569904-570004	100	2	0	0.666667	0.634921	21	0	0.333333	24.5	-33	0	0	-33	0	-33	0	-33	0	-33	-33	-33	-33	-33	-33	0.666667	miRNA	dmel	192595761	ovary_v097
NC_004354.4:633692-633752	60	-0.693883	0.980506	0.952381	0.39741	23	0.0793651	0.111111	25	-33	0	0.5	2.90856	-11.5	-33	0.541667	-0.503953	-12.5	1.30901	-33	-33	-33	-33	-33	0.174603	miRNA	dmel	192595761	ovary_v097
NC_004354.4:2010301-2010418	117	-0.535103	0.826005	0.75	0.543986	22	0.375	0.125	24.5	-33	0	0.735043	2.38392	-50.6	-33	0.490566	-33	-14.8	-33	-33	-33	-33	-33	-33	0.875	miRNA	dmel	192595761	ovary_v097
NC_004354.4:4368310-4368400	90	-0.562016	0.993055	0.995336	0.287215	22	0.613806	0.0270522	24.5	-33	0	0.666667	2.06009	-18	-33	0.631579	-33	-13.9	-33	-33	-33	-33	2.51261	-33	0.016791	miRNA	dmel	192595761	ovary_v097
NC_004354.4:4368484-4368582	98	-0.562016	0.993055	0.995336	0.287215	22	0.613806	0.0270522	24.5	-33	0	0.591837	2.06009	-19.7	-33	0.631579	-33	-13.9	-33	-33	-33	-33	2.51261	-33	0.016791	miRNA	dmel	192595761	ovary_v097
NC_004354.4:5622281-5622417	136	-1.62239	0.630722	0.8	0.663203	21	0.2	0.2	24.5	-33	0	0.338235	2.51261	-32.3	-33	0	-33	0	-33	-33	-33	-33	-33	-33	0.8	miRNA	dmel	192595761	ovary_v097
NC_004354.4:19551153-19551243	90	2	0.633193	0.666667	0.320741	18	0.333333	0	24.5	-33	0	0	-33	0	-33	0	-33	0	-33	-33	-33	-33	-33	-33	1	miRNA	dmel	192595761	ovary_v097
NC_004354.4:19559023-19559121	98	-0.0831102	0.93965	0.888889	0.331761	22	0.666667	0.111111	24.5	-33	0	0.632653	1.77923	-28.8	-33	0.518518	-33	-20.6	-33	-33	-33	-33	-33	-33	0.555556	miRNA	dmel	192595761	ovary_v097
NC_004354.4:19561237-19561328	91	-0.317173	0.84684	0.55	0.503985	21	0.5	0	24.5	-33	0	0.659341	2.81893	-36.8	-0.333333	0.466667	-0.333333	-15.8	0.748511	-33	-33	-33	-33	-33	0.35	miRNA	dmel	192595761	ovary_v097
NC_004354.4:19561838-19561932	94	-1.66998	0.657004	0.7	0.451324	23	0	0	24.5	-33	0	0.680851	2.0938	-39	-33	0	-33	0	-33	-33	-33	-33	-33	-33	0.5	miRNA	dmel	192595761	ovary_v097
NC_004354.4:23205160-23205228	68	-3.32887	0.999977	0.9998	0.279604	22	0.966307	0.80124	24.5	-33	0	0.735294	2.38407	-21.5	1.09994	0.769231	2.39461	-21.5	2.18795	-33	-33	-33	-0.199494	2.7176	0.00149341	miRNA	dmel	192595761	ovary_v097
NC_004354.4:23291451-23291519	68	-3.32887	0.999977	0.9998	0.279604	22	0.966307	0.80124	24.5	-33	0	0.735294	2.38407	-21.5	1.09994	0.769231	2.39461	-21.5	2.18795	-33	-33	-33	-0.199494	2.7176	0.00149341	miRNA	dmel	192595761	ovary_v097
NC_004354.4:23538216-23538284	68	-3.32887	0.999977	0.9998	0.279621	22	0.216057	0.583183	24.5	-0.333333	0	0	2.39672	NA	-33	0.476191	-33	0	-33	-33	-33	-33	0.0829091	2.95919	0.00149341	miRNA	dmel	192595761	ovary_v097
NC_004353.4:626142-626202	60	-4.96766	0.84766	0.981603	0.525647	21	0.944809	0.00788436	23	0.758316	23653.1	0.7	2.55728	-24.8	1.14878	0.7	-0.00716763	-24.8	2.02096	-33	-33	-33	0.147698	-33	0.086728	miRNA	dmel	204807195	ok_ovary_cs
NC_004354.4:12636352-12636421	69	-10.4431	0.91455	1	0.470671	21	0.84348	0.854645	-33	-33	0	0.695652	1.70976	-21.5	2.26133	0.676471	-0.337323	-20.4	1.55916	-33	-33	-33	1.8996	-33	0.0326522	miRNA	dmel	204807195	ok_ovary_cs
NC_004354.4:15507956-15508046	90	-8.61001	0.992865	1	0.382615	23	0.0073006	0.0598649	-33	-33	0	0.533333	1.52189	-23.2	1.93773	0.533333	-0.360932	-23.2	-0.225474	-33	-33	-33	0.965773	-33	0.0379631	miRNA	dmel	204807195	ok_ovary_cs
NC_004354.4:15508970-15509039	69	-17.3856	0.999687	1	0.369627	22	0.2747	0.7264	-33	-33	0	0.695652	0.028691	-22.1	2.37389	0.676471	-0.333986	-21.3	1.51673	-33	-33	-33	0.921608	-33	0.0185897	miRNA	dmel	204807195	ok_ovary_cs
NC_004354.4:15509459-15509560	101	-16.6846	1	1	0.391794	23	0.9808	0.0025	-33	-33	0	0.673267	1.79953	-39.5	2.35702	0.643678	-0.370065	-26.6	-0.182288	-33	-33	-33	2.61383	-33	0.0151681	miRNA	dmel	204807195	ok_ovary_cs
NC_004354.4:15509460-15509560	100	-16.6846	1	1	0.391794	23	0.9808	0.0025	-33	-33	0	0.68	1.79953	-39.5	2.35702	0.643678	-0.370065	-26.6	-0.182288	-33	-33	-33	2.61383	-33	0.0151681	miRNA	dmel	204807195	ok_ovary_cs
NC_004354.4:23205153-23205223	70	-26.7636	0.980429	0.9997	0.27907	22	0.954814	0.80056	-33	-33	0	0.714286	3.39405	-21	1.45224	0.694444	1.90903	-21.5	2.15272	-33	-33	-33	0.0540493	2.29861	0.0149624	miRNA	dmel	204807195	ok_ovary_cs
NC_004354.4:23205157-23205225	68	-26.7636	0.980429	0.9997	0.27907	22	0.954814	0.80056	-33	-33	0	0.735294	3.39405	-21.5	1.45224	0.694444	1.90903	-21.5	2.15272	-33	-33	-33	0.0540493	2.29861	0.0149624	miRNA	dmel	204807195	ok_ovary_cs
NC_004354.4:23291446-23291515	69	-26.7691	0.979772	0.999201	0.279154	22	0.952438	0.796363	-33	-33	0	0.724638	3.39405	-21.5	1.45355	0.704225	1.79408	-22.4	2.17854	-33	-33	-33	0.0540493	2.29861	0.0150287	miRNA	dmel	204807195	ok_ovary_cs
NC_004354.4:23538221-23538286	65	-26.7809	0.979877	0.9996	0.279015	22	0.25	0.554078	24	-33	0	0.492308	3.39405	NA	-33	0.492754	2.35414	0	2.153	-33	-33	-33	-0.393012	2.47872	0.0149845	miRNA	dmel	204807195	ok_ovary_cs
NC_004354.4:9091218-9091300	82	-28.5335	0.998365	0.990884	0.395651	23	0.950555	0.0105034	21.5	1.36517	68.0776	0.609756	2.99299	-26.4	2.14918	0.769231	2.31704	-26.4	2.20189	-33	-33	-33	2.1516	-33	0.00567171	miRNA	dmel	204807195	ok_ovary_cs
NC_004354.4:9091238-9091301	63	-28.5542	0.998443	0.990884	0.395676	23	0.950456	0.0106025	21.5	1.89207	76.6006	0.698413	2.99299	-24.3	2.32145	0.769231	2.31704	-26.4	2.20189	-33	-33	-33	2.1516	-33	0.00566419	miRNA	dmel	204807195	ok_ovary_cs
NT_033777.3:10091140-10091206	66	-12.8702	0.884835	1	0.507909	21	0.981383	0.0505585	-33	-33	0	0.69697	2.15158	-24.6	2.57199	0.69697	1.11756	-24.6	1.8149	-33	-33	-33	0.984658	-33	0.031746	miRNA	dmel	204807195	ok_ovary_cs
NT_033777.3:10100949-10101026	77	-31.02	0.936252	1	0.534692	21	0.984	0.0008	-33	-33	0	0.675325	1.90086	-29.5	2.08415	0.693333	-0.34561	-29.5	2.03679	-33	-33	-33	2.27453	2.35047	0.00582803	miRNA	dmel	204807195	ok_ovary_cs
NT_033777.3:10100950-10101026	76	-31.02	0.936252	1	0.534692	21	0.984	0.0008	-33	-33	0	0.684211	1.90086	-29.5	2.08415	0.693333	-0.34561	-29.5	2.03679	-33	-33	-33	2.27453	2.35047	0.00582803	miRNA	dmel	204807195	ok_ovary_cs
NT_033777.3:10408148-10408218	70	-43.4935	0.997869	1	0.401703	22	0.3438	0.3448	-33	-33	0	0.6	1.96404	-20.5	1.0756	0.6	-0.15314	-20.5	1.9687	-33	-33	-33	0.677751	-33	0.00569731	miRNA	dmel	204807195	ok_ovary_cs
NT_033777.3:10408289-10408367	78	-45.505	0.999928	1	0.411289	22	0.9777	0.0011	-33	-33	0	0.589744	2.07103	-22.4	2.66667	0.62069	-0.333333	-16.1	1.57088	-33	-33	-33	0.629932	-33	0.00337039	miRNA	dmel	204807195	ok_ovary_cs
NT_033777.3:10408309-10408367	58	-45.505	0.999928	1	0.411289	22	0.9777	0.0011	-33	-33	0	0.62069	2.07103	-16.1	2.66667	0.62069	-0.333333	-16.1	1.57088	-33	-33	-33	0.629932	-33	0.00337039	miRNA	dmel	204807195	ok_ovary_cs
NT_033777.3:20735938-20736000	62	-21.4034	0.977331	1	0.486844	21	0.9086	0.9927	-33	-33	0	0.741935	1.71073	-29.1	1.79123	0.721311	-0.408088	-29	1.54655	-33	-33	-33	1.8996	-33	0.01116	miRNA	dmel	204807195	ok_ovary_cs
NT_033777.3:20735938-20736002	64	-21.4034	0.977331	1	0.486844	21	0.9086	0.9927	-33	-33	0	0.71875	1.71073	-29.1	1.79123	0.721311	-0.408088	-29	1.54655	-33	-33	-33	1.8996	-33	0.01116	miRNA	dmel	204807195	ok_ovary_cs
NT_033777.3:22292879-22292953	74	-14.2043	0.976303	1	0.399669	25	0.9003	0.0005	-33	-33	0	0.702703	0.13486	-24.5	1.43357	0.702703	-0.462069	-24.5	-0.180403	-33	-33	-33	1.74392	-33	0.0159157	miRNA	dmel	204807195	ok_ovary_cs
NT_033777.3:24658606-24658662	56	-6.37352	0.998467	1	0.521738	22	0.0698439	0.00575185	-33	-33	0	0.714286	1.84175	-16.1	0.438397	0.714286	-0.363673	-16.1	1.62165	-33	-33	-33	-33	-33	0.0583402	miRNA	dmel	204807195	ok_ovary_cs
NT_033777.3:25646522-25646584	62	-23.8241	0.997499	1	0.54867	22	0.002	0.957	-33	-33	0	0.645161	1.82056	-20.2	1.77705	0.645161	-0.334404	-20.2	1.61921	-33	-33	-33	3.19256	-33	0.0149699	miRNA	dmel	204807195	ok_ovary_cs
NT_033777.3:25646523-25646584	61	-23.8241	0.997499	1	0.54867	22	0.002	0.957	-33	-33	0	0.622951	1.82056	-19.1	1.77705	0.645161	-0.334404	-20.2	1.61921	-33	-33	-33	3.19256	-33	0.0149699	miRNA	dmel	204807195	ok_ovary_cs
NT_033777.3:25651417-25651484	67	-16.0668	0.989617	1	0.579396	22	0.00103365	0.966808	-33	-33	0	0.537313	1.86905	-20.1	1.73954	0.537313	-0.349444	-20.1	2.09222	-33	-33	-33	-33	-33	0.0303204	miRNA	dmel	204807195	ok_ovary_cs
NT_033777.3:29215606-29215676	70	-13.8817	0.845515	1	0.442746	22	0.687272	0.00182482	-33	-33	0	0.657143	1.813	-21.1	1.62278	0.647887	0.185951	-21.1	2.59613	-33	-33	-33	0.270843	-33	0.0416287	miRNA	dmel	204807195	ok_ovary_cs
NT_033777.3:29215607-29215695	88	-13.8817	0.845515	1	0.442746	22	0.687272	0.00182482	-33	-33	0	0.5	1.813	-19.9	1.62278	0.647887	0.185951	-21.1	2.59613	-33	-33	-33	0.270843	-33	0.0416287	miRNA	dmel	204807195	ok_ovary_cs
NT_033777.3:29217201-29217268	67	-23.8053	0.957723	1	0.458182	22	0.6372	0.0081	-33	-33	0	0.80597	1.44453	-25.2	1.99308	0.794118	-0.290617	-25.2	2.28868	-33	-33	-33	2.22955	-33	0.0205948	miRNA	dmel	204807195	ok_ovary_cs
NT_033777.3:29217202-29217269	67	-23.8053	0.957723	1	0.458182	22	0.6372	0.0081	-33	-33	0	0.776119	1.44453	-22.1	1.99308	0.794118	-0.290617	-25.2	2.28868	-33	-33	-33	2.22955	-33	0.0205948	miRNA	dmel	204807195	ok_ovary_cs
NT_033777.3:4295385-4295443	58	-7.71748	0.989429	1	0.390456	21	0.00127388	0.00212314	-33	-33	0	0.655172	1.74192	-28.9	1.29352	0.655172	-0.613634	-28.9	1.80111	-33	-33	-33	1.64533	-33	0.0386412	miRNA	dmel	204807195	ok_ovary_cs
NT_033777.3:9989121-9989189	68	-7.00403	0.99997	1	0.365011	22	0.00208333	0	-33	-33	0	0.470588	1.57693	-14.1	-33	0.470588	-33	-14.1	-33	-33	-33	-33	-33	-33	0.0833333	miRNA	dmel	204807195	ok_ovary_cs
NT_033778.4:15657084-15657146	62	-2.55081	0.99849	1	0.552586	22	0.886097	0	-33	-33	0	0.709677	1.54928	-26.2	2.54335	0.709677	-0.337397	-26.2	1.67652	-33	-33	-33	-33	-33	0.0636516	miRNA	dmel	204807195	ok_ovary_cs
NT_033778.4:15945888-15945949	61	-3.70786	0.989405	1	0.499747	21	0.312883	0.368098	-33	-33	0	0.459016	1.58322	-14.4	-33	0.459016	-33	-14.4	-33	-33	-33	-33	-33	-33	0.116564	miRNA	dmel	204807195	ok_ovary_cs
NT_033778.4:16831448-16831509	61	-42.1699	0.999949	0.9999	0.344831	23	0.972703	0.0029997	-33	-33	0	0.622951	1.78911	-17.5	2.08882	0.622951	-0.327111	-17.5	-0.132517	-33	-33	-33	2.50619	-33	0.00198272	miRNA	dmel	204807195	ok_ovary_cs
NT_033778.4:18180151-18180209	58	-2.06427	0.971528	0.526316	0.437157	21	0.0175439	0.385965	22	2.64118	2035088	0.793103	1.73759	-31.9	-0.503953	0.793103	-0.381757	-31.9	2.18422	-33	-33	-33	-33	-33	0.368421	miRNA	dmel	204807195	ok_ovary_cs
NT_033778.4:20606080-20606143	63	-16.9157	0.994286	1	0.345012	22	0.9814	0.9936	-33	-33	0	0.666667	1.91884	-16.9	0.688063	0.65625	-0.316586	-16.9	1.08247	-33	-33	-33	2.31721	-33	0.0122704	miRNA	dmel	204807195	ok_ovary_cs
NT_033778.4:20606081-20606144	63	-16.9212	0.994303	1	0.345021	22	0.9816	0.9935	-33	-33	0	0.666667	1.97088	-16.9	0.847801	0.666667	-0.327081	-16.9	1.08167	-33	-33	-33	-33	-33	0.0122555	miRNA	dmel	204807195	ok_ovary_cs
NT_033778.4:2552196-2552253	57	-2.2096	0.983831	0.994652	0.238535	22	0.128342	0.229946	-33	-33	0	0	1.7667	-15	-33	0.666667	-0.332485	-15	1.74377	-33	-33	-33	-33	-33	0.117647	miRNA	dmel	204807195	ok_ovary_cs
NT_033778.4:8445000-8445068	68	-16.0362	0.999698	0.9999	0.42209	22	0.982602	0.00249975	-33	-33	0	0.588235	2.01858	-22.9	1.83369	0.57971	-0.302743	-22.9	1.57534	-33	-33	-33	1.59383	-33	0.0211457	miRNA	dmel	204807195	ok_ovary_cs
NT_033778.4:9553761-9553829	68	-23.8894	0.999827	1	0.539324	22	0.4539	0.5311	-33	-33	0	0.705882	0.271186	-28.1	2.02644	0.727273	-0.336114	-28	1.56473	-33	-33	-33	1.39101	-33	0.0245827	miRNA	dmel	204807195	ok_ovary_cs
NT_033779.5:16697935-16698004	69	-35.4711	0.998014	0.9995	0.369475	22	0.984608	0.00109945	-33	-0.402015	0	0.637681	3.04123	-18.8	0.949321	0.637681	-0.333333	-18.8	2.54702	-33	-33	-33	2.18624	-33	0.00479133	miRNA	dmel	204807195	ok_ovary_cs
NT_033779.5:16697935-16698006	71	-35.4711	0.998014	0.9995	0.369475	22	0.984608	0.00109945	-33	-0.402015	0	0.619718	3.04123	-18.8	0.949321	0.637681	-0.333333	-18.8	2.54702	-33	-33	-33	2.18624	-33	0.00479133	miRNA	dmel	204807195	ok_ovary_cs
NT_033779.5:16698399-16698477	78	-10.2223	0.991338	1	0.421801	22	0.971621	0.00273281	-33	-33	0	0.641026	1.71701	-33.4	0	0.641026	-0.462851	-33.4	2.18865	-33	-33	-33	1.64533	-33	0.037839	miRNA	dmel	204807195	ok_ovary_cs
NT_033779.5:16698573-16698636	63	-26.1669	0.999997	0.997904	0.317109	22	0.587666	0.595749	-33	-0.361388	0	0.666667	2.50435	-17.5	2.17232	0.666667	-0.351862	-17.5	1.35536	-33	-33	-33	1.62585	-33	0.00982476	miRNA	dmel	204807195	ok_ovary_cs
NT_033779.5:16698758-16698822	64	-32.9645	0.999975	1	0.34005	23	0.9786	0.9904	-33	-33	0	0.625	1.59525	-22.1	2.05698	0.625	-0.352335	-22.1	0.00461644	-33	-33	-33	-0.061322	2.90856	0.00555618	miRNA	dmel	204807195	ok_ovary_cs
NT_033779.5:16724795-16724859	64	-1.54138	0.921933	1	0.301129	26	0.756098	0.231707	-33	-33	0	0	-0.0513383	-10	2.51121	0.59375	-0.456584	-10	-0.200683	-33	-33	-33	2.66032	-33	0.0780488	miRNA	dmel	204807195	ok_ovary_cs
NT_033779.5:18471445-18471509	64	-4.30855	0.98418	1	0.458415	21	0	0.792543	-33	-33	0	0.5625	1.54397	-18	1.89346	0.5625	-0.466711	-18	1.86779	-33	-33	-33	-33	-33	0.0669216	miRNA	dmel	204807195	ok_ovary_cs
NT_033779.5:18472042-18472104	62	-26.5017	0.973932	1	0.377905	21	0.9867	0.9957	-33	-33	0	0.612903	1.83762	-22.6	2.6131	0.612903	-0.33397	-22.6	1.95011	-33	-33	-33	-33	-33	0.00580781	miRNA	dmel	204807195	ok_ovary_cs
NT_033779.5:18472343-18472404	61	-11.5348	0.9999	1	0.489957	22	0.896392	0.00370028	-33	-33	0	0.52459	1.15866	-16.5	0.688487	0.52459	-0.484021	-16.5	1.55892	-33	-33	-33	1.73124	-33	0.0425532	miRNA	dmel	204807195	ok_ovary_cs
NT_033779.5:19569492-19569558	66	-33.4148	0.999317	1	0.485583	24	0.3126	0.8598	-33	-33	0	0	2.44085	-25.7	-0.447043	0.6875	2.27409	-25.4	0.315708	-33	-33	-33	-0.292565	2.35853	0.00386916	miRNA	dmel	204807195	ok_ovary_cs
NT_033779.5:19569899-19569967	68	-33.0639	0.999349	1	0.48675	24	0.3085	0.8589	-33	-33	0	0	2.44886	-29.7	-0.337361	0.735294	-0.372741	-29.7	0.333484	-33	-33	-33	1.73204	-33	0.00302859	miRNA	dmel	204807195	ok_ovary_cs
NT_033779.5:19570187-19570257	70	-28.5401	0.997028	1	0.489036	24	0.2813	0.8983	-33	-33	0	0	2.40398	-19.8	-0.367605	0.6	-0.449466	-19.8	0.213571	-33	-33	-33	0.847173	2.73274	0.0026015	miRNA	dmel	204807195	ok_ovary_cs
NT_033779.5:5640958-5641023	65	-6.22912	0.960627	1	0.394644	21	0.888138	0	-33	-33	0	0.615385	1.73756	-18.5	-33	0.615385	-33	-18.5	-33	-33	-33	-33	1.55335	-33	0.0608108	miRNA	dmel	204807195	ok_ovary_cs
NT_033779.5:5641079-5641144	65	-6.08519	0.996195	1	0.409562	22	0.984797	0.00675676	-33	-33	0	0.646154	1.51571	-22.2	1.76908	0.646154	-0.568744	-22.2	1.86597	-33	-33	-33	0.00812799	-33	0.0945946	miRNA	dmel	204807195	ok_ovary_cs
NT_033779.5:5641208-5641268	60	-4.46614	0.998801	1	0.365879	22	0.980978	0.00271739	-33	-33	0	0.7	1.40943	-18	1.66537	0.7	-0.386918	-18	1.54262	-33	-33	-33	2.58923	-33	0.0733696	miRNA	dmel	204807195	ok_ovary_cs
NT_033779.5:5641315-5641375	60	-8.38373	0.969007	1	0.349687	25	0.00681818	0.989489	-33	-33	0	0.633333	2.35776	-18.5	2.66667	0.633333	-0.333333	-18.5	-0.239016	-33	-33	-33	-33	-33	0.0375	miRNA	dmel	204807195	ok_ovary_cs
NT_033779.5:5642127-5642188	61	-4.89718	0.965853	1	0.376418	21	0.979675	0.00271003	-33	-33	0	0.655738	2.10825	-21.4	1.70716	0.655738	-0.398791	-21.4	2.43941	-33	-33	-33	2.5555	-33	0.046748	miRNA	dmel	204807195	ok_ovary_cs
NT_033779.5:6902078-6902138	60	-0.98999	0.796693	1	0.501598	23	0.968254	0.031746	-33	-33	0	0.766667	2.52409	-31.5	0.942809	0.766667	-0.365105	-31.5	0.423939	-33	-33	-33	2.35047	-33	0.142857	miRNA	dmel	204807195	ok_ovary_cs
NT_033779.5:7425815-7425878	63	-32.2151	0.989859	1	0.590645	23	0.9772	0.0026	-33	-33	0	0.603175	1.75628	-24.8	2.41419	0.603175	-0.277278	-24.8	1.51276	-33	-33	-33	0.979496	-33	0.00521839	miRNA	dmel	204807195	ok_ovary_cs
NT_033779.5:7425979-7426042	63	-11.4622	0.989971	0.998602	0.448406	24	0.00259636	0.00259636	22	1.6322	141972	0.634921	1.76758	-23.1	0.664823	0.625	0.447775	-23.1	0.122223	-33	-33	-33	1.35572	-33	0.0259291	miRNA	dmel	204807195	ok_ovary_cs
NT_033779.5:857557-857619	62	-0.753149	0.974504	1	0.339645	22	0.905405	0.0765766	-33	-33	0	0.645161	1.84152	-22.8	2.52078	0.645161	-0.309858	-22.8	2.05231	-33	-33	-33	-33	-33	0.0810811	miRNA	dmel	204807195	ok_ovary_cs
NT_037436.4:10319804-10319869	65	-42.3568	1	0.999301	0.496665	22	0.07145	0.0089937	-33	-33	0	0.676923	0.561185	-28.4	2.62994	0.625	-0.333032	-28.1	1.5404	-33	-33	-33	2.00471	-33	0.0057028	miRNA	dmel	204807195	ok_ovary_cs
NT_037436.4:10319808-10319869	61	-42.3568	1	0.999301	0.496665	22	0.07145	0.0089937	-33	-33	0	0.655738	0.561185	-27.6	2.62994	0.625	-0.333032	-28.1	1.5404	-33	-33	-33	2.00471	-33	0.0057028	miRNA	dmel	204807195	ok_ovary_cs
NT_037436.4:10319809-10319869	60	-42.3568	1	0.999301	0.496665	22	0.07145	0.0089937	-33	-33	0	0.633333	0.561185	-27.1	2.62994	0.625	-0.333032	-28.1	1.5404	-33	-33	-33	2.00471	-33	0.0057028	miRNA	dmel	204807195	ok_ovary_cs
NT_037436.4:10365241-10365304	63	-44.5741	1	0.999101	0.496435	22	0.0773304	0.0098911	-33	-33	0	0.634921	0.403535	-28.2	2.63439	0.666667	-0.332946	-27.7	1.54032	-33	-33	-33	2.3182	-33	0.00623378	miRNA	dmel	204807195	ok_ovary_cs
NT_037436.4:10365243-10365304	61	-44.5741	1	0.999101	0.496435	22	0.0773304	0.0098911	-33	-33	0	0.655738	0.403535	-28.2	2.63439	0.666667	-0.332946	-27.7	1.54032	-33	-33	-33	2.3182	-33	0.00623378	miRNA	dmel	204807195	ok_ovary_cs
NT_037436.4:10365245-10365304	59	-44.5741	1	0.999101	0.496435	22	0.0773304	0.0098911	-33	-33	0	0.644068	0.403535	-27.2	2.63439	0.666667	-0.332946	-27.7	1.54032	-33	-33	-33	2.3182	-33	0.00623378	miRNA	dmel	204807195	ok_ovary_cs
NT_037436.4:11773015-11773104	89	-6.1195	0.898371	1	0.41599	21	0.990283	0	-33	-33	0	0.719101	2.24812	-26.2	1.27783	0.719101	2.30741	-26.2	2.05918	-33	-33	-33	-33	-33	0.0404858	miRNA	dmel	204807195	ok_ovary_cs
NT_037436.4:19565139-19565202	63	-6.93071	0.920558	0.964623	0.351193	22	0.91326	0.732704	-33	-0.333333	0	0.634921	2.26624	-22.3	2.11848	0.634921	-0.41927	-22.3	1.85156	-33	-33	-33	2.77716	-33	0.0311845	miRNA	dmel	204807195	ok_ovary_cs
NT_037436.4:19797966-19798048	82	-18.6145	0.928624	1	0.469633	21	0.0006	0.9933	-33	-33	0	0.585366	2.04097	-21.5	2.66667	0.622951	-0.562149	-19.9	1.68861	-33	-33	-33	2.0938	-33	0.0152078	miRNA	dmel	204807195	ok_ovary_cs
NT_037436.4:21574033-21574108	75	-1.62316	0.987661	1	0.379012	22	1	0.0769231	-33	-33	0	0.506667	1.64533	-16.6	1.76383	0.506667	-0.500744	-16.6	1.90478	-33	-33	-33	2.35047	-33	0.269231	miRNA	dmel	204807195	ok_ovary_cs
NT_037436.4:3251035-3251105	70	-21.4857	0.999997	0.9999	0.439629	22	0.660034	0.324667	-33	-33	0	0.685714	0.108263	-34.3	2.30724	0.597015	-0.340203	-28	1.55181	22	3215.15	11	2.35203	-33	0.0293829	miRNA	dmel	204807195	ok_ovary_cs
NT_037436.4:3251036-3251106	70	-21.4857	0.999997	0.9999	0.439629	22	0.660034	0.324667	-33	-33	0	0.657143	0.108263	-32.8	2.30724	0.597015	-0.340203	-28	1.55181	22	3215.15	11	2.35203	-33	0.0293829	miRNA	dmel	204807195	ok_ovary_cs
NT_037436.4:3251038-3251105	67	-21.4857	0.999997	0.9999	0.439629	22	0.660034	0.324667	-33	-33	0	0.626866	0.108263	-29.4	2.30724	0.597015	-0.340203	-28	1.55181	22	3215.15	11	2.35203	-33	0.0293829	miRNA	dmel	204807195	ok_ovary_cs
NT_037436.4:642223-642283	60	-49.5597	0.999999	1	0.309496	23	0.9747	0.0012	-33	-33	0	0.7	2.38524	-21.3	2.46781	0.7	-0.336648	-21.3	-0.0416611	-33	-33	-33	2.68903	-33	0.00236809	miRNA	dmel	204807195	ok_ovary_cs
NT_037436.4:642223-642284	61	-49.5597	0.999999	1	0.309496	23	0.9747	0.0012	-33	-33	0	0.688525	2.38524	-21.3	2.46781	0.7	-0.336648	-21.3	-0.0416611	-33	-33	-33	2.68903	-33	0.00236809	miRNA	dmel	204807195	ok_ovary_cs
NT_037436.4:8571822-8571887	65	-1.95716	0.941651	1	0.29482	24	0.00321543	0.0192926	-33	-33	0	0.615385	-0.00512463	-19.3	2.2991	0.615385	-0.463716	-19.3	0.422832	-33	-33	-33	-33	-33	0.109325	miRNA	dmel	204807195	ok_ovary_cs
Scaffold109:1647741-1647803	62	-16.5494	0.999999	1	0.432966	22	0.559205	0.1334	-33	-33	0	0	1.68929	NA	-0.347983	0.548387	-0.343793	0	2.01126	-33	-33	-33	0.250641	-33	0.00600739	miRNA	whitefly	1390651722	all.bam
Scaffold1193:1209879-1209941	62	-30.1426	1	0.999998	0.356573	22	0.211159	0.0019579	23	2.6131	7.86621	0	1.99202	-21	-33	0.730159	-0.329459	-21	1.93848	-33	-33	-33	-0.295385	-33	0.00139783	miRNA	whitefly	1390651722	all.bam
Scaffold123:2422101-2422163	62	-12.9952	1	0.999759	0.562117	24	0.95246	0.0222441	-33	-33	0	0.612903	2.7026	-26	1.19334	0.59375	-0.557846	-26	-0.277177	-33	-33	-33	-33	-33	0.0126077	miRNA	whitefly	1390651722	all.bam
Scaffold123:8908668-8908739	71	-29.3834	0.999953	0.999989	0.373907	22	0.960149	0.0122633	20	-0.340727	2701.24	0.647887	2.47112	-29.3	1.35416	0.666667	-0.121002	-29.3	2.22752	19.5	17.4725	30	2.90856	2.89735	0.00151428	miRNA	whitefly	1390651722	all.bam
Scaffold123:8908669-8908734	65	-29.3834	0.999953	0.999989	0.373907	22	0.960149	0.0122633	20	-0.340727	2701.24	0.676923	2.47112	-28.2	1.35416	0.666667	-0.121002	-29.3	2.22752	19.5	17.4725	30	2.90856	2.89735	0.00151428	miRNA	whitefly	1390651722	all.bam
chr2L:20148706-20150115	1409	-19.3892	0.991982	0.982944	0.354708	25	0.838196	0.282316	27	-0.496373	3590.66	0.577715	1.24019	-296.9	0.201008	0	-33	0	-33	24.5	156418	10	2.7704	1.64533	0.277379	piRNA	dmel	9708709	dcr2-het_rep1
chr2L:20150256-20153000	2744	-25.6424	0.999697	0.96131	0.483825	25	0.736905	0.179018	25	0.317589	5505.95	0.690962	1.35136	-985	0.104116	0	-33	0	-33	25.5	526934	10	0.893563	1.64533	0.37128	piRNA	dmel	9708709	dcr2-het_rep1
chr2L:20153146-20153759	613	-5.5708	0.991306	0.995305	0.333762	25	0.892019	0.408451	20	-33	0	0.564437	1.23021	-110.9	-33	0	-33	0	-33	-33	-33	-33	-0.369274	1.21507	0.549296	piRNA	dmel	9708709	dcr2-het_rep1
chr2L:20155812-20156078	266	-1.7912	0.926747	0.761905	0.303363	25	0.571429	0.52381	24.5	-33	0	0.526316	2.35047	-35.9	-33	0.585366	-0.333333	-11.3	0.299225	24.6667	95238.1	10	1.61878	-33	1	piRNA	dmel	9708709	dcr2-het_rep1
chr2L:20157416-20157682	266	-1.28325	0.883521	0.571429	0.283249	25	0.52381	0.666667	24.5	-33	0	0.526316	1.63902	-35.9	-33	0.466019	-33	0	-33	23.6667	142857	10	2.90856	-33	1	piRNA	dmel	9708709	dcr2-het_rep1
chr2L:20159020-20159365	345	-1.43627	0.93268	0.68	0.281021	24	0.48	0.6	24.5	-0.333333	0	0.585507	3.00327	-52	-33	0	-33	0	-33	25.75	160000	19	3.00327	-33	0.92	piRNA	dmel	9708709	dcr2-het_rep1
chr2L:20159470-20164467	4997	-12.7644	0.992392	0.832586	0.35219	25	0.541106	0.529148	25	-0.416667	1494.77	0.588753	1.31873	-1165.9	-0.404651	0	-33	0	-33	25	65769.8	10	3.00327	2.0803	0.77429	piRNA	dmel	9708709	dcr2-het_rep1
chr2L:20164733-20164812	79	-2.83387	0.988194	0.666667	0.487016	25	0.5	0.444444	23	0.764719	18518.5	0.481013	1.00629	-12.6	-33	0.461539	-33	-14.8	-33	25.5	407407	10	0.290876	2.29556	0.833333	piRNA	dmel	9708709	dcr2-het_rep1
chr2L:20164956-20164980	24	-0.344934	0.989339	0.8	0.394888	24	0.05	0.375	24.5	-33	0	0	2.18078	NA	-33	0.45614	-33	0	-33	25.5	1475000	10	-33	-33	0.375	piRNA	dmel	9708709	dcr2-het_rep1
chr2L:20165800-20166267	467	-4.03283	0.992175	0.925187	0.368781	25	0.862843	0.229426	24	1.38885	22443.9	0.595289	2.02233	-96.2	-0.333333	0	-33	0	-33	25.25	289277	10	1.88814	1.64533	0.42394	piRNA	dmel	9708709	dcr2-het_rep1
chr2L:20167112-20168624	1512	-13.3888	0.984911	0.973397	0.328414	24	0.844475	0.375853	28	-0.499525	2046.38	0.571429	0.952577	-308.2	-0.611775	0	-33	0	-33	24.5	111869	10	1.64533	1.42159	0.39427	piRNA	dmel	9708709	dcr2-het_rep1
chr2L:20168733-20169441	708	-10.6824	0.991909	0.973812	0.364702	25	0.867119	0.28128	25.5	-0.7698	0	0.621469	1.61305	-157.3	0.611775	0	-33	0	-33	24.5	188167	10	3.39405	1.60305	0.351115	piRNA	dmel	9708709	dcr2-het_rep1
chr2L:20169664-20170008	344	-4.16131	0.846226	0.712644	0.350727	25	0.563218	0.632184	26.4	2.66667	11494.2	0.44186	2.09009	-53.81	-0.503953	0	-33	0	-33	26	344828	10	2.35047	2.90856	0.735632	piRNA	dmel	9708709	dcr2-het_rep1
chr2L:20171732-20171850	118	-2.14553	0.994127	0.634146	0.382333	25	0.414634	0.292683	24	1.33333	24390.2	0.474576	1.43858	-19.1	-33	0.489796	-0.503953	-18.6	-0.517782	26	146342	14	1.64533	-33	0.853658	piRNA	dmel	9708709	dcr2-het_rep1
chr2L:20172173-20172492	319	-2.36167	0.991996	0.5	0.409477	23	0.430556	0.458333	24	2.66667	69444.4	0.639498	1.33221	-100.1	-33	0	-33	0	-33	27	138889	10	2.22532	1.64533	0.791667	piRNA	dmel	9708709	dcr2-het_rep1
chr2L:20173032-20173287	255	-2.60577	0.962311	0.918519	0.370459	24	0.807407	0.266667	25	-0.503953	0	0.603922	2.49131	-59.9	0.228665	0.576923	-0.597505	-22.6	-0.144385	26	459259	10	1.64533	3.39405	0.562963	piRNA	dmel	9708709	dcr2-het_rep1
chr2L:20173396-20173577	181	-2.31762	0.997109	0.875912	0.430521	24	0.80292	0.0948905	25	0.266667	7299.27	0.486188	2.03279	-42.9	-33	0.479167	-33	-19.2	-33	25.5	810219	10	2.90856	2.90856	0.416058	piRNA	dmel	9708709	dcr2-het_rep1
chr2L:20175875-20176365	490	-3.97257	0.993975	0.994872	0.481866	25	0.661539	0.251282	24.5	-33	0	0.661224	0.593825	-150.9	0.159364	0	-33	0	-33	25.75	61538.5	NA	0.105001	2.22295	0.569231	piRNA	dmel	9708709	dcr2-het_rep1
chr2L:20176562-20178724	2162	-4.72917	0.949237	0.945206	0.433465	25	0.773973	0.383562	24.5	-0.666667	0	0.629972	2.66032	-684.1	-0.333333	0	-33	0	-33	25	54794.5	10	2.02043	2.47436	0.787671	piRNA	dmel	9708709	dcr2-het_rep1
chr2L:20183703-20185640	1937	-5.42723	0.979658	0.981818	0.477541	24	0.727273	0.2	24.5	-33	0	0.659783	0.207611	-625.7	-33	0	-33	0	-33	-33	-33	-33	0.791266	3.39405	1	piRNA	dmel	9708709	dcr2-het_rep1
chr2L:20198289-20198760	471	-0.882542	0.997661	0.835443	0.327499	24	0.21519	0.56962	24.5	-0.333333	0	0.569002	2.03999	-95.3	-33	0	-33	0	-33	25.5	683544	10	3.00327	-33	0.506329	piRNA	dmel	9708709	dcr2-het_rep1
chr2L:20198900-20199167	267	-1.77123	0.857803	0.617647	0.337626	26	0.441177	0.470588	22	-33	0	0.569288	2.62043	-48.8	-33	0.584906	-33	-23.1	-33	26	176471	9	2.73274	2.22532	0.764706	piRNA	dmel	9708709	dcr2-het_rep1
chr2L:20200790-20201097	307	-4.74452	0.996147	0.884393	0.37839	24	0.0982659	0.190751	26	1.38095	28901.7	0.534202	1.51438	-55.6	-33	0	-33	0	-33	25	213873	10	2.9647	-33	0.456647	piRNA	dmel	9708709	dcr2-het_rep1
chr2L:20201200-20201413	213	-1.24497	0.974533	0.780488	0.465092	25	0.341463	0.365854	23.2	-0.333333	0	0.516432	2.36403	-41	-33	0.514852	-33	-21.9	-33	27	195122	10	2.90856	-33	0.829268	piRNA	dmel	9708709	dcr2-het_rep1
chr2L:20204587-20204763	176	-0.810289	0.983855	0.586956	0.330628	24	0.478261	0.369565	26	-0.471405	0	0.352273	1.03096	-12.4	-33	0.463415	-33	0	-33	25.6667	543478	10	1.71605	-33	0.673913	piRNA	dmel	9708709	dcr2-het_rep1
chr2L:20205388-20205497	109	-1.80315	0.999473	0.929487	0.355676	24	0.871795	0.153846	24	2.40665	32051.3	0.513761	1.84744	-21.4	-33	0.716418	-33	-19.1	-33	21.5	12820.5	25	2.14501	2.7704	0.474359	piRNA	dmel	9708709	dcr2-het_rep1
chr2L:20205603-20205675	72	-3.31521	0.997823	0.991177	0.499953	25	0.832353	0.114706	25.6667	-0.333333	0	0.583333	1.71696	-17.1	-0.666667	0.612245	-33	-26.9	-33	25.5	652941	10	1.20368	2.1478	0.276471	piRNA	dmel	9708709	dcr2-het_rep1
chr2L:20205783-20206091	308	-6.53635	0.992726	0.943182	0.391821	25	0.551136	0.445076	25	2.64427	22727.3	0.551948	1.26001	-54.9	1.46667	0	-33	0	-33	26.5	314394	10	2.35047	2.47436	0.422349	piRNA	dmel	9708709	dcr2-het_rep1
chr2L:20206247-20209440	3193	-23.4762	0.999432	0.884391	0.482607	24	0.698031	0.173414	25.5	0.939449	11123.3	0.677732	1.92565	-1102.2	-0.150489	0	-33	0	-33	25.5	240883	10	0.647857	1.81117	0.389132	piRNA	dmel	9708709	dcr2-het_rep1
chr2L:20209598-20209685	87	-0.423709	0.889255	0.851852	0.293678	26	0.777778	0.481482	24.5	-33	0	0.505747	0.254739	-13.7	-33	0.52381	-33	-13.7	-33	25	185185	12	0.574672	2.35047	0.62963	piRNA	dmel	9708709	dcr2-het_rep1
chr2L:20209988-20211738	1750	-12.9809	0.988384	0.972812	0.328538	24	0.823607	0.348806	24	0.569495	3978.78	0.569143	1.27235	-355.2	-0.65157	0	-33	0	-33	24.5	117374	10	2.35047	0.670931	0.438992	piRNA	dmel	9708709	dcr2-het_rep1
chr2L:20211847-20212833	986	-12.4887	0.99181	0.980082	0.367029	25	0.872253	0.28022	25	1.97794	8241.76	0.612576	1.18603	-217.8	0.377278	0	-33	0	-33	25.5	217033	10	2.48243	0.499295	0.338599	piRNA	dmel	9708709	dcr2-het_rep1
chr2L:20213918-20214028	110	-3.05933	0.991054	0.948148	0.376654	23	0.851852	0.318518	27	1.19737	14814.8	0.472727	2.68499	-14.1	-33	0.617647	-33	-14.1	-33	26.5	259259	10	0.834395	2.48243	0.474074	piRNA	dmel	9708709	dcr2-het_rep1
chr2L:20214137-20216976	2839	-12.9493	0.998457	0.797852	0.42657	24	0.582031	0.474609	27	-0.460348	976.562	0.660092	1.66578	-898.1	1.11406	0	-33	0	-33	25.5	274414	10	2.77507	1.86566	0.628906	piRNA	dmel	9708709	dcr2-het_rep1
chr2L:20217140-20218196	1056	-5.65647	0.99246	0.709534	0.511722	25	0.725055	0.0886918	26	-0.471405	0	0.672349	2.95367	-382	-0.333333	0	-33	0	-33	25.5	124168	10	2.01605	2.35047	0.465632	piRNA	dmel	9708709	dcr2-het_rep1
chr2L:20218346-20219514	1168	-10.4174	0.991306	0.540419	0.364553	25	0.423653	0.377246	27	1.8935	28443.1	0.535959	1.27788	-238.1	0.764719	0	-33	0	-33	24.5	191617	10	0.268559	2.9647	0.667665	piRNA	dmel	9708709	dcr2-het_rep1
chr2L:20219621-20219987	366	-5.09231	0.990312	0.502242	0.463406	23	0.421525	0.479821	24	-0.349428	4484.31	0.508197	0.829462	-81.3	-0.333333	0	-33	0	-33	24.5	300448	10	1.09881	3.39405	0.869955	piRNA	dmel	9708709	dcr2-het_rep1
chr2L:20220133-20220440	307	-4.73304	0.992451	0.577061	0.370917	25	0.494624	0.261649	22	-0.494506	0	0.514658	0.345374	-52.1	-0.503953	0	-33	0	-33	26.5	293907	10	0.515517	3.19256	0.616487	piRNA	dmel	9708709	dcr2-het_rep1
chr2L:20220548-20220620	72	-1.23118	0.967023	0.612245	0.486684	24	0.387755	0.265306	26	-0.596285	0	0.527778	0.160623	-13.1	-33	0.515464	-0.503953	-19.8	-0.39052	25.5	489796	10	3.00327	1.64533	0.877551	piRNA	dmel	9708709	dcr2-het_rep1
chr2L:20220726-20221312	586	-3.38274	0.996505	0.887931	0.448349	25	0.469828	0.193966	20	-0.471405	0	0.610922	1.72445	-103.5	-33	0	-33	0	-33	25.5	81896.6	18.5	2.01605	-33	0.418103	piRNA	dmel	9708709	dcr2-het_rep1
chr2R:5044081-5044482	401	-4.18261	0.996382	0.987421	0.433643	24	0.773585	0.415094	25.2	2.66667	6289.31	0.653367	1.64533	-114.1	0.0532058	0	-33	0	-33	24.3333	69182.4	10	0.331316	0.331588	0.490566	piRNA	dmel	9708709	dcr2-het_rep1
chr2R:5048590-5049658	1068	-1.34258	0.991905	0.903846	0.388178	25	0.75	0.211538	24.5	-33	0	0.610487	1.80455	-290.6	-33	0	-33	0	-33	-33	-33	-33	0.457943	1.64533	0.769231	piRNA	dmel	9708709	dcr2-het_rep1
chr2R:6258939-6260331	1392	-3.13312	0.990454	0.961039	0.373628	24	0.766234	0.545454	24	-0.333333	0	0.607759	2.6213	-379.7	-33	0	-33	0	-33	24.875	12987	20.5	-0.43186	2.61383	0.714286	piRNA	dmel	9708709	dcr2-het_rep1
chr2R:6261929-6264605	2676	-4.12923	0.990521	0.955414	0.495102	24	0.738854	0.242038	24	-33	0	0.640508	2.86307	-918.5	-0.65157	0	-33	0	-33	25.25	12738.9	NA	1.64533	2.35047	0.821656	piRNA	dmel	9708709	dcr2-het_rep1
chr2R:6269628-6270537	909	-3.60233	0.989363	0.8125	0.403161	25	0.671875	0.25	26	-0.503953	0	0.514852	2.00835	-187	-33	0	-33	0	-33	25	31250	28	2.35047	1.64533	0.875	piRNA	dmel	9708709	dcr2-het_rep1
chr2R:6272931-6279085	6154	-4.94995	0.99948	0.690476	0.475494	23	0.410714	0.428571	28	-33	0	0.608385	1.68806	-2056.9	-33	0	-33	0	-33	25.5	59523.8	14.5	1.64533	-33	0.946429	piRNA	dmel	9708709	dcr2-het_rep1
chr2R:6279231-6282218	2987	-2.59598	0.988258	0.790476	0.421781	24	0.628571	0.314286	21	-33	0	0.624707	1.44602	-940.87	-0.503953	0	-33	0	-33	25.5	38095.2	12	3.39405	-33	0.885714	piRNA	dmel	9708709	dcr2-het_rep1
chr2R:6282333-6289315	6982	-3.99258	0.994374	0.613861	0.464875	23	0.5	0.336634	22	-0.503953	0	0.604984	1.42014	-2132.5	-0.333333	0	-33	0	-33	25.75	29703	10	1.64533	2.35047	0.920792	piRNA	dmel	9708709	dcr2-het_rep1
chr2R:6292563-6297055	4492	-4.30195	0.958748	0.636986	0.33224	24	0.178082	0.424658	24.5	-33	0	0.576135	3.16023	-1203	-33	0	-33	0	-33	26.25	27397.3	10	3.19256	-33	0.856164	piRNA	dmel	9708709	dcr2-het_rep1
chr2R:6299332-6301374	2042	-1.49829	0.973086	0.607143	0.473037	24	0.392857	0.25	24.5	-33	0	0.632713	1.24781	-584.6	-33	0	-33	0	-33	24.5	53571.4	NA	2.73274	-33	0.964286	piRNA	dmel	9708709	dcr2-het_rep1
chr2R:6307959-6309449	1490	-2.62827	0.987483	0.907563	0.462317	25	0.731092	0.344538	20	-0.333333	0	0.64698	2.39239	-480.8	-33	0	-33	0	-33	24.5	75630.2	19	0.0739822	3.39405	0.781513	piRNA	dmel	9708709	dcr2-het_rep1
chr2R:6317833-6319134	1301	-7.61249	0.991009	0.982301	0.434078	24	0.851032	0.20354	25	1.33333	1474.93	0.53651	1.64533	-297.3	-0.596285	0	-33	0	-33	23.5	23598.8	5	0.718404	0.871147	0.511799	piRNA	dmel	9708709	dcr2-het_rep1
chr2R:6320206-6322173	1967	-3.0405	0.980593	0.679612	0.425452	25	0.61165	0.300971	24.5	-33	0	0.626335	2.23579	-630.4	-33	0	-33	0	-33	26	48543.7	10	0.00227722	2.29556	0.786408	piRNA	dmel	9708709	dcr2-het_rep1
chr2R:6323114-6325149	2035	-2.3994	0.988005	0.564516	0.388517	23	0.516129	0.322581	24.5	-33	0	0.57887	2.14106	-477.1	-33	0	-33	0	-33	25	129032	10	2.35047	-33	0.903226	piRNA	dmel	9708709	dcr2-het_rep1
chr2R:6327111-6328288	1177	-2.03918	0.93632	0.895522	0.422336	24	0.686567	0.313433	24.5	-33	0	0.591334	1.85263	-289.5	-0.333333	0	-33	0	-33	24.6667	59701.5	10	0.206804	1.64533	0.880597	piRNA	dmel	9708709	dcr2-het_rep1
chr2R:6331352-6334705	3353	-6.52106	0.990737	0.994012	0.364636	24	0.766467	0.323353	24.5	-33	0	0.657918	1.91558	-850.5	-0.333333	0	-33	0	-33	-33	-33	-33	-0.0962252	2.35047	0.91018	piRNA	dmel	9708709	dcr2-het_rep1
chr2R:6334806-6336196	1390	-4.03855	0.971683	0.981308	0.338507	24	0.897196	0.261682	24.5	-33	0	0.611511	1.44284	-341.3	-0.471405	0	-33	0	-33	-33	-33	-33	0.530901	2.7923	0.813084	piRNA	dmel	9708709	dcr2-het_rep1
chr2R:6347783-6348885	1102	-1.07304	0.994866	0.867924	0.476835	23	0.792453	0.283019	22	-33	0	0.586207	3.39405	-290.6	-0.471405	0	-33	0	-33	24	37735.8	7.5	1.34231	2.35047	0.886792	piRNA	dmel	9708709	dcr2-het_rep1
chr2R:6363682-6367391	3709	-4.78917	0.997481	0.62	0.344752	25	0.56	0.45	24.5	-0.333333	0	0.606093	0.923859	-751.8	-33	0	-33	0	-33	25	40000	13.5	1.02091	2.90856	0.98	piRNA	dmel	9708709	dcr2-het_rep1
chr2R:6367688-6368392	704	-2.14887	0.982265	0.941667	0.440695	24	0.65	0.508333	24.5	-0.333333	0	0.573864	3.39405	-175.9	-33	0	-33	0	-33	25.5	183333	10	0.327645	-33	0.566667	piRNA	dmel	9708709	dcr2-het_rep1
chr2R:6370700-6374409	3709	-4.15821	0.993885	0.548872	0.348486	24	0.496241	0.526316	22	-33	0	0.607711	1.63133	-758.1	-33	0	-33	0	-33	26	60150.4	10	2.77507	-33	0.917293	piRNA	dmel	9708709	dcr2-het_rep1
chr2R:6374706-6375410	704	-2.31928	0.983988	0.942446	0.437712	24	0.71223	0.489209	24.5	-0.333333	0	0.573864	2.77507	-175.9	-33	0	-33	0	-33	25	115108	10	-0.458642	3.39405	0.510791	piRNA	dmel	9708709	dcr2-het_rep1
chr2R:6381876-6383016	1140	-4.062	0.934216	0.900763	0.406747	23	0.679389	0.458015	25	-33	0	0.6	2.27606	-263.1	-33	0	-33	0	-33	25.5	38167.9	6	0.0327354	1.64533	0.656489	piRNA	dmel	9708709	dcr2-het_rep1
chr2R:6383262-6384727	1465	-6.13963	0.995651	0.942857	0.406264	24	0.765079	0.396825	24.5	-0.333333	0	0.641638	1.46561	-344.6	-33	0	-33	0	-33	24.5	82539.7	10	3.00327	0.259178	0.536508	piRNA	dmel	9708709	dcr2-het_rep1
chr2R:6385695-6391511	5816	-8.47821	0.989374	0.966038	0.422399	24	0.815094	0.256604	24.5	-33	0	0.666781	1.76584	-1778.8	-33	0	-33	0	-33	-33	-33	-33	0.599012	3.39405	0.909434	piRNA	dmel	9708709	dcr2-het_rep1
chr2R:6392462-6393843	1381	-5.96853	0.995825	0.933775	0.422508	24	0.63245	0.387417	25	-0.0373262	3311.26	0.619841	2.25327	-314.1	0.609284	0	-33	0	-33	25	33112.6	26	1.64533	1.08004	0.576159	piRNA	dmel	9708709	dcr2-het_rep1
chr2R:6393953-6398739	4786	-9.8254	0.989807	0.547988	0.389556	25	0.458204	0.421053	26	2.66667	3095.97	0.624739	2.3489	-1011.1	-0.503953	0	-33	0	-33	25.5	160991	10	0.947609	3.39405	0.820433	piRNA	dmel	9708709	dcr2-het_rep1
chr2R:6400543-6400992	449	-2.23462	0.914291	0.666667	0.474845	24	0.166667	0.533333	24.5	-33	0	0.525613	2.0049	-114.3	-33	0	-33	0	-33	25	66666.7	4	3.39405	-33	0.9	piRNA	dmel	9708709	dcr2-het_rep1
chr2R:6401106-6401623	517	-3.76892	0.972624	0.517857	0.440395	24	0.357143	0.428571	27	-0.333333	0	0.529981	0.469171	-112.6	-0.503953	0	-33	0	-33	26	142857	10	3.00327	-33	0.964286	piRNA	dmel	9708709	dcr2-het_rep1
chr2R:6402126-6402340	214	-1.29753	0.886523	0.681818	0.356284	25	0.636364	0.545454	24.5	-33	0	0.551402	2.68086	-36.6	-33	0.5	-33	0	-33	25.3333	90909.1	9	2.90856	-33	0.954546	piRNA	dmel	9708709	dcr2-het_rep1
chr2R:6402768-6409213	6445	-8.31636	0.992212	0.574468	0.343954	25	0.578014	0.450355	28	-0.333333	0	0.608534	1.53679	-1333	-33	0	-33	0	-33	24	39007.1	10	1.3901	1.64533	0.929078	piRNA	dmel	9708709	dcr2-het_rep1
chr2R:6419058-6420016	958	-3.21911	0.994436	0.67052	0.413723	24	0.531792	0.271676	24.5	-0.484849	0	0.561587	1.1739	-231	0.843274	0	-33	0	-33	26	127168	18.5	1.64533	2.35047	0.641618	piRNA	dmel	9708709	dcr2-het_rep1
chr2R:6420149-6420377	228	-1.55322	0.971211	0.564103	0.467185	24	0.307692	0.384615	24	-0.333333	0	0.596491	1.52958	-58.7	-33	0.545454	-33	-19.5	-33	25.5	102564	12	2.90856	-33	0.948718	piRNA	dmel	9708709	dcr2-het_rep1
chr2R:6421857-6423264	1407	-9.02102	0.994625	0.911243	0.395354	24	0.647929	0.467456	26	1.51186	8875.74	0.64108	1.60358	-368	-0.471405	0	-33	0	-33	25.5	100592	10	1.64533	1.74483	0.721893	piRNA	dmel	9708709	dcr2-het_rep1
chr2R:6423522-6424024	502	-5.04083	0.99007	0.851648	0.442626	25	0.483517	0.428571	24.2	-0.666667	0	0.573705	1.89834	-129.4	-0.333333	0	-33	0	-33	25	98901.1	8	2.90856	1.88814	0.846154	piRNA	dmel	9708709	dcr2-het_rep1
chr2R:6424579-6426052	1473	-6.94062	0.989123	0.568702	0.40567	25	0.408397	0.431298	25.4	-0.611775	0	0.568907	0.64058	-352.2	-0.333333	0	-33	0	-33	25.5	152672	10	1.59458	3.28664	0.870229	piRNA	dmel	9708709	dcr2-het_rep1
chr2R:6426157-6426385	228	-2.2928	0.92392	0.578947	0.38296	24	0.385965	0.245614	25	-33	0	0.587719	0.489327	-47.8	-33	0.609756	-33	-19	-33	24.5	385965	10	3.19256	-33	0.649123	piRNA	dmel	9708709	dcr2-het_rep1
chr2R:6426546-6426740	194	-2.17092	0.983945	0.641509	0.401602	25	0.226415	0.415094	22.6667	-0.471405	0	0.57732	2.16918	-37.5	-33	0.547368	-33	-15.4	-33	25.5	150943	10	2.71163	1.64533	0.830189	piRNA	dmel	9708709	dcr2-het_rep1
chr2R:6426965-6427659	694	-2.72573	0.9881	0.775701	0.451946	25	0.616822	0.214953	23	-33	0	0.642651	1.86064	-196.8	-33	0	-33	0	-33	25.5	56074.8	20	-0.437505	3.00327	0.841121	piRNA	dmel	9708709	dcr2-het_rep1
chr2R:6427762-6429781	2019	-4.2618	0.953147	0.503937	0.393227	25	0.480315	0.338583	22	-33	0	0.582467	2.42204	-483.4	-33	0	-33	0	-33	25.5	39370.1	20	1.64533	1.64533	0.866142	piRNA	dmel	9708709	dcr2-het_rep1
chr2R:6429922-6434274	4352	-9.55096	0.986081	0.799054	0.375793	24	0.723404	0.356974	26.3333	-0.333333	0	0.607996	1.7512	-1110.8	-0.333333	0	-33	0	-33	26.5	59101.7	10	2.35203	1.64533	0.747045	piRNA	dmel	9708709	dcr2-het_rep1
chr2R:6434753-6435274	521	-1.02245	0.974054	0.847826	0.405229	26	0.673913	0.23913	24.5	-0.503953	0	0.660269	2.71163	-118.5	-0.333333	0	-33	0	-33	-33	-33	-33	0.297329	2.90856	0.913044	piRNA	dmel	9708709	dcr2-het_rep1
chr2R:6435491-6436076	585	-3.07926	0.980386	0.742268	0.445259	24	0.72165	0.298969	25	-0.942809	0	0.622222	2.82405	-163.4	-0.503953	0	-33	0	-33	24.5	185567	13	1.04415	3.19256	0.762887	piRNA	dmel	9708709	dcr2-het_rep1
chr2R:6436195-6447070	10875	-17.7961	0.999528	0.660931	0.442639	25	0.564777	0.26417	22	-0.19676	7085.02	0	-33	0	-33	0	-33	0	-33	24.5	84008.1	10	1.5312	2.90856	0.822874	piRNA	dmel	9708709	dcr2-het_rep1
chr2R:6447300-6449795	2495	-5.13895	0.980926	0.544	0.403834	25	0.576	0.272	26	-0.333333	0	0.638878	1.9829	-667.6	-33	0	-33	0	-33	25.5	160000	10	2.48243	-33	0.888	piRNA	dmel	9708709	dcr2-het_rep1
chr2R:6451536-6456127	4591	-5.62519	0.992406	0.718518	0.481927	24	0.414815	0.392593	24.5	-0.333333	0	0.629057	1.31965	-1598.3	-0.503953	0	-33	0	-33	24.75	59259.3	18.3333	1.1088	-33	0.948148	piRNA	dmel	9708709	dcr2-het_rep1
chr2R:6456277-6459368	3091	-4.70053	0.931689	0.745098	0.505417	24	0.529412	0.205882	24	2.66667	9803.92	0.652216	2.63195	-1160.6	-33	0	-33	0	-33	25.8	19607.8	19	0.965687	2.90856	0.921569	piRNA	dmel	9708709	dcr2-het_rep1
chr2R:6459571-6460483	912	-1.98497	0.945398	0.758621	0.405317	25	0.724138	0.275862	24.5	-33	0	0.629386	1.64533	-260.2	-33	0	-33	0	-33	25	68965.5	NA	2.58705	1.64533	0.862069	piRNA	dmel	9708709	dcr2-het_rep1
chr2R:6461267-6461566	299	-1.42397	0.92276	0.6875	0.374362	23	0.53125	0.3125	25	-33	0	0.575251	2.87814	-72.5	-33	0.533333	-33	-16.7	-33	24.5	281250	10.5	0.766332	-33	0.84375	piRNA	dmel	9708709	dcr2-het_rep1
chr2R:6461714-6462146	432	-1.83709	0.98411	0.805556	0.445068	25	0.694444	0.166667	25.3333	-0.333333	0	0.606482	2.1516	-113.8	-0.333333	0	-33	0	-33	-33	-33	-33	2.35047	-33	0.888889	piRNA	dmel	9708709	dcr2-het_rep1
chr2R:6469712-6471166	1454	-7.0284	0.999658	0.527076	0.463406	24	0.361011	0.436823	26	0.689997	21660.7	0.535076	2.13107	-351	-33	0	-33	0	-33	25.5	122744	10	1.78616	1.64533	0.743682	piRNA	dmel	9708709	dcr2-het_rep1
chr2R:6471378-6472342	964	-4.78749	0.990758	0.816176	0.510587	25	0.367647	0.455882	23	0.170716	7352.94	0.607884	1.26342	-290	0.471405	0	-33	0	-33	25.25	102941	10	1.22248	1.64533	0.889706	piRNA	dmel	9708709	dcr2-het_rep1
chr2R:6473791-6474262	471	-1.47412	0.993917	0.55	0.434932	24	0.35	0.4	24.5	-33	0	0.585987	2.1478	-96.2	-33	0	-33	0	-33	25.4	100000	10	-33	-33	1	piRNA	dmel	9708709	dcr2-het_rep1
chr2R:6475932-6476357	425	-0.771741	0.9274	0.594595	0.379827	23	0.432432	0.486486	24.5	-33	0	0.564706	2.22572	-95.1	-33	0	-33	0	-33	25	270270	10	1.64533	-33	0.864865	piRNA	dmel	9708709	dcr2-het_rep1
chr2R:6478330-6478747	417	-2.53185	0.990495	0.685185	0.331891	25	0.194444	0.555556	24	-0.333333	0	0.551559	0.234106	-79.9	-0.333333	0	-33	0	-33	25.5	555556	10	2.90856	1.64533	0.546296	piRNA	dmel	9708709	dcr2-het_rep1
chr2R:6478857-6479123	266	-3.87338	0.993109	0.747826	0.395158	25	0.2	0.530435	24.5	0.942809	8695.65	0.56391	1.35749	-54.7	-33	0.519231	-33	-19.8	-33	25.5	965217	10	2.35047	1.64533	0.46087	piRNA	dmel	9708709	dcr2-het_rep1
chr2R:6479226-6479610	384	-3.70122	0.994082	0.679612	0.353656	24	0.553398	0.417476	26	1.76383	9708.74	0.520833	0.572691	-51.7	-0.333333	0	-33	0	-33	24	165048	10	1.71646	2.35047	0.76699	piRNA	dmel	9708709	dcr2-het_rep1
chr2R:6479892-6480238	346	-1.93652	0.98544	0.61017	0.43624	26	0.254237	0.271186	24.5	-33	0	0.479769	2.72793	-61.9	-33	0	-33	0	-33	27.5	135593	11.6	2.35047	-33	0.847458	piRNA	dmel	9708709	dcr2-het_rep1
chr2R:6483835-6484146	311	-2.66405	0.949117	0.694737	0.313564	25	0.431579	0.442105	24.5	-33	0	0.553055	1.19524	-61.4	-33	0	-33	0	-33	26	315790	10	2.73275	-33	0.578947	piRNA	dmel	9708709	dcr2-het_rep1
chr2R:6484549-6485249	700	-2.07166	0.970905	0.885714	0.371937	24	0.257143	0.428571	23.6667	2.66667	14285.7	0.577143	1.64533	-150.3	2.66667	0	-33	0	-33	26	42857.1	24.5	2.48331	-33	0.728571	piRNA	dmel	9708709	dcr2-het_rep1
chr2R:6487985-6488025	40	-0.525178	0.926756	0.65	0.43947	24	0.7	0.15	24.5	-33	0	0.45	2.35047	NA	-33	0.517241	-33	0	-33	26	700000	10	3.19256	-33	0.7	piRNA	dmel	9708709	dcr2-het_rep1
chr2R:6488206-6488231	25	-0.398391	0.896551	0.75	0.442003	24	0.3125	0.375	24.5	-33	0	0.32	1.64533	NA	-33	0.45614	-33	0	-33	25.5	875000	10	-33	-33	0.5625	piRNA	dmel	9708709	dcr2-het_rep1
chr2R:6488636-6488733	97	-0.585894	0.932083	0.939394	0.282967	24	0.151515	0.333333	24.5	-33	0	0	0.0723372	-17.7	-33	0.529412	-33	-19.2	-33	24.5	333333	10	-33	-33	0.545454	piRNA	dmel	9708709	dcr2-het_rep1
chr2R:6488890-6490908	2018	-11.6529	0.979406	0.810044	0.443183	24	0.292576	0.502183	25.5	0.480403	10917	0.540139	3.19449	-559.2	-0.333333	0	-33	0	-33	25	54585.2	10	2.71163	2.48243	0.79476	piRNA	dmel	9708709	dcr2-het_rep1
chr2R:6494579-6499176	4597	-6.01061	0.998434	0.939759	0.418786	24	0.795181	0.2249	24.5	-0.333333	0	0.673048	2.90856	-1437.6	-33	0	-33	0	-33	27	16064.3	10	1.64533	3.39405	0.915663	piRNA	dmel	9708709	dcr2-het_rep1
chr3L:20330243-20330911	668	-1.62444	0.908457	0.971429	0.360338	24	0.914286	0.285714	24.5	-33	0	0.63473	0.0606364	-150.4	-33	0	-33	0	-33	25.4	57142.9	10	0.260514	3.39405	0.914286	piRNA	dmel	9708709	dcr2-het_rep1
chr3L:20331015-20332463	1448	-2.3671	0.989362	0.971429	0.3957	24	0.814286	0.342857	24	-33	0	0.588398	0.281781	-330.5	-33	0	-33	0	-33	-33	-33	-33	0.620351	3.39405	0.957143	piRNA	dmel	9708709	dcr2-het_rep1
chr3L:20332817-20333940	1123	-4.89595	0.985198	0.984615	0.395482	25	0.892308	0.215385	24.5	-33	0	0.653606	1.23097	-271.2	-0.333333	0	-33	0	-33	-33	-33	-33	0.187783	2.90856	0.861538	piRNA	dmel	9708709	dcr2-het_rep1
chr3L:24764830-24765358	528	-2.22154	0.98782	0.963636	0.373383	24	0.672727	0.581818	24.5	-33	0	0.534091	0.932258	-121.1	-0.333333	0	-33	0	-33	25.6667	72727.3	10	0.780925	1.64533	0.763636	piRNA	dmel	9708709	dcr2-het_rep1
chr3L:24765495-24766005	510	-1.64962	0.986295	0.939394	0.378429	25	0.621212	0.363636	24.5	-33	0	0.588235	1.92707	-107.4	-33	0	-33	0	-33	24.6667	30303	10	0.503321	-33	0.621212	piRNA	dmel	9708709	dcr2-het_rep1
chr3L:24777881-24782336	4455	-5.74624	0.957607	0.95082	0.494773	24	0.688525	0.224044	24.5	-33	0	0.668911	2.90856	-1668.8	0.251976	0	-33	0	-33	-33	-33	-33	0.337507	1.97663	0.879781	piRNA	dmel	9708709	dcr2-het_rep1
chr3L:24803980-24804316	336	-0.827648	0.921853	0.774193	0.515896	23	0.677419	0.258064	25	-0.503953	0	0.571429	3.19256	-74.5	-33	0	-33	0	-33	24.1429	64516.1	22.6667	2.48975	-33	0.903226	piRNA	dmel	9708709	dcr2-het_rep1
chr3L:24822539-24827591	5052	-4.42614	0.998573	0.937799	0.494129	24	0.698565	0.177034	24	-0.333333	0	0.665875	3.39405	-1877.3	2.02468	0	-33	0	-33	27	19138.8	16.6667	-0.0843726	2.48331	0.880383	piRNA	dmel	9708709	dcr2-het_rep1
chr3L:24831324-24834353	3029	-5.30239	0.994969	0.975758	0.421069	24	0.775758	0.242424	21	-33	0	0.668868	1.64533	-942	-0.333333	0	-33	0	-33	23.25	24242.4	9.5	-0.683095	2.90856	0.90303	piRNA	dmel	9708709	dcr2-het_rep1
chr3L:25289828-25291539	1711	-4.89221	0.995184	0.966216	0.510582	25	0.736487	0.101351	25	-33	0	0.666277	1.90037	-645.8	0.438397	0	-33	0	-33	25.5	54054.1	10	0.168305	-33	0.77027	piRNA	dmel	9708709	dcr2-het_rep1
chr3L:25326918-25331013	4095	-5.77545	0.992078	0.977143	0.423167	24	0.782857	0.257143	24.5	-33	0	0.681319	2.35047	-1268	-33	0	-33	0	-33	24	22857.1	16	0.520924	2.35047	0.897143	piRNA	dmel	9708709	dcr2-het_rep1
chr3L:25359933-25362317	2384	-2.38919	0.979997	0.631579	0.473596	24	0.333333	0.508772	24.5	-33	0	0.606544	2.93369	-733.2	-33	0	-33	0	-33	24.5	35087.7	15	2.35047	-33	0.947368	piRNA	dmel	9708709	dcr2-het_rep1
chr3L:25363497-25366497	3000	-2.36116	0.99136	0.881579	0.505166	24	0.618421	0.342105	24.5	-0.333333	0	0.613333	3.39405	-991.6	-0.333333	0	-33	0	-33	23	52631.6	30	1.12426	-33	0.921053	piRNA	dmel	9708709	dcr2-het_rep1
chr3L:25369006-25369817	811	-2.57017	0.995783	0.928571	0.452116	24	0.557143	0.457143	24.5	-0.333333	0	0.633786	1.71617	-237	-0.471405	0	-33	0	-33	26.25	28571.4	29	1.54622	-33	0.885714	piRNA	dmel	9708709	dcr2-het_rep1
chr3L:25370493-25371247	754	-1.64521	0.941372	0.857143	0.458666	23	0.357143	0.5	27	-0.333333	0	0.628647	1.54917	-207.2	-33	0	-33	0	-33	25	47619.1	29	1.64533	-33	0.97619	piRNA	dmel	9708709	dcr2-het_rep1
chr3L:25371365-25372467	1102	-3.9208	0.990977	0.95614	0.507291	24	0.526316	0.342105	28	-33	0	0.666062	1.64533	-361.2	-0.438397	0	-33	0	-33	23.5	35087.7	NA	-0.126301	2.90856	0.912281	piRNA	dmel	9708709	dcr2-het_rep1
chr3L:25372599-25372964	365	-1.30202	0.940381	0.868421	0.458259	26	0.552632	0.342105	27	-0.333333	0	0.657534	2.22532	-92.1	-33	0	-33	0	-33	-33	-33	-33	0.982655	2.35047	0.973684	piRNA	dmel	9708709	dcr2-het_rep1
chr3L:25429918-25432108	2190	-2.00905	0.974833	0.754717	0.505683	25	0.396226	0.433962	24.5	-33	0	0.586301	3.19256	-662.2	-33	0	-33	0	-33	24	37735.8	8	2.13896	-33	0.981132	piRNA	dmel	9708709	dcr2-het_rep1
chr3L:25432302-25435693	3391	-2.79489	0.99094	0.75	0.499264	25	0.529412	0.367647	24.5	-33	0	0.604541	3.39405	-1114.1	-0.503953	0	-33	0	-33	24.6667	29411.8	16.3333	2.13896	-33	0.955882	piRNA	dmel	9708709	dcr2-het_rep1
chr3L:25446922-25451866	4944	-1.25518	0.987273	0.717949	0.458409	25	0.410256	0.333333	24.5	-33	0	0.507282	2.24805	-1088.4	-33	0	-33	0	-33	24.75	51282.1	18	1.64533	-33	1	piRNA	dmel	9708709	dcr2-het_rep1
chr3L:26064428-26068359	3931	-2.94433	0.990009	0.905405	0.529208	24	0.702703	0.189189	24.5	-33	0	0.656322	2.35047	-1458.1	-33	0	-33	0	-33	26	40540.5	10	0.797522	-33	0.891892	piRNA	dmel	9708709	dcr2-het_rep1
chr3L:26087397-26092591	5194	-6.08214	0.995085	0.927083	0.45363	24	0.677083	0.239583	24.5	-33	0	0.630343	1.64533	-1671.8	-0.333333	0	-33	0	-33	-33	-33	-33	0.776102	-33	0.958333	piRNA	dmel	9708709	dcr2-het_rep1
chr3L:26099645-26115570	15925	-11.3307	0.994659	0.955789	0.478828	24	0.694737	0.227368	24.5	-33	0	0	-33	0	-33	0	-33	0	-33	24.8182	4210.53	10	-0.579458	2.61383	0.913684	piRNA	dmel	9708709	dcr2-het_rep1
chr3L:26136617-26136667	50	-1.00954	0.919866	0.521739	0.481196	25	0.130435	0.130435	24.5	-0.333333	0	0.52	2.4371	-11.9	-33	0.541667	-33	-14.4	-33	25	739130	10	2.35047	-33	0.956522	piRNA	dmel	9708709	dcr2-het_rep1
chr3L:26136871-26137032	161	-1.72769	0.856491	0.793651	0.392841	26	0.111111	0.333333	27	-0.333333	0	0.596273	2.40892	-49.2	-33	0.571429	-33	-27	-33	26	269841	10	2.48243	-33	0.52381	piRNA	dmel	9708709	dcr2-het_rep1
chr3L:26137418-26138134	716	-2.40477	0.928702	0.615385	0.51012	24	0.307692	0.435897	24.5	-0.333333	0	0.625698	1.91753	-229.4	-33	0	-33	0	-33	24.5	102564	12	2.90856	-33	0.871795	piRNA	dmel	9708709	dcr2-het_rep1
chr3L:26138290-26139324	1034	-2.23707	0.91955	0.705882	0.465744	24	0.470588	0.470588	20	-33	0	0.597679	2.44584	-323.6	-33	0	-33	0	-33	25.25	58823.5	10	2.90856	-33	0.803922	piRNA	dmel	9708709	dcr2-het_rep1
chr3L:26139867-26143998	4131	-6.59781	0.991746	0.979839	0.433642	24	0.822581	0.205645	24.5	-33	0	0.67877	2.06891	-1286.8	-0.333333	0	-33	0	-33	27	24193.5	10	0.416614	2.35047	0.875	piRNA	dmel	9708709	dcr2-het_rep1
chr3L:26146792-26151019	4227	-5.19376	0.995774	0.980861	0.436149	24	0.822967	0.244019	24.5	-33	0	0.670925	2.35047	-1326.1	-0.333333	0	-33	0	-33	24.5	9569.38	NA	-0.343462	2.35047	0.856459	piRNA	dmel	9708709	dcr2-het_rep1
chr3L:26156067-26159748	3681	-5.22351	0.994519	0.983696	0.419638	24	0.831522	0.217391	24.5	-33	0	0.67699	1.74389	-1148.2	-0.333333	0	-33	0	-33	26	10869.6	11	0.309671	2.35047	0.869565	piRNA	dmel	9708709	dcr2-het_rep1
chr3L:26766119-26766429	310	-0.996781	0.944715	0.8125	0.394353	25	0.28125	0.4375	24.5	-33	0	0.464516	2.22532	-60.8	-33	0	-33	0	-33	24	125000	NA	2.22532	-33	0.875	piRNA	dmel	9708709	dcr2-het_rep1
chr3L:26767179-26767630	451	-2.35354	0.97893	0.720588	0.535736	25	0.720588	0.235294	24.5	-33	0	0.629712	1.24145	-133.8	1.33333	0	-33	0	-33	26.5	264706	10	2.01605	2.35047	0.691176	piRNA	dmel	9708709	dcr2-het_rep1
chr3L:26767751-26768881	1130	-5.04198	0.995926	0.629032	0.541187	23	0.564516	0.370968	23.6667	-0.503953	0	0.60354	1.71928	-391.6	-33	0	-33	0	-33	22.5	21505.4	10	1.53565	3.00327	0.77957	piRNA	dmel	9708709	dcr2-het_rep1
chr3L:26769049-26769767	718	-4.23315	0.994963	0.697248	0.596939	24	0.293578	0.211009	25.3333	-0.764719	0	0.651811	1.74321	-268.1	-33	0	-33	0	-33	25	45871.6	27	1.5412	1.64533	0.899083	piRNA	dmel	9708709	dcr2-het_rep1
chr3L:26774578-26774890	312	-1.0835	0.898041	0.545454	0.452579	23	0.318182	0.727273	25	-33	0	0.442308	2.61383	-55.4	-33	0	-33	0	-33	23.8333	90909.1	4	2.35047	-33	0.909091	piRNA	dmel	9708709	dcr2-het_rep1
chr3L:26776020-26776471	451	-1.73526	0.981829	0.771429	0.55293	26	0.585714	0.142857	23.5	-0.333333	0	0.616408	1.52526	-136.6	-0.503953	0	-33	0	-33	22.5	28571.4	16	1.64533	2.46363	0.8	piRNA	dmel	9708709	dcr2-het_rep1
chr3L:26776589-26777029	440	-2.36131	0.981886	0.752577	0.525051	23	0.587629	0.42268	27	-0.503953	0	0.577273	2.43965	-128	-33	0	-33	0	-33	25	20618.6	13.75	1.64533	2.73274	0.72165	piRNA	dmel	9708709	dcr2-het_rep1
chr3L:26777155-26779437	2282	-9.64553	0.989207	0.82197	0.528347	24	0.61553	0.198864	24.6667	-0.471405	0	0.593339	1.14703	-748.7	1.31798	0	-33	0	-33	25.5	17045.5	12	1.53169	2.54242	0.736742	piRNA	dmel	9708709	dcr2-het_rep1
chr3L:26779575-26779990	415	-1.48388	0.986995	0.773333	0.546163	25	0.613333	0.186667	24.5	-33	0	0.554217	1.68181	-121.2	-0.629941	0	-33	0	-33	25.6667	26666.7	23	0.466356	-33	0.8	piRNA	dmel	9708709	dcr2-het_rep1
chr3L:26780111-26780602	491	-2.79559	0.996684	0.789474	0.518264	23	0.692982	0.421053	24.5	-0.333333	0	0.598778	1.34198	-141.5	-33	0	-33	0	-33	24.25	35087.7	10	2.35047	3.00327	0.657895	piRNA	dmel	9708709	dcr2-het_rep1
chr3L:26794863-26796348	1485	-3.21179	0.979434	0.847953	0.459445	25	0.584795	0.345029	27	-33	0	0.591246	2.81405	-404	-0.333333	0	-33	0	-33	25	87719.3	10	2.35047	2.48331	0.649123	piRNA	dmel	9708709	dcr2-het_rep1
chr3L:26796733-26798410	1677	-8.65859	0.991002	0.899777	0.522527	24	0.630289	0.218263	23.6	2.66667	2227.17	0.585569	1.58971	-560.5	-0.983124	0	-33	0	-33	25.5	22271.7	8.5	2.35203	2.35047	0.697105	piRNA	dmel	9708709	dcr2-het_rep1
chr3L:26798548-26798963	415	-1.72688	0.984538	0.813333	0.534685	25	0.626667	0.226667	24.5	-33	0	0.554217	2.21811	-121.2	-0.333333	0	-33	0	-33	26	200000	10	1.66519	2.35047	0.773333	piRNA	dmel	9708709	dcr2-het_rep1
chr3L:26799084-26799575	491	-2.22314	0.959583	0.841121	0.533891	23	0.766355	0.317757	25	-33	0	0.598778	2.35931	-141.5	-33	0	-33	0	-33	25	18691.6	15	2.35047	3.00327	0.626168	piRNA	dmel	9708709	dcr2-het_rep1
chr3L:26807842-26809288	1446	-1.91629	0.998485	0.920454	0.444474	24	0.829546	0.306818	24.5	-33	0	0.603043	1.84198	-374.4	-0.333333	0	-33	0	-33	24.5	90909.1	10	0.0407272	1.64533	0.568182	piRNA	dmel	9708709	dcr2-het_rep1
chr3L:26811620-26814150	2530	-5.45778	0.994855	0.944954	0.492152	25	0.697248	0.293578	24.5	-33	0	0.654546	1.64533	-904.9	-0.491473	0	-33	0	-33	24.5	36697.2	10	0.753341	2.35047	0.908257	piRNA	dmel	9708709	dcr2-het_rep1
chr3L:26824986-26825544	558	-4.89743	0.998213	0.993421	0.438518	24	0.746711	0.430921	24	-33	0	0.620072	0.0583305	-157.4	1.33333	0	-33	0	-33	24	72368.4	10	-0.0842658	1.00388	0.470395	piRNA	dmel	9708709	dcr2-het_rep1
chr3L:26829249-26829682	433	-3.88294	0.997941	0.990521	0.426619	24	0.734597	0.582938	21	-33	0	0.655889	0.0364996	-131.9	-0.333333	0	-33	0	-33	25.5	18957.3	9.5	-0.204459	1.22551	0.42654	piRNA	dmel	9708709	dcr2-het_rep1
chr3L:26836760-26841095	4335	-8.10501	0.989864	0.989848	0.348669	25	0.781726	0.28934	24.5	-33	0	0.64083	1.73927	-1081.1	-33	0	-33	0	-33	-33	-33	-33	1.50868	2.71163	0.939086	piRNA	dmel	9708709	dcr2-het_rep1
chr3L:26856126-26859624	3498	-0.777085	0.968741	0.512821	0.361124	22	0.410256	0.435897	24.5	-33	0	0.586621	2.71709	-882.17	-33	0	-33	0	-33	25.5	51282.1	15	2.35047	-33	0.974359	piRNA	dmel	9708709	dcr2-het_rep1
chr3L:26878710-26880951	2241	-6.05503	0.994879	0.505376	0.34202	24	0.548387	0.526882	24.5	-33	0	0.553324	1.86421	-403.1	-0.333333	0	-33	0	-33	25	118280	10	2.71163	-33	0.913979	piRNA	dmel	9708709	dcr2-het_rep1
chr3L:26937201-26938624	1423	-3.91927	0.982644	0.554217	0.349275	25	0.60241	0.46988	24	-33	0	0.562193	1.79019	-247.1	-33	0	-33	0	-33	25.5	120482	10	3.0382	2.22532	0.939759	piRNA	dmel	9708709	dcr2-het_rep1
chr3L:26939006-26952508	13502	-10.3149	0.989213	0.524655	0.328637	25	0.581854	0.465483	25	-0.333333	0	0	-33	0	-33	0	-33	0	-33	25	74950.7	10	1.16831	2.90856	0.930967	piRNA	dmel	9708709	dcr2-het_rep1
chr3L:27867495-27869655	2160	-3.77104	0.986677	0.926829	0.43108	25	0.603658	0.371951	24.5	-33	0	0.589815	3.28664	-549.7	-0.333333	0	-33	0	-33	24.5	24390.2	10	1.64533	2.71163	0.676829	piRNA	dmel	9708709	dcr2-het_rep1
chr3L:27923493-27923697	204	-0.545916	0.884076	0.666667	0.395983	23	0.266667	0.466667	24.5	-33	0	0.617647	2.90856	-49.5	-33	0.313725	-33	0	-33	24.5	266667	10	-33	-33	0.866667	piRNA	dmel	9708709	dcr2-het_rep1
chr3L:27924980-27929174	4194	-6.53312	0.992568	0.633523	0.406173	24	0.5625	0.369318	26	-0.333333	0	0.611826	2.22089	-1066.3	-0.333333	0	-33	0	-33	25.5	59659.1	10	1.71051	2.48243	0.792614	piRNA	dmel	9708709	dcr2-het_rep1
chr3L:27938474-27942591	4117	-8.26611	0.995283	0.68435	0.408729	24	0.586207	0.384615	24.5	-0.471405	0	0.603838	2.54542	-1050.9	-0.472382	0	-33	0	-33	25.5	137931	10	2.51383	3.39405	0.793103	piRNA	dmel	9708709	dcr2-het_rep1
chr3L:27957778-27957926	148	-0.785382	0.898725	0.928571	0.468946	24	0.5	0.142857	24.5	-33	0	0.608108	2.17685	-43.8	-33	0.619048	-33	-21.4	-33	-33	-33	-33	0.724676	-33	0.75	piRNA	dmel	9708709	dcr2-het_rep1
chr3L:27959940-27964365	4425	-9.97065	0.994146	0.550868	0.421601	24	0.516129	0.372208	27	0.952381	4962.78	0.592994	2.54068	-1128.72	-33	0	-33	0	-33	25.5	94292.8	10	0.946187	2.71163	0.83871	piRNA	dmel	9708709	dcr2-het_rep1
chr3L:27965435-27965702	267	-2.16373	0.897599	0.9	0.438785	23	0.68	0.34	24.5	-33	0	0.636704	2.35047	-88.2	-33	0.601942	-33	-26.7	-33	25	120000	10	-0.0466821	1.64533	0.74	piRNA	dmel	9708709	dcr2-het_rep1
chr3R:12467900-12468024	124	-2.16346	0.915638	0.526316	0.366939	24	0.421053	0.631579	24.5	-33	0	0.5	2.42659	-24.4	0.105409	0.476191	-33	-12.3	-33	25.5	491228	10	0.516324	-33	0.719298	piRNA	dmel	9708709	dcr2-het_rep1
chr3R:12468487-12468739	252	-1.67964	0.993357	0.638298	0.323448	25	0.574468	0.234043	25	-0.503953	0	0.412698	2.49301	-44.48	-33	0.472727	-0.333333	0	0.669794	25.5	127660	15	2.59563	2.35047	0.87234	piRNA	dmel	9708709	dcr2-het_rep1
chr3R:12468898-12470404	1506	-9.69762	0.994634	0.662939	0.467118	24	0.397764	0.298722	26	0.774347	23961.7	0.577689	1.69337	-403.4	-33	0	-33	0	-33	25.5	84664.5	10	0.463749	3.39405	0.65655	piRNA	dmel	9708709	dcr2-het_rep1
chr3R:12470508-12472779	2271	-10.741	0.991652	0.578073	0.456596	24	0.471761	0.310631	26	1.46566	29900.3	0.593571	1.95014	-613.6	-33	0	-33	0	-33	26.5	76412	10	0.406344	3.39405	0.654485	piRNA	dmel	9708709	dcr2-het_rep1
chr3R:12472886-12474308	1422	-8.55856	0.997376	0.667826	0.463711	24	0.445217	0.330435	23	-0.035383	3478.26	0.579465	1.3644	-369.6	-0.491473	0	-33	0	-33	25.5	92173.9	10	0.301834	2.90856	0.613913	piRNA	dmel	9708709	dcr2-het_rep1
chr3R:12474497-12474825	328	-1.10141	0.998558	0.942529	0.470241	24	0.678161	0.551724	24.5	-0.333333	0	0.5	1.64533	-79.2	-33	0	-33	0	-33	24.5	114942	12	1.21105	-33	0.632184	piRNA	dmel	9708709	dcr2-het_rep1
chr3R:12474989-12475900	911	-6.32958	0.9966	0.888587	0.480855	24	0.30163	0.255435	22	0.952381	5434.78	0.555434	1.89281	-217.8	-33	0	-33	0	-33	23.6	48913	10	2.48243	1.30682	0.641304	piRNA	dmel	9708709	dcr2-het_rep1
chr3R:12476089-12476417	328	-1.56613	0.997641	0.941176	0.469228	24	0.686275	0.460784	24	-0.471405	0	0.5	2.22532	-79.2	-33	0	-33	0	-33	24.5	205882	10	-0.329852	2.35047	0.627451	piRNA	dmel	9708709	dcr2-het_rep1
chr3R:12476581-12477389	808	-6.57108	0.994246	0.860465	0.474967	24	0.296512	0.264535	26	2.20158	14534.9	0.556931	1.84048	-208	-33	0	-33	0	-33	25.5	104651	10	1.68853	1.58743	0.665698	piRNA	dmel	9708709	dcr2-het_rep1
chr3R:12478171-12478847	676	-5.93944	0.989142	0.724771	0.4128	24	0.385321	0.266055	24	-0.597505	0	0.544379	2.28057	-157.1	-0.333333	0	-33	0	-33	25.5	73394.5	20	1.67314	1.64533	0.889908	piRNA	dmel	9708709	dcr2-het_rep1
chr3R:12479006-12480369	1363	-9.58892	0.996501	0.664903	0.465152	24	0.435626	0.313933	25	0.236628	3527.34	0.579604	1.02064	-370.9	-0.333333	0	-33	0	-33	25	77601.4	10	1.38501	3.39405	0.636684	piRNA	dmel	9708709	dcr2-het_rep1
chr3R:12480528-12480886	358	-2.6642	0.995128	0.880734	0.437044	25	0.59633	0.449541	24.5	-33	0	0.541899	1.08341	-88.6	-33	0	-33	0	-33	24.5	339450	10	0.617396	1.64533	0.59633	piRNA	dmel	9708709	dcr2-het_rep1
chr3R:12481049-12481687	638	-3.1852	0.965677	0.846154	0.49176	24	0.316239	0.247863	24.5	0.611775	8547.01	0.570533	2.21915	-160.9	-0.333333	0	-33	0	-33	24.5	34188	10	1.89738	-33	0.803419	piRNA	dmel	9708709	dcr2-het_rep1
chr3R:12481846-12483697	1851	-7.50452	0.9957	0.656604	0.463824	24	0.488679	0.29434	28	-0.957895	0	0.564019	0.257992	-496.5	-33	0	-33	0	-33	25.5	86792.4	10	0.248376	2.05832	0.641509	piRNA	dmel	9708709	dcr2-het_rep1
chr3R:12485374-12486179	805	-6.68	0.995947	0.669031	0.472311	24	0.423168	0.29078	25.6	-0.276149	2364.07	0.598758	1.04281	-235.8	1.76383	0	-33	0	-33	24.5	94562.6	10	0.115811	2.89735	0.550827	piRNA	dmel	9708709	dcr2-het_rep1
chr3R:12486293-12486812	519	-3.56211	0.906371	0.8	0.394217	24	0.522222	0.333333	24.5	-0.503953	0	0.554913	1.17724	-118.8	-33	0	-33	0	-33	26	155556	10	3.39405	1.64533	0.877778	piRNA	dmel	9708709	dcr2-het_rep1
chr3R:12486971-12488334	1363	-9.24129	0.992806	0.695238	0.464668	24	0.420952	0.302857	22	0.371391	5714.29	0.579604	1.02544	-370.9	-33	0	-33	0	-33	25.5	112381	10	0.631414	2.48243	0.620952	piRNA	dmel	9708709	dcr2-het_rep1
chr3R:12488493-12488851	358	-2.34084	0.997236	0.930769	0.444509	24	0.707692	0.623077	24.5	-0.333333	0	0.541899	2.7704	-88.6	-33	0	-33	0	-33	25.25	138462	10	2.35047	2.35047	0.461539	piRNA	dmel	9708709	dcr2-het_rep1
chr3R:12489014-12489652	638	-3.73756	0.975166	0.856209	0.466999	25	0.398693	0.254902	25	-0.596285	0	0.570533	1.31216	-160.9	-33	0	-33	0	-33	25.5	65359.5	10	2.66928	1.64533	0.660131	piRNA	dmel	9708709	dcr2-het_rep1
chr3R:12489811-12491662	1851	-7.03648	0.994176	0.660494	0.461887	24	0.460905	0.341564	24	-0.723101	0	0.564019	1.46671	-496.5	-33	0	-33	0	-33	25.5	144033	10	0.259674	1.8762	0.631687	piRNA	dmel	9708709	dcr2-het_rep1
chr3R:12491877-12492174	297	-0.635316	0.941155	0.961538	0.364919	24	0.884615	0.346154	24.5	-33	0	0.356902	1.35581	-40.7	-33	0.241758	-33	-10.7	-33	-33	-33	-33	0.292403	-33	0.807692	piRNA	dmel	9708709	dcr2-het_rep1
chr3R:12493412-12493508	96	-1.23627	0.806402	0.9375	0.372801	23	1	0.4375	24.5	-33	0	0.645833	0.624007	-14.1	-33	0.616822	-33	-16.8	-33	25.5	375000	NA	1.37499	-33	0.625	piRNA	dmel	9708709	dcr2-het_rep1
chr3R:12494295-12494535	240	-1.35109	0.944855	0.961538	0.422119	24	0.576923	0.153846	24.5	-33	0	0.583333	1.70389	-68.3	-33	0.584906	-33	-29.2	-33	-33	-33	-33	1.04375	-33	0.769231	piRNA	dmel	9708709	dcr2-het_rep1
chr3R:12494668-12494982	314	-1.45151	0.989115	0.961538	0.352701	24	0.923077	0.557692	24.5	-33	0	0.611465	1.34328	-62.9	-33	0	-33	0	-33	25	38461.5	NA	0.825898	1.64533	0.596154	piRNA	dmel	9708709	dcr2-het_rep1
chr3R:12495197-12496632	1435	-3.45169	0.997322	0.862637	0.426992	24	0.813187	0.296703	22	-0.333333	0	0.568641	2.23582	-359.8	-33	0	-33	0	-33	24.25	16483.5	19.5	2.77507	2.35047	0.615385	piRNA	dmel	9708709	dcr2-het_rep1
chr3R:12496791-12497218	427	-1.92189	0.989531	0.657718	0.431952	24	0.644295	0.308725	24.5	-33	0	0.557377	2.81482	-102.8	-33	0	-33	0	-33	25	221476	10	0.676836	1.64533	0.557047	piRNA	dmel	9708709	dcr2-het_rep1
chr3R:12497338-12498706	1368	-5.6665	0.996241	0.794964	0.470423	24	0.374101	0.320144	25.5	-0.957895	0	0.546784	1.60899	-342.6	-33	0	-33	0	-33	25	82733.8	10	0.602172	3.39405	0.697842	piRNA	dmel	9708709	dcr2-het_rep1
chr3R:12498865-12499292	427	-3.28262	0.98	0.680723	0.427265	24	0.638554	0.295181	23	-0.333333	0	0.519906	2.31389	-103	-33	0	-33	0	-33	26.5	204819	10	3.28664	2.35047	0.512048	piRNA	dmel	9708709	dcr2-het_rep1
chr3R:12499412-12500287	875	-6.05867	0.994913	0.885714	0.479988	24	0.346939	0.293878	25	1.5396	8163.27	0.56	1.81277	-218.7	-33	0	-33	0	-33	25.5	40816.3	9	1.64533	-33	0.685714	piRNA	dmel	9708709	dcr2-het_rep1
chr3R:12500446-12500873	427	-3.80131	0.989068	0.635294	0.415639	24	0.647059	0.370588	23.5	-0.503953	0	0.515223	3.07976	-109.4	-33	0	-33	0	-33	26.5	317647	10	0.0377503	2.35047	0.605882	piRNA	dmel	9708709	dcr2-het_rep1
chr3R:3440793-3443119	2326	-2.13609	0.958559	0.980952	0.383932	25	0.809524	0.342857	24.5	-33	0	0.597592	0.106163	-579.84	-33	0	-33	0	-33	-33	-33	-33	0.139418	3.04123	0.733333	piRNA	dmel	9708709	dcr2-het_rep1
chr3R:3447711-3449050	1339	-2.99027	0.977172	0.961905	0.393212	25	0.704762	0.276191	26	-33	0	0.595967	1.65416	-329	-0.333333	0	-33	0	-33	23.5	38095.2	15	0.763157	2.35047	0.8	piRNA	dmel	9708709	dcr2-het_rep1
chr3R:3452949-3453976	1027	-1.39247	0.977419	0.924051	0.408337	25	0.759494	0.455696	24.5	-33	0	0.601753	2.0938	-231	-33	0	-33	0	-33	25	37974.7	10	-0.286705	-33	0.734177	piRNA	dmel	9708709	dcr2-het_rep1
chr3R:3985778-3988551	2773	-2.98919	0.990803	0.969697	0.41023	24	0.868687	0.313131	27	2.66667	20202	0.670033	1.82734	-808.2	-33	0	-33	0	-33	-33	-33	-33	0.39796	1.64533	0.888889	piRNA	dmel	9708709	dcr2-het_rep1
chrX:21522100-21525464	3364	-13.005	0.991443	0.993961	0.38764	25	0.699275	0.271739	23	-0.333333	0	0.588585	2.25236	-808.8	1.68866	0	-33	0	-33	24	4830.92	10	-0.334843	0.31072	0.683575	piRNA	dmel	9708709	dcr2-het_rep1
chrX:21526428-21528621	2193	-6.66414	0.989491	0.904459	0.367033	25	0.77707	0.213376	25	-0.333333	0	0.619243	1.97677	-564.9	-33	0	-33	0	-33	25.5	50955.4	10	2.13896	1.64533	0.671975	piRNA	dmel	9708709	dcr2-het_rep1
chrX:21528797-21530178	1381	-2.80721	0.88672	0.652174	0.373389	25	0.478261	0.347826	24.5	-33	0	0.582187	1.97663	-351.3	-33	0	-33	0	-33	24.5	43478.3	NA	3.39405	-33	0.913044	piRNA	dmel	9708709	dcr2-het_rep1
chrX:21530324-21533259	2935	-8.28635	0.998383	0.921622	0.367246	25	0.697297	0.310811	23	-33	0	0.632368	2.05553	-845.2	-0.471405	0	-33	0	-33	27	27027	NA	3.39405	1.64533	0.745946	piRNA	dmel	9708709	dcr2-het_rep1
chrX:21533504-21534844	1340	-3.69184	0.983607	0.905405	0.397406	24	0.72973	0.283784	24.5	-33	0	0.622388	2.0049	-347.6	-33	0	-33	0	-33	26.3333	27027	10	-0.0805571	3.39405	0.837838	piRNA	dmel	9708709	dcr2-het_rep1
chrX:21546983-21554488	7505	-9.9841	0.991525	0.985748	0.344072	24	0.83848	0.32304	24.5	-33	0	0.618788	1.64533	-1880.3	-0.503953	0	-33	0	-33	-33	-33	-33	0.564565	0.544509	0.788599	piRNA	dmel	9708709	dcr2-het_rep1
chrX:21642156-21646929	4773	-11.5922	0.981293	0.988338	0.366852	25	0.830904	0.265306	24.5	-33	0	0.634821	1.09477	-1219.2	-0.683837	0	-33	0	-33	24.5	5830.9	4	0.898979	1.38911	0.962099	piRNA	dmel	9708709	dcr2-het_rep1
chrX:21650053-21651185	1132	-5.4169	0.984207	0.969072	0.359917	24	0.773196	0.391753	24.5	-0.333333	0	0.607774	1.64533	-286.3	-0.333333	0	-33	0	-33	26	20618.6	30	1.37488	2.05816	0.886598	piRNA	dmel	9708709	dcr2-het_rep1
chrX:21680457-21684949	4492	-7.89386	0.986145	0.991525	0.343846	25	0.733051	0.364407	24.5	-33	0	0.644257	2.43852	-1108.9	-0.333333	0	-33	0	-33	24.5	8474.58	NA	0.267676	2.48243	0.90678	piRNA	dmel	9708709	dcr2-het_rep1
chrX:21689225-21691177	1952	-2.6175	0.984748	0.990099	0.357365	24	0.762376	0.306931	24.5	-33	0	0.626025	0.756757	-481.9	2.16248	0	-33	0	-33	-33	-33	-33	1.24217	2.71163	0.980198	piRNA	dmel	9708709	dcr2-het_rep1
chrX:21694653-21695795	1142	-5.22466	0.889471	0.985714	0.33139	25	0.842857	0.228571	24.5	-33	0	0.591944	1.47228	-224.6	-0.503953	0	-33	0	-33	-33	-33	-33	1.39349	2.90856	0.885714	piRNA	dmel	9708709	dcr2-het_rep1
chrX:21709396-21711789	2393	-4.29566	0.990552	0.942446	0.3589	24	0.827338	0.316547	24.5	-33	0	0.641872	3.39405	-609.4	-0.503953	0	-33	0	-33	26	129496	10	1.64533	2.90856	0.877698	piRNA	dmel	9708709	dcr2-het_rep1
chrX:21714052-21717148	3096	-4.3783	0.99386	0.982301	0.464792	24	0.765487	0.20354	21	-33	0	0.661499	1.64533	-1038.1	-0.333333	0	-33	0	-33	-33	-33	-33	0.473387	3.00327	0.818584	piRNA	dmel	9708709	dcr2-het_rep1
chrX:21719356-21724734	5378	-10.1248	0.98864	0.985402	0.424978	24	0.819951	0.240876	24	0.170716	2433.09	0.638155	2.35047	-1554.6	2.5	0	-33	0	-33	24.5	34063.3	27.5	0.118873	0.924633	0.854015	piRNA	dmel	9708709	dcr2-het_rep1
chrX:21726436-21727237	801	-4.75705	0.988052	0.979381	0.447759	25	0.783505	0.298969	23	-33	0	0.651685	0.0586738	-261.1	-33	0	-33	0	-33	-33	-33	-33	0.296711	2.89735	0.886598	piRNA	dmel	9708709	dcr2-het_rep1
chrX:21731888-21733426	1538	-7.72943	0.958859	0.990654	0.410372	25	0.803738	0.205607	24.5	-33	0	0.644993	0.73272	-449.9	-0.333333	0	-33	0	-33	-33	-33	-33	0.238816	0.91362	0.82243	piRNA	dmel	9708709	dcr2-het_rep1
chrX:21739950-21740129	179	-0.744618	0.883756	0.952381	0.483554	24	0.476191	0.190476	24.5	-33	0	0.648045	1.95325	-59.7	-33	0.590909	-33	-25	-33	-33	-33	-33	1.99955	-33	0.904762	piRNA	dmel	9708709	dcr2-het_rep1
chrX:21746574-21748933	2359	-9.92158	0.989561	0.984326	0.420613	24	0.827586	0.169279	26	2.66667	3134.8	0.626537	1.41229	-615.4	0	0	-33	0	-33	25.5	18808.8	16	0.577364	0.562651	0.818182	piRNA	dmel	9708709	dcr2-het_rep1
chrX:21754302-21754605	303	-4.41342	0.975728	0.971429	0.446399	25	0.771429	0.228571	25	-33	0	0.673267	0.249998	-85.5	1.76383	0	-33	0	-33	25.5	57142.9	14	1.28074	1.34312	0.9	piRNA	dmel	9708709	dcr2-het_rep1
chrX:21759285-21760369	1084	-8.61646	0.990998	0.989071	0.461853	25	0.754098	0.125683	24	-33	0	0.660517	1.35136	-368.7	0.333333	0	-33	0	-33	-33	-33	-33	-0.293477	0.925187	0.84153	piRNA	dmel	9708709	dcr2-het_rep1
chrX:21762201-21762922	721	-3.16317	0.999411	0.987013	0.391391	25	0.766234	0.149351	24	-0.333333	0	0.615811	2.59799	-232.6	-33	0	-33	0	-33	-33	-33	-33	-0.214376	1.46561	0.753247	piRNA	dmel	9708709	dcr2-het_rep1
chrX:21773438-21773726	288	-2.3678	0.990917	0.973684	0.406384	25	0.75	0.421053	25	-0.503953	0	0.583333	0.860068	-65.3	-0.333333	0.519231	-33	-20.8	-33	24	26315.8	22	0.969654	2.90856	0.828947	piRNA	dmel	9708709	dcr2-het_rep1
chrX:21775136-21775528	392	-0.907751	0.980164	0.94	0.372849	25	0.84	0.34	24	-33	0	0.632653	2.35047	-89.4	-0.333333	0	-33	0	-33	-33	-33	-33	1.03746	2.35047	0.8	piRNA	dmel	9708709	dcr2-het_rep1
chrX:21775921-21776395	474	-2.93306	0.972884	0.941176	0.388616	24	0.705882	0.505882	25	-33	0	0.620253	2.22532	-109.6	-33	0	-33	0	-33	24.8	23529.4	19	0.558279	2.31015	0.729412	piRNA	dmel	9708709	dcr2-het_rep1
chrX:21776703-21777226	523	-0.80374	0.949802	0.818182	0.409136	24	0.666667	0.333333	27	-33	0	0.56979	1.64533	-126	-33	0	-33	0	-33	24.75	121212	15.5	0.28571	-33	0.939394	piRNA	dmel	9708709	dcr2-het_rep1
chrX:21786624-21787604	980	-2.59257	0.978107	0.990196	0.416322	24	0.833333	0.176471	24.5	-33	0	0.67551	0.636781	-281	-33	0	-33	0	-33	24	19607.8	NA	0.435344	1.69286	0.911765	piRNA	dmel	9708709	dcr2-het_rep1
chrX:21875341-21876179	838	-4.30836	0.989811	0.985294	0.40131	24	0.720588	0.176471	24.5	-33	0	0.682578	0.194012	-245.4	-0.333333	0	-33	0	-33	24	29411.8	10	0.0788551	2.73274	0.941176	piRNA	dmel	9708709	dcr2-het_rep1
chrX:21911645-21912293	648	-3.78425	0.891262	0.984615	0.457313	25	0.769231	0.123077	24.5	-0.333333	0	0.660494	1.51588	-206.9	0.942809	0	-33	0	-33	-33	-33	-33	0.122931	2.35047	0.815385	piRNA	dmel	9708709	dcr2-het_rep1
chrX:21945850-21946371	521	-1.67854	0.939402	0.963636	0.382513	24	0.872727	0.272727	24.5	-33	0	0.575816	0.560679	-128.6	-33	0	-33	0	-33	-33	-33	-33	0.751676	2.73274	0.909091	piRNA	dmel	9708709	dcr2-het_rep1
chrX:21962769-21963052	283	-1.82274	0.894764	0.818182	0.405528	24	0.454545	0.431818	22.25	-33	0	0.614841	1.76965	-72.9	-33	0.585859	-0.333333	-19.8	0.793016	23	45454.6	NA	2.47185	2.35047	0.818182	piRNA	dmel	9708709	dcr2-het_rep1
chrX:21963553-21967572	4019	-12.1306	0.999802	0.909126	0.503691	25	0.854143	0.0649103	24	1.72975	9163.8	0.631998	0.905209	-1027.9	0.471405	0	-33	0	-33	25.5	2218404	10	0.46856	1.79887	0.264223	piRNA	dmel	9708709	dcr2-het_rep1
chrX:21967679-21969515	1836	-1.76069	0.886174	0.952381	0.345302	24	0.761905	0.190476	24.5	-33	0	0.595861	1.89814	-390	-33	0	-33	0	-33	-33	-33	-33	1.64533	-33	0.857143	piRNA	dmel	9708709	dcr2-het_rep1
chrX:21969633-21973938	4305	-11.8123	0.999289	0.865561	0.462149	25	0.685355	0.124142	26	-0.392998	7437.07	0.63554	2.28796	-1121	-33	0	-33	0	-33	25	192220	10	0.0881088	2.90856	0.397597	piRNA	dmel	9708709	dcr2-het_rep1
chrX:21976501-21977636	1135	-2.81362	0.982839	0.840206	0.40485	23	0.582474	0.386598	19	-33	0	0.597357	1.60013	-287.3	-33	0	-33	0	-33	25	154639	10	2.1516	1.64533	0.71134	piRNA	dmel	9708709	dcr2-het_rep1
chrX:21977744-21978696	952	-6.77305	0.992651	0.654762	0.473814	24	0.480159	0.22619	24.25	-0.525509	0	0.644958	1.97276	-283	-0.438397	0	-33	0	-33	25	154762	10	1.24911	2.90856	0.888889	piRNA	dmel	9708709	dcr2-het_rep1
chrX:22121200-22121972	772	-5.90965	0.913911	0.977169	0.463828	25	0.808219	0.269406	24.5	-33	0	0.603627	2.43821	-237.4	-0.666667	0	-33	0	-33	26.5	173516	10	-0.707262	2.29556	0.520548	piRNA	dmel	9708709	dcr2-het_rep1
chrX:22137464-22137681	217	-6.66183	0.994453	0.977855	0.504512	23	0.868298	0.0454546	24	1.30095	34965	0.626728	2.64893	-58.8	-33	0.666667	-0.333333	-26.9	1.36238	23	417249	10	-0.384078	1.55236	0.280886	piRNA	dmel	9708709	dcr2-het_rep1
chrX:22137952-22138359	407	-5.74692	0.996961	0.990926	0.460882	24	0.84029	0.203267	25	-0.547997	0	0.624079	2.80918	-112.6	0.471405	0	-33	0	-33	-33	-33	-33	1.35615	2.13896	0.362976	piRNA	dmel	9708709	dcr2-het_rep1
chrX:22138469-22138509	40	-3.01022	0.995174	0.996845	0.561934	25	0.823344	0.0315457	24.5	-33	0	0.55	2.50405	-13.7	-33	0.685714	-33	-29.6	-33	26	44164	10	1.64533	-33	0.277602	piRNA	dmel	9708709	dcr2-het_rep1
chrX:22357559-22358736	1177	-10.569	0.994265	0.985472	0.521258	24	0.625908	0.244552	25.6667	-0.611775	0	0.587935	2.7704	-379.1	0.764719	0	-33	0	-33	26.5	96852.3	10	1.47495	1.46337	0.533898	piRNA	dmel	9708709	dcr2-het_rep1
chrX:22359017-22361103	2086	-10.7626	0.993631	0.891482	0.496584	24	0.570595	0.373396	24	0.348155	3500.58	0.619367	1.41018	-754.3	-0.547997	0	-33	0	-33	26	46674.4	10	1.88319	1.07211	0.591599	piRNA	dmel	9708709	dcr2-het_rep1
chrX:22361760-22366204	4444	-31.4512	0.999702	0.956595	0.448083	25	0.782187	0.200338	25	0.240534	3043.97	0.607561	3.01175	-1277.1	-0.503953	0	-33	0	-33	25.5	151296	10	0.737751	0.543877	0.363021	piRNA	dmel	9708709	dcr2-het_rep1
chrX:22366484-22367802	1318	-8.25133	0.994016	0.950928	0.479644	24	0.627321	0.385942	25	2.58098	14588.9	0.587253	1.21988	-443.1	-1.19737	0	-33	0	-33	25.5	17241.4	10	2.1516	1.04201	0.515915	piRNA	dmel	9708709	dcr2-het_rep1
chrX:22367957-22368737	780	-5.20234	0.98493	0.687943	0.571819	24	0.375887	0.22695	24.6154	2.35702	14184.4	0.628205	1.84892	-306.2	2.35702	0	-33	0	-33	25.5	42553.2	23	2.9647	-33	0.929078	piRNA	dmel	9708709	dcr2-het_rep1
chrX:22369333-22372816	3483	-32.9233	0.99968	0.940734	0.490986	25	0.604139	0.155315	26	0.307934	6228.77	0.598335	2.325	-997.7	1.25093	0	-33	0	-33	25.5	279587	10	0.705888	2.22532	0.282205	piRNA	dmel	9708709	dcr2-het_rep1
chrX:22372957-22375001	2044	-23.6598	0.990776	0.945317	0.485726	25	0.647224	0.280987	25	0.871294	28042.6	0.6409	2.12977	-633.4	-0.0732866	0	-33	0	-33	25.5	226024	10	0.831429	0.826927	0.5129	piRNA	dmel	9708709	dcr2-het_rep1
chrX:22375125-22375426	301	-6.41268	0.983353	0.981132	0.324402	26	0.783019	0.367924	24.5	-33	0	0.598007	0.449488	-46.6	-0.333333	0	-33	0	-33	27	75471.7	15.5	0.594282	2.61383	0.707547	piRNA	dmel	9708709	dcr2-het_rep1
chrX:22382350-22383601	1251	-13.4546	0.991369	0.917883	0.399309	25	0.520985	0.525547	26	-0.949961	912.409	0.594724	2.4383	-320.6	-0.764719	0	-33	0	-33	26.5	292883	10	1.39671	1.69468	0.516423	piRNA	dmel	9708709	dcr2-het_rep1
chrX:22385214-22385285	71	-0.990709	0.934712	0.828571	0.326061	25	0.857143	0.457143	26	2.66667	28571.4	0.394366	1.64533	NA	0.471405	0.438356	1.60806	0	0.246613	26.5	400000	10	2.05131	1.64533	0.828571	piRNA	dmel	9708709	dcr2-het_rep1
chrX:22385782-22385933	151	-1.5714	0.994207	0.846154	0.347519	24	0.653846	0.173077	28	-33	0	0.450331	3.11352	-16.6	-0.471405	0.425926	-33	-14	-33	25.5	105769	10	0.460732	2.77507	0.586538	piRNA	dmel	9708709	dcr2-het_rep1
chrX:22386296-22386322	26	-0.34227	0.923596	0.6875	0.308982	24	0.6875	0.5	24.5	-33	0	0.538462	1.41817	NA	-33	0.576271	-33	0	-33	24.5	750000	10	2.77716	-33	0.8125	piRNA	dmel	9708709	dcr2-het_rep1
chrX:22387768-22388052	284	-4.29105	0.985426	0.975	0.422165	24	0.685	0.335	24.6667	-0.503953	0	0.626761	2.35047	-72.4	-33	0.62963	-0.787721	-30.6	0.0595029	26	20000	22	0.652744	0.864625	0.68	piRNA	dmel	9708709	dcr2-het_rep1
chrX:22388178-22388814	636	-10.113	0.993978	0.715881	0.478243	24	0.53598	0.399504	25	-0.397966	2481.39	0.584906	2.10116	-165.7	-0.666667	0	-33	0	-33	25.5	457816	10	1.32651	2.90856	0.493797	piRNA	dmel	9708709	dcr2-het_rep1
chrX:22389171-22392307	3136	-29.0331	0.999642	0.806746	0.534408	25	0.19821	0.273977	26	1.331	53708.4	0.638393	2.26793	-1045.5	-0.3253	0	-33	0	-33	26.5	575767	10	1.0713	0.948228	0.472027	piRNA	dmel	9708709	dcr2-het_rep1
chrX:22393064-22393348	284	-3.91278	0.990382	0.986047	0.416652	24	0.632558	0.325581	25.5	-0.471405	0	0.626761	1.21158	-72.4	-0.333333	0.641509	0.334808	-30.6	-0.120949	26	27907	20.3333	0.110154	1.78501	0.613954	piRNA	dmel	9708709	dcr2-het_rep1
chrX:22393474-22394110	636	-9.21614	0.993707	0.764398	0.465122	24	0.582461	0.430628	27	-0.494872	2617.8	0.58805	2.07711	-167.2	2.66667	0	-33	0	-33	25.5	421466	10	1.11386	2.35047	0.507853	piRNA	dmel	9708709	dcr2-het_rep1
chrX:22394252-22397452	3200	-28.8762	0.999664	0.77482	0.526724	25	0.235445	0.291901	23	0.962469	41058.5	0.64375	2.07262	-1103	1.2	0	-33	0	-33	25.5	479711	10	0.458919	0.675883	0.471371	piRNA	dmel	9708709	dcr2-het_rep1
chrX:22397565-22398516	951	-16.7454	0.999637	0.83441	0.52419	25	0.263328	0.212439	26	0.754112	60177.7	0.662461	2.22594	-372.9	-0.666667	0	-33	0	-33	25	581179	10	0.705758	1.69286	0.461632	piRNA	dmel	9708709	dcr2-het_rep1
chrX:22399699-22399724	25	-0.509979	0.91141	0.588235	0.259902	23	0.764706	0.588235	25	-0.333333	0	0	2.77372	NA	-33	0	-33	0	-33	-33	-33	-33	1.64533	-33	0.764706	piRNA	dmel	9708709	dcr2-het_rep1
chrX:22400263-22401002	739	-0.0894011	0.809964	0.8	0.48637	23	0.6	0.4	24.5	-33	0	0.565629	1.64533	-196.9	-33	0	-33	0	-33	-33	-33	-33	-33	-33	1	piRNA	dmel	9708709	dcr2-het_rep1
chrX:22401107-22402183	1076	-0.865033	0.860577	0.9375	0.590491	21	0.3125	0.125	27	-33	0	0.563197	1.83251	-300.9	-33	0	-33	0	-33	-33	-33	-33	3.39405	-33	1	piRNA	dmel	9708709	dcr2-het_rep1
chrX:22402709-22402792	83	-4.05496	0.821597	0.7	0.492444	25	0.3	0.5	24.5	-33	0	0.698795	1.94354	-19.5	-33	0.74	-33	-37.6	-33	25.5	250000	10	2.90856	-33	0.85	piRNA	dmel	9708709	dcr2-het_rep1
chrX:22402906-22403311	405	-5.08433	0.994602	0.703252	0.541617	25	0.272358	0.418699	27	0.294484	8130.08	0.479012	0.779867	-102.2	-0.333333	0	-33	0	-33	24.5	317073	10	1.75463	3.04123	0.772358	piRNA	dmel	9708709	dcr2-het_rep1
chrX:22403479-22403882	403	-2.21038	0.964066	0.852941	0.523699	25	0.397059	0.411765	27	-0.333333	0	0.53598	2.29556	-107	-33	0	-33	0	-33	25.5	147059	10	1.10768	-33	0.838235	piRNA	dmel	9708709	dcr2-het_rep1
chrX:22407713-22407784	71	-0.738717	0.985467	0.783784	0.313798	25	0.783784	0.594595	22	2.66667	27027	0.394366	1.64533	NA	-0.471405	0.487805	-33	0	-33	25.5	567568	10	2.24492	-33	0.756757	piRNA	dmel	9708709	dcr2-het_rep1
chrX:22408281-22408432	151	-1.98786	0.965849	0.839081	0.343734	25	0.770115	0.149425	24	-0.503953	0	0.450331	1.45061	-16.6	-33	0.464647	-33	-14	-33	26	91954	13.5	0.624772	2.35806	0.574713	piRNA	dmel	9708709	dcr2-het_rep1
chrX:22408795-22408821	26	-0.470755	0.888028	0.8	0.29251	24	0.9	0.5	24.5	-33	0	0.538462	2.45553	NA	-33	0.62963	-33	0	-33	24.75	400000	12	2.35047	-33	1	piRNA	dmel	9708709	dcr2-het_rep1
chrX:22414245-22415581	1336	-13.4224	0.992582	0.916367	0.427166	24	0.659173	0.441547	21	-0.64715	899.281	0.592814	1.34062	-359	-33	0	-33	0	-33	25.5	819245	10	2.61383	1.0159	0.528777	piRNA	dmel	9708709	dcr2-het_rep1
chrX:22417132-22417454	322	-4.76706	0.990588	0.9875	0.353675	25	0.925	0.35	24	-33	0	0.608696	2.46249	-84.5	-0.666667	0	-33	0	-33	-33	-33	-33	1.05814	2.0803	0.55625	piRNA	dmel	9708709	dcr2-het_rep1
chrX:22418672-22418939	267	-2.43341	0.954806	0.990476	0.366703	24	0.847619	0.2	25	-0.333333	0	0.509363	0.16864	-41.3	-0.611775	0.490196	-33	-17.4	-33	25.5	57142.9	19	0.971895	1.24027	0.666667	piRNA	dmel	9708709	dcr2-het_rep1
chrX:22419079-22419550	471	-3.91867	0.988837	0.984127	0.320756	25	0.820106	0.291005	24.5	-33	0	0.590233	1.64533	-87.2	0.471405	0	-33	0	-33	25.5	84656.1	10	0.91676	1.06631	0.603175	piRNA	dmel	9708709	dcr2-het_rep1
chrX:22420950-22421914	964	-6.05639	0.996585	0.987552	0.460415	25	0.740664	0.188797	26	-33	0	0.66805	2.22532	-311.5	-0.924917	0	-33	0	-33	24	24896.3	12	0.979891	1.81195	0.46888	piRNA	dmel	9708709	dcr2-het_rep1
chrX:22422126-22422462	336	-4.39567	0.990271	0.987097	0.398559	25	0.890323	0.43871	26	0.251976	6451.61	0.571429	2.10389	-86.6	-0.333333	0	-33	0	-33	23	77419.4	24	0.934449	1.30314	0.56129	piRNA	dmel	9708709	dcr2-het_rep1
chrX:22424027-22425472	1445	-9.47031	0.993269	0.959631	0.486932	24	0.638985	0.341407	24	1.03709	8073.82	0.672664	1.76753	-527.2	-1.42841	0	-33	0	-33	25	96885.8	10	1.64533	1.06729	0.509804	piRNA	dmel	9708709	dcr2-het_rep1
chrY:2120560-2122519	1959	-3.04841	0.995372	0.93125	0.504102	24	0.775	0.15625	25	2.66667	6250	0.672792	3.00327	-716.1	-0.471405	0	-33	0	-33	25.5	25000	10	-0.0791309	1.64533	0.8375	piRNA	dmel	9708709	dcr2-het_rep1
Dsim_2R:1043428-1046457	3029	-13.762	0.903468	0.581667	0.426051	18	0.236667	0.3	19	0.578128	25000	0.613404	2.91752	-992.3	-33	0	-33	0	-33	24.5	96666.7	10	0.660644	3.39405	0.758333	piRNA	dsim	8530425	wxd1_rep1
Dsim_2R:1043582-1046457	2875	-12.6989	0.904227	0.5681	0.425982	18	0.249104	0.299283	19	0.578128	26881.7	0.613565	3.0021	-940.4	-33	0	-33	0	-33	24.5	103943	10	0.660644	3.39405	0.756272	piRNA	dsim	8530425	wxd1_rep1
Dsim_2R:1057392-1062624	5232	-9.73103	0.956147	0.618483	0.325861	25	0.374408	0.369668	25	0.214121	9478.67	0.589832	2.30046	-1475.87	1.63785	0	-33	0	-33	26	222749	10	-0.223434	0.571269	0.727488	piRNA	dsim	8530425	wxd1_rep1
Dsim_2R:1067130-1070148	3018	-9.21631	0.852071	0.646018	0.373864	18	0.358407	0.360619	21.25	-0.423334	0	0.644798	2.59257	-1029	-0.471405	0	-33	0	-33	21.5	741150	10	0.822681	2.35047	0.542035	piRNA	dsim	8530425	wxd1_rep1
Dsim_2R:1077054-1079461	2407	-9.30154	0.886361	0.560109	0.437717	18	0.193989	0.29235	19	-0.266076	2732.24	0.621521	1.80486	-808.8	-33	0	-33	0	-33	24.5	92896.2	10	0.921982	3.39405	0.73224	piRNA	dsim	8530425	wxd1_rep1
Dsim_2R:1099554-1101710	2156	-9.93224	0.866034	0.550649	0.446647	18	0.41039	0.301299	19	-0.365705	0	0.656772	3.0487	-755	1.48814	0	-33	0	-33	26	127273	10	1.61878	2.29556	0.71948	piRNA	dsim	8530425	wxd1_rep1
Dsim_2R:1195198-1197944	2746	-12.1943	0.959786	0.631313	0.496483	25	0.376263	0.179293	24	-0.471405	0	0.642389	2.04444	-995.6	-0.333333	0	-33	0	-33	25.5	247475	10	2.71163	1.64533	0.823232	piRNA	dsim	8530425	wxd1_rep1
Dsim_2R:1209106-1213601	4495	-13.4504	0.94733	0.528889	0.487106	25	0.254815	0.30963	19	0.105409	1481.48	0.626029	2.66894	-1614.7	1.01695	0	-33	0	-33	25.5	245926	10	1.88615	3.00327	0.791111	piRNA	dsim	8530425	wxd1_rep1
Dsim_2R:2789945-2804865	14920	-30.7012	0.947546	0.533273	0.345766	25	0.300365	0.43938	19	0.157058	5013.67	0	-33	0	-33	0	-33	0	-33	25.5	224932	10	1.21878	1.8729	0.709435	piRNA	dsim	8530425	wxd1_rep1
Dsim_2R:2790137-2795785	5648	-15.6485	0.969642	0.638479	0.40035	25	0.344453	0.458495	26	1.38778	6206.36	0.55347	2.77954	-1321.2	-0.644188	0	-33	0	-33	25.5	398759	10	1.90199	1.3344	0.71218	piRNA	dsim	8530425	wxd1_rep1
Dsim_2R:2796895-2802365	5470	-23.8486	0.967719	0.652542	0.304806	25	0.257627	0.453814	25	-0.307488	4237.29	0.597075	3.13264	-1276.5	-0.333333	0	-33	0	-33	25.5	200424	10	0.937985	1.8729	0.719915	piRNA	dsim	8530425	wxd1_rep1
Dsim_2R:2826911-2831245	4334	-28.8688	0.982064	0.797774	0.317336	26	0.179221	0.410761	22	0.050876	15955.5	0.554222	2.09479	-992.37	-0.656886	0	-33	0	-33	23.5	95361.8	28	0.309855	1.90505	0.763636	piRNA	dsim	8530425	wxd1_rep1
Dsim_2R:2875640-2881003	5363	-15.6748	0.923741	0.554717	0.372489	24	0.290566	0.374843	19	-0.726049	0	0.6157	3.06351	-1427.2	0.383902	0	-33	0	-33	25.5	91823.9	10	1.46887	2.77507	0.797484	piRNA	dsim	8530425	wxd1_rep1
Dsim_2R:2960151-2970279	10128	-27.538	0.932282	0.594972	0.324354	25	0.285847	0.424891	19	0.0918823	5896.96	0	-33	0	-33	0	-33	0	-33	25.5	146803	10	0.803154	1.8729	0.716636	piRNA	dsim	8530425	wxd1_rep1
Dsim_2R:2962361-2967831	5470	-23.8486	0.967719	0.652542	0.304806	25	0.257627	0.453814	25	-0.307488	4237.29	0.597075	3.13264	-1276.5	-0.333333	0	-33	0	-33	25.5	200424	10	0.937985	1.8729	0.719915	piRNA	dsim	8530425	wxd1_rep1
Dsim_2R:2972504-2974998	2494	-13.0297	0.92299	0.716738	0.422149	26	0.227468	0.362661	23	0.3849	2145.92	0.622294	2.85222	-833	-0.333333	0	-33	0	-33	24.5	81545.1	10	0.48726	3.00327	0.819743	piRNA	dsim	8530425	wxd1_rep1
Dsim_2R:3036524-3039288	2764	-7.66341	0.905988	0.623256	0.480363	18	0.353488	0.260465	20	-0.453267	0	0.646889	2.92021	-956.8	-33	0	-33	0	-33	22.5	93023.3	10	-0.156949	-33	0.860465	piRNA	dsim	8530425	wxd1_rep1
Dsim_2R:3040180-3042473	2293	-11.4662	0.92867	0.62069	0.425942	18	0.267241	0.353448	21	-0.438397	0	0.597471	3.10453	-720.8	-0.333333	0	-33	0	-33	24.5	131466	4	1.61933	3.39405	0.75431	piRNA	dsim	8530425	wxd1_rep1
Dsim_2R:3053502-3055911	2409	-11.4805	0.966334	0.675084	0.533429	24	0.511784	0.304714	24	-0.471405	0	0.652553	2.20216	-881.6	-0.333333	0	-33	0	-33	24.5	314815	10	0.985981	2.35203	0.648148	piRNA	dsim	8530425	wxd1_rep1
Dsim_2R:3065577-3068485	2908	-13.5552	0.977586	0.649901	0.410399	25	0.368836	0.307692	26	2.1419	6903.35	0.662311	2.6366	-905.8	0.765221	0	-33	0	-33	25.5	454635	10	0.174035	2.35203	0.663708	piRNA	dsim	8530425	wxd1_rep1
Dsim_2R:3065577-3070079	4502	-15.1987	0.974275	0.642342	0.405404	25	0.365766	0.3	26	1.81819	6306.31	0.661484	2.74155	-1371.9	0.843274	0	-33	0	-33	25.5	415315	10	0.182743	2.35203	0.681982	piRNA	dsim	8530425	wxd1_rep1
Dsim_2R:3085391-3094970	9579	-24.4799	0.82466	0.809582	0.463224	18	0.115786	0.381142	19	2.42886	11056.5	0.609876	2.80457	-3171.5	1.89303	0	-33	0	-33	24.5	103501	10	0.867757	2.0049	0.39957	piRNA	dsim	8530425	wxd1_rep1
Dsim_2R:3087219-3090228	3009	-16.5632	0.952905	0.604167	0.532255	23	0.189394	0.330492	19	2.56667	33143.9	0.63875	2.78906	-1187.7	2.31078	0	-33	0	-33	24.5	292614	10	1.17724	2.48243	0.726326	piRNA	dsim	8530425	wxd1_rep1
Dsim_2R:3087219-3091121	3902	-20.2299	0.959869	0.660417	0.521854	24	0.181944	0.315278	19	2.52887	25000	0.634546	2.80657	-1505.6	1.38702	0	-33	0	-33	24.5	234028	10	0.893092	2.0049	0.718056	piRNA	dsim	8530425	wxd1_rep1
Dsim_2R:3122156-3126074	3918	-12.7656	0.857331	0.534591	0.331798	18	0.203354	0.348008	26	-0.323726	6289.31	0.644206	2.23494	-1097.2	-33	0	-33	0	-33	25.5	104822	10	0.951014	-33	0.601677	piRNA	dsim	8530425	wxd1_rep1
Dsim_2R:3169404-3173768	4364	-14.9475	0.977906	0.632302	0.413157	25	0.341065	0.471649	26	-0.13943	6013.75	0.514665	2.79722	-978.4	-1	0	-33	0	-33	25.5	434708	10	1.79411	1.00807	0.687285	piRNA	dsim	8530425	wxd1_rep1
Dsim_2R:3170788-3173768	2980	-13.6463	0.981461	0.647225	0.418179	25	0.356538	0.466604	26	-0.116034	6585.14	0.522148	2.57765	-666	0.942809	0	-33	0	-33	25.5	476011	10	1.79411	1.00807	0.674506	piRNA	dsim	8530425	wxd1_rep1
Dsim_2R:3217904-3220769	2865	-7.90563	0.947073	0.53352	0.498128	23	0.22905	0.298883	24	-33	0	0.630367	2.97919	-1009.5	-0.333333	0	-33	0	-33	24.5	156425	10	2.35806	-33	0.796089	piRNA	dsim	8530425	wxd1_rep1
Dsim_2R:3230946-3236043	5097	-10.1275	0.942088	0.646409	0.328141	18	0.38674	0.406077	25	-0.114755	5524.86	0.585442	2.02312	-1450.46	2.14121	0	-33	0	-33	26	245856	10	1.64533	1.03723	0.732044	piRNA	dsim	8530425	wxd1_rep1
Dsim_2R:3254017-3257224	3207	-14.1447	0.966657	0.702211	0.535145	24	0.170351	0.250975	20	-0.525509	0	0.639227	1.46922	-1167.5	-0.333333	0	-33	0	-33	24.5	230169	10	1.20392	3.00327	0.685306	piRNA	dsim	8530425	wxd1_rep1
Dsim_2R:3254901-3257224	2323	-13.3218	0.968897	0.709251	0.534196	24	0.17768	0.262849	20	-0.525509	0	0.635385	1.3017	-847.4	-0.333333	0	-33	0	-33	24.5	254038	10	1.2528	3.39405	0.674009	piRNA	dsim	8530425	wxd1_rep1
Dsim_2R:3296719-3300316	3597	-12.7787	0.787368	0.788779	0.272924	19	0.219472	0.188119	21	0.408248	4950.49	0.588268	2.31062	-841.2	-0.333333	0	-33	0	-33	27.5	118812	10	2.48243	1.64533	0.331683	piRNA	dsim	8530425	wxd1_rep1
Dsim_2R:3342305-3344476	2171	-13.2711	0.966691	0.550562	0.468764	21	0.200375	0.364232	24	0.16538	14044.9	0.58959	2.75444	-596.6	-0.333333	0	-33	0	-33	24.5	764981	10	0.190489	2.90856	0.681648	piRNA	dsim	8530425	wxd1_rep1
Dsim_2R:3352958-3358292	5334	-15.7012	0.709606	0.911881	0.232164	18	0.354167	0.564471	24	1.88006	1126.13	0.659918	2.39708	-1774.5	-0.497468	0	-33	0	-33	24.5	55743.2	10	1.2502	1.64533	0.151746	piRNA	dsim	8530425	wxd1_rep1
Dsim_2R:3355214-3358069	2855	-13.1287	0.925938	0.602817	0.48036	24	0.447887	0.187324	24	1.88006	5633.8	0.673905	2.66729	-1071.2	-1.00791	0	-33	0	-33	24.5	278873	10	1.28429	1.64533	0.64507	piRNA	dsim	8530425	wxd1_rep1
Dsim_2R:3365810-3368937	3127	-12.5599	0.978675	0.638528	0.410999	25	0.367965	0.288961	26	1.70403	7575.76	0.658778	2.66312	-964	2.12121	0	-33	0	-33	25.5	400433	10	0.169661	2.71163	0.693723	piRNA	dsim	8530425	wxd1_rep1
Dsim_2R:3476859-3479796	2937	-10.1808	0.955319	0.538462	0.512662	23	0.249417	0.351981	26	-0.333333	0	0.653728	2.77519	-1130.1	2.35702	0	-33	0	-33	25.5	181818	10	2.77507	3.00327	0.81352	piRNA	dsim	8530425	wxd1_rep1
Dsim_2R:3476859-3480809	3950	-14.5307	0.955108	0.540098	0.508531	25	0.245499	0.363339	25	-0.333333	0	0.648608	2.88053	-1539.2	2.1176	0	-33	0	-33	25.5	171849	10	2.58432	3.00327	0.841244	piRNA	dsim	8530425	wxd1_rep1
Dsim_2R:3548253-3554505	6252	-40.8536	0.954629	0.79229	0.320054	21	0.605116	0.289137	22	0.281743	37831	0.62572	3.04197	-1578.2	1.12911	0	-33	0	-33	22	78004	17	0.637668	1.64533	0.765448	piRNA	dsim	8530425	wxd1_rep1
Dsim_2R:3569865-3572820	2955	-11.0845	0.923781	0.819643	0.492177	25	0.426786	0.230357	27	0.707107	3571.43	0.617259	3.10439	-1172.7	-33	0	-33	0	-33	24.5	260714	10	2.71163	1.65531	0.651786	piRNA	dsim	8530425	wxd1_rep1
Dsim_2R:3572824-3576174	3350	-19.8797	0.970869	0.683608	0.531223	24	0.478883	0.302792	26	0	2147.46	0.660299	2.514	-1326.3	0.611775	0	-33	0	-33	24.5	364352	10	0.580704	0.72431	0.711525	piRNA	dsim	8530425	wxd1_rep1
Dsim_2R:3572824-3577163	4339	-22.147	0.96662	0.682578	0.524337	24	0.499403	0.274463	26	0.411476	2983.29	0.666974	2.76779	-1735.2	0.239474	0	-33	0	-33	24.5	417064	10	0.848095	2.35047	0.699881	piRNA	dsim	8530425	wxd1_rep1
Dsim_2R:3577193-3581308	4115	-15.6198	0.93956	0.575096	0.502703	25	0.359435	0.204108	25	-0.471405	0	0.662454	2.36962	-1556	0.589832	0	-33	0	-33	24.5	186136	10	0.579135	1.64533	0.775353	piRNA	dsim	8530425	wxd1_rep1
Dsim_2R:3767476-3770410	2934	-11.6276	0.824721	0.536485	0.350809	18	0.336074	0.459404	19	-0.321577	4111	0.65576	2.7166	-965	0.3849	0	-33	0	-33	23.5	260021	18	1.8783	2.90856	0.426516	piRNA	dsim	8530425	wxd1_rep1
Dsim_2R:3767800-3769988	2188	-10.059	0.8956	0.7	0.377709	18	0.438889	0.295833	19	0.0575912	5555.56	0.659963	2.71567	-768.7	-0.497468	0	-33	0	-33	23.5	351389	10	1.87724	2.90856	0.538889	piRNA	dsim	8530425	wxd1_rep1
Dsim_2R:4002050-4004965	2915	-13.0049	0.866675	0.531014	0.447361	18	0.161876	0.234493	22	-0.596285	0	0.64837	3.21936	-1062.6	-33	0	-33	0	-33	23.5	60514.4	10	1.97775	2.35047	0.588502	piRNA	dsim	8530425	wxd1_rep1
Dsim_2R:4004723-4008932	4209	-18.9776	0.829062	0.801975	0.456027	18	0.134995	0.203669	21	0.743161	2822.2	0.619149	2.78143	-1552.6	-0.333333	0	-33	0	-33	24.5	167451	10	0.771517	2.35047	0.433678	piRNA	dsim	8530425	wxd1_rep1
Dsim_2R:4006497-4008932	2435	-15.9479	0.94923	0.711068	0.513702	24	0.185113	0.307542	21	0.83205	5876.59	0.634086	2.65942	-893.2	-0.333333	0	-33	0	-33	24.5	330069	10	1.03337	2.35047	0.643487	piRNA	dsim	8530425	wxd1_rep1
Dsim_2R:455333-459873	4540	-13.2236	0.884845	0.61347	0.388666	18	0.385066	0.235725	21	0.0875376	4392.39	0.662115	3.02572	-1406.5	-0.658553	0	-33	0	-33	24.5	67349.9	10	1.59648	2.35047	0.754026	piRNA	dsim	8530425	wxd1_rep1
Dsim_2R:457556-459873	2317	-9.47697	0.867316	0.685	0.400065	18	0.425	0.2175	26	-0.503953	0	0.655157	2.96304	-705.2	-0.661623	0	-33	0	-33	24.5	95000	10	1.25487	2.35203	0.695	piRNA	dsim	8530425	wxd1_rep1
Dsim_2R:461356-465192	3836	-14.5989	0.925779	0.581936	0.35838	19	0.473548	0.416774	20	-0.0687614	2580.64	0.610532	3.03731	-1111.3	1.27491	0	-33	0	-33	24.5	103226	10	0.530309	2.35047	0.753548	piRNA	dsim	8530425	wxd1_rep1
Dsim_2R:480635-483221	2586	-12.2368	0.931217	0.649383	0.491111	25	0.407407	0.234568	20	-0.471405	0	0.67208	2.64087	-959.5	-0.333333	0	-33	0	-33	25	177778	10	1.64533	1.01229	0.787654	piRNA	dsim	8530425	wxd1_rep1
Dsim_2R:491802-496114	4312	-9.52527	0.961948	0.673469	0.310421	20	0.326531	0.346939	25	-0.492557	5102.04	0.665584	3.00301	-1344.3	-0.933333	0	-33	0	-33	26	211735	26	1.02062	2.9647	0.75	piRNA	dsim	8530425	wxd1_rep1
Dsim_2R:491802-496394	4592	-9.61451	0.96139	0.670051	0.310572	20	0.324873	0.347716	25	-0.492557	5076.14	0.662456	3.00912	-1451.2	-0.933333	0	-33	0	-33	26	210660	26	1.02062	2.9647	0.751269	piRNA	dsim	8530425	wxd1_rep1
Dsim_2R:573542-579234	5692	-16.5563	0.954957	0.535071	0.483463	18	0.255742	0.256362	22	1.85042	14276.9	0.614898	2.53552	-1886.7	2.2805	0	-33	0	-33	24.5	346989	10	1.02082	2.27575	0.662942	piRNA	dsim	8530425	wxd1_rep1
Dsim_2R:573542-579994	6452	-18.0368	0.962828	0.552391	0.484766	18	0.270285	0.246642	22	1.79112	12359	0.611903	2.5331	-2164.4	2.58333	0	-33	0	-33	24.5	311660	10	1.00751	0.332127	0.671682	piRNA	dsim	8530425	wxd1_rep1
Dsim_2R:593042-598880	5838	-31.4769	0.981027	0.797143	0.30592	26	0.181905	0.412381	22	-0.0499853	12698.4	0.572114	1.99385	-1406.27	-0.438397	0	-33	0	-33	23.5	77460.3	28	0.622092	2.30309	0.763175	piRNA	dsim	8530425	wxd1_rep1
Dsim_2R:645349-648040	2691	-15.2029	0.945538	0.857741	0.504507	25	0.500697	0.214784	19	1.01695	2789.4	0.612412	2.88329	-872.9	1.7079	0	-33	0	-33	24.5	157601	10	2.00471	0.978726	0.788006	piRNA	dsim	8530425	wxd1_rep1
Dsim_2R:649095-652946	3851	-15.36	0.941083	0.580786	0.489859	25	0.403202	0.229985	19	-0.611775	0	0.656972	3.08613	-1429.9	-33	0	-33	0	-33	25	177584	10	0.811097	1.64533	0.820961	piRNA	dsim	8530425	wxd1_rep1
Dsim_2R:654373-660470	6097	-17.0573	0.948925	0.566667	0.488168	25	0.389583	0.241667	19	-0.71166	0	0.664589	3.08172	-2223.1	-0.333333	0	-33	0	-33	25.5	167708	10	0.840859	1.64533	0.814583	piRNA	dsim	8530425	wxd1_rep1
Dsim_2R:670168-673460	3292	-19.8792	0.942842	0.860978	0.505936	25	0.132311	0.308725	27	1.61881	3835.09	0.59842	2.92021	-1167.5	-33	0	-33	0	-33	24.5	95877.3	10	2.10193	2.71163	0.786194	piRNA	dsim	8530425	wxd1_rep1
Dsim_2R:689569-693952	4383	-27.4496	0.95456	0.75979	0.305833	18	0.141653	0.434139	21	-0.501029	13303.4	0.612366	1.65015	-1027.1	-0.821058	0	-33	0	-33	26	1948098	10	0.638873	2.48243	0.371932	piRNA	dsim	8530425	wxd1_rep1
Dsim_2R:693609-695981	2372	-9.5915	0.969282	0.569748	0.485461	23	0.458823	0.194958	22	-0.266667	1680.67	0.688027	2.74694	-871	-1.00791	0	-33	0	-33	23.5	413445	10	2.42527	1.17794	0.74958	piRNA	dsim	8530425	wxd1_rep1
Dsim_2R:693609-697351	3742	-15.4187	0.981084	0.555997	0.476796	25	0.418586	0.200953	25	0.397706	4765.69	0.673971	2.62799	-1368.8	-1.29636	0	-33	0	-33	25.5	1030977	10	1.55096	0.509868	0.663225	piRNA	dsim	8530425	wxd1_rep1
Dsim_2R:712192-714790	2598	-17.7302	0.971513	0.71017	0.532694	24	0.508475	0.327119	26	0.544869	3389.83	0.657429	2.6435	-990.9	-0.633588	0	-33	0	-33	24.5	357627	10	0.457204	1.05164	0.688136	piRNA	dsim	8530425	wxd1_rep1
Dsim_2R:712192-715665	3473	-19.2658	0.969854	0.701503	0.532678	24	0.471311	0.289618	26	1.37182	5464.48	0.672617	2.74414	-1351.5	0.186704	0	-33	0	-33	24.5	338798	10	1.14409	0.887748	0.702186	piRNA	dsim	8530425	wxd1_rep1
Dsim_2R:716593-719191	2598	-17.6223	0.971355	0.709402	0.53245	24	0.507692	0.326496	26	-0.1283	1709.4	0.655889	2.64708	-989.3	-0.557773	0	-33	0	-33	24.5	357265	10	0.457204	1.05164	0.68547	piRNA	dsim	8530425	wxd1_rep1
Dsim_2R:716593-724848	8255	-23.7919	0.965189	0.673426	0.487178	24	0.448239	0.274813	19	2.13833	12273.2	0.667232	2.98953	-2789.3	-0.260063	0	-33	0	-33	24.5	263607	10	1.20136	0.637233	0.717182	piRNA	dsim	8530425	wxd1_rep1
Dsim_2R:719180-724834	5654	-15.4625	0.911394	0.615057	0.412335	18	0.348011	0.190341	19	2.27681	29829.5	0.665723	3.1267	-1774.1	-0.629941	0	-33	0	-33	24	120739	10	2.22619	2.29556	0.769886	piRNA	dsim	8530425	wxd1_rep1
Dsim_2R:725776-728374	2598	-17.5901	0.971452	0.710751	0.532868	24	0.510239	0.326792	26	-0.206441	1706.48	0.657429	2.62385	-986.9	-0.544869	0	-33	0	-33	24.5	360068	10	0.465327	1.05164	0.686007	piRNA	dsim	8530425	wxd1_rep1
Dsim_2R:725776-729277	3501	-19.2112	0.969763	0.701165	0.532892	24	0.472927	0.289239	26	0.587945	4112.41	0.666095	2.72877	-1355.9	-1.06019	0	-33	0	-33	24.5	339959	10	1.13616	0.902674	0.701165	piRNA	dsim	8530425	wxd1_rep1
Dsim_2R:730205-732803	2598	-17.8146	0.972034	0.71028	0.532992	24	0.508071	0.327103	26	0.313551	3398.47	0.655119	2.63425	-986.9	-0.247861	0	-33	0	-33	24.5	361937	10	0.457204	1.20816	0.686491	piRNA	dsim	8530425	wxd1_rep1
Dsim_2R:730205-733707	3502	-19.3911	0.970309	0.699454	0.533063	24	0.470628	0.288934	26	1.00074	5464.48	0.666476	2.73518	-1357.9	-1.3901	0	-33	0	-33	24.5	341530	10	0.775615	1.06069	0.701503	piRNA	dsim	8530425	wxd1_rep1
Dsim_2R:734635-737233	2598	-17.7644	0.971611	0.710059	0.532595	24	0.508876	0.32798	26	0.264906	3381.23	0.660508	2.63808	-986.5	0.167295	0	-33	0	-33	24.5	360101	10	0.46204	1.05164	0.688081	piRNA	dsim	8530425	wxd1_rep1
Dsim_2R:734635-738137	3502	-19.373	0.969912	0.699728	0.532702	24	0.472147	0.290081	26	0.986667	5434.78	0.671616	2.73979	-1359.4	-0.828199	0	-33	0	-33	24.5	339674	10	1.14673	0.912871	0.703125	piRNA	dsim	8530425	wxd1_rep1
Dsim_2R:739066-742405	3339	-18.5344	0.971675	0.693863	0.530243	24	0.487365	0.284477	26	1.44016	5776.17	0.666667	2.75113	-1293.87	0	0	-33	0	-33	24.5	350902	10	1.0957	0.784996	0.695307	piRNA	dsim	8530425	wxd1_rep1
Dsim_2R:739401-741501	2100	-15.7726	0.973639	0.677755	0.530737	24	0.508316	0.317048	26	0.608839	4158	0.653333	2.65283	-806	-0.744587	0	-33	0	-33	24.5	378378	10	0.478301	0.698324	0.681913	piRNA	dsim	8530425	wxd1_rep1
Dsim_2R:743333-745931	2598	-17.7603	0.97158	0.709568	0.532647	24	0.509737	0.328535	26	0.264906	3386.96	0.656659	2.63808	-981.1	-0.862567	0	-33	0	-33	24.5	360711	10	0.46204	1.05164	0.687553	piRNA	dsim	8530425	wxd1_rep1
Dsim_2R:743333-746835	3502	-19.4293	0.963619	0.705411	0.533208	24	0.463594	0.304609	26	0.986667	5344.02	0.667047	2.73935	-1352	0.3114	0	-33	0	-33	24.5	334001	10	1.14673	0.912871	0.689379	piRNA	dsim	8530425	wxd1_rep1
Dsim_2R:747763-750361	2598	-17.6438	0.972983	0.707731	0.532224	24	0.51062	0.328802	26	0.288225	3398.47	0.660508	2.63943	-986.4	0.0416667	0	-33	0	-33	24.5	361937	10	0.489519	1.05164	0.68904	piRNA	dsim	8530425	wxd1_rep1
Dsim_2R:747763-752122	4359	-21.2969	0.9627	0.686101	0.529434	24	0.486455	0.27444	26	0.57369	4711.43	0.672172	2.77069	-1708.6	-1.0328	0	-33	0	-33	24.5	302709	10	1.29928	2.35047	0.688457	piRNA	dsim	8530425	wxd1_rep1
Dsim_2R:755368-761884	6516	-20.8901	0.904835	0.629185	0.429517	25	0.265319	0.425142	19	-0.312348	1263.42	0.581031	2.9427	-1807.1	-0.800327	0	-33	0	-33	25.5	378396	10	0.917417	2.35047	0.579912	piRNA	dsim	8530425	wxd1_rep1
Dsim_2R:755815-760471	4656	-15.1893	0.884922	0.645991	0.377196	25	0.204236	0.402421	27	-0.71166	0	0.595361	2.9395	-1223.9	-0.471405	0	-33	0	-33	25.5	741301	10	0.724395	2.90856	0.698941	piRNA	dsim	8530425	wxd1_rep1
Dsim_2R:762819-769520	6701	-19.2755	0.944621	0.522367	0.461329	25	0.280056	0.213886	22	-0.132435	6057.78	0.604089	2.39673	-2173.6	-0.6154	0	-33	0	-33	25.5	260951	10	0.225194	0.972148	0.647717	piRNA	dsim	8530425	wxd1_rep1
Dsim_2R:765415-767793	2378	-12.3681	0.955655	0.506162	0.49243	18	0.229753	0.215669	22	1.57855	7922.53	0.617325	2.35549	-766.4	-1.01695	0	-33	0	-33	24.5	314261	10	0.406241	2.35203	0.648768	piRNA	dsim	8530425	wxd1_rep1
Dsim_2R:777474-781881	4407	-11.7483	0.947311	0.66325	0.486005	25	0.314788	0.210835	24.5	0.827894	14641.3	0.602224	2.88655	-1503.5	-0.800327	0	-33	0	-33	25.5	291362	10	0.496766	1.3901	0.698389	piRNA	dsim	8530425	wxd1_rep1
Dsim_2R:789904-791995	2091	-8.07732	0.914088	0.536585	0.375245	26	0.397213	0.271777	22	-0.349782	3484.32	0.593974	2.6179	-537.1	-0.666667	0	-33	0	-33	26.5	397212	10	2.23249	1.64533	0.808362	piRNA	dsim	8530425	wxd1_rep1
Dsim_2R:827136-829559	2423	-9.68927	0.872337	0.514212	0.466124	18	0.294574	0.235142	24	-0.373262	0	0.638877	2.88623	-792.8	0.611775	0	-33	0	-33	25.5	139535	10	1.64533	1.93363	0.669251	piRNA	dsim	8530425	wxd1_rep1
Dsim_2R:846586-848625	2039	-8.71592	0.891162	0.638095	0.344489	18	0.404762	0.457143	26	1.80952	14285.7	0.485532	3.02182	-440.38	-33	0	-33	0	-33	24.5	195238	10	2.35047	1.23854	0.857143	piRNA	dsim	8530425	wxd1_rep1
Dsim_2R:860942-866848	5906	-12.6113	0.909713	0.63252	0.409789	18	0.339837	0.263415	20	0.1849	3252.03	0.657298	2.96778	-1904	-0.503953	0	-33	0	-33	25.5	40650.4	10	1.88814	1.64533	0.752845	piRNA	dsim	8530425	wxd1_rep1
Dsim_2R:861868-866730	4862	-10.1684	0.92213	0.739535	0.442378	18	0.274419	0.265116	22.5	-0.65157	0	0.654463	2.63858	-1659.4	-33	0	-33	0	-33	25.5	58139.5	15	2.13896	-33	0.751163	piRNA	dsim	8530425	wxd1_rep1
Dsim_2R:892825-895106	2281	-10.4323	0.907757	0.569767	0.416351	24	0.392442	0.296512	19	-0.611775	0	0.643577	2.32509	-762.9	-33	0	-33	0	-33	24.5	156977	10	1.69457	2.48243	0.781977	piRNA	dsim	8530425	wxd1_rep1
Dsim_2R:997776-1002057	4281	-20.9068	0.964688	0.677056	0.524738	24	0.47878	0.313661	19	0.869993	3978.78	0.630227	2.6366	-1553	-0.977399	0	-33	0	-33	24.5	318966	10	1.18388	0.803607	0.710875	piRNA	dsim	8530425	wxd1_rep1
Dsim_3L:23592950-23596311	3361	-13.892	0.931405	0.67177	0.404469	18	0.422967	0.2689	26	0.245071	6698.56	0.646831	2.81569	-1135.5	1.33333	0	-33	0	-33	23.5	250718	10	1.67784	3.39405	0.626794	piRNA	dsim	8530425	wxd1_rep1
Dsim_3L:23617555-23622810	5255	-18.8294	0.831249	0.566065	0.423533	18	0.160289	0.213718	22	-0.393178	722.022	0.6196	2.90761	-1857.1	-33	0	-33	0	-33	24.5	64259.9	10	0.722028	3.39405	0.558123	piRNA	dsim	8530425	wxd1_rep1
Dsim_3L:23618719-23622810	4091	-17.79	0.817117	0.595984	0.413947	18	0.155823	0.208032	22	-0.333333	803.213	0.619897	2.90069	-1385.6	-33	0	-33	0	-33	24.5	65863.4	10	0.749521	3.39405	0.526104	piRNA	dsim	8530425	wxd1_rep1
Dsim_3L:23635878-23638388	2510	-14.1088	0.967548	0.800329	0.353333	25	0.483977	0.501232	22	0.156863	3286.77	0.565737	2.01415	-528.1	-1.00791	0	-33	0	-33	25	593262	10	1.13228	1.12514	0.605587	piRNA	dsim	8530425	wxd1_rep1
Dsim_3L:23635878-23639425	3547	-14.7314	0.964513	0.789266	0.356801	25	0.478295	0.490923	22	0.35383	3946.33	0.57457	2.08381	-831.5	0	0	-33	0	-33	25	569850	10	1.13228	1.12514	0.617995	piRNA	dsim	8530425	wxd1_rep1
Dsim_3L:23655341-23658827	3486	-14.9811	0.799447	0.623134	0.416356	18	0.708955	0.140858	25	-0.894427	0	0.655766	3.00252	-1174.6	-0.471405	0	-33	0	-33	26	90485.1	10	1.18911	1.85093	0.482276	piRNA	dsim	8530425	wxd1_rep1
Dsim_3L:23655915-23658827	2912	-13.2356	0.781428	0.66459	0.417002	18	0.722741	0.102804	25	-0.800327	0	0.649038	3.02627	-982.7	0.467764	0	-33	0	-33	26	88265.8	10	1.29099	1.90199	0.443406	piRNA	dsim	8530425	wxd1_rep1
Dsim_3L:23719291-23722112	2821	-15.1188	0.947926	0.773128	0.53029	24	0.566079	0.269824	24	-0.224606	4405.29	0.64587	2.44464	-1042.5	1.0303	0	-33	0	-33	24.5	273128	10	2.29556	1.09203	0.634361	piRNA	dsim	8530425	wxd1_rep1
Dsim_3L:23761502-23764979	3477	-9.56079	0.80861	0.689583	0.461151	18	0.575	0.527083	24.7143	-0.333333	0	0.628128	2.62067	-1217.9	-33	0	-33	0	-33	22.5	87500	10	2.77507	1.64533	0.49375	piRNA	dsim	8530425	wxd1_rep1
Dsim_3L:23761502-23765193	3691	-10.0931	0.813789	0.692308	0.46383	18	0.560729	0.52834	24.75	-0.333333	0	0.628556	2.62067	-1289.2	-0.333333	0	-33	0	-33	22.5	85020.2	10	2.77507	1.64533	0.497976	piRNA	dsim	8530425	wxd1_rep1
Dsim_3L:23773912-23779690	5778	-16.0314	0.778752	0.56677	0.359194	18	0.195652	0.371118	19	1.46667	3105.59	0.574939	2.4451	-1295.9	1	0	-33	0	-33	25	68323	26	1.64533	2.00471	0.582298	piRNA	dsim	8530425	wxd1_rep1
Dsim_3L:23825432-23829327	3895	-13.6986	0.90738	0.663307	0.409752	25	0.415323	0.209677	19	-0.503953	0	0.649551	2.99363	-1254.2	-0.333333	0	-33	0	-33	23.5	90725.8	10	1.62757	2.35806	0.796371	piRNA	dsim	8530425	wxd1_rep1
Dsim_3L:23826175-23829061	2886	-12.7897	0.925305	0.657277	0.450161	25	0.43662	0.204225	19	-0.503953	0	0.63271	2.41693	-988.4	-0.333333	0	-33	0	-33	23.5	105634	10	1.42355	2.35806	0.852113	piRNA	dsim	8530425	wxd1_rep1
Dsim_3L:23833459-23836934	3475	-13.9029	0.774893	0.768991	0.302606	18	0.28512	0.568158	20	2.52876	14568.2	0.648058	2.78605	-970	1.17851	0	-33	0	-33	23.5	246618	10	0.534857	3.04123	0.413111	piRNA	dsim	8530425	wxd1_rep1
Dsim_3L:23834058-23836370	2312	-9.17261	0.937488	0.61949	0.459014	26	0.542923	0.180975	23	1.19737	4640.37	0.655709	2.58706	-734.7	1.39864	0	-33	0	-33	23.5	549884	10	0.771517	3.04123	0.714617	piRNA	dsim	8530425	wxd1_rep1
Dsim_3L:24040943-24046464	5521	-15.4349	0.974	0.62543	0.401936	25	0.350515	0.303265	26	0.00786439	6013.75	0.64952	2.60683	-1699.4	0.835504	0	-33	0	-33	25.5	404639	10	0.358718	2.13896	0.69244	piRNA	dsim	8530425	wxd1_rep1
Dsim_3L:24069038-24072916	3878	-17.953	0.957275	0.593531	0.527278	23	0.177448	0.362762	25	0.0378641	2622.38	0.620939	2.8551	-1496	0.942809	0	-33	0	-33	24.5	318182	10	1.63162	3.39405	0.729021	piRNA	dsim	8530425	wxd1_rep1
Dsim_3L:24069038-24074296	5258	-22.566	0.964117	0.667237	0.527734	24	0.174087	0.32363	25	-0.304997	1712.33	0.624192	2.75171	-2011.4	0.632455	0	-33	0	-33	24.5	263699	10	1.63171	3.00327	0.714041	piRNA	dsim	8530425	wxd1_rep1
Dsim_3L:24073911-24079501	5590	-15.3292	0.899782	0.655926	0.41173	18	0.204833	0.418872	20	-0.353645	1150.75	0.529875	3.05426	-1309.04	-0.471405	0	-33	0	-33	24.5	110472	10	1.35305	2.48243	0.741082	piRNA	dsim	8530425	wxd1_rep1
Dsim_3L:24074297-24079183	4886	-13.549	0.880427	0.609579	0.386329	18	0.222061	0.46299	20	-0.353645	1451.38	0.514122	2.9994	-1094.84	1.76383	0	-33	0	-33	24.5	62409.3	10	1.99955	2.48243	0.753266	piRNA	dsim	8530425	wxd1_rep1
Dsim_3L:24111188-24113440	2252	-13.2528	0.9535	0.666667	0.436903	25	0.526806	0.254079	22	-0.471405	0	0.64476	2.22875	-763.3	-0.150012	0	-33	0	-33	24.5	158508	10	1.244	1.64533	0.855478	piRNA	dsim	8530425	wxd1_rep1
Dsim_3L:24121349-24124215	2866	-11.3428	0.950892	0.652741	0.478451	24	0.391645	0.208877	24	-0.503953	0	0.637125	2.81553	-992.8	2.35702	0	-33	0	-33	25	224543	10	2.90856	2.01605	0.819843	piRNA	dsim	8530425	wxd1_rep1
Dsim_3L:24162445-24165971	3526	-15.6965	0.978203	0.636293	0.384217	25	0.341122	0.450156	26	1.86462	4672.9	0.533749	2.1331	-779.33	-0.416667	0	-33	0	-33	25.5	399533	10	1.65531	1.38313	0.645639	piRNA	dsim	8530425	wxd1_rep1
Dsim_3L:24162507-24165202	2695	-13.5646	0.983268	0.644679	0.39387	25	0.337731	0.466139	26	2.00278	5277.05	0.535807	2.09901	-609	-0.438397	0	-33	0	-33	25.5	436236	10	1.83326	1.3344	0.622691	piRNA	dsim	8530425	wxd1_rep1
Dsim_3L:24220085-24223519	3434	-11.813	0.855669	0.762092	0.543496	18	0.155556	0.465359	28	-0.333333	0	0.624345	2.19981	-1230.2	-0.333333	0	-33	0	-33	24.5	184314	10	1.11386	1.64533	0.498039	piRNA	dsim	8530425	wxd1_rep1
Dsim_3L:24221127-24223258	2131	-10.1238	0.856091	0.776824	0.543405	18	0.157368	0.484978	28	-0.333333	0	0.638198	1.71414	-783.1	-0.666667	0	-33	0	-33	24.5	201717	10	1.20392	1.64533	0.470672	piRNA	dsim	8530425	wxd1_rep1
Dsim_3L:24262138-24265342	3204	-14.0537	0.822169	0.756579	0.36179	18	0.303947	0.343421	26	0.298609	3947.37	0.625468	3.15169	-819.2	-0.333333	0	-33	0	-33	25	121053	10	0.217671	3.39405	0.44079	piRNA	dsim	8530425	wxd1_rep1
Dsim_3L:24280001-24282877	2876	-12.8756	0.952189	0.605523	0.430199	24	0.489152	0.248521	19	-0.843274	0	0.634214	2.13618	-945.7	-0.503953	0	-33	0	-33	25.25	108481	10	0.97092	1.00208	0.854043	piRNA	dsim	8530425	wxd1_rep1
Dsim_3L:24280001-24283949	3948	-15.6682	0.94825	0.64812	0.445902	24	0.446617	0.261654	19	-0.764719	0	0.642857	2.27064	-1407.9	-0.333333	0	-33	0	-33	24	117293	10	0.97092	0.895644	0.837594	piRNA	dsim	8530425	wxd1_rep1
Dsim_3L:24285096-24287924	2828	-10.354	0.849315	0.671968	0.334352	19	0.638171	0.157058	20	-0.406663	0	0.608204	2.48773	-712.1	-33	0	-33	0	-33	20.5	369781	10	2.68086	2.90856	0.487077	piRNA	dsim	8530425	wxd1_rep1
Dsim_3L:24285367-24287423	2056	-8.67446	0.846921	0.687912	0.325435	19	0.674725	0.140659	20	-0.406663	0	0.633269	2.40053	-520.1	-33	0	-33	0	-33	20.5	408791	10	2.68086	2.90856	0.446154	piRNA	dsim	8530425	wxd1_rep1
Dsim_3L:24302151-24305979	3828	-11.3595	0.893963	0.617201	0.387363	18	0.430017	0.234401	21	-0.235702	1686.34	0.647858	2.9718	-1182.9	1.20009	0	-33	0	-33	24.5	77571.7	10	1.46601	2.55563	0.748735	piRNA	dsim	8530425	wxd1_rep1
Dsim_3L:24303820-24305979	2159	-8.57917	0.870838	0.700521	0.395596	18	0.434896	0.21875	27	-0.503953	0	0.640111	2.98251	-666.4	-0.503953	0	-33	0	-33	24.5	98958.3	10	1.23311	2.35203	0.679688	piRNA	dsim	8530425	wxd1_rep1
Dsim_3L:24355144-24357958	2814	-17.0962	0.925344	0.826458	0.512245	25	0.133713	0.277383	25	1.05409	2844.95	0.616915	2.88015	-983	-33	0	-33	0	-33	25.5	76813.7	10	0.908842	2.90856	0.788051	piRNA	dsim	8530425	wxd1_rep1
Dsim_3L:24357959-24360635	2676	-10.8689	0.968434	0.814536	0.532135	24	0.0701754	0.233083	23	1.5396	5012.53	0.598655	3.14664	-963.2	-33	0	-33	0	-33	25	283208	10	2.90856	1.64533	0.766917	piRNA	dsim	8530425	wxd1_rep1
Dsim_3L:24370984-24373876	2892	-14.9804	0.915336	0.784182	0.445962	25	0.296247	0.237265	21	0.510697	6702.41	0.628631	2.97322	-946.7	-0.430119	0	-33	0	-33	25.5	121984	10	2.35047	1.64533	0.849866	piRNA	dsim	8530425	wxd1_rep1
Dsim_3L:24383280-24386042	2762	-8.11612	0.901272	0.57672	0.510205	18	0.399471	0.193122	28	-0.503953	0	0.646633	2.86004	-991	-33	0	-33	0	-33	25.5	174603	10	2.68499	1.63832	0.693122	piRNA	dsim	8530425	wxd1_rep1
Dsim_3L:24393111-24401677	8566	-18.4655	0.953494	0.631166	0.416247	24	0.46861	0.303812	19	-0.825064	0	0.635536	2.49735	-2675.7	-0.333333	0	-33	0	-33	25	99775.8	10	0.712018	2.90856	0.807175	piRNA	dsim	8530425	wxd1_rep1
Dsim_3L:24398777-24401677	2900	-14.6941	0.933803	0.659091	0.438392	24	0.456439	0.223485	19	-0.491473	0	0.656552	2.57612	-989.2	0.414504	0	-33	0	-33	25	138258	10	1.14713	2.35047	0.854167	piRNA	dsim	8530425	wxd1_rep1
Dsim_3L:24541890-24544299	2409	-12.4732	0.775733	0.701342	0.410864	18	0.748322	0.136465	22.5	0.471405	1118.57	0.629307	2.9449	-796.5	1.48814	0	-33	0	-33	24.5	59284.1	10	1.1088	1.64533	0.4217	piRNA	dsim	8530425	wxd1_rep1
Dsim_3L:24541890-24546006	4116	-15.9535	0.705305	0.678315	0.430796	18	0.833413	0.0895165	26	0.228665	478.698	0.649174	1.6741	-1466.2	1.48814	0	-33	0	-33	24	32551.5	10	0.643906	1.64533	0.259454	piRNA	dsim	8530425	wxd1_rep1
Dsim_3L:24556384-24559199	2815	-18.4628	0.945934	0.636909	0.308353	25	0.576283	0.307795	21	-0.607575	1998.67	0.544227	2.03366	-566.5	-0.333333	0	-33	0	-33	25.5	129247	10	0.82164	2.90856	0.63491	piRNA	dsim	8530425	wxd1_rep1
Dsim_3L:24556384-24560275	3891	-21.4516	0.947239	0.643319	0.313698	25	0.549569	0.29903	21	-0.539268	2693.97	0.545361	2.14589	-816.8	-0.57755	0	-33	0	-33	25.5	115302	10	0.865125	2.90856	0.671336	piRNA	dsim	8530425	wxd1_rep1
Dsim_3L:24568442-24570822	2380	-12.0658	0.775439	0.705287	0.40962	18	0.754781	0.133858	23.6667	0.471405	1124.86	0.62437	2.97384	-778.9	1.48814	0	-33	0	-33	24.5	71991	10	0.576219	1.11192	0.416198	piRNA	dsim	8530425	wxd1_rep1
Dsim_3L:24568442-24571468	3026	-14.8912	0.796011	0.647	0.415077	18	0.714	0.13	23.6667	0.471405	1000	0.635162	3.00736	-1005.9	1.52023	0	-33	0	-33	24.5	71000	10	0.576219	1.11192	0.465	piRNA	dsim	8530425	wxd1_rep1
Dsim_3L:24594753-24598746	3993	-16.9684	0.953322	0.571984	0.455893	24	0.36965	0.293774	24	-0.250107	7782.1	0.651139	3.05214	-1386.8	-0.933333	0	-33	0	-33	24.5	536965	10	0.921608	1.7744	0.690662	piRNA	dsim	8530425	wxd1_rep1
Dsim_3L:24600317-24604676	4359	-14.9652	0.975854	0.631858	0.4052	25	0.343363	0.482301	26	1.60027	5309.73	0.531773	2.8308	-990.7	2.66667	0	-33	0	-33	25.5	444248	10	1.79411	1.27336	0.687611	piRNA	dsim	8530425	wxd1_rep1
Dsim_3L:24601598-24604676	3078	-13.4373	0.981166	0.647901	0.41041	25	0.35687	0.475191	26	1.94872	5725.19	0.523067	2.67167	-689.5	-33	0	-33	0	-33	25.5	479008	10	1.79411	1.27336	0.674618	piRNA	dsim	8530425	wxd1_rep1
Dsim_3L:24617672-24632289	14617	-30.8441	0.907436	0.528521	0.341685	21	0.289085	0.365493	22	0.516203	16901.4	0	-33	0	-33	0	-33	0	-33	22	35563.4	10	0.397574	2.90856	0.755282	piRNA	dsim	8530425	wxd1_rep1
Dsim_3L:24618281-24621062	2781	-12.9652	0.939391	0.625	0.430881	24	0.477941	0.244485	19	0.333333	1838.23	0.618483	2.97489	-882.8	2.41119	0	-33	0	-33	26	126838	10	0.96848	1.64533	0.829044	piRNA	dsim	8530425	wxd1_rep1
Dsim_3L:24618281-24623301	5020	-17.288	0.941655	0.660517	0.448387	24	0.442804	0.257073	19	0.119737	1230.01	0.640637	3.00846	-1758	2.41119	0	-33	0	-33	24.5	116851	10	0.285047	2.90856	0.833948	piRNA	dsim	8530425	wxd1_rep1
Dsim_3L:24639642-24643635	3993	-17.0182	0.954797	0.559133	0.460847	21	0.226675	0.399474	21	-0.243185	7884.36	0.576008	2.85165	-1140	-0.453267	0	-33	0	-33	24.5	542707	10	0.353858	2.66032	0.700394	piRNA	dsim	8530425	wxd1_rep1
Dsim_3L:24669356-24672269	2913	-13.3507	0.791272	0.663276	0.411118	18	0.720244	0.128179	19	1.05409	1017.29	0.632338	2.36399	-952.6	1.48814	0	-33	0	-33	24.5	63072.2	10	0.888244	1.64533	0.463886	piRNA	dsim	8530425	wxd1_rep1
Dsim_3L:24669356-24673448	4092	-16.6648	0.811503	0.608924	0.420966	18	0.660542	0.133858	19	0.333333	874.891	0.640763	2.52402	-1393.4	0.648083	0	-33	0	-33	24.5	55993	10	0.776939	2.90856	0.523185	piRNA	dsim	8530425	wxd1_rep1
Dsim_3L:24727977-24730058	2081	-10.7774	0.891765	0.690608	0.405518	18	0.483425	0.198895	20	0.671034	9668.51	0.663143	2.6462	-736.4	1.33333	0	-33	0	-33	26	182320	10	1.54878	3.39405	0.593923	piRNA	dsim	8530425	wxd1_rep1
Dsim_3L:24736240-24738841	2601	-23.7196	0.95618	0.828679	0.331023	26	0.64232	0.2884	26	0.447232	10204.1	0.619762	2.98582	-620.6	-0.761905	0	-33	0	-33	24.3333	17722.9	7	0.70981	1.64533	0.786251	piRNA	dsim	8530425	wxd1_rep1
Dsim_3L:24736240-24741668	5428	-33.2016	0.953446	0.80823	0.336628	26	0.675094	0.293437	20	1.30377	14792.9	0.606485	2.91387	-1336.25	1.36977	0	-33	0	-33	24.5	15330.8	7	0.522556	1.64533	0.784024	piRNA	dsim	8530425	wxd1_rep1
Dsim_3L:24738844-24741668	2824	-24.6849	0.921507	0.788058	0.34234	26	0.708445	0.29801	20	1.83103	19365.2	0.600567	2.88606	-695.25	1.81703	0	-33	0	-33	24.5	13986	9	1.38313	0.342584	0.781603	piRNA	dsim	8530425	wxd1_rep1
Dsim_3L:24778612-24782370	3758	-14.8653	0.949008	0.682099	0.440179	24	0.228395	0.350309	24	-0.379768	1543.21	0.622672	2.846	-1324.7	-0.333333	0	-33	0	-33	25.25	81790.1	10	0.985935	2.71163	0.844136	piRNA	dsim	8530425	wxd1_rep1
Dsim_3L:24800201-24809877	9676	-21.0284	0.965423	0.573089	0.445756	21	0.265742	0.224138	22	1.39423	26236.9	0.600455	2.39296	-3096.4	2.52838	0	-33	0	-33	24.5	256372	28	0.860402	0.816563	0.662294	piRNA	dsim	8530425	wxd1_rep1
Dsim_3L:24860047-24864904	4857	-22.6763	0.968174	0.67518	0.524973	24	0.468073	0.268184	19	0.830116	3886.73	0.66502	2.58701	-1964.9	-0.042419	0	-33	0	-33	24.5	377568	10	1.21805	2.35047	0.706274	piRNA	dsim	8530425	wxd1_rep1
Dsim_3L:24861287-24864208	2921	-16.8425	0.962474	0.600188	0.529573	24	0.429915	0.212606	19	1.02567	6585.14	0.672373	2.79247	-1222.9	0.0858875	0	-33	0	-33	24.5	372531	10	1.28219	0.767412	0.735654	piRNA	dsim	8530425	wxd1_rep1
Dsim_3L:24867438-24871486	4048	-8.54166	0.950809	0.644315	0.299232	25	0.279883	0.329446	26	-0.791667	0	0.666996	2.57249	-1270	-1.05409	0	-33	0	-33	25.5	145773	10	1.74483	2.90856	0.673469	piRNA	dsim	8530425	wxd1_rep1
Dsim_3L:24868039-24871486	3447	-8.85087	0.951431	0.643275	0.298797	25	0.280702	0.327485	26	-0.791667	0	0.652161	2.57249	-1067	-0.333333	0	-33	0	-33	25.5	146199	10	1.74483	2.90856	0.672515	piRNA	dsim	8530425	wxd1_rep1
Dsim_3L:24916458-24918930	2472	-8.7862	0.84241	0.602083	0.360862	18	0.3125	0.295833	20	-0.206824	4166.67	0.669903	2.76388	-761.7	-0.503953	0	-33	0	-33	25.5	43750	16	2.48331	2.77507	0.627083	piRNA	dsim	8530425	wxd1_rep1
Dsim_3L:24978602-24981730	3128	-10.3441	0.952111	0.528474	0.516981	23	0.220957	0.348519	24	-0.333333	0	0.640665	3.00775	-1202.5	1.78885	0	-33	0	-33	25.5	166287	10	3.19256	2.35047	0.824601	piRNA	dsim	8530425	wxd1_rep1
Dsim_3L:24978602-24983641	5039	-16.718	0.954995	0.557554	0.50322	25	0.205036	0.35012	23.8	-0.596285	0	0.656876	3.05137	-1937.3	1.66667	0	-33	0	-33	25.5	188249	10	1.18194	2.35047	0.822542	piRNA	dsim	8530425	wxd1_rep1
Dsim_3L:25091221-25095338	4117	-17.21	0.937529	0.689655	0.441942	24	0.241379	0.327586	19	-0.65157	0	0.622784	2.48066	-1401	-33	0	-33	0	-33	25	107427	10	0.709245	3.39405	0.811671	piRNA	dsim	8530425	wxd1_rep1
Dsim_3L:25091523-25095274	3751	-16.8475	0.936506	0.688022	0.439132	24	0.239554	0.337047	19	-0.65157	0	0.621168	2.4747	-1235.3	-33	0	-33	0	-33	25	112813	10	0.600674	3.39405	0.811978	piRNA	dsim	8530425	wxd1_rep1
Dsim_3L:25114940-25122659	7719	-23.5419	0.839679	0.75	0.29098	19	0.489193	0.430836	19	-0.320904	1440.92	0.640498	2.56011	-1989.8	2.11021	0	-33	0	-33	23	18732	22	0.832181	0.461571	0.59366	piRNA	dsim	8530425	wxd1_rep1
Dsim_3L:25117769-25122659	4890	-19.6883	0.85756	0.855464	0.27961	19	0.495887	0.47121	19	0	1175.09	0.625358	2.26457	-1163.2	2.2188	0	-33	0	-33	23	28202.1	5	2.61383	0.261433	0.601645	piRNA	dsim	8530425	wxd1_rep1
Dsim_3L:25126783-25131032	4249	-6.9585	0.882554	0.503906	0.303092	18	0.398438	0.421875	22	-0.503953	3906.25	0.591198	3.10774	-1189.14	-33	0	-33	0	-33	19	226562	10	2.71163	2.14621	0.710938	piRNA	dsim	8530425	wxd1_rep1
Dsim_3L:25183124-25187181	4057	-16.4965	0.950134	0.689281	0.451133	23	0.236092	0.325645	22	-0.272166	1356.85	0.617698	2.86327	-1456.9	-33	0	-33	0	-33	24.5	128901	10	1.01435	3.00327	0.837178	piRNA	dsim	8530425	wxd1_rep1
Dsim_3L:25187455-25192606	5151	-10.4499	0.943614	0.650655	0.290105	19	0.401747	0.427948	25	-0.392192	2183.41	0.590953	2.59472	-1429.37	1.89737	0	-33	0	-33	26	218341	24	2.66032	0.517413	0.663756	piRNA	dsim	8530425	wxd1_rep1
Dsim_3L:25204028-25207321	3293	-13.3109	0.909609	0.70946	0.367359	24	0.41723	0.29223	26	-0.294293	1689.19	0.597024	2.99427	-885.9	1.12581	0	-33	0	-33	24.5	128378	10	1.25378	0.785614	0.755068	piRNA	dsim	8530425	wxd1_rep1
Dsim_3L:25232044-25235946	3902	-11.8339	0.950591	0.681223	0.437686	25	0.242358	0.331878	22	-0.800327	0	0.609944	2.8899	-1221.2	-33	0	-33	0	-33	24.5	124454	10	1.46561	3.00327	0.799127	piRNA	dsim	8530425	wxd1_rep1
Dsim_3L:25293749-25298246	4497	-13.3456	0.880103	0.604348	0.386595	18	0.215942	0.469565	23	-0.25542	1449.28	0.516789	3.08066	-1014.4	1.76383	0	-33	0	-33	24.5	62318.8	10	1.94334	2.48243	0.749275	piRNA	dsim	8530425	wxd1_rep1
Dsim_3L:25305304-25308011	2707	-12.527	0.982904	0.657631	0.40493	25	0.365462	0.464859	26	2.48571	6024.1	0.52826	2.51315	-625.9	-0.333333	0	-33	0	-33	25.5	501004	10	2.77507	1.04587	0.664659	piRNA	dsim	8530425	wxd1_rep1
Dsim_3L:25346690-25351702	5012	-14.7704	0.763702	0.845609	0.343055	18	0.0892351	0.590652	24	0.159364	2832.86	0.509976	2.60219	-1000.3	-33	0	-33	0	-33	25	101983	10	2.77507	2.61383	0.38102	piRNA	dsim	8530425	wxd1_rep1
Dsim_3L:25419535-25425284	5749	-9.80629	0.867616	0.606061	0.438269	18	0.424242	0.445454	26.3333	-0.416667	0	0.628631	3.02085	-1727.3	-33	0	-33	0	-33	25.5	127273	10	2.90856	-33	0.618182	piRNA	dsim	8530425	wxd1_rep1
Dsim_3L:25427147-25435449	8302	-19.95	0.939016	0.54151	0.462685	18	0.256153	0.215686	22	2.12233	11681.3	0.616719	1.9345	-2735.3	0.795046	0	-33	0	-33	24.5	279099	10	0.490438	0.534768	0.622445	piRNA	dsim	8530425	wxd1_rep1
Dsim_3L:25451668-25456138	4470	-17.2771	0.892586	0.515917	0.437566	18	0.230516	0.271131	22	-0.0764719	1097.69	0.630425	3.2357	-1541.8	-33	0	-33	0	-33	24.5	86717.9	10	0.939558	3.00327	0.677278	piRNA	dsim	8530425	wxd1_rep1
Dsim_3L:25453779-25456138	2359	-11.8122	0.94241	0.614458	0.428156	18	0.320482	0.322892	25	0.843274	2409.64	0.612972	3.05401	-756.9	-33	0	-33	0	-33	24.5	163855	10	1.18784	3.00327	0.855422	piRNA	dsim	8530425	wxd1_rep1
Dsim_3L:25477105-25482591	5486	-24.1637	0.948393	0.648824	0.303442	25	0.537307	0.316707	20	-0.0682193	4460.66	0.563252	2.59319	-1126.57	1.51186	0	-33	0	-33	25.5	193836	10	0.961899	3.39405	0.667883	piRNA	dsim	8530425	wxd1_rep1
Dsim_3L:25505224-25508516	3292	-19.9075	0.944189	0.863461	0.506374	25	0.132692	0.308654	27	1.61881	3846.15	0.604496	3.06233	-1170.1	-0.503953	0	-33	0	-33	24.5	96153.9	10	2.10193	3.00327	0.788462	piRNA	dsim	8530425	wxd1_rep1
Dsim_3L:25520178-25524395	4217	-16.8092	0.929097	0.666667	0.456217	24	0.246867	0.302005	19	-0.503953	0	0.626038	2.32511	-1497	-0.503953	0	-33	0	-33	24.5	119048	10	0.452304	3.00327	0.799499	piRNA	dsim	8530425	wxd1_rep1
Dsim_3L:25521290-25524395	3105	-15.2363	0.9234	0.649842	0.443687	18	0.258675	0.318612	19	-0.333333	0	0.621578	2.14311	-1047.3	-0.333333	0	-33	0	-33	24.5	137224	10	0.600503	3.00327	0.791798	piRNA	dsim	8530425	wxd1_rep1
Dsim_3L:25620197-25622325	2128	-14.0861	0.966576	0.777188	0.517706	24	0.180371	0.262599	26	2.00278	3978.78	0.625	2.46264	-733.8	2.66667	0	-33	0	-33	24.5	91511.9	10	0.838945	2.66032	0.661804	piRNA	dsim	8530425	wxd1_rep1
Dsim_3L:25639813-25655617	15804	-27.1582	0.942412	0.652494	0.407206	24	0.312756	0.309894	27	1.01234	4497.14	0	-33	0	-33	0	-33	0	-33	25.5	200327	10	0.46678	1.78501	0.74816	piRNA	dsim	8530425	wxd1_rep1
Dsim_3L:25640602-25647068	6466	-20.0436	0.923597	0.669838	0.441608	24	0.247383	0.319696	19	-0.306858	951.475	0.630065	2.48093	-2188.2	-33	0	-33	0	-33	24.5	100856	10	0.481125	3.39405	0.816365	piRNA	dsim	8530425	wxd1_rep1
Dsim_3L:25646530-25654896	8366	-17.3403	0.953805	0.641045	0.390851	25	0.352037	0.305918	27	1.10554	6149.12	0.616543	2.82601	-2349.19	1.52911	0	-33	0	-33	25.5	318985	10	0.478443	3.00327	0.702537	piRNA	dsim	8530425	wxd1_rep1
Dsim_3L:25648229-25650998	2769	-13.1188	0.978961	0.655769	0.405386	25	0.353846	0.323077	27	1.6	6730.77	0.655832	2.52553	-854.1	2.35702	0	-33	0	-33	25.5	399038	10	0.32068	3.00327	0.683654	piRNA	dsim	8530425	wxd1_rep1
Dsim_3L:25648229-25652630	4401	-14.6353	0.975232	0.643919	0.399633	25	0.355206	0.314086	27	1.23507	6124.23	0.666212	2.71264	-1357.6	1.43934	0	-33	0	-33	25.5	363080	10	0.534636	3.00327	0.699038	piRNA	dsim	8530425	wxd1_rep1
Dsim_3L:25731275-25744407	13132	-26.1662	0.852117	0.562975	0.392088	18	0.184277	0.346295	20	0.0844491	1972.39	0	-33	0	-33	0	-33	0	-33	24.5	118907	10	0.846555	2.30221	0.490561	piRNA	dsim	8530425	wxd1_rep1
Dsim_3L:25738035-25744092	6057	-18.6251	0.92974	0.66642	0.452998	24	0.199407	0.320237	20	-0.254	2223.87	0.541522	2.83883	-1381.39	-0.597505	0	-33	0	-33	24.5	163084	10	0.708866	2.35806	0.730912	piRNA	dsim	8530425	wxd1_rep1
Dsim_3L:25739523-25742009	2486	-14.8561	0.969614	0.682505	0.515802	24	0.206263	0.287257	20	-0.0972433	2159.83	0.610619	2.31913	-832.4	1.42539	0	-33	0	-33	24.5	237581	10	0.649448	2.35806	0.700864	piRNA	dsim	8530425	wxd1_rep1
Dsim_3L:25746127-25748488	2361	-12.2091	0.978269	0.676201	0.407997	25	0.337529	0.29405	26	1.77215	5720.82	0.630241	2.36621	-681.1	1.97911	0	-33	0	-33	25.5	287185	10	0.983861	2.90856	0.685355	piRNA	dsim	8530425	wxd1_rep1
Dsim_3L:25771873-25776934	5061	-13.5566	0.866397	0.613095	0.30571	18	0.468254	0.339286	22	1.4792	11904.8	0.60739	2.5601	-1295.6	-0.333333	0	-33	0	-33	27.5	154762	10	3.20627	0.0966553	0.630952	piRNA	dsim	8530425	wxd1_rep1
Dsim_3L:25788806-25792440	3634	-7.96066	0.912533	0.650943	0.321006	26	0.485849	0.386792	19	-0.333333	0	0.587232	2.2254	-1043.2	-33	0	-33	0	-33	25.5	235849	10	2.3745	2.26883	0.768868	piRNA	dsim	8530425	wxd1_rep1
Dsim_3L:25824334-25827171	2837	-12.4514	0.951384	0.625483	0.424288	24	0.496139	0.289575	25	0.611775	1930.5	0.620374	2.73194	-950.1	-0.333333	0	-33	0	-33	24.5	111969	10	0.973195	1.70567	0.843629	piRNA	dsim	8530425	wxd1_rep1
Dsim_3L:25824334-25829443	5109	-17.4623	0.937653	0.670872	0.443922	24	0.440367	0.279817	25	-0.298142	1146.79	0.636524	2.70949	-1828.3	-0.503953	0	-33	0	-33	24.5	100917	10	0.342552	2.35047	0.823395	piRNA	dsim	8530425	wxd1_rep1
Dsim_3L:25827189-25829443	2254	-10.6359	0.916602	0.737288	0.472653	18	0.358757	0.265537	24	-0.71166	0	0.657498	2.57096	-865.5	-0.333333	0	-33	0	-33	23.5	127119	10	1.89814	2.35047	0.793785	piRNA	dsim	8530425	wxd1_rep1
Dsim_3L:25837776-25844089	6313	-24.7982	0.911573	0.746169	0.371804	21	0.147235	0.415723	26	1.06875	8660.89	0.560748	2.99771	-1560.34	-0.800327	0	-33	0	-33	26	329114	10	1.53051	2.35047	0.718188	piRNA	dsim	8530425	wxd1_rep1
Dsim_3L:25882643-25885186	2543	-1.98438	0.884114	0.62963	0.475982	18	0.296296	0.148148	24.5	-33	0	0.614235	3.19256	-804.9	-33	0	-33	0	-33	25.5	148148	NA	-33	-33	0.888889	piRNA	dsim	8530425	wxd1_rep1
Dsim_3R:1069986-1072139	2153	-15.0583	0.965721	0.631325	0.535581	24	0.246988	0.29759	26	-0.0743038	2409.64	0.608453	2.76583	-810.9	-0.491473	0	-33	0	-33	24.5	296386	10	0.821082	2.29556	0.731325	piRNA	dsim	8530425	wxd1_rep1
Dsim_3R:13566981-13571137	4156	-14.734	0.911819	0.565079	0.378313	18	0.304762	0.369841	26	-0.749385	0	0.603465	2.74011	-1085.5	-0.484849	0	-33	0	-33	25.5	77777.8	10	1.02159	2.9647	0.809524	piRNA	dsim	8530425	wxd1_rep1
Dsim_3R:14589682-14593853	4171	-14.7067	0.911859	0.566246	0.377852	24	0.421136	0.312303	26	-0.749385	0	0.601774	2.7416	-1065.4	-33	0	-33	0	-33	25.5	94637.2	10	0.779701	1.23416	0.809148	piRNA	dsim	8530425	wxd1_rep1
Dsim_3R:14591283-14593853	2570	-10.9443	0.924483	0.567633	0.389107	24	0.425121	0.258454	26	-0.494633	0	0.629572	2.76803	-698.4	-33	0	-33	0	-33	25.5	96618.4	10	1.08984	1.26857	0.809179	piRNA	dsim	8530425	wxd1_rep1
Dsim_3R:15155971-15159080	3109	-19.051	0.973	0.756873	0.508786	24	0.157217	0.33677	26	0.915209	4295.53	0.618205	2.92833	-1169.4	-0.438397	0	-33	0	-33	24.5	298110	10	1.21925	3.00327	0.683849	piRNA	dsim	8530425	wxd1_rep1
Dsim_3R:15963168-15971565	8397	-20.1794	0.969938	0.582208	0.450771	21	0.214059	0.30699	22	1.66843	27799.8	0.656187	2.39394	-3027.9	0.953105	0	-33	0	-33	24.5	271644	28	1.29336	2.0049	0.665211	piRNA	dsim	8530425	wxd1_rep1
Dsim_3R:16713555-16716886	3331	-16.6937	0.960231	0.572414	0.467296	21	0.222571	0.405643	24	-0.0669181	10031.4	0.575803	2.8481	-986.1	-0.64369	0	-33	0	-33	24.5	582445	10	-0.00402583	1.69457	0.701567	piRNA	dsim	8530425	wxd1_rep1
Dsim_3R:167628-169904	2276	-10.9344	0.961651	0.623229	0.432029	25	0.464589	0.274788	19	-0.611775	0	0.633568	2.1085	-759.5	1.01695	0	-33	0	-33	24	133144	10	1.25367	1.64533	0.849858	piRNA	dsim	8530425	wxd1_rep1
Dsim_3R:171050-176472	5422	-14.3373	0.869613	0.61437	0.395174	18	0.227273	0.457478	27	-0.25542	1466.28	0.518628	2.95587	-1265	-0.333333	0	-33	0	-33	24.5	63049.8	10	1.89989	2.48243	0.746334	piRNA	dsim	8530425	wxd1_rep1
Dsim_3R:17857159-17865093	7934	-21.1756	0.883964	0.741742	0.318048	26	0.567568	0.262262	22	0.295738	10010	0.622637	2.85293	-2147.5	-0.608839	0	-33	0	-33	22	19019	16	1.36343	0.668967	0.844845	piRNA	dsim	8530425	wxd1_rep1
Dsim_3R:18693229-18701160	7931	-21.4529	0.882666	0.744787	0.318191	26	0.568024	0.261172	22	0.2716	9930.49	0.623629	2.87292	-2132.7	-0.606061	0	-33	0	-33	22	18867.9	16	1.5412	0.668967	0.84707	piRNA	dsim	8530425	wxd1_rep1
Dsim_3R:1889582-1891767	2185	-17.0926	0.962757	0.681553	0.430699	26	0.506149	0.2	19	0.943966	13592.2	0.588558	2.90591	-564.9	0.067953	0	-33	0	-33	25.5	513916	10	0.990258	3.00327	0.539806	piRNA	dsim	8530425	wxd1_rep1
Dsim_3R:1896475-1900924	4449	-22.9648	0.951562	0.658282	0.311895	25	0.245373	0.435216	25	-0.408314	3796.87	0.59519	2.17071	-1026.5	-0.25542	0	-33	0	-33	25.5	140959	10	1.04203	1.44514	0.669198	piRNA	dsim	8530425	wxd1_rep1
Dsim_3R:1897019-1900924	3905	-21.9282	0.954368	0.668186	0.308682	25	0.236575	0.431611	25	-0.393353	4052.68	0.581818	2.16175	-877.5	-0.0764719	0	-33	0	-33	25.5	143870	10	1.11511	1.44514	0.660588	piRNA	dsim	8530425	wxd1_rep1
Dsim_3R:1942207-1949858	7651	-24.9285	0.860425	0.65138	0.321863	18	0.495555	0.265325	25	-0.0318455	4211.51	0.639393	2.35224	-1831.8	0	0	-33	0	-33	25.5	40711.3	10	0.513836	2.90856	0.660739	piRNA	dsim	8530425	wxd1_rep1
Dsim_3R:1944734-1949824	5090	-20.1382	0.847156	0.607652	0.323169	18	0.438392	0.262646	25	-0.0796819	3891.05	0.625933	2.33885	-1186.6	-0.333333	0	-33	0	-33	25.5	56420.2	10	0.369559	2.90856	0.61738	piRNA	dsim	8530425	wxd1_rep1
Dsim_3R:19934362-19938410	4048	-17.1406	0.958925	0.568293	0.466831	21	0.221341	0.404878	24	-0.0669181	9756.1	0.572134	2.84756	-1208.6	-0.666667	0	-33	0	-33	24.5	566463	10	-0.00402583	1.69457	0.707317	piRNA	dsim	8530425	wxd1_rep1
Dsim_3R:19935079-19938410	3331	-16.6937	0.960231	0.572414	0.467296	21	0.222571	0.405643	24	-0.0669181	10031.4	0.575803	2.8481	-986.1	-0.64369	0	-33	0	-33	24.5	582445	10	-0.00402583	1.69457	0.701567	piRNA	dsim	8530425	wxd1_rep1
Dsim_3R:20349438-20352734	3296	-16.3401	0.960754	0.569043	0.466396	21	0.226718	0.407193	24	-0.0669181	10276.2	0.565534	2.83296	-949.9	-0.666667	0	-33	0	-33	24.5	595376	10	0.0120919	1.69457	0.696211	piRNA	dsim	8530425	wxd1_rep1
Dsim_3R:21054203-21062731	8528	-20.7693	0.967645	0.579985	0.449226	21	0.220247	0.301005	22	1.6621	27047.9	0.661116	2.39988	-3061.4	0.908141	0	-33	0	-33	24.5	264297	28	1.26922	1.7962	0.665765	piRNA	dsim	8530425	wxd1_rep1
Dsim_3R:225706-231695	5989	-17.3174	0.96506	0.636	0.375555	21	0.33	0.333333	26	1.4362	16000	0.633829	2.8237	-1656.3	2.08514	0	-33	0	-33	25.5	304000	10	0.658388	1.79411	0.728667	piRNA	dsim	8530425	wxd1_rep1
Dsim_3R:225970-231620	5650	-16.5288	0.967525	0.638135	0.378207	25	0.336813	0.327766	26	1.39169	14613.8	0.644248	2.80198	-1593	2.13333	0	-33	0	-33	25.5	317328	10	0.699326	1.79411	0.721642	piRNA	dsim	8530425	wxd1_rep1
Dsim_3R:22625068-22628364	3296	-15.945	0.963075	0.571522	0.464715	24	0.386022	0.266493	24	-0.04512	10450.7	0.658981	2.82658	-1129.9	-0.15164	0	-33	0	-33	24.5	621163	10	0.958265	2.35047	0.690398	piRNA	dsim	8530425	wxd1_rep1
Dsim_3R:22859050-22864282	5232	-9.63257	0.957762	0.624402	0.324184	25	0.382775	0.373206	25	0.214121	9569.38	0.579128	2.28781	-1470.57	1.63785	0	-33	0	-33	26	224880	10	-0.246313	0.571269	0.727273	piRNA	dsim	8530425	wxd1_rep1
Dsim_3R:23930726-23932897	2171	-14.5959	0.966965	0.550713	0.466107	24	0.350238	0.270206	24	0.035584	12678.3	0.677107	2.74725	-756.1	0.416667	0	-33	0	-33	24.5	732964	10	1.13569	2.35047	0.674327	piRNA	dsim	8530425	wxd1_rep1
Dsim_3R:24076617-24080664	4047	-17.1406	0.958925	0.568293	0.466831	21	0.221341	0.404878	24	-0.0669181	9756.1	0.572276	2.84756	-1208.6	-0.666667	0	-33	0	-33	24.5	566463	10	-0.00402583	1.69457	0.707317	piRNA	dsim	8530425	wxd1_rep1
Dsim_3R:24077333-24080664	3331	-16.6937	0.960231	0.572414	0.467296	21	0.222571	0.405643	24	-0.0669181	10031.4	0.575803	2.8481	-986.1	-0.64369	0	-33	0	-33	24.5	582445	10	-0.00402583	1.69457	0.701567	piRNA	dsim	8530425	wxd1_rep1
Dsim_3R:25352912-25360841	7929	-21.1994	0.870834	0.707061	0.31376	26	0.54103	0.249046	19	2.47486	62977.1	0.621264	2.84895	-2160.8	-0.606061	0	-33	0	-33	22	18129.8	20	1.36343	0.668967	0.804389	piRNA	dsim	8530425	wxd1_rep1
Dsim_3R:261423-264007	2584	-7.24937	0.911795	0.682081	0.328626	26	0.433526	0.352601	23.5	-0.333333	0	0.571981	2.43985	-647	2.66667	0	-33	0	-33	25.5	289017	9	1.64533	2.77507	0.843931	piRNA	dsim	8530425	wxd1_rep1
Dsim_3R:261423-265674	4251	-7.41781	0.94624	0.681081	0.335061	26	0.437838	0.335135	23.5	-0.333333	0	0.586685	2.46794	-1158.3	2.66667	0	-33	0	-33	25.5	270270	9	1.64533	2.77507	0.854054	piRNA	dsim	8530425	wxd1_rep1
Dsim_3R:28701195-28705192	3997	-17.2465	0.957947	0.570048	0.46127	21	0.222826	0.402778	24	-0.0669181	9661.84	0.579935	2.84822	-1152.3	-0.666667	0	-33	0	-33	24.5	560990	10	-0.0173441	1.69457	0.707126	piRNA	dsim	8530425	wxd1_rep1
Dsim_3R:28706558-28709782	3224	-25.395	0.929085	0.680158	0.307289	18	0.17769	0.406219	26	0.47254	12833.2	0.531638	2.51926	-713.3	-0.333333	0	-33	0	-33	23	68114.5	10	0.608637	1.93079	0.685094	piRNA	dsim	8530425	wxd1_rep1
Dsim_3R:28723919-28726725	2806	-12.7907	0.95531	0.659285	0.430189	25	0.349233	0.216354	21	2.13333	8517.89	0.66928	2.23997	-972.5	2.66667	0	-33	0	-33	25.5	115843	10	0.378963	3.39405	0.781942	piRNA	dsim	8530425	wxd1_rep1
Dsim_3R:28723919-28727622	3703	-13.1031	0.925327	0.665738	0.404927	18	0.317549	0.285515	21	1.69697	6963.79	0.672428	2.40321	-1243.5	-0.333333	0	-33	0	-33	25.5	94707.5	10	0.351374	3.39405	0.731198	piRNA	dsim	8530425	wxd1_rep1
Dsim_3R:28729125-28732398	3273	-13.2743	0.938357	0.620839	0.380596	24	0.392185	0.260492	22	-0.775947	1447.18	0.662389	2.82048	-1088.9	-0.596285	0	-33	0	-33	25.5	99855.3	10	0.715597	3.39405	0.746744	piRNA	dsim	8530425	wxd1_rep1
Dsim_3R:292824-300583	7759	-21.8014	0.899041	0.67514	0.459559	18	0.220707	0.257285	19	-0.311032	2479.85	0.64132	3.10703	-2573.24	1.0149	0	-33	0	-33	24.5	201488	10	0.433766	2.35047	0.623683	piRNA	dsim	8530425	wxd1_rep1
Dsim_3R:296301-299529	3228	-14.1256	0.931996	0.582721	0.477258	25	0.373162	0.268382	19	-0.611775	0	0.638786	3.11223	-1150.3	0.903343	0	-33	0	-33	25.5	202206	10	0.90167	1.64533	0.797794	piRNA	dsim	8530425	wxd1_rep1
Dsim_3R:307244-314255	7011	-21.7766	0.921702	0.704137	0.407876	25	0.505074	0.28025	19	-0.438397	780.64	0.660676	3.00183	-2308.3	1.32786	0	-33	0	-33	25.25	81186.6	10	0.672367	1.64533	0.813427	piRNA	dsim	8530425	wxd1_rep1
Dsim_3R:308320-313334	5014	-18.7881	0.945368	0.687225	0.44483	24	0.473568	0.288546	19	-0.1849	1101.32	0.648584	3.01093	-1757.6	1.23859	0	-33	0	-33	25.25	114537	10	0.753145	1.64533	0.838106	piRNA	dsim	8530425	wxd1_rep1
Dsim_3R:309647-312214	2567	-14.2844	0.929734	0.686539	0.433503	24	0.457692	0.221154	19	-0.629941	0	0.654461	3.03622	-862.1	1.19328	0	-33	0	-33	26	146154	10	1.89814	2.22712	0.830769	piRNA	dsim	8530425	wxd1_rep1
Dsim_3R:3233559-3236890	3331	-16.6929	0.959969	0.574202	0.467354	24	0.381966	0.264872	24	-0.0669181	10018.8	0.667067	2.84911	-1211	-0.160515	0	-33	0	-33	24.5	596744	10	0.912191	2.35047	0.701941	piRNA	dsim	8530425	wxd1_rep1
Dsim_3R:3233559-3237220	3661	-17.0265	0.95928	0.57362	0.466777	24	0.382209	0.265644	24	-0.0669181	9815.95	0.665392	2.84855	-1321.8	-0.174078	0	-33	0	-33	24.5	584663	10	0.90563	2.35047	0.705522	piRNA	dsim	8530425	wxd1_rep1
Dsim_3R:324848-329999	5151	-18.1267	0.869913	0.651487	0.468369	19	0.326208	0.159851	19	0.105409	929.368	0.626286	1.82225	-1667.4	0.133836	0	-33	0	-33	26	81784.4	10	1.71605	2.35047	0.608736	piRNA	dsim	8530425	wxd1_rep1
Dsim_3R:373152-375179	2027	-14.2781	0.950317	0.852792	0.512266	25	0.531303	0.186125	23	1.73205	6768.19	0.589048	2.64749	-658.4	-0.333333	0	-33	0	-33	25.5	126904	10	1.64533	0.312013	0.818951	piRNA	dsim	8530425	wxd1_rep1
Dsim_3R:378740-383002	4262	-14.7145	0.979997	0.655382	0.40145	25	0.349826	0.479167	26	1.07763	5208.33	0.51619	2.65834	-987.84	-0.333333	0	-33	0	-33	25.5	441840	10	1.70122	1.1893	0.694444	piRNA	dsim	8530425	wxd1_rep1
Dsim_3R:380242-383002	2760	-13.0057	0.984891	0.663188	0.40522	25	0.364326	0.479127	26	1.51228	5692.6	0.521739	2.50072	-630.8	-0.333333	0	-33	0	-33	25.5	482922	10	1.79411	1.1893	0.681214	piRNA	dsim	8530425	wxd1_rep1
Dsim_3R:454278-460289	6011	-17.5666	0.80109	0.695527	0.292131	18	0.171717	0.499279	19	0.0466474	4329	0.458825	2.86938	-920.74	-0.333333	0	-33	0	-33	20.5	66378.1	10	1.33027	1.64533	0.669553	piRNA	dsim	8530425	wxd1_rep1
Dsim_3R:473932-478910	4978	-14.4696	0.970738	0.522155	0.463351	24	0.32146	0.272806	22	2.27419	22589	0.603857	2.84818	-1512	-0.666667	0	-33	0	-33	24.5	343180	10	0.790412	1.82988	0.72285	piRNA	dsim	8530425	wxd1_rep1
Dsim_3R:532521-537753	5232	-9.56786	0.957559	0.62381	0.326075	25	0.37619	0.37381	25	0.214121	9523.81	0.586774	2.29064	-1477.37	1.63785	0	-33	0	-33	26	223810	10	-0.223434	0.571269	0.728571	piRNA	dsim	8530425	wxd1_rep1
Dsim_3R:5354813-5358861	4048	-17.1406	0.958925	0.568293	0.466831	21	0.221341	0.404878	24	-0.0669181	9756.1	0.572134	2.84756	-1208.6	-0.666667	0	-33	0	-33	24.5	566463	10	-0.00402583	1.69457	0.707317	piRNA	dsim	8530425	wxd1_rep1
Dsim_3R:5355530-5358861	3331	-16.6937	0.960231	0.572414	0.467296	21	0.222571	0.405643	24	-0.0669181	10031.4	0.575803	2.8481	-986.1	-0.64369	0	-33	0	-33	24.5	582445	10	-0.00402583	1.69457	0.701567	piRNA	dsim	8530425	wxd1_rep1
Dsim_3R:564947-570575	5628	-15.8032	0.95398	0.663807	0.418196	25	0.319033	0.443058	26	1.12911	5460.22	0.531272	2.70255	-1295.44	-0.503953	0	-33	0	-33	25.5	384555	10	1.48964	1.3965	0.658346	piRNA	dsim	8530425	wxd1_rep1
Dsim_3R:5816536-5819867	3331	-16.7241	0.960117	0.573133	0.46724	24	0.38167	0.264909	24	-0.0669181	10043.9	0.667067	2.8481	-1212.5	-0.130845	0	-33	0	-33	24.5	598242	10	0.938176	2.35047	0.701193	piRNA	dsim	8530425	wxd1_rep1
Dsim_3R:5816536-5820584	4048	-17.1922	0.958833	0.569249	0.466724	24	0.38011	0.264796	24	-0.0669181	9762.05	0.675395	2.84736	-1510.2	-0.256235	0	-33	0	-33	24.5	581452	10	0.931457	2.35047	0.707139	piRNA	dsim	8530425	wxd1_rep1
Dsim_3R:642700-648342	5642	-15.6646	0.978436	0.638174	0.397794	25	0.345228	0.492116	26	1.61874	4979.25	0.531726	2.64509	-1323	0.13538	0	-33	0	-33	25.5	406639	10	1.27626	1.24027	0.717012	piRNA	dsim	8530425	wxd1_rep1
Dsim_3R:6474661-6481450	6789	-39.1869	0.962777	0.802596	0.336372	26	0.63803	0.265559	22	0.226856	21764	0.635734	2.956	-1825.6	1.72514	0	-33	0	-33	22	34173.3	6	0.510506	1.64533	0.802024	piRNA	dsim	8530425	wxd1_rep1
Dsim_3R:650380-656017	5637	-16.7326	0.919184	0.676471	0.363603	18	0.411096	0.303476	26	1.77384	4679.14	0.649636	2.33373	-1701.5	1.5149	0	-33	0	-33	25.5	309492	14	0.188854	2.47436	0.595588	piRNA	dsim	8530425	wxd1_rep1
Dsim_3R:6900404-6908515	8111	-19.5524	0.970738	0.577787	0.45367	21	0.213557	0.303389	22	1.64938	28174.8	0.659845	2.38923	-2949.3	0.69482	0	-33	0	-33	24.5	279298	28	1.27337	2.0049	0.658228	piRNA	dsim	8530425	wxd1_rep1
Dsim_3R:7696327-7699623	3296	-16.1741	0.962559	0.569121	0.467309	24	0.380491	0.262274	24	-0.0561833	10335.9	0.667476	2.83003	-1171.5	-0.140962	0	-33	0	-33	24.5	614341	10	0.957819	2.35047	0.696382	piRNA	dsim	8530425	wxd1_rep1
Dsim_4:312870-316918	4048	-17.1406	0.958925	0.568293	0.466831	21	0.221341	0.404878	24	-0.0669181	9756.1	0.572134	2.84756	-1208.6	-0.666667	0	-33	0	-33	24.5	566463	10	-0.00402583	1.69457	0.707317	piRNA	dsim	8530425	wxd1_rep1
Dsim_4:313587-316918	3331	-16.6937	0.960231	0.572414	0.467296	21	0.222571	0.405643	24	-0.0669181	10031.4	0.575803	2.8481	-986.1	-0.64369	0	-33	0	-33	24.5	582445	10	-0.00402583	1.69457	0.701567	piRNA	dsim	8530425	wxd1_rep1
Dsim_4:394999-397581	2582	-11.0284	0.896403	0.701149	0.394246	18	0.463601	0.229885	20	0.242855	6385.7	0.67622	2.69413	-887.8	-0.666667	0	-33	0	-33	23.5	320562	10	0.941825	2.46363	0.582376	piRNA	dsim	8530425	wxd1_rep1
Dsim_U_4:160908-169800	8892	-19.0964	0.955745	0.506844	0.433165	21	0.210286	0.258399	22	2.12916	10783.9	0.640126	2.65446	-2997.4	0.816497	0	-33	0	-33	24.5	253007	10	1.02874	2.03845	0.586479	piRNA	dsim	8530425	wxd1_rep1
Dsim_U_4:191268-196915	5647	-15.1099	0.977558	0.640373	0.402659	25	0.363868	0.29771	26	1.849	5937.23	0.654861	2.64711	-1646.5	1.97951	0	-33	0	-33	25.5	388465	10	0.390369	2.24348	0.697201	piRNA	dsim	8530425	wxd1_rep1
Dsim_U_4:202894-209343	6449	-18.4946	0.967908	0.568452	0.485094	25	0.211806	0.289683	22	1.849	13392.9	0.655916	2.46792	-2355.8	0.387546	0	-33	0	-33	24.5	312500	10	1.16773	3.00327	0.659226	piRNA	dsim	8530425	wxd1_rep1
Dsim_U_4:203159-209343	6184	-17.595	0.965283	0.554482	0.487395	24	0.219538	0.267311	22	1.86484	14492.8	0.65718	2.48285	-2251.5	0.45982	0	-33	0	-33	24.5	334407	10	1.23303	3.00327	0.670424	piRNA	dsim	8530425	wxd1_rep1
Dsim_U_7:119451-122068	2617	-12.3738	0.972114	0.602424	0.46905	25	0.270303	0.267879	25	-0.179787	4848.48	0.634314	2.79797	-851.6	-33	0	-33	0	-33	25.5	149091	10	0.968958	2.35047	0.746667	piRNA	dsim	8530425	wxd1_rep1
Dsim_U_7:124372-128334	3962	-20.9204	0.903398	0.806916	0.321479	25	0.643612	0.317964	25	-0.236381	3842.46	0.642605	2.38259	-996	0.368105	0	-33	0	-33	24	19212.3	26	1.76965	0.189602	0.829971	piRNA	dsim	8530425	wxd1_rep1
Dsim_U_7:124735-128334	3599	-20.2462	0.907358	0.8125	0.328742	25	0.643443	0.318647	25	-0.288769	3073.77	0.640733	2.37055	-926.6	0.0828493	0	-33	0	-33	24	20491.8	26	1.89814	0.189602	0.831967	piRNA	dsim	8530425	wxd1_rep1
Dsim_U_7:145282-149273	3991	-14.4754	0.980564	0.647887	0.399714	25	0.356807	0.504225	26	1.96116	6572.77	0.513656	2.65347	-873.5	2.41209	0	-33	0	-33	25.5	462911	10	1.79411	1.32681	0.692019	piRNA	dsim	8530425	wxd1_rep1
Dsim_U_7:146898-149273	2375	-12.4394	0.986642	0.668763	0.40568	25	0.37631	0.502096	26	2.36294	7337.53	0.505263	2.43369	-527	1.76383	0	-33	0	-33	25.5	516772	10	1.79411	1.32681	0.67086	piRNA	dsim	8530425	wxd1_rep1
Dsim_U_7:162484-166532	4048	-17.1406	0.958925	0.568293	0.466831	21	0.221341	0.404878	24	-0.0669181	9756.1	0.572134	2.84756	-1208.6	-0.666667	0	-33	0	-33	24.5	566463	10	-0.00402583	1.69457	0.707317	piRNA	dsim	8530425	wxd1_rep1
Dsim_U_7:56504-62747	6243	-16.3865	0.915848	0.550469	0.371614	24	0.311033	0.350939	25	-0.655855	0	0.588179	2.95998	-1597.1	-0.549657	0	-33	0	-33	24.5	77464.8	10	1.983	2.77507	0.821596	piRNA	dsim	8530425	wxd1_rep1
Dsim_U_7:57243-61395	4152	-14.4796	0.911369	0.564784	0.378349	24	0.280731	0.355482	26	-0.514344	0	0.60212	2.84057	-1074.7	-0.503953	0	-33	0	-33	25.5	66445.2	10	1.00443	1.64533	0.832226	piRNA	dsim	8530425	wxd1_rep1
Dsim_U_7:99358-103051	3693	-19.4411	0.950316	0.612245	0.301728	25	0.556586	0.300557	23	-0.272166	3710.57	0.558895	1.89295	-808.5	1.53207	0	-33	0	-33	25.5	197897	10	1.14127	2.35047	0.659246	piRNA	dsim	8530425	wxd1_rep1
NC_004354.4:21910152-21979993	69841	-41.0991	0.982253	0.5	0.463464	25	0.45005	0.2392	25	0.783658	168.328	0	-33	0	-33	0	-33	0	-33	26	38669.1	10	1.05657	0.826759	0.286094	piRNA	dmel	204807195	ok_ovary_cs
NC_004354.4:22020538-22025643	5105	-40.3318	0.987214	0.5	0.492703	25	0.4824	0.1858	22	0.0469087	2837.66	0.628012	1.72964	-1455	0.780024	0	-33	0	-33	26	3868012	10	0.629761	0.0307741	0.206442	piRNA	dmel	204807195	ok_ovary_cs
NC_004354.4:22091410-22098547	7137	-41.4467	0.977525	0.5	0.481389	25	0.4533	0.23865	22	0.792068	2725.78	0.63444	2.50118	-2032.3	2.23481	0	-33	0	-33	26	1233539	10	0.928733	0.640702	0.239181	piRNA	dmel	204807195	ok_ovary_cs
NC_004354.4:22122104-22134002	11898	-40.9492	0.986726	0.5	0.480593	25	0.3893	0.2587	22	-0.135053	1364.48	0	-33	0	-33	0	-33	0	-33	25	66714	10	0.771524	0.928299	0.325528	piRNA	dmel	204807195	ok_ovary_cs
NC_004354.4:22250760-22260487	9727	-41.6496	0.973559	0.543213	0.439028	25	0.415232	0.310555	26	1.19778	5293.31	0.632672	2.53103	-2644.8	0.791667	0	-33	0	-33	26	170301	10	1.391	1.01216	0.284336	piRNA	dmel	204807195	ok_ovary_cs
NC_004354.4:22357559-22442229	84670	-38.3524	0.984318	0.5	0.518808	25	0.3201	0.29095	25	1.03972	28.8783	0	-33	0	-33	0	-33	0	-33	26	3005.49	10	0.628055	0.876532	0.241316	piRNA	dmel	204807195	ok_ovary_cs
NC_004354.4:22706185-22714415	8230	-37.7423	0.981857	0.5	0.548101	24	0.3229	0.1476	26	0.687298	17685.7	0.601215	2.65451	-2408.8	-0.450749	0	-33	0	-33	24.5	1330434	10	1.24756	1.02943	0.167268	piRNA	dmel	204807195	ok_ovary_cs
NC_004354.4:22870021-22876997	6976	-18.3456	0.91823	0.562226	0.487689	26	0.313324	0.203514	22	0.450749	5856.52	0.609805	1.8229	-2050.1	-0.497468	0	-33	0	-33	25.5	196193	10	1.91307	1.03888	0.81552	piRNA	dmel	204807195	ok_ovary_cs
NC_004354.4:22954129-22975231	21102	-43.1502	0.991769	0.629802	0.446326	25	0.515115	0.279317	26	1.03791	6048.55	0	-33	0	-33	0	-33	0	-33	25	143285	10	1.23165	1.03848	0.296434	piRNA	dmel	204807195	ok_ovary_cs
NC_004354.4:23003541-23010982	7441	-26.0347	0.986584	0.687618	0.406581	25	0.194567	0.375553	26	0.768947	30638	0.597769	2.66781	-1792.9	-0.596285	0	-33	0	-33	25.5	147189	10	0.0883339	0.957337	0.423879	piRNA	dmel	204807195	ok_ovary_cs
NC_004354.4:23179026-23203971	24945	-38.5018	0.983316	0.5	0.528971	25	0.3619	0.2216	26	0.974976	852.367	0	-33	0	-33	0	-33	0	-33	26.5	33791.8	10	0.655557	1.17023	0.227945	piRNA	dmel	204807195	ok_ovary_cs
NC_004354.4:23320016-23354850	34834	-37.562	0.987765	0.5	0.514675	25	0.3884	0.23645	25	1.02724	97.7437	0	-33	0	-33	0	-33	0	-33	25.5	8983.05	10	1.21568	1.03346	0.194655	piRNA	dmel	204807195	ok_ovary_cs
NC_004354.4:23383327-23394673	11346	-35.892	0.987177	0.5	0.543539	25	0.29695	0.2977	25	-0.00622788	72.7423	0	-33	0	-33	0	-33	0	-33	25.5	8981.54	10	0.331504	0.240395	0.192937	piRNA	dmel	204807195	ok_ovary_cs
NC_004354.4:23409165-23420526	11361	-37.2689	0.985071	0.5	0.547001	24	0.33075	0.2637	26	0.386418	125.578	0	-33	0	-33	0	-33	0	-33	25.5	11938.3	10	0.534053	0.283095	0.194072	piRNA	dmel	204807195	ok_ovary_cs
NC_004354.4:23433085-23438728	5643	-46.6322	0.906562	0.5	0.471713	25	0.26465	0.2801	22	0.684993	1541	0.613503	2.62616	-1660.7	1.65932	0	-33	0	-33	25.5	78473.1	10	0.786754	0.904366	0.199672	piRNA	dmel	204807195	ok_ovary_cs
NC_024512.1:2503002-2667002	164000	-39.9805	0.989635	0.5	0.508515	25	0.3788	0.26525	26	1.13531	273.116	0	-33	0	-33	0	-33	0	-33	25.5	19870.3	10	0.991483	0.90235	0.231829	piRNA	dmel	204807195	ok_ovary_cs
NC_024512.1:3040002-3274002	234000	-40.4594	0.986878	0.5	0.49651	25	0.3734	0.283	26	1.1966	33.9102	0	-33	0	-33	0	-33	0	-33	25.5	3241.1	10	0.546009	0.991046	0.309952	piRNA	dmel	204807195	ok_ovary_cs
NC_024512.1:3574242-3581661	7419	-39.0761	0.98519	0.5	0.553979	25	0.285	0.27065	25	0.921017	4141.07	0.596307	2.29831	-2234.8	0.840915	0	-33	0	-33	25.5	261042	10	0.374519	1.29701	0.296002	piRNA	dmel	204807195	ok_ovary_cs
NC_024512.1:846002-1053002	207000	-37.7209	0.985464	0.5	0.534289	24	0.3218	0.2594	27	0.238791	14.5319	0	-33	0	-33	0	-33	0	-33	25.5	1782.8	10	0.71701	1.40317	0.200089	piRNA	dmel	204807195	ok_ovary_cs
NT_033777.3:1138012-1172025	34013	-40.9065	0.987728	0.5	0.479883	25	0.32155	0.3213	26	0.529346	1623.69	0	-33	0	-33	0	-33	0	-33	26.5	114698	10	0.536333	0.621232	0.386945	piRNA	dmel	204807195	ok_ovary_cs
NT_033777.3:1196075-1208027	11952	-39.439	0.99069	0.5	0.518663	25	0.3923	0.22325	25	1.41151	7195.9	0	-33	0	-33	0	-33	0	-33	25.5	84902.9	10	0.68269	0.860974	0.251538	piRNA	dmel	204807195	ok_ovary_cs
NT_033777.3:1242082-1257253	15171	-40.4708	0.985394	0.5	0.44583	25	0.40595	0.28615	27	0.906832	2951.81	0	-33	0	-33	0	-33	0	-33	26	63287.9	10	0.507925	0.631964	0.34264	piRNA	dmel	204807195	ok_ovary_cs
NT_033777.3:1283314-1306975	23661	-40.7521	0.992022	0.5	0.503329	24	0.3858	0.28375	26	0.312438	915.569	0	-33	0	-33	0	-33	0	-33	25.5	121563	10	0.733003	0.970892	0.306282	piRNA	dmel	204807195	ok_ovary_cs
NT_033777.3:1362054-1368694	6640	-42.0977	0.989336	0.610314	0.496995	24	0.317547	0.286787	25	0.212067	8221.95	0.599699	2.45533	-1793.16	0.108505	0	-33	0	-33	25.5	239870	10	0.45028	0.0859219	0.394738	piRNA	dmel	204807195	ok_ovary_cs
NT_033777.3:1415007-1454997	39990	-41.5503	0.985144	0.5	0.508092	25	0.31995	0.32865	27	0.336117	1985.83	0	-33	0	-33	0	-33	0	-33	25	22748.8	10	0.937297	1.0179	0.410053	piRNA	dmel	204807195	ok_ovary_cs
NT_033777.3:1512001-1521028	9027	-40.4999	0.989638	0.504312	0.506729	24	0.43623	0.190479	25	1.84386	28371.9	0.594439	2.32526	-2225.9	0.209565	0	-33	0	-33	23	5552302	10	1.03542	1.47641	0.222797	piRNA	dmel	204807195	ok_ovary_cs
NT_033777.3:1750812-1757709	6897	-37.0393	0.989912	0.5	0.537893	25	0.40965	0.2101	27	-0.132854	846.523	0.636509	2.47203	-2273.7	0.394705	0	-33	0	-33	26.5	119600	10	0.214003	0.888449	0.187865	piRNA	dmel	204807195	ok_ovary_cs
NT_033777.3:1820245-1829028	8783	-38.2912	0.987708	0.5	0.519553	24	0.4056	0.181	25	1.46864	4415.87	0.58135	2.509	-2431.03	0.0649827	0	-33	0	-33	24	191806	10	0.7765	0.534565	0.22911	piRNA	dmel	204807195	ok_ovary_cs
NT_033777.3:1851001-1874974	23973	-41.5319	0.975682	0.5	0.522773	26	0.36615	0.19135	27	0.146957	18424	0	-33	0	-33	0	-33	0	-33	25	6160443	10	1.70311	0.731511	0.412644	piRNA	dmel	204807195	ok_ovary_cs
NT_033777.3:2123790-2129012	5222	-42.3016	0.995074	0.783883	0.441223	24	0.261347	0.252802	26	1.78259	30399.5	0.530831	2.18012	-1050.97	-0.723101	0	-33	0	-33	24	310869	10	0.827081	0.74587	0.333724	piRNA	dmel	204807195	ok_ovary_cs
NT_033777.3:2197067-2219964	22897	-41.2137	0.986922	0.5	0.506884	25	0.35165	0.2389	26	1.39914	4007.07	0	-33	0	-33	0	-33	0	-33	25.5	115291	10	1.01712	1.12104	0.275676	piRNA	dmel	204807195	ok_ovary_cs
NT_033777.3:2331056-2336964	5908	-39.4205	0.98557	0.527343	0.500758	25	0.432157	0.240837	27	0.72466	39452.5	0.618822	2.44118	-1785.7	0.615913	0	-33	0	-33	25.5	1137362	10	0.741485	0.568373	0.422187	piRNA	dmel	204807195	ok_ovary_cs
NT_033777.3:2390001-2398019	8018	-41.4407	0.991891	0.563507	0.492627	25	0.460104	0.204046	25	0.184483	7198.91	0.631329	2.37957	-2375.41	0.769147	0	-33	0	-33	26	601660	10	0.999632	0.499177	0.399118	piRNA	dmel	204807195	ok_ovary_cs
NT_033777.3:2636268-2660633	24365	-40.1991	0.987626	0.5	0.501999	25	0.37985	0.23815	24	0.270804	1809.07	0	-33	0	-33	0	-33	0	-33	25.5	169682	10	0.513048	1.03565	0.277864	piRNA	dmel	204807195	ok_ovary_cs
NT_033777.3:2683275-2692801	9526	-41.0806	0.992348	0.5	0.478829	25	0.40425	0.27045	25	0.88278	12667.2	0.618518	2.72862	-2752.49	-0.308516	0	-33	0	-33	25.5	429529	10	0.570624	1.29322	0.392041	piRNA	dmel	204807195	ok_ovary_cs
NT_033777.3:2812394-2821014	8620	-39.7754	0.966502	0.87108	0.493397	26	0.641115	0.205662	24	0.779537	7982.1	0.630162	2.84523	-2313	-0.1849	0	-33	0	-33	24.5	43864.2	15	1.23964	1.84179	0.326147	piRNA	dmel	204807195	ok_ovary_cs
NT_033777.3:2880081-2904831	24750	-40.8379	0.985346	0.5	0.50342	25	0.39645	0.22575	27	2.06366	5467.75	0	-33	0	-33	0	-33	0	-33	26	48138.3	10	0.717275	0.416687	0.397933	piRNA	dmel	204807195	ok_ovary_cs
NT_033777.3:2999219-3020557	21338	-40.1313	0.994943	0.5	0.483947	25	0.37965	0.3257	27	-0.375142	777.943	0	-33	0	-33	0	-33	0	-33	26.5	722870	10	1.15535	1.19445	0.285475	piRNA	dmel	204807195	ok_ovary_cs
NT_033777.3:3283085-3291195	8110	-38.6852	0.984519	0.5	0.541906	25	0.39565	0.16475	27	-0.128553	4402.82	0.621455	2.77915	-2322.6	-1.13389	0	-33	0	-33	24.5	706787	10	0.399449	1.05519	0.210536	piRNA	dmel	204807195	ok_ovary_cs
NT_033777.3:3372175-3408179	36004	-38.5191	0.986705	0.5	0.517094	25	0.40845	0.2032	25	1.53343	617.165	0	-33	0	-33	0	-33	0	-33	24.5	37012.4	10	0.944809	0.960552	0.309576	piRNA	dmel	204807195	ok_ovary_cs
NT_033777.3:3612171-3620595	8424	-42.9702	0.993345	0.636213	0.452703	25	0.255821	0.360415	27	0.606185	10722.5	0.589269	2.52512	-2110.3	-0.688063	0	-33	0	-33	25.5	163704	10	0.273267	0.907164	0.31841	piRNA	dmel	204807195	ok_ovary_cs
NT_033777.3:3631854-3641855	10001	-42.1886	0.991364	0.5	0.436459	25	0.32915	0.349	26	0.343451	4604	0	-33	0	-33	0	-33	0	-33	26	51728.4	10	0.537596	0.523222	0.326884	piRNA	dmel	204807195	ok_ovary_cs
NT_033777.3:3707002-3715490	8488	-42.2697	0.98629	0.686214	0.471109	25	0.511349	0.282081	22	0.977955	50163.4	0.616871	2.59316	-2358.32	0.618985	0	-33	0	-33	25	243222	10	1.46157	1.52877	0.513027	piRNA	dmel	204807195	ok_ovary_cs
NT_033777.3:3753149-3775870	22721	-37.1008	0.989016	0.5	0.536126	25	0.25025	0.406	26	0.707965	713.257	0	-33	0	-33	0	-33	0	-33	25.5	76087.6	10	0.274184	0.731342	0.21415	piRNA	dmel	204807195	ok_ovary_cs
NT_033777.3:3873057-3920017	46960	-38.3336	0.990744	0.5	0.527705	25	0.342	0.25425	27	1.72427	195.968	0	-33	0	-33	0	-33	0	-33	25.5	13056.9	10	0.795851	0.858783	0.218291	piRNA	dmel	204807195	ok_ovary_cs
NT_033777.3:3977195-4000008	22813	-40.1781	0.991204	0.5	0.512802	25	0.2939	0.3575	25	0.787987	1501.72	0	-33	0	-33	0	-33	0	-33	25.5	106634	10	1.20219	0.713511	0.280833	piRNA	dmel	204807195	ok_ovary_cs
NT_033777.3:4014017-4062024	48007	-39.1299	0.990609	0.5	0.515072	25	0.3961	0.25075	26	1.39627	251.529	0	-33	0	-33	0	-33	0	-33	26.5	15551.4	10	0.249794	0.932271	0.219615	piRNA	dmel	204807195	ok_ovary_cs
NT_033777.3:4126773-4152023	25250	-43.0757	0.98674	0.609496	0.443652	25	0.310355	0.319924	27	0.725924	4345.01	0	-33	0	-33	0	-33	0	-33	25	161070	10	0.989838	1.09461	0.436826	piRNA	dmel	204807195	ok_ovary_cs
NT_033777.3:4174282-4198013	23731	-40.8715	0.955102	0.590965	0.432581	25	0.309453	0.228705	26	0.229803	41482	0	-33	0	-33	0	-33	0	-33	26	395495	10	0.809708	1.79079	0.457656	piRNA	dmel	204807195	ok_ovary_cs
NT_033777.3:4569951-4575834	5883	-21.2375	0.95757	0.518414	0.489675	26	0.370538	0.244193	21	-0.278859	20396.6	0.601054	2.69862	-1478.4	-0.656886	0	-33	0	-33	24.5	254958	17	-0.274502	1.64533	0.535977	piRNA	dmel	204807195	ok_ovary_cs
NT_033777.3:758156-763775	5619	-41.4518	0.986892	0.582174	0.462332	24	0.209932	0.452524	26	0.325638	11662.7	0.531767	2.62218	-1282.8	-0.494633	0	-33	0	-33	25.5	1623903	10	1.26538	1.40436	0.295287	piRNA	dmel	204807195	ok_ovary_cs
NT_033777.3:842233-910882	68649	-40.1161	0.98608	0.5	0.491173	25	0.33155	0.33605	26	-0.364434	181.895	0	-33	0	-33	0	-33	0	-33	26.5	47021.8	10	0.88942	1.01478	0.291934	piRNA	dmel	204807195	ok_ovary_cs
NT_033777.3:934003-964652	30649	-37.9039	0.987775	0.5	0.514457	25	0.27815	0.41495	26	0.44213	329.393	0	-33	0	-33	0	-33	0	-33	26.5	57211.8	10	0.355707	0.591545	0.210035	piRNA	dmel	204807195	ok_ovary_cs
NT_033778.4:1148914-1155092	6178	-35.6982	0.987385	0.5	0.547154	25	0.27665	0.31575	26	0.619209	441.607	0.673681	2.50273	-2271.8	-0.0832115	0	-33	0	-33	25.5	49719.8	10	0.603251	0.626975	0.191768	piRNA	dmel	204807195	ok_ovary_cs
NT_033778.4:1511065-1518004	6939	-36.7927	0.984503	0.52367	0.491645	25	0.389802	0.279177	27	1.72879	98576.1	0.606139	2.86956	-1777	-0.505291	0	-33	0	-33	25.5	632348	10	-0.174277	0.0350879	0.408056	piRNA	dmel	204807195	ok_ovary_cs
NT_033778.4:1564009-1569022	5013	-37.3325	0.986393	0.5	0.540946	25	0.4157	0.17715	26	0.70961	1180.52	0.636745	2.52605	-1759.1	-0.894427	0	-33	0	-33	26.5	119433	10	0.272113	1.00493	0.178608	piRNA	dmel	204807195	ok_ovary_cs
NT_033778.4:2001879-2008890	7011	-45.2824	0.992923	0.750244	0.41297	26	0.495761	0.349689	27	0.605955	25338.4	0.62245	2.30362	-1799.4	-0.879995	0	-33	0	-33	26	812558	10	1.42472	1.55958	0.426117	piRNA	dmel	204807195	ok_ovary_cs
NT_033778.4:2183215-2191998	8783	-41.3836	0.977221	0.596125	0.491663	25	0.40769	0.210492	26	0.0191984	12698	0.630764	2.80214	-2500	-0.488617	0	-33	0	-33	25.5	609087	10	0.0309427	0.567178	0.372628	piRNA	dmel	204807195	ok_ovary_cs
NT_033778.4:25249044-25286920	37876	-38.5257	0.987293	0.5	0.475559	24	0.41055	0.3112	25	0.538796	401.572	0	-33	0	-33	0	-33	0	-33	25.5	145387	10	0.256876	0.187581	0.193853	piRNA	dmel	204807195	ok_ovary_cs
NT_033778.4:2533018-2541851	8833	-39.0155	0.968434	0.578551	0.479006	25	0.452667	0.228299	25	1.74158	101628	0.610438	2.82361	-2502.5	-0.340196	0	-33	0	-33	26	253790	10	0.542428	1.38878	0.461539	piRNA	dmel	204807195	ok_ovary_cs
NT_033778.4:2666002-2690023	24021	-42.6205	0.987216	0.5	0.482426	25	0.40125	0.27965	26	0.0723647	3075.79	0	-33	0	-33	0	-33	0	-33	25.5	56098	10	0.408873	0.75647	0.394915	piRNA	dmel	204807195	ok_ovary_cs
NT_033778.4:2700106-2707964	7858	-40.45	0.964223	0.556483	0.452458	25	0.435782	0.32621	26	-0.147046	4850.24	0.615424	2.82801	-1970.48	1.21218	0	-33	0	-33	26	56852.8	13	0.916697	0.726713	0.257688	piRNA	dmel	204807195	ok_ovary_cs
NT_033778.4:2737121-2755019	17898	-39.2584	0.984434	0.5	0.526582	25	0.42945	0.2034	26	1.49752	3286.08	0	-33	0	-33	0	-33	0	-33	26	265020	10	-0.223543	-0.119919	0.210391	piRNA	dmel	204807195	ok_ovary_cs
NT_033778.4:2912393-2936963	24570	-38.7086	0.985035	0.5	0.531726	25	0.33285	0.297	26	0.819907	1628.61	0	-33	0	-33	0	-33	0	-33	25.5	69996.9	10	0.545926	0.252394	0.23992	piRNA	dmel	204807195	ok_ovary_cs
NT_033778.4:3065013-3130967	65954	-38.9058	0.987575	0.5	0.512626	24	0.31685	0.30085	27	0.569664	309.2	0	-33	0	-33	0	-33	0	-33	25.5	36261.1	10	0.83052	1.04314	0.264074	piRNA	dmel	204807195	ok_ovary_cs
NT_033778.4:3180002-3190903	10901	-39.1188	0.984977	0.549572	0.521656	26	0.423645	0.173735	25	0.959909	54071.6	0	-33	0	-33	0	-33	0	-33	24.5	466268	10	2.02684	0.953298	0.408669	piRNA	dmel	204807195	ok_ovary_cs
NT_033778.4:3203053-3211304	8251	-39.6244	0.984145	0.5	0.524169	26	0.3916	0.2063	25	0.820337	5064.63	0.615441	2.2073	-2341.2	1.50961	0	-33	0	-33	25.5	1666972	10	1.00284	1.01053	0.257792	piRNA	dmel	204807195	ok_ovary_cs
NT_033778.4:3340028-3348986	8958	-42.5857	0.991966	0.5	0.469149	25	0.40855	0.2879	26	0.134798	11581	0.629605	2.23111	-2622.1	0.97482	0	-33	0	-33	26.5	308840	10	1.40132	1.42336	0.461812	piRNA	dmel	204807195	ok_ovary_cs
NT_033778.4:3380005-3400745	20740	-40.3421	0.988189	0.5	0.508077	25	0.43345	0.2892	26	0.572068	2161.97	0	-33	0	-33	0	-33	0	-33	26.5	330706	10	0.208639	0.785676	0.225121	piRNA	dmel	204807195	ok_ovary_cs
NT_033778.4:3450752-3493985	43233	-39.9915	0.987414	0.5	0.505682	25	0.384	0.23275	25	0.947464	1201.77	0	-33	0	-33	0	-33	0	-33	25.5	64895.4	10	0.956167	1.46313	0.365231	piRNA	dmel	204807195	ok_ovary_cs
NT_033778.4:3515008-3523582	8574	-44.2448	0.991973	0.611658	0.464877	26	0.388158	0.253777	25	-0.193926	22875.1	0.595521	2.786	-2034	0.858302	0	-33	0	-33	25.5	286366	22	1.85498	1.70558	0.490131	piRNA	dmel	204807195	ok_ovary_cs
NT_033778.4:4223807-4229899	6092	-38.2426	0.992614	0.5	0.516661	25	0.32025	0.31135	25	0.038741	806.558	0.587984	1.86381	-1719.14	1.53762	0	-33	0	-33	25.5	173787	10	0.955793	0.994378	0.172558	piRNA	dmel	204807195	ok_ovary_cs
NT_033778.4:4241065-4255889	14824	-37.6616	0.988599	0.5	0.527606	25	0.2956	0.3001	26	0.767468	994.598	0	-33	0	-33	0	-33	0	-33	26	107098	10	1.35177	1.00425	0.228894	piRNA	dmel	204807195	ok_ovary_cs
NT_033778.4:4289007-4313794	24787	-40.5809	0.981375	0.5	0.476637	25	0.42305	0.24355	26	0.734295	904.006	0	-33	0	-33	0	-33	0	-33	25.5	12040.2	10	0.557175	0.969212	0.362755	piRNA	dmel	204807195	ok_ovary_cs
NT_033778.4:4520014-4544004	23990	-36.8142	0.987883	0.5	0.535767	25	0.40345	0.19855	26	0.275817	554.171	0	-33	0	-33	0	-33	0	-33	25.5	51615.2	10	0.0104163	0.735349	0.207203	piRNA	dmel	204807195	ok_ovary_cs
NT_033778.4:463021-470036	7015	-37.9286	0.983594	0.5	0.538851	25	0.1492	0.443	26	0.0973167	5387.33	0.599002	2.48656	-2133.9	1.27208	0	-33	0	-33	25	202845	10	0.0888532	0.137341	0.145554	piRNA	dmel	204807195	ok_ovary_cs
NT_033778.4:4828027-4894026	65999	-37.4486	0.987676	0.5	0.534476	24	0.31805	0.2589	26	0.014095	59.1061	0	-33	0	-33	0	-33	0	-33	25.5	8424.9	10	0.694011	1.1358	0.237749	piRNA	dmel	204807195	ok_ovary_cs
NT_033778.4:4917012-4926024	9012	-38.2916	0.982747	0.5	0.535978	24	0.28865	0.30785	25	0.700674	2873.93	0.596094	2.57289	-2615.6	-0.0363156	0	-33	0	-33	26.5	158386	10	0.561374	0.779417	0.274824	piRNA	dmel	204807195	ok_ovary_cs
NT_033778.4:4947379-4968029	20650	-39.9858	0.993693	0.5	0.515385	25	0.40945	0.1901	25	2.24513	9929.22	0	-33	0	-33	0	-33	0	-33	25.5	481474	10	0.543735	0.682331	0.258476	piRNA	dmel	204807195	ok_ovary_cs
NT_033778.4:4978049-5008974	30925	-37.3901	0.98871	0.5	0.54144	25	0.35605	0.2135	26	1.20707	808.663	0	-33	0	-33	0	-33	0	-33	26.5	73764.1	10	0.524783	1.13459	0.204041	piRNA	dmel	204807195	ok_ovary_cs
NT_033778.4:5048210-5057986	9776	-42.3051	0.985826	0.708065	0.491739	25	0.537138	0.217659	26	0.47428	9323.47	0.648322	2.55452	-3190.5	0.253086	0	-33	0	-33	25.5	249897	10	1.16782	0.775332	0.442199	piRNA	dmel	204807195	ok_ovary_cs
NT_033778.4:5100009-5114001	13992	-39.9637	0.989563	0.5	0.481035	24	0.41995	0.2078	27	1.06968	38537.1	0	-33	0	-33	0	-33	0	-33	25	1886853	10	0.331833	0.72864	0.375645	piRNA	dmel	204807195	ok_ovary_cs
NT_033778.4:5329002-5339018	10016	-38.6896	0.986363	0.5	0.519935	25	0.24375	0.40865	27	-0.401567	2202.76	0	-33	0	-33	0	-33	0	-33	25.5	476710	10	1.77888	0.788974	0.247179	piRNA	dmel	204807195	ok_ovary_cs
NT_033778.4:5371047-5379653	8606	-40.2881	0.987502	0.699447	0.467715	25	0.526824	0.178709	27	1.45195	41913.4	0.642807	2.50187	-2379.8	0.0714742	0	-33	0	-33	25.5	514233	10	0.380395	1.90197	0.301848	piRNA	dmel	204807195	ok_ovary_cs
NT_033778.4:5610085-5617993	7908	-36.8758	0.979548	0.684932	0.501767	26	0.220069	0.396849	27	-0.557465	13312.5	0.604198	2.52564	-2087.3	-0.491473	0	-33	0	-33	25.5	7438313	10	0.0126974	0.911394	0.244062	piRNA	dmel	204807195	ok_ovary_cs
NT_033778.4:8457402-8463650	6248	-30.1819	0.98753	0.608023	0.46289	24	0.463897	0.292693	26	0.0846414	109599	0.630282	2.36506	-1991	0.514344	0	-33	0	-33	25.5	1109885	10	1.43554	1.48061	0.338825	piRNA	dmel	204807195	ok_ovary_cs
NT_033779.5:20100590-20228025	127435	-40.1071	0.986928	0.5	0.488857	25	0.41595	0.2348	26	1.37933	115.828	0	-33	0	-33	0	-33	0	-33	24.5	5572.14	10	1.01674	0.597075	0.279459	piRNA	dmel	204807195	ok_ovary_cs
NT_033779.5:22223009-22229835	6826	-37.4991	0.966892	0.583912	0.516624	25	0.297852	0.260862	26	0.826177	68486.5	0.60797	2.6779	-1934.9	2.0616	0	-33	0	-33	24.5	169116	10	0.626963	1.32438	0.569859	piRNA	dmel	204807195	ok_ovary_cs
NT_033779.5:22256072-22269910	13838	-38.8372	0.978786	0.5	0.540653	25	0.39065	0.1502	26	1.2126	5611.4	0	-33	0	-33	0	-33	0	-33	25	160665	10	1.09328	0.705455	0.221847	piRNA	dmel	204807195	ok_ovary_cs
NT_033779.5:22368316-22410762	42446	-39.1073	0.987382	0.5	0.518501	25	0.36815	0.2517	24	0.523767	207.173	0	-33	0	-33	0	-33	0	-33	24.5	16409.6	10	0.751535	0.834412	0.249451	piRNA	dmel	204807195	ok_ovary_cs
NT_033779.5:22504064-22511000	6936	-41.2033	0.98518	0.531096	0.466419	26	0.364066	0.278985	25	1.8095	39144.6	0.600923	2.41044	-1734.8	0.199205	0	-33	0	-33	26.5	771911	10	0.790018	0.0507751	0.354497	piRNA	dmel	204807195	ok_ovary_cs
NT_033779.5:22595472-22602067	6595	-39.9373	0.985378	0.559409	0.49841	25	0.419109	0.221246	26	1.19278	36418	0.629568	2.67558	-2168.5	-0.136083	0	-33	0	-33	25.5	1306985	10	1.10049	1.09415	0.462368	piRNA	dmel	204807195	ok_ovary_cs
NT_033779.5:22622045-22638702	16657	-37.2328	0.987937	0.5	0.540814	26	0.24465	0.437	26	0.754589	882.585	0	-33	0	-33	0	-33	0	-33	25.5	68353.9	10	-0.197177	0.428847	0.183988	piRNA	dmel	204807195	ok_ovary_cs
NT_033779.5:23067018-23095581	28563	-39.1625	0.982203	0.5	0.515675	24	0.3207	0.3069	25	0.101658	2030.96	0	-33	0	-33	0	-33	0	-33	25.5	70731.6	10	0.566192	1.12112	0.260983	piRNA	dmel	204807195	ok_ovary_cs
NT_033779.5:23178032-23197993	19961	-37.4318	0.990844	0.5	0.529428	25	0.4045	0.18895	25	0.517082	1175.55	0	-33	0	-33	0	-33	0	-33	25.5	100814	10	0.995165	0.729595	0.249518	piRNA	dmel	204807195	ok_ovary_cs
NT_033779.5:23213949-23244778	30829	-37.4843	0.990585	0.5	0.53346	25	0.3741	0.24595	26	0.660651	112.19	0	-33	0	-33	0	-33	0	-33	25.5	14495.6	10	0.294124	0.841705	0.195973	piRNA	dmel	204807195	ok_ovary_cs
NT_033779.5:23295319-23313023	17704	-41.1658	0.990088	0.5	0.459564	25	0.389	0.32765	25	-0.0396644	7306.84	0	-33	0	-33	0	-33	0	-33	24.5	396037	10	0.678347	0.710687	0.311945	piRNA	dmel	204807195	ok_ovary_cs
NT_033779.5:23325041-23351995	26954	-40.5869	0.9828	0.5	0.464765	24	0.33395	0.34155	26	0.836567	2300.77	0	-33	0	-33	0	-33	0	-33	25	46284.4	10	0.666294	0.194472	0.316058	piRNA	dmel	204807195	ok_ovary_cs
NT_033779.5:23482202-23509781	27579	-39.3673	0.992833	0.5	0.497527	25	0.3556	0.2654	26	0.289583	256.352	0	-33	0	-33	0	-33	0	-33	25.5	43406.2	10	1.11578	0.886993	0.218664	piRNA	dmel	204807195	ok_ovary_cs
NT_033779.5:5101-10985	5884	-31.7163	0.954653	0.718783	0.437215	25	0.368773	0.288425	25	0.763514	259063	0.594494	2.6296	-1345.59	-0.764093	0	-33	0	-33	26	2182319	10	0.654461	1.71071	0.263409	piRNA	dmel	204807195	ok_ovary_cs
NT_037436.4:19799-76953	57154	-37.6056	0.986909	0.629961	0.399074	26	0.363557	0.465791	26	-0.118715	31800.3	0	-33	0	-33	0	-33	0	-33	26	1922295	10	1.03644	1.66349	0.30127	piRNA	dmel	204807195	ok_ovary_cs
NT_037436.4:19859483-19871983	12500	-44.0949	0.994735	0.577067	0.435034	26	0.37394	0.358474	26	1.62542	24949.5	0	-33	0	-33	0	-33	0	-33	25.5	660569	10	0.592867	-0.0308442	0.417238	piRNA	dmel	204807195	ok_ovary_cs
NT_037436.4:23100075-23124822	24747	-37.7657	0.986873	0.5	0.539521	25	0.31265	0.29435	26	0.476169	284.939	0	-33	0	-33	0	-33	0	-33	25.5	28626	10	0.443174	0.595738	0.210482	piRNA	dmel	204807195	ok_ovary_cs
NT_037436.4:23177021-23182548	5527	-42.3136	0.975974	0.647471	0.450672	24	0.397078	0.298805	27	-0.424849	110346	0.626741	2.94017	-1435.5	-1.06391	0	-33	0	-33	25.5	386334	22	0.28571	1.29818	0.526379	piRNA	dmel	204807195	ok_ovary_cs
NT_037436.4:23278246-23322007	43761	-38.4684	0.989557	0.5	0.533828	25	0.37805	0.21585	26	1.5178	314.278	0	-33	0	-33	0	-33	0	-33	25.5	20740	10	0.678644	0.780011	0.244306	piRNA	dmel	204807195	ok_ovary_cs
NT_037436.4:23456050-23487016	30966	-38.4486	0.988277	0.5	0.525085	25	0.37255	0.2403	26	0.130482	469.46	0	-33	0	-33	0	-33	0	-33	26.5	28082.2	10	0.844185	0.639701	0.244523	piRNA	dmel	204807195	ok_ovary_cs
NT_037436.4:23634039-23642959	8920	-42.8615	0.996182	0.5	0.463263	25	0.37675	0.3185	27	1.0513	14234.9	0.601121	2.25801	-2227.3	-0.879122	0	-33	0	-33	25	1198972	10	1.48048	0.974815	0.328615	piRNA	dmel	204807195	ok_ovary_cs
NT_037436.4:23751029-23756667	5638	-38.7991	0.989048	0.676478	0.45003	25	0.316567	0.286637	27	0.37998	44461	0.597375	2.91729	-1460.5	-1.37389	0	-33	0	-33	25.5	272230	10	1.68895	1.36852	0.480502	piRNA	dmel	204807195	ok_ovary_cs
NT_037436.4:24038241-24059030	20789	-39.3979	0.983067	0.5	0.531366	25	0.2886	0.30475	25	0.762207	2939.92	0	-33	0	-33	0	-33	0	-33	25.5	487351	10	0.67722	1.02531	0.352526	piRNA	dmel	204807195	ok_ovary_cs
NT_037436.4:24102164-24132467	30303	-40.9387	0.991768	0.5	0.491875	25	0.3978	0.2826	25	1.62678	530.869	0	-33	0	-33	0	-33	0	-33	26.5	35011.2	10	1.16056	1.00722	0.313091	piRNA	dmel	204807195	ok_ovary_cs
NT_037436.4:24228459-24235498	7039	-37.176	0.981374	0.581223	0.462392	26	0.409542	0.234364	27	-0.397868	133203	0.600085	2.65279	-1485.7	-0.213201	0	-33	0	-33	26	180495	25	1.02982	1.38056	0.474185	piRNA	dmel	204807195	ok_ovary_cs
NT_037436.4:24253435-24264943	11508	-39.6369	0.986013	0.5	0.478372	25	0.4039	0.25475	26	0.653482	7328.92	0	-33	0	-33	0	-33	0	-33	26	433315	10	0.377217	0.426414	0.392438	piRNA	dmel	204807195	ok_ovary_cs
NT_037436.4:24283116-24288795	5679	-37.7074	0.988389	0.559951	0.474349	26	0.462711	0.207252	26	0.0526605	56139.3	0.60891	2.36351	-1432.1	0.768442	0	-33	0	-33	26	490214	10	0.372791	0.852731	0.406469	piRNA	dmel	204807195	ok_ovary_cs
NT_037436.4:24302053-24329393	27340	-40.5278	0.983022	0.5	0.48915	26	0.2899	0.3393	27	0.486624	3152.49	0	-33	0	-33	0	-33	0	-33	25.5	98360.4	10	1.13831	0.772552	0.372094	piRNA	dmel	204807195	ok_ovary_cs
NT_037436.4:24372934-24379023	6089	-42.1831	0.997467	0.760861	0.468629	24	0.60207	0.184889	25	0.469381	33108.7	0.635572	2.48268	-1558.5	0.188948	0	-33	0	-33	25.5	3051037	10	0.568873	1.62454	0.339331	piRNA	dmel	204807195	ok_ovary_cs
NT_037436.4:24491318-24519771	28453	-40.8593	0.987129	0.5	0.495485	25	0.41125	0.248	26	0.913239	1128.23	0	-33	0	-33	0	-33	0	-33	25.5	67137.9	10	1.03702	1.69435	0.284272	piRNA	dmel	204807195	ok_ovary_cs
NT_037436.4:24537021-24542619	5598	-12.1747	0.94303	0.725955	0.430488	23	0.552042	0.246377	22	0.892798	22397.9	0.612362	2.69342	-1294.9	-0.333333	0	-33	0	-33	24	296443	10	2.35047	1.71051	0.56917	piRNA	dmel	204807195	ok_ovary_cs
NT_037436.4:24554420-24578506	24086	-40.899	0.976676	0.5	0.490111	25	0.2708	0.3337	25	0.97803	1969.74	0	-33	0	-33	0	-33	0	-33	25.5	92434.7	10	1.19948	1.68185	0.345067	piRNA	dmel	204807195	ok_ovary_cs
NT_037436.4:24681452-24689399	7947	-41.9931	0.989853	0.642343	0.492154	25	0.304407	0.27017	25	0.48011	23667.3	0.608532	2.78495	-1962.1	-0.295785	0	-33	0	-33	26	168743	10	0.947803	1.08607	0.504466	piRNA	dmel	204807195	ok_ovary_cs
NT_037436.4:24700008-24724008	24000	-41.1367	0.987795	0.5	0.47907	25	0.3692	0.32025	27	0.690511	9022.52	0	-33	0	-33	0	-33	0	-33	26	243900	10	1.39499	1.35236	0.466942	piRNA	dmel	204807195	ok_ovary_cs
NT_037436.4:24751004-24846643	95639	-38.3157	0.987934	0.5	0.508753	25	0.3391	0.2758	25	0.341318	44.8986	0	-33	0	-33	0	-33	0	-33	26	4133.77	10	1.06884	1.08974	0.230049	piRNA	dmel	204807195	ok_ovary_cs
NT_037436.4:24871096-24922022	50926	-39.3028	0.98911	0.5	0.526608	25	0.3967	0.19865	26	1.52023	497.845	0	-33	0	-33	0	-33	0	-33	25.5	28308.3	10	1.13662	0.848744	0.266788	piRNA	dmel	204807195	ok_ovary_cs
NT_037436.4:25003017-25027422	24405	-39.9374	0.988499	0.5	0.504906	24	0.28615	0.4035	25	0.65381	1369.72	0	-33	0	-33	0	-33	0	-33	25.5	84384	10	1.12712	0.520754	0.23577	piRNA	dmel	204807195	ok_ovary_cs
NT_037436.4:25042292-25075384	33092	-37.6518	0.9902	0.5	0.533622	25	0.33775	0.2608	26	1.10138	102.539	0	-33	0	-33	0	-33	0	-33	25.5	13314	10	0.81764	1.29679	0.193347	piRNA	dmel	204807195	ok_ovary_cs
NT_037436.4:25113003-25133675	20672	-36.5477	0.98705	0.5	0.539408	24	0.30955	0.2437	26	0.533279	539.665	0	-33	0	-33	0	-33	0	-33	25.5	60760.2	10	0.68384	1.50513	0.191199	piRNA	dmel	204807195	ok_ovary_cs
NT_037436.4:25190001-25199714	9713	-38.5225	0.990306	0.5	0.532577	25	0.3851	0.2065	26	0.918728	2442.86	0.647998	2.24173	-2871.2	-0.995037	0	-33	0	-33	25.5	178920	10	0.86172	0.803666	0.17514	piRNA	dmel	204807195	ok_ovary_cs
NT_037436.4:25229669-25238017	8348	-40.7233	0.981015	0.55684	0.516237	25	0.268049	0.312451	25	0.984434	42637.3	0.60781	2.3768	-2341.8	-1.27273	0	-33	0	-33	25	1636701	10	0.84223	1.66171	0.388358	piRNA	dmel	204807195	ok_ovary_cs
NT_037436.4:25344010-25354027	10017	-40.8832	0.985889	0.602809	0.501245	26	0.275363	0.299717	26	0.634213	45581.7	0	-33	0	-33	0	-33	0	-33	26.5	885010	10	1.25537	1.27888	0.441262	piRNA	dmel	204807195	ok_ovary_cs
NT_037436.4:25416161-25426691	10530	-42.8413	0.991637	0.585069	0.48691	24	0.308331	0.219752	24	-0.310938	17454.3	0	-33	0	-33	0	-33	0	-33	24.5	4944666	10	1.90898	1.43353	0.429022	piRNA	dmel	204807195	ok_ovary_cs
NT_037436.4:25451907-25464635	12728	-41.9628	0.987112	0.5	0.471511	25	0.43395	0.29715	26	0.365132	6715.86	0	-33	0	-33	0	-33	0	-33	25.5	176895	10	0.222751	0.505551	0.369983	piRNA	dmel	204807195	ok_ovary_cs
NT_037436.4:25490446-25498959	8513	-40.8796	0.979863	0.540879	0.50015	25	0.439129	0.17464	27	2.18355	201011	0.611535	2.89766	-2345.45	1.80713	0	-33	0	-33	25.5	368884	10	1.04991	0.361673	0.458732	piRNA	dmel	204807195	ok_ovary_cs
NT_037436.4:25516072-25527968	11896	-37.1355	0.987435	0.5	0.539643	25	0.41125	0.18895	26	0.168712	622.435	0	-33	0	-33	0	-33	0	-33	26.5	74763.1	10	0.251244	0.87299	0.174688	piRNA	dmel	204807195	ok_ovary_cs
NT_037436.4:25608001-25618001	10000	-38.7531	0.992537	0.5	0.489237	24	0.4342	0.2051	27	-0.337239	678.229	0.6294	2.41412	-2869.5	-1.43105	0	-33	0	-33	23	105824	10	0.750446	0.589134	0.210652	piRNA	dmel	204807195	ok_ovary_cs
NT_037436.4:25661241-25669028	7787	-38.3648	0.991939	0.5	0.518624	26	0.4322	0.20705	24	-0.142126	3671.87	0.602029	2.2812	-2139.64	-0.882258	0	-33	0	-33	26.5	1516588	10	0.395262	1.13669	0.215908	piRNA	dmel	204807195	ok_ovary_cs
NT_037436.4:25690001-25698855	8854	-40.5643	0.981596	0.5	0.498782	24	0.3835	0.27655	24	1.63364	5961.41	0.633612	2.36621	-2700.35	0.111049	0	-33	0	-33	25.5	221765	7	0.649323	1.53176	0.306489	piRNA	dmel	204807195	ok_ovary_cs
NT_037436.4:25790041-25806948	16907	-39.4935	0.982248	0.5	0.52135	25	0.25435	0.3138	26	1.05693	3990.98	0	-33	0	-33	0	-33	0	-33	24	412112	10	0.581308	0.93608	0.377885	piRNA	dmel	204807195	ok_ovary_cs
NT_037436.4:26017541-26034461	16920	-39.9475	0.983872	0.5	0.519642	25	0.3712	0.21345	26	1.23052	4444.44	0	-33	0	-33	0	-33	0	-33	24	191284	10	0.824966	0.662982	0.38198	piRNA	dmel	204807195	ok_ovary_cs
NT_037436.4:26055543-26070366	14823	-37.617	0.990318	0.5	0.526584	25	0.4137	0.2049	27	0.424534	465.644	0	-33	0	-33	0	-33	0	-33	25.5	53808.7	10	0.311472	1.00913	0.202385	piRNA	dmel	204807195	ok_ovary_cs
NT_037436.4:26123660-26136020	12360	-39.08	0.987379	0.5	0.511082	25	0.40285	0.17545	26	0.473698	2285.58	0	-33	0	-33	0	-33	0	-33	24.5	147017	14	0.668014	0.968746	0.232227	piRNA	dmel	204807195	ok_ovary_cs
NT_037436.4:26149059-26155694	6635	-42.4598	0.995507	0.701951	0.499179	25	0.254317	0.247648	25	0.415616	24165.6	0.610399	2.23283	-1950.7	-1.43422	0	-33	0	-33	26.5	90226.5	20	0.285147	0.293113	0.352388	piRNA	dmel	204807195	ok_ovary_cs
NT_037436.4:26465466-26471760	6294	-43.4827	0.980596	0.5	0.475852	25	0.4226	0.23375	25	0.858155	14690.8	0.594534	2.36521	-1539.9	0.982725	0	-33	0	-33	24.5	1110583	10	0.821326	0.718696	0.301162	piRNA	dmel	204807195	ok_ovary_cs
NT_037436.4:26565875-26571497	5622	-37.288	0.981571	0.509842	0.481189	25	0.397996	0.233268	27	-0.230108	120437	0.564568	2.60411	-1298	1.31028	0	-33	0	-33	24.5	2304850	10	0.648868	0.144583	0.339477	piRNA	dmel	204807195	ok_ovary_cs
NT_037436.4:26641084-26647593	6509	-30.4339	0.976348	0.641879	0.459098	25	0.541205	0.357469	25	1.05066	28484.5	0.639115	1.81963	-1947.6	-0.7698	0	-33	0	-33	26.5	88497.5	11	-0.656786	-0.301448	0.479235	piRNA	dmel	204807195	ok_ovary_cs
NT_037436.4:26694440-26779351	84911	-41.4264	0.987966	0.5	0.498044	24	0.3328	0.31205	27	0.686885	103.664	0	-33	0	-33	0	-33	0	-33	25.5	10674.2	10	0.544642	0.93022	0.338998	piRNA	dmel	204807195	ok_ovary_cs
NT_037436.4:26793334-26878818	85484	-40.7521	0.991528	0.5	0.482998	25	0.40885	0.24515	25	1.49846	275.464	0	-33	0	-33	0	-33	0	-33	25.5	11561.9	10	0.901553	0.906617	0.277842	piRNA	dmel	204807195	ok_ovary_cs
NT_037436.4:27006535-27012992	6457	-40.0274	0.988681	0.5	0.437112	25	0.4011	0.36405	25	0.462303	2726.13	0.55134	2.75262	-1270.97	0.684672	0	-33	0	-33	25.5	195122	10	1.61151	1.52613	0.300723	piRNA	dmel	204807195	ok_ovary_cs
NT_037436.4:27253180-27280919	27739	-42.1882	0.987345	0.5	0.450164	25	0.4132	0.27775	25	0.848507	3137.89	0	-33	0	-33	0	-33	0	-33	26.5	67419.8	10	1.05666	1.41747	0.397472	piRNA	dmel	204807195	ok_ovary_cs
NT_037436.4:27905031-27915982	10951	-42.1973	0.988297	0.696573	0.462903	26	0.247771	0.407774	26	-0.109167	9224.78	0	-33	0	-33	0	-33	0	-33	26.5	3148764	10	0.312343	0.322544	0.416727	piRNA	dmel	204807195	ok_ovary_cs
10:3269707-3270125	418	-27.5796	0.901791	0.724218	0.355695	30	0.590382	0.393975	29	0.107024	417729	0.54067	2.64783	-106.4	1.46667	0	-33	0	-33	31	853998	24	1.23963	1.80318	0.366744	piRNA	mouse	3849069296	(SRR13848060-SRR13848062, SRR24821465,SRR24821466,SRR24821469,SRR24821470)
10:62499521-62500367	846	-45.8988	0.853417	0.949758	0.440228	30	0.873777	0.263748	27	-0.454811	6471.78	0.598109	2.46759	-268	0	0	-33	0	-33	29	461855	10	0.705411	1.11386	0.183678	piRNA	mouse	3849069296	(SRR13848060-SRR13848062, SRR24821465,SRR24821466,SRR24821469,SRR24821470)
10:75675029-75675918	889	-31.1458	0.932728	0.987217	0.424001	30	0.898967	0.32805	30	0.110442	1124.86	0.573678	2.42191	-266.7	0.383573	0	-33	0	-33	30	114327	10	1.64533	1.65362	0.238675	piRNA	mouse	3849069296	(SRR13848060-SRR13848062, SRR24821465,SRR24821466,SRR24821469,SRR24821470)
10:75680924-75699427	18503	-45.3004	0.868218	0.654365	0.454946	29	0.715417	0.298194	20	-0.0894949	152.583	0	-33	0	-33	0	-33	0	-33	27	30885.4	10	0.780756	0.0323333	0.145746	piRNA	mouse	3849069296	(SRR13848060-SRR13848062, SRR24821465,SRR24821466,SRR24821469,SRR24821470)
10:75693209-75694003	794	-39.2233	0.918775	0.993345	0.507656	29	0.827655	0.239992	31	-0.271727	72.0202	0.63728	2.63991	-311.7	-0.65157	0	-33	0	-33	30.5	91249.6	10	2.13896	1.64533	0.099892	piRNA	mouse	3849069296	(SRR13848060-SRR13848062, SRR24821465,SRR24821466,SRR24821469,SRR24821470)
10:75695919-75696631	712	-35.8767	0.911348	0.930319	0.428042	29	0.908084	0.286445	30	-0.336754	5908.42	0.654494	1.82191	-251.8	0.125988	0	-33	0	-33	30.5	1314043	10	1.5973	2.38451	0.138901	piRNA	mouse	3849069296	(SRR13848060-SRR13848062, SRR24821465,SRR24821466,SRR24821469,SRR24821470)
10:85586174-85587184	1010	-48.8988	0.893545	0.922254	0.421137	29	0.897999	0.174122	20	-0.466977	520.78	0.556436	2.50804	-290.5	1.40312	0	-33	0	-33	31	63624.1	10	0.501474	2.89735	0.0855604	piRNA	mouse	3849069296	(SRR13848060-SRR13848062, SRR24821465,SRR24821466,SRR24821469,SRR24821470)
10:85587197-85587938	741	-43.6001	0.879023	0.993838	0.388564	31	0.949116	0.321904	20	-0.55136	50.6765	0.634278	2.29627	-200.3	0.429463	0	-33	0	-33	30.5	50423.2	10	0.16836	0.441715	0.164547	piRNA	mouse	3849069296	(SRR13848060-SRR13848062, SRR24821465,SRR24821466,SRR24821469,SRR24821470)
10:85592947-85594897	1950	-49.4603	0.88422	0.746046	0.390091	30	0.664951	0.272008	20	0.060799	22883.5	0.58359	2.61447	-499.9	0.121551	0	-33	0	-33	30.5	578082	10	0.317704	0.586279	0.345957	piRNA	mouse	3849069296	(SRR13848060-SRR13848062, SRR24821465,SRR24821466,SRR24821469,SRR24821470)
10:85603014-85603893	879	-47.0607	0.904338	0.883705	0.411046	29	0.87796	0.49514	20	-0.534573	773.965	0.609784	1.98651	-228.7	1.34031	0	-33	0	-33	28.5	8675193	10	0.513821	2.22479	0.130984	piRNA	mouse	3849069296	(SRR13848060-SRR13848062, SRR24821465,SRR24821466,SRR24821469,SRR24821470)
10:86452838-86455634	2796	-46.7768	0.877391	0.785299	0.433737	29	0.816083	0.21423	20	0.047763	684.225	0.615165	1.82364	-908.4	1.49414	0	-33	0	-33	31	44175.9	10	0.249459	0.47854	0.11866	piRNA	mouse	3849069296	(SRR13848060-SRR13848062, SRR24821465,SRR24821466,SRR24821469,SRR24821470)
11:103327609-103328173	564	-29.7496	0.94527	0.991965	0.472445	29	0.853586	0.128559	20	-0.274111	3043.72	0.592199	2.25192	-166.3	1.6234	0	-33	0	-33	31	507471	10	3.19256	1.64533	0.168696	piRNA	mouse	3849069296	(SRR13848060-SRR13848062, SRR24821465,SRR24821466,SRR24821469,SRR24821470)
12:98379185-98395510	16325	-50.2056	0.899257	0.5	0.419907	30	0.55165	0.24655	20	0	3.69602	0	-33	0	-33	0	-33	0	-33	31.5	924.006	16	0.547938	0.416213	0.158046	piRNA	mouse	3849069296	(SRR13848060-SRR13848062, SRR24821465,SRR24821466,SRR24821469,SRR24821470)
12:98386419-98387267	848	-49.8702	0.882084	0.911328	0.420343	31	0.876333	0.25262	20	0.0366864	2692.11	0.599057	2.2521	-248.4	0.105409	0	-33	0	-33	29.5	134221	10	0.603875	0.464364	0.131	piRNA	mouse	3849069296	(SRR13848060-SRR13848062, SRR24821465,SRR24821466,SRR24821469,SRR24821470)
12:98387566-98388482	916	-38.3511	0.857853	0.955658	0.448379	30	0.908735	0.174216	31	-0.481946	1826.25	0.582969	2.70681	-260.8	1.47573	0	-33	0	-33	31	328202	10	0.350412	3.39405	0.197756	piRNA	mouse	3849069296	(SRR13848060-SRR13848062, SRR24821465,SRR24821466,SRR24821469,SRR24821470)
12:98391649-98392418	769	-37.2842	0.943701	0.983091	0.446435	26	0.954483	0.129473	30	0.159109	1057.6	0.577373	2.38055	-228.3	-33	0	-33	0	-33	30	26880.5	10	2.21084	2.90856	0.146477	piRNA	mouse	3849069296	(SRR13848060-SRR13848062, SRR24821465,SRR24821466,SRR24821469,SRR24821470)
12:98409903-98410581	678	-29.8232	0.918446	0.994043	0.40122	30	0.92256	0.190622	20	-0.666667	0	0.60472	1.88509	-187.3	1.60806	0	-33	0	-33	31	681228	10	-0.483955	-0.255673	0.160837	piRNA	mouse	3849069296	(SRR13848060-SRR13848062, SRR24821465,SRR24821466,SRR24821469,SRR24821470)
13:50520670-50527226	6556	-51.9442	0.838177	0.5	0.419543	30	0.6011	0.1814	20	2.39382	4366.27	0.621721	2.09122	-1876.2	0.759121	0	-33	0	-33	31.5	114082	10	1.23877	1.50549	0.168342	piRNA	mouse	3849069296	(SRR13848060-SRR13848062, SRR24821465,SRR24821466,SRR24821469,SRR24821470)
13:50522649-50524334	1685	-52.9485	0.834966	0.5	0.420633	30	0.626	0.14075	20	2.27904	11827.8	0.626706	2.06703	-520.7	0.846389	0	-33	0	-33	31.5	439710	12	1.24282	1.562	0.132034	piRNA	mouse	3849069296	(SRR13848060-SRR13848062, SRR24821465,SRR24821466,SRR24821469,SRR24821470)
13:50665073-50671668	6595	-52.3008	0.834788	0.5	0.419648	30	0.2197	0.43735	20	2.32653	3639.76	0.598029	1.99332	-1849.08	2.18229	0	-33	0	-33	31.5	113822	10	0.903141	0.547264	0.165402	piRNA	mouse	3849069296	(SRR13848060-SRR13848062, SRR24821465,SRR24821466,SRR24821469,SRR24821470)
13:50765536-50766475	939	-36.0563	0.858846	0.608105	0.496437	30	0.551102	0.290804	20	0.904107	82832.3	0.649627	2.38995	-329.3	0.677553	0	-33	0	-33	30	610777	10	0.633109	0.277793	0.397016	piRNA	mouse	3849069296	(SRR13848060-SRR13848062, SRR24821465,SRR24821466,SRR24821469,SRR24821470)
13:53552044-53552794	750	-32.8828	0.889096	0.927743	0.441347	30	0.847862	0.219423	31	2.46163	179649	0.650667	2.10492	-234.2	1.31943	0	-33	0	-33	31	1481770	10	0.641384	2.0081	0.301293	piRNA	mouse	3849069296	(SRR13848060-SRR13848062, SRR24821465,SRR24821466,SRR24821469,SRR24821470)
14:24131851-24148589	16738	-45.932	0.855887	0.769112	0.4301	30	0.732041	0.286187	20	-0.231093	36.1846	0	-33	0	-33	0	-33	0	-33	30	2145.23	10	1.13419	1.65458	0.116251	piRNA	mouse	3849069296	(SRR13848060-SRR13848062, SRR24821465,SRR24821466,SRR24821469,SRR24821470)
14:24133016-24135203	2187	-44.1927	0.913106	0.971157	0.426511	30	0.863358	0.276294	28	-0.610772	48.0243	0.6246	2.51146	-652	0.600503	0	-33	0	-33	31.5	41637.1	10	1.70273	3.20627	0.117794	piRNA	mouse	3849069296	(SRR13848060-SRR13848062, SRR24821465,SRR24821466,SRR24821469,SRR24821470)
14:24136654-24137545	891	-42.9803	0.93106	0.990589	0.445321	29	0.957008	0.104903	29	-0.108505	56.2229	0.619529	0.607853	-310.6	1.25034	0	-33	0	-33	30.5	121966	10	2.51261	1.64533	0.0981465	piRNA	mouse	3849069296	(SRR13848060-SRR13848062, SRR24821465,SRR24821466,SRR24821469,SRR24821470)
14:24137553-24138558	1005	-35.0844	0.94792	0.991473	0.456396	29	0.910966	0.309042	28	1.7474	686.42	0.628856	2.48808	-326.1	0.768472	0	-33	0	-33	30.5	151127	10	2.35806	1.64533	0.181558	piRNA	mouse	3849069296	(SRR13848060-SRR13848062, SRR24821465,SRR24821466,SRR24821469,SRR24821470)
14:24142402-24143883	1481	-43.9778	0.929242	0.990982	0.435582	30	0.905659	0.447032	28	0.3849	13.8956	0.633356	2.58224	-481.1	0.458952	0	-33	0	-33	31	14965.6	10	2.90856	-0.00225828	0.109053	piRNA	mouse	3849069296	(SRR13848060-SRR13848062, SRR24821465,SRR24821466,SRR24821469,SRR24821470)
14:45172937-45181247	8310	-54.7492	0.839977	0.919371	0.424588	30	0.873954	0.303944	20	-0.358962	102.211	0.590373	2.2909	-2412.31	0	0	-33	0	-33	31.5	6799.72	10	1.49546	3.00327	0.135403	piRNA	mouse	3849069296	(SRR13848060-SRR13848062, SRR24821465,SRR24821466,SRR24821469,SRR24821470)
14:45176099-45177664	1565	-55.0409	0.87017	0.975991	0.438243	30	0.915674	0.402791	33	-0.490633	530.291	0.585303	1.94208	-426.1	1.94667	0	-33	0	-33	31	41874.7	10	1.71959	1.64533	0.124435	piRNA	mouse	3849069296	(SRR13848060-SRR13848062, SRR24821465,SRR24821466,SRR24821469,SRR24821470)
15:74511536-74513318	1782	-44.9846	0.934451	0.97924	0.468382	29	0.952115	0.134743	20	2.608	1499.36	0.632997	1.69079	-649.5	-0.130226	0	-33	0	-33	30.5	97401.9	10	1.30471	1.64533	0.0746697	piRNA	mouse	3849069296	(SRR13848060-SRR13848062, SRR24821465,SRR24821466,SRR24821469,SRR24821470)
17:22732735-22739138	6403	-51.9839	0.834145	0.5	0.4208	30	0.60565	0.17545	20	2.11052	2607.54	0.632516	1.99371	-1831.32	-0.707107	0	-33	0	-33	30.5	156762	10	1.32527	1.13304	0.154081	piRNA	mouse	3849069296	(SRR13848060-SRR13848062, SRR24821465,SRR24821466,SRR24821469,SRR24821470)
17:27545314-27545980	666	-29.2078	0.95329	0.971062	0.395259	27	0.884638	0.281996	28	0.30869	6941.12	0.630631	2.83114	-218.2	-0.720082	0	-33	0	-33	31	164273	10	0.989861	1.08689	0.194591	piRNA	mouse	3849069296	(SRR13848060-SRR13848062, SRR24821465,SRR24821466,SRR24821469,SRR24821470)
17:27575153-27576693	1540	-38.6847	0.90226	0.977231	0.484799	30	0.934135	0.0883416	28	2.15119	168.492	0.661039	2.09054	-592.5	0.1849	0	-33	0	-33	25	10347.4	10	0.696714	3.04123	0.0540909	piRNA	mouse	3849069296	(SRR13848060-SRR13848062, SRR24821465,SRR24821466,SRR24821469,SRR24821470)
17:56529037-56529399	362	-25.2084	0.911493	0.612347	0.41925	28	0.598075	0.201792	20	1.97351	310322	0.624309	1.50774	-99.3	-0.349428	0	-33	0	-33	31	2018254	10	0.299374	0.609695	0.361102	piRNA	mouse	3849069296	(SRR13848060-SRR13848062, SRR24821465,SRR24821466,SRR24821469,SRR24821470)
17:66514870-66516221	1351	-46.5082	0.849607	0.759878	0.456745	30	0.767173	0.189742	20	-0.506043	867.957	0.606958	1.88492	-455.69	0.8	0	-33	0	-33	32	186800	10	1.40243	1.22128	0.0919657	piRNA	mouse	3849069296	(SRR13848060-SRR13848062, SRR24821465,SRR24821466,SRR24821469,SRR24821470)
17:66516224-66517822	1598	-48.8043	0.865113	0.821828	0.44275	31	0.79331	0.355605	28	-0.534418	1123.88	0.667084	1.71494	-538.8	1.01052	0	-33	0	-33	26.5	348352	10	0.721901	-0.0869226	0.161014	piRNA	mouse	3849069296	(SRR13848060-SRR13848062, SRR24821465,SRR24821466,SRR24821469,SRR24821470)
19:61162540-61163255	715	-40.4083	0.873647	0.605767	0.375806	30	0.493578	0.333834	20	-0.0891508	74473.9	0.593007	2.61034	-183.3	-0.730297	0	-33	0	-33	30.5	1695682	10	0.116724	0.208166	0.361984	piRNA	mouse	3849069296	(SRR13848060-SRR13848062, SRR24821465,SRR24821466,SRR24821469,SRR24821470)
1:110868747-110869793	1046	-31.7335	0.89364	0.629173	0.385628	30	0.508708	0.363328	29	-0.103565	328012	0.552581	2.74731	-257	-0.486864	0	-33	0	-33	31	552008	10	1.6607	1.95089	0.41074	piRNA	mouse	3849069296	(SRR13848060-SRR13848062, SRR24821465,SRR24821466,SRR24821469,SRR24821470)
1:13283059-13283760	701	-40.3123	0.874221	0.629258	0.377491	30	0.503297	0.336126	20	-0.141737	77197.8	0.587732	2.72245	-174.5	-0.204188	0	-33	0	-33	30.5	1764973	10	-0.062297	-0.0188419	0.360852	piRNA	mouse	3849069296	(SRR13848060-SRR13848062, SRR24821465,SRR24821466,SRR24821469,SRR24821470)
1:34638822-34643393	4571	-40.001	0.89628	0.703235	0.452052	29	0.74789	0.144866	20	-0.523135	1567.65	0.616058	1.96402	-1496.5	-0.772221	0	-33	0	-33	31	115044	10	1.1969	0.725332	0.107135	piRNA	mouse	3849069296	(SRR13848060-SRR13848062, SRR24821465,SRR24821466,SRR24821469,SRR24821470)
1:41127258-41129744	2486	-40.2798	0.907735	0.805525	0.47915	28	0.24397	0.216676	20	-0.264506	40146.9	0.651649	2.16673	-810.4	0.359399	0	-33	0	-33	30.5	609966	19	0.377228	0.112029	0.244387	piRNA	mouse	3849069296	(SRR13848060-SRR13848062, SRR24821465,SRR24821466,SRR24821469,SRR24821470)
1:52629121-52630534	1413	-35.8447	0.894484	0.50199	0.390654	30	0.345562	0.375497	29	0.675638	541789	0.635527	2.66212	-468.6	-1.25766	0	-33	0	-33	31	525523	19	0.705792	1.02624	0.377401	piRNA	mouse	3849069296	(SRR13848060-SRR13848062, SRR24821465,SRR24821466,SRR24821469,SRR24821470)
1:8193803-8198830	5027	-51.7916	0.886577	0.895496	0.412765	30	0.199427	0.350945	20	2.34932	34489.1	0.612691	2.25549	-1551.6	-0.142134	0	-33	0	-33	31.5	49130.1	28	0.176981	0.090004	0.302071	piRNA	mouse	3849069296	(SRR13848060-SRR13848062, SRR24821465,SRR24821466,SRR24821469,SRR24821470)
2:111117143-111117949	806	-40.2273	0.873208	0.61077	0.374928	30	0.486886	0.333845	20	-0.243487	68917.4	0.602978	2.63396	-214.9	-0.289973	0	-33	0	-33	30.5	1545061	10	0.248939	0.0332231	0.366211	piRNA	mouse	3849069296	(SRR13848060-SRR13848062, SRR24821465,SRR24821466,SRR24821469,SRR24821470)
2:131488392-131488923	531	-27.3633	0.923232	0.900606	0.405356	27	0.761152	0.232135	29	-0.155683	191641	0.576271	2.76853	-150.3	0.414406	0	-33	0	-33	30.5	1071893	24	-0.107573	0.0283789	0.266349	piRNA	mouse	3849069296	(SRR13848060-SRR13848062, SRR24821465,SRR24821466,SRR24821469,SRR24821470)
2:150989847-150990834	987	-55.3603	0.912174	0.995818	0.368994	30	0.955587	0.231328	20	-0.140028	168.388	0.58156	1.46151	-235.2	-0.503953	0	-33	0	-33	31	10636.5	10	2.71163	-0.0439814	0.134963	piRNA	mouse	3849069296	(SRR13848060-SRR13848062, SRR24821465,SRR24821466,SRR24821469,SRR24821470)
2:151157184-151174367	17183	-55.0246	0.841317	0.820614	0.396289	30	0.776629	0.23207	20	0.136884	33.6228	0	-33	0	-33	0	-33	0	-33	32	912.019	10	0.666749	1.70837	0.141296	piRNA	mouse	3849069296	(SRR13848060-SRR13848062, SRR24821465,SRR24821466,SRR24821469,SRR24821470)
2:151169724-151173533	3809	-53.4508	0.866788	0.945627	0.375323	30	0.884255	0.247281	20	0.317517	555.28	0.607509	2.78083	-1020.1	-0.843274	0	-33	0	-33	32	4828.95	24	1.12631	1.92538	0.175518	piRNA	mouse	3849069296	(SRR13848060-SRR13848062, SRR24821465,SRR24821466,SRR24821469,SRR24821470)
2:92369985-92388964	18979	-47.9133	0.863764	0.641396	0.432354	30	0.661407	0.227375	28	1.60591	151.785	0	-33	0	-33	0	-33	0	-33	31.5	3375.69	10	1.29993	0.451855	0.167886	piRNA	mouse	3849069296	(SRR13848060-SRR13848062, SRR24821465,SRR24821466,SRR24821469,SRR24821470)
2:92389683-92429879	40196	-48.1676	0.865327	0.5	0.447235	30	0.5758	0.2348	20	1.62197	64.91	0	-33	0	-33	0	-33	0	-33	31	7548.84	10	1.67267	1.555	0.14717	piRNA	mouse	3849069296	(SRR13848060-SRR13848062, SRR24821465,SRR24821466,SRR24821469,SRR24821470)
2:92392782-92393615	833	-48.5928	0.899227	0.985319	0.422158	30	0.9396	0.245443	32	-0.585593	0	0.681873	1.21339	-268.3	1.19092	0	-33	0	-33	31	535536	10	1.36307	3.20627	0.102772	piRNA	mouse	3849069296	(SRR13848060-SRR13848062, SRR24821465,SRR24821466,SRR24821469,SRR24821470)
2:92403071-92404160	1089	-46.5543	0.899953	0.984252	0.423488	29	0.949409	0.385433	28	-0.950969	72.197	0.633609	2.02522	-361.5	1.13569	0	-33	0	-33	31	75481.9	10	2.03551	1.64533	0.157823	piRNA	mouse	3849069296	(SRR13848060-SRR13848062, SRR24821465,SRR24821466,SRR24821469,SRR24821470)
2:92404292-92404979	687	-33.7288	0.916286	0.990589	0.453619	29	0.935909	0.458742	33	-0.712021	483.793	0.652111	2.67088	-237.9	0.702247	0	-33	0	-33	30	930818	10	2.22532	2.22532	0.163441	piRNA	mouse	3849069296	(SRR13848060-SRR13848062, SRR24821465,SRR24821466,SRR24821469,SRR24821470)
2:92406872-92407773	901	-44.8077	0.87322	0.989903	0.399421	31	0.95585	0.228569	29	0.00566285	1842.2	0.643729	2.31783	-282.1	-0.142134	0	-33	0	-33	31.5	828465	10	3.20627	0.994871	0.158166	piRNA	mouse	3849069296	(SRR13848060-SRR13848062, SRR24821465,SRR24821466,SRR24821469,SRR24821470)
2:92407978-92409498	1520	-50.8211	0.914468	0.978953	0.421454	30	0.82281	0.212824	19	-0.434534	10.8709	0.65	1.82941	-469.5	-0.0266667	0	-33	0	-33	31	31993	10	1.50873	2.35047	0.108404	piRNA	mouse	3849069296	(SRR13848060-SRR13848062, SRR24821465,SRR24821466,SRR24821469,SRR24821470)
2:92409677-92410816	1139	-36.1608	0.929162	0.976753	0.424133	30	0.895878	0.190955	30	2.39323	7254.59	0.651449	2.30744	-372	0.505814	0	-33	0	-33	30.5	74813	10	1.88814	3.39405	0.20328	piRNA	mouse	3849069296	(SRR13848060-SRR13848062, SRR24821465,SRR24821466,SRR24821469,SRR24821470)
2:92416878-92417745	867	-48.5538	0.93569	0.976658	0.433542	30	0.933783	0.27698	30	2.11448	1122.31	0.662053	1.47115	-303.1	0.938937	0	-33	0	-33	30.5	133724	10	1.38356	3.39405	0.107445	piRNA	mouse	3849069296	(SRR13848060-SRR13848062, SRR24821465,SRR24821466,SRR24821469,SRR24821470)
2:92425499-92426070	571	-31.0462	0.927223	0.987278	0.479412	30	0.865008	0.40993	31	2.65443	123058	0.658494	1.47055	-207.1	-0.522145	0	-33	0	-33	30.5	632966	10	2.48243	3.39405	0.224386	piRNA	mouse	3849069296	(SRR13848060-SRR13848062, SRR24821465,SRR24821466,SRR24821469,SRR24821470)
3:10284241-10284898	657	-34.3224	0.874463	0.588371	0.396024	30	0.569479	0.361461	20	0.339647	98236.8	0.56621	2.38051	-155.8	0.377964	0	-33	0	-33	30.5	876364	10	0.53213	0.773743	0.394626	piRNA	mouse	3849069296	(SRR13848060-SRR13848062, SRR24821465,SRR24821466,SRR24821469,SRR24821470)
3:62269622-62270363	741	-40.6638	0.873537	0.634203	0.377321	30	0.507035	0.341074	20	-0.0749853	74989.8	0.582996	2.7004	-190.5	-0.081666	0	-33	0	-33	30.5	1788827	10	0.212674	-0.162309	0.367163	piRNA	mouse	3849069296	(SRR13848060-SRR13848062, SRR24821465,SRR24821466,SRR24821469,SRR24821470)
3:75259153-75260190	1037	-32.8601	0.891834	0.589227	0.380596	30	0.481499	0.354333	29	-0.0999615	317330	0.565092	2.67863	-255.9	-0.630733	0	-33	0	-33	31	571897	10	1.63264	1.98423	0.407026	piRNA	mouse	3849069296	(SRR13848060-SRR13848062, SRR24821465,SRR24821466,SRR24821469,SRR24821470)
4:107368942-107369643	701	-39.8148	0.872932	0.631051	0.376277	30	0.501289	0.336437	20	-0.103203	79490.1	0.587732	2.38688	-178.2	0.5547	0	-33	0	-33	30.5	1643225	10	0.173363	-0.0754174	0.364222	piRNA	mouse	3849069296	(SRR13848060-SRR13848062, SRR24821465,SRR24821466,SRR24821469,SRR24821470)
4:62149233-62157231	7998	-43.3827	0.895152	0.917684	0.462768	30	0.874736	0.175828	20	-0.659231	19.2641	0.653413	2.27875	-2969.5	-0.719907	0	-33	0	-33	31.5	574.071	10	1.7989	0.640295	0.130599	piRNA	mouse	3849069296	(SRR13848060-SRR13848062, SRR24821465,SRR24821466,SRR24821469,SRR24821470)
5:113489369-113490415	1046	-48.4725	0.913784	0.970309	0.461764	29	0.921308	0.173782	33	-0.469887	1032.58	0.621415	1.54533	-364.5	0.316723	0	-33	0	-33	30	523515	10	2.13771	2.65264	0.117636	piRNA	mouse	3849069296	(SRR13848060-SRR13848062, SRR24821465,SRR24821466,SRR24821469,SRR24821470)
5:113491688-113493106	1418	-45.3591	0.873029	0.928505	0.445891	29	0.903064	0.529712	20	1.66974	6118.49	0.647391	2.06792	-500.7	0.800327	0	-33	0	-33	30	92110.7	10	0.98669	1.50965	0.106976	piRNA	mouse	3849069296	(SRR13848060-SRR13848062, SRR24821465,SRR24821466,SRR24821469,SRR24821470)
5:149732719-149733862	1143	-45.4714	0.86106	0.971345	0.417497	32	0.243031	0.308305	20	0.168886	1176.05	0.55818	2.65467	-303.5	-0.333333	0	-33	0	-33	30.5	28029.1	10	0.0644952	-0.00169601	0.119532	piRNA	mouse	3849069296	(SRR13848060-SRR13848062, SRR24821465,SRR24821466,SRR24821469,SRR24821470)
6:123345967-123346824	857	-30.7257	0.894524	0.707445	0.36344	30	0.567812	0.396591	29	0.0573717	354976	0.546091	2.61848	-207.2	0.471405	0	-33	0	-33	31	723991	24	1.02658	1.47824	0.399348	piRNA	mouse	3849069296	(SRR13848060-SRR13848062, SRR24821465,SRR24821466,SRR24821469,SRR24821470)
6:127772656-127775397	2741	-50.2457	0.88742	0.5	0.410058	30	0.58315	0.3015	20	0.268131	1064.24	0.637723	0.886569	-832.6	-0.938109	0	-33	0	-33	30.5	149509	10	0.171366	0.227222	0.154945	piRNA	mouse	3849069296	(SRR13848060-SRR13848062, SRR24821465,SRR24821466,SRR24821469,SRR24821470)
6:127782575-127786509	3934	-50.966	0.862541	0.743108	0.437127	30	0.766441	0.178346	20	-0.246062	1281.64	0.643111	1.94434	-1319	1.44125	0	-33	0	-33	30	34434.5	10	1.19339	0.820682	0.154535	piRNA	mouse	3849069296	(SRR13848060-SRR13848062, SRR24821465,SRR24821466,SRR24821469,SRR24821470)
6:127809694-127810633	939	-43.4522	0.925551	0.992851	0.468169	29	0.936458	0.352661	20	-0.294654	421.63	0.609159	2.23339	-296.7	0.39841	0	-33	0	-33	31.5	23857.2	10	2.35047	0.692673	0.129124	piRNA	mouse	3849069296	(SRR13848060-SRR13848062, SRR24821465,SRR24821466,SRR24821469,SRR24821470)
6:128419648-128426261	6613	-55.6103	0.844661	0.788581	0.428877	30	0.777699	0.179087	20	0.148066	1577.97	0.643581	1.96801	-2128.8	-0.460006	0	-33	0	-33	31	20284.5	22	0.090706	2.52348	0.240895	piRNA	mouse	3849069296	(SRR13848060-SRR13848062, SRR24821465,SRR24821466,SRR24821469,SRR24821470)
6:69072251-69072992	741	-39.2855	0.871939	0.6173	0.375087	30	0.508636	0.327145	20	-0.145346	79591.2	0.623482	2.6859	-200	0.199205	0	-33	0	-33	30.5	1572107	10	0.394905	-0.101261	0.360104	piRNA	mouse	3849069296	(SRR13848060-SRR13848062, SRR24821465,SRR24821466,SRR24821469,SRR24821470)
7:131600067-131601135	1068	-32.8693	0.89382	0.628174	0.372316	30	0.522249	0.362275	29	0.305757	274365	0.578652	2.3328	-285.7	0.0390137	0	-33	0	-33	31	710875	10	0.875262	1.17111	0.394834	piRNA	mouse	3849069296	(SRR13848060-SRR13848062, SRR24821465,SRR24821466,SRR24821469,SRR24821470)
7:69559477-69560634	1157	-50.0511	0.898894	0.894614	0.408023	30	0.850241	0.307837	28	-0.45293	2034.21	0.6465	1.82328	-350.5	1.23117	0	-33	0	-33	30.5	183888	10	0.121484	1.05305	0.136662	piRNA	mouse	3849069296	(SRR13848060-SRR13848062, SRR24821465,SRR24821466,SRR24821469,SRR24821470)
7:72755226-72756790	1564	-52.8275	0.851561	0.942951	0.406433	31	0.895521	0.39472	31	-0.292566	331.895	0.601023	2.01352	-457	-0.62361	0	-33	0	-33	25.5	25479.3	28	1.08611	2.29972	0.134162	piRNA	mouse	3849069296	(SRR13848060-SRR13848062, SRR24821465,SRR24821466,SRR24821469,SRR24821470)
7:72765981-72766510	529	-41.4774	0.887917	0.986777	0.435075	30	0.922143	0.209986	29	0.308516	219.298	0.669187	1.85769	-152.6	-1.04257	0	-33	0	-33	29.5	186404	10	0.664937	2.22532	0.138816	piRNA	mouse	3849069296	(SRR13848060-SRR13848062, SRR24821465,SRR24821466,SRR24821469,SRR24821470)
7:72786684-72787218	534	-36.2381	0.872273	0.976724	0.438309	31	0.946477	0.484192	20	2.1307	2489.42	0.554307	2.49899	-146.1	-0.301511	0	-33	0	-33	30.5	250809	10	2.64529	2.69192	0.185088	piRNA	mouse	3849069296	(SRR13848060-SRR13848062, SRR24821465,SRR24821466,SRR24821469,SRR24821470)
7:73465925-73468032	2107	-46.2024	0.886156	0.591821	0.45735	30	0.602533	0.256318	20	-0.304541	2988.42	0.661604	2.49185	-774.8	-0.479877	0	-33	0	-33	31.5	286463	10	0.403411	0.367641	0.125949	piRNA	mouse	3849069296	(SRR13848060-SRR13848062, SRR24821465,SRR24821466,SRR24821469,SRR24821470)
8:110855453-110856560	1107	-45.0972	0.884881	0.950209	0.390066	30	0.929685	0.259692	31	-0.566524	1133.94	0.610659	2.00111	-320.6	-0.167177	0	-33	0	-33	29.5	308631	10	1.23134	1.229	0.172759	piRNA	mouse	3849069296	(SRR13848060-SRR13848062, SRR24821465,SRR24821466,SRR24821469,SRR24821470)
8:18628655-18629701	1046	-31.0172	0.898891	0.572261	0.382754	28	0.483362	0.341268	29	-0.108843	322079	0.556405	2.7037	-263.9	0.391618	0	-33	0	-33	30.5	499393	10	1.69005	2.11248	0.395191	piRNA	mouse	3849069296	(SRR13848060-SRR13848062, SRR24821465,SRR24821466,SRR24821469,SRR24821470)
9:54159104-54160030	926	-45.7398	0.914558	0.993246	0.416848	30	0.972586	0.440802	20	-0.363636	38.0315	0.613391	2.73361	-271.8	0.528286	0	-33	0	-33	24.5	17912.8	10	1.14336	1.14881	0.127938	piRNA	mouse	3849069296	(SRR13848060-SRR13848062, SRR24821465,SRR24821466,SRR24821469,SRR24821470)
9:5900099-5901354	1255	-34.4244	0.863954	0.856971	0.422371	30	0.721313	0.579141	20	2.34071	256397	0.549801	2.67882	-355.7	0.553408	0	-33	0	-33	31	8017493	10	1.56109	2.03386	0.117963	piRNA	mouse	3849069296	(SRR13848060-SRR13848062, SRR24821465,SRR24821466,SRR24821469,SRR24821470)
9:62774415-62775156	741	-39.986	0.873666	0.6139	0.375309	30	0.489582	0.332821	20	-0.172687	77331.8	0.604588	2.65209	-196.8	-0.485217	0	-33	0	-33	30.5	1584534	10	0.246775	0.0932456	0.364984	piRNA	mouse	3849069296	(SRR13848060-SRR13848062, SRR24821465,SRR24821466,SRR24821469,SRR24821470)
9:67657795-67658491	696	-37.1441	0.860376	0.974756	0.436877	31	0.875631	0.181084	20	-0.581231	2524.4	0.528736	1.89934	-156.3	-33	0	-33	0	-33	31	111579	10	1.76931	1.79005	0.289633	piRNA	mouse	3849069296	(SRR13848060-SRR13848062, SRR24821465,SRR24821466,SRR24821469,SRR24821470)
9:67662143-67663536	1393	-48.1157	0.895111	0.976562	0.387693	30	0.916894	0.359473	20	0.137386	1216.38	0.604451	2.22584	-393.6	1.50661	0	-33	0	-33	30	83524.8	10	1.30594	3.00327	0.240776	piRNA	mouse	3849069296	(SRR13848060-SRR13848062, SRR24821465,SRR24821466,SRR24821469,SRR24821470)
9:90695462-90696163	701	-40.3971	0.870781	0.624405	0.376647	30	0.499796	0.350183	20	-0.0691274	75010.2	0.601997	2.80812	-183.8	0.0532058	0	-33	0	-33	30.5	1775513	10	0.264925	-0.0652299	0.360919	piRNA	mouse	3849069296	(SRR13848060-SRR13848062, SRR24821465,SRR24821466,SRR24821469,SRR24821470)
9:93282167-93282908	741	-40.6638	0.873537	0.634203	0.377321	30	0.507035	0.341074	20	-0.0749853	74989.8	0.582996	2.7004	-190.5	-0.081666	0	-33	0	-33	30.5	1788827	10	0.212674	-0.162309	0.367163	piRNA	mouse	3849069296	(SRR13848060-SRR13848062, SRR24821465,SRR24821466,SRR24821469,SRR24821470)
X:66535658-66536397	739	-39.3702	0.870519	0.597874	0.375082	30	0.340468	0.435436	20	-0.292332	69879.5	0.635995	2.61834	-198	-0.365732	0	-33	0	-33	30.5	1577463	10	-0.0348696	-0.168252	0.354359	piRNA	mouse	3849069296	(SRR13848060-SRR13848062, SRR24821465,SRR24821466,SRR24821469,SRR24821470)
X:66535658-66536397	739	-39.3702	0.870519	0.597874	0.375082	30	0.340468	0.435436	20	-0.292332	69879.5	0.635995	2.61834	-198	-0.365732	0	-33	0	-33	30.5	1577463	10	-0.0348696	-0.168252	0.354359	piRNA	mouse	3849069296	(SRR13848060-SRR13848062, SRR24821465,SRR24821466,SRR24821469,SRR24821470)
NNSW01000001.1:16197240-16198077	837	-54.0721	0.761006	0.723956	0.518168	31	0.634475	0.240498	22	-0.234566	36301.4	0.578256	1.25701	-198.1	0.777072	0	-33	0	-33	31.5	1331201	10	0.936144	1.07104	0.222634	piRNA	planarian	2016209616	all_planarian
NNSW01000014.1:5516665-5517648	983	-54.1733	0.671453	0.51709	0.39036	32	0.512126	0.140907	28	-0.507443	4245.26	0.5941	0.573562	-261.8	0.800327	0	-33	0	-33	32.5	12179127	10	1.33994	0.0399344	0.0969286	piRNA	planarian	2016209616	all_planarian
NNSW01000016.1:6995862-6996309	447	-32.6684	0.769797	0.938086	0.4649	30	0.851501	0.0403377	33	0.729438	130159	0.684564	1.29635	-151.8	0.333333	0	-33	0	-33	27	1322333	10	1.81929	1.78789	0.0978959	piRNA	planarian	2016209616	all_planarian
NNSW01000023.1:3963055-3963606	551	-38.2304	0.705785	0.898638	0.353288	31	0.72819	0.664902	33	-0.462935	4790.72	0.595281	-0.0047356	-129.8	-0.781736	0	-33	0	-33	32.5	977307	10	0.674955	1.04384	0.238528	piRNA	planarian	2016209616	all_planarian
NNSW01000027.1:131750-132181	431	-40.7904	0.759413	0.887233	0.478425	30	0.801437	0.0665425	32	1.14164	1081034	0.635731	1.76887	-148	1.03294	0	-33	0	-33	27	965424	10	1.33105	1.4821	0.14063	piRNA	planarian	2016209616	all_planarian
NNSW01000032.1:4731054-4732047	993	-52.5016	0.724935	0.729301	0.402086	32	0.520984	0.304552	33	0.122111	275644	0.537764	0.94828	-226.3	-1.1757	0	-33	0	-33	33	674781	10	0.4568	0.695426	0.371244	piRNA	planarian	2016209616	all_planarian
NNSW01000045.1:4519316-4520031	715	-39.3792	0.775706	0.733677	0.333144	32	0.626726	0.42593	33	0.718848	81207.6	0.581818	1.27039	-136.7	-1.27094	0	-33	0	-33	32.5	571495	10	0.48058	0.886324	0.42359	piRNA	planarian	2016209616	all_planarian
NNSW01000051.1:644384-644920	536	-41.1418	0.7864	0.906043	0.552155	31	0.83963	0.101024	26	0.159337	7746.93	0.641791	1.33762	-129.6	-0.333333	0	-33	0	-33	31.5	904374	9	0.633249	0.828303	0.134442	piRNA	planarian	2016209616	all_planarian
NNSW01000063.1:1972590-1973445	855	-57.4474	0.754913	0.617818	0.516213	31	0.380267	0.479921	33	1.03984	47748.6	0.523977	2.44263	-217.3	-0.251976	0	-33	0	-33	32.5	1755896	10	0.516064	0.12476	0.237266	piRNA	planarian	2016209616	all_planarian
NNSW01000127.1:85321-86160	839	-53.6429	0.671488	0.509035	0.391749	32	0.505269	0.138967	31	-0.469676	5631.65	0.607866	0.923737	-236.5	-0.666667	0	-33	0	-33	32.5	40804681	10	1.72297	0.439104	0.0926583	piRNA	planarian	2016209616	all_planarian
NNSW01000197.1:910375-911232	857	-57.5395	0.760107	0.636821	0.519894	31	0.55085	0.16137	33	1.85208	88206.3	0.683781	1.93379	-305.3	0.383976	0	-33	0	-33	32.5	1744476	10	1.65909	0.806703	0.248659	piRNA	planarian	2016209616	all_planarian
NNSW01000229.1:242064-242921	857	-57.4006	0.752774	0.637389	0.515975	31	0.508254	0.149723	21	0.401072	37062.2	0.660443	2.39858	-278.9	0.420214	0	-33	0	-33	32.5	1721113	10	1.59171	0.987041	0.229418	piRNA	planarian	2016209616	all_planarian
NNSW01000362.1:71765-72344	579	-40.4084	0.698233	0.922892	0.34862	31	0.724578	0.693976	32	-0.404191	9638.55	0.604491	-0.164149	-140.3	-0.471405	0	-33	0	-33	32.5	1157108	10	-0.0689952	1.06126	0.24241	piRNA	planarian	2016209616	all_planarian
NNSW01000966.1:69129-69877	748	-45.0383	0.744177	0.841855	0.416203	32	0.604637	0.296473	33	0.138032	297067	0.510695	1.21596	-174.8	-0.7698	0	-33	0	-33	33	613357	10	0.814199	1.02517	0.402695	piRNA	planarian	2016209616	all_planarian
HE587301:5281703-5285059	3356	-42.6252	0.706295	0.81666	0.430942	26	0.778604	0.629808	27	0.244392	26876.9	0.576877	2.08977	-836.1	1.14708	0	-33	0	-33	26.5	6699862	10	0.873209	1.14233	0.0397237	piRNA	spidermite	2023667092	all_spidermite (SRR10513013-SRR10513019)
HE587301:6270308-6287435	17127	-62.7978	0.770334	0.5	0.425131	26	0.4391	0.20025	27	-0.0647508	493.349	0	-33	0	-33	0	-33	0	-33	26.5	21679.4	10	0.409109	-0.0686785	0.0365385	piRNA	spidermite	2023667092	all_spidermite (SRR10513013-SRR10513019)
HE587301:6276318-6277673	1355	-53.8297	0.720558	0.5	0.431589	26	0.45755	0.10855	25	-0.132077	1439.36	0.600738	-0.220973	-317.7	1.73205	0	-33	0	-33	27	2142950	10	0.604221	0.219945	0.0171394	piRNA	spidermite	2023667092	all_spidermite (SRR10513013-SRR10513019)
HE587302:3084613-3099725	15112	-62.6703	0.773959	0.5	0.39543	26	0.5133	0.21235	27	0.121965	473.215	0	-33	0	-33	0	-33	0	-33	26.5	86609.1	17	0.117481	-0.0918884	0.0291448	piRNA	spidermite	2023667092	all_spidermite (SRR10513013-SRR10513019)
HE587302:3586905-3588195	1290	-51.3988	0.745703	0.5	0.409715	26	0.4613	0.07345	27	-0.481162	17.3614	0.589147	-0.204597	-284.1	-0.933333	0	-33	0	-33	27	1845848	10	1.2113	0.849164	0.0152896	piRNA	spidermite	2023667092	all_spidermite (SRR10513013-SRR10513019)
HE587302:4363602-4366507	2905	-65.2922	0.675068	0.5	0.435533	26	0.5049	0.1813	26	-0.370733	70.8925	0.594836	0.543873	-602.9	-33	0	-33	0	-33	26.5	1424572	14	-0.12555	-0.385707	0.0146809	piRNA	spidermite	2023667092	all_spidermite (SRR10513013-SRR10513019)
HE587302:4379582-4381780	2198	-53.6648	0.751731	0.5	0.381493	26	0.4564	0.2032	27	1.89308	628228	0.544131	0.402848	-504.4	-0.707107	0	-33	0	-33	26.5	473821	28	-0.336302	0.249143	0.0320886	piRNA	spidermite	2023667092	all_spidermite (SRR10513013-SRR10513019)
HE587302:4577203-4578166	963	-45.849	0.832737	0.5	0.384057	25	0.49955	0.3203	26	-0.378465	1902.95	0.612669	-0.0536212	-212	-0.333333	0	-33	0	-33	26.5	721232	14	0.510625	1.11427	0.0293838	piRNA	spidermite	2023667092	all_spidermite (SRR10513013-SRR10513019)
HE587303:1940663-1941370	707	-28.6023	0.689398	0.892061	0.428475	26	0.866637	0.144514	27	-0.358139	195.379	0.565771	1.92238	-159.1	-0.438397	0	-33	0	-33	26.5	5659894	15	0.576219	1.90505	0.0284277	piRNA	spidermite	2023667092	all_spidermite (SRR10513013-SRR10513019)
HE587303:3813467-3814249	782	-35.9567	0.749399	0.74239	0.276397	26	0.428359	0.486563	25	-0.568522	778.083	0.404092	0.0117219	-88.17	-33	0	-33	0	-33	26.5	8831033	9	0.504063	1.51496	0.0357918	piRNA	spidermite	2023667092	all_spidermite (SRR10513013-SRR10513019)
HE587303:3849092-3855444	6352	-63.3952	0.755146	0.5	0.456964	26	0.47645	0.0938	27	0.505341	240.142	0.616499	2.09257	-1440.9	-0.503953	0	-33	0	-33	27	22744.2	20	-0.00165008	0.418318	0.0145438	piRNA	spidermite	2023667092	all_spidermite (SRR10513013-SRR10513019)
HE587303:3849934-3851134	1200	-60.8487	0.707366	0.5	0.457273	26	0.448	0.05845	25	-0.361451	74.8714	0.603333	2.29295	-308.7	-33	0	-33	0	-33	27	196495	20	0.219524	1.0363	0.0148174	piRNA	spidermite	2023667092	all_spidermite (SRR10513013-SRR10513019)
HE587304:3442131-3463783	21652	-65.3883	0.694082	0.5	0.417071	26	0.4831	0.15385	27	0.335371	251.537	0	-33	0	-33	0	-33	0	-33	27	29222.3	10	-0.181173	-0.408448	0.0133035	piRNA	spidermite	2023667092	all_spidermite (SRR10513013-SRR10513019)
HE587304:3461105-3462434	1329	-46.3656	0.76611	0.5	0.371183	26	0.4945	0.2519	26	2.42155	12136.5	0.562829	1.50233	-247.1	-33	0	-33	0	-33	27	862550	20	0.392833	1.46445	0.0229751	piRNA	spidermite	2023667092	all_spidermite (SRR10513013-SRR10513019)
HE587305:3281868-3283400	1532	-41.5582	0.754378	0.5	0.399988	26	0.42115	0.3995	27	-0.331021	8276.57	0.678851	2.06172	-377.6	0.259469	0	-33	0	-33	27	9108625	10	0.353996	0.564839	0.0642325	piRNA	spidermite	2023667092	all_spidermite (SRR10513013-SRR10513019)
HE587306:1620238-1620834	596	-31.448	0.737531	0.82481	0.284758	26	0.787611	0.118443	26	-0.770614	2261.78	0.721476	1.83879	-188.1	0.208232	0	-33	0	-33	26.5	5715672	11	0.751037	0.998806	0.0535532	piRNA	spidermite	2023667092	all_spidermite (SRR10513013-SRR10513019)
HE587307:1558630-1564283	5653	-56.0232	0.707264	0.5	0.412585	26	0.57805	0.12005	26	1.04518	918.965	0.591544	1.55621	-1177.1	-33	0	-33	0	-33	26.5	227753	9	0.795445	0.750603	0.0172346	piRNA	spidermite	2023667092	all_spidermite (SRR10513013-SRR10513019)
HE587307:2816502-2817679	1177	-37.8297	0.763101	0.584283	0.359568	26	0.379258	0.43383	27	2.59978	182418	0.661003	0.0811334	-250.6	1.50821	0	-33	0	-33	26.5	6454929	10	-0.620888	0.311455	0.0584126	piRNA	spidermite	2023667092	all_spidermite (SRR10513013-SRR10513019)
HE587307:3240013-3254467	14454	-62.804	0.796912	0.5	0.406645	26	0.44115	0.35465	27	0.0961175	129.27	0	-33	0	-33	0	-33	0	-33	27	28548.1	14	-0.697697	-0.346688	0.0403634	piRNA	spidermite	2023667092	all_spidermite (SRR10513013-SRR10513019)
HE587307:3519476-3521417	1941	-51.5045	0.803829	0.5	0.428891	26	0.59885	0.38165	26	-0.444665	3989.43	0.563627	-0.315957	-412.6	-1.2936	0	-33	0	-33	26.5	970262	11	1.04413	1.47935	0.0482721	piRNA	spidermite	2023667092	all_spidermite (SRR10513013-SRR10513019)
HE587308:48783-50819	2036	-58.3362	0.751009	0.5	0.41876	26	0.4722	0.25715	27	0.337185	374.81	0.522593	-0.0497262	-429.7	-33	0	-33	0	-33	26.5	3210961	7	1.54165	1.21117	0.0228058	piRNA	spidermite	2023667092	all_spidermite (SRR10513013-SRR10513019)
HE587308:706986-709151	2165	-63.543	0.770164	0.5	0.433446	26	0.6174	0.60215	25	0.995965	4271.12	0.569977	0.0628645	-509.1	-0.710669	0	-33	0	-33	27	598823	10	0.549682	0.993884	0.0188268	piRNA	spidermite	2023667092	all_spidermite (SRR10513013-SRR10513019)
HE587309:3509238-3509935	697	-39.8612	0.777467	0.5	0.428761	26	0.4516	0.14745	26	-0.393916	1586.73	0.596844	0.0305618	-147.1	-33	0	-33	0	-33	26.5	1219009	14	1.59054	1.33429	0.027986	piRNA	spidermite	2023667092	all_spidermite (SRR10513013-SRR10513019)
HE587312:1377085-1377897	812	-42.7201	0.757277	0.645536	0.335059	26	0.685753	0.644503	27	-0.418962	152.27	0.566503	0.544426	-159.12	-0.503953	0	-33	0	-33	26.5	40412266	10	1.61589	1.64533	0.0141253	piRNA	spidermite	2023667092	all_spidermite (SRR10513013-SRR10513019)
HE587312:2319732-2321345	1613	-50.4679	0.777776	0.5	0.405827	26	0.4897	0.1562	26	-0.203885	4066.09	0.588965	2.30071	-356.1	0.843274	0	-33	0	-33	26.5	6351119	10	0.0637826	0.394932	0.036625	piRNA	spidermite	2023667092	all_spidermite (SRR10513013-SRR10513019)
HE587315:8358-9951	1593	-52.2628	0.707824	0.5	0.459419	26	0.5379	0.0873	26	-0.332581	891.508	0.608914	-0.328406	-389.9	0.503953	0	-33	0	-33	25.5	1276503	20	-0.189179	0.249377	0.0212858	piRNA	spidermite	2023667092	all_spidermite (SRR10513013-SRR10513019)
HE587316:1482064-1483751	1687	-62.9137	0.769441	0.5	0.420181	26	0.51065	0.31805	27	1.58246	4707.27	0.551275	-0.00531762	-323.8	-33	0	-33	0	-33	26	120087	22	0.554487	0.660345	0.0126548	piRNA	spidermite	2023667092	all_spidermite (SRR10513013-SRR10513019)
HE587316:1518571-1519259	688	-33.104	0.72798	0.750976	0.369451	26	0.708171	0.202613	27	-0.76689	28912.9	0.607558	-0.125979	-137.9	2.41119	0	-33	0	-33	27	9800628	10	1.43223	3.00327	0.0525744	piRNA	spidermite	2023667092	all_spidermite (SRR10513013-SRR10513019)
HE587316:1902551-1903159	608	-35.1999	0.701975	0.841043	0.42456	26	0.825063	0.456266	25	-0.478462	38.3671	0.565789	2.41891	-120.2	-33	0	-33	0	-33	26.5	7154581	10	1.5412	3.39405	0.0180709	piRNA	spidermite	2023667092	all_spidermite (SRR10513013-SRR10513019)
HE587317:346923-349558	2635	-59.8529	0.756845	0.5	0.426747	26	0.45695	0.19635	26	-0.59899	185.52	0.620873	0.886926	-635.5	-0.576615	0	-33	0	-33	27	488151	10	0.374675	0.0412447	0.0284395	piRNA	spidermite	2023667092	all_spidermite (SRR10513013-SRR10513019)
HE587319:1019564-1020706	1142	-36.8081	0.717468	0.617513	0.367831	26	0.528961	0.291157	26	-0.423128	1578.18	0.602452	0.984355	-226.3	-0.69838	0	-33	0	-33	26.5	1132266	14	1.12746	2.48243	0.0396799	piRNA	spidermite	2023667092	all_spidermite (SRR10513013-SRR10513019)
HE587320:1009725-1010850	1125	-46.6546	0.720295	0.5	0.395112	26	0.539	0.2445	27	-0.302125	75.673	0.572444	0.493813	-232.1	0.438397	0	-33	0	-33	26	431948	11	0.454441	0.791202	0.0130473	piRNA	spidermite	2023667092	all_spidermite (SRR10513013-SRR10513019)
HE587331:15533-16069	536	-36.7994	0.675809	0.5	0.394613	26	0.3941	0.30215	26	-0.365148	631.126	0.593284	-0.162539	-123.6	0	0	-33	0	-33	26.5	90344260	10	1.49961	1.67251	0.0192122	piRNA	spidermite	2023667092	all_spidermite (SRR10513013-SRR10513019)
HE587337:74081-75296	1215	-39.139	0.75027	0.5	0.423454	26	0.4869	0.44455	27	-0.501451	2651.57	0.607407	0.955174	-319.6	1.60737	0	-33	0	-33	26.5	1389584	11	0.362297	0.985981	0.0541396	piRNA	spidermite	2023667092	all_spidermite (SRR10513013-SRR10513019)
HE587339:201315-203524	2209	-63.6284	0.743812	0.5	0.408098	26	0.5124	0.28495	27	0.844377	4772.37	0.578542	0.141402	-469.9	-33	0	-33	0	-33	26	123601	21	-0.0483685	0.337564	0.0150079	piRNA	spidermite	2023667092	all_spidermite (SRR10513013-SRR10513019)
HE587339:27768-28303	535	-35.6595	0.669037	0.5	0.388765	26	0.502	0.48775	26	0.858692	1062.88	0.534579	-0.166416	-108.8	-0.333333	0	-33	0	-33	26.5	79579098	10	-0.00641602	0.753145	0.0177405	piRNA	spidermite	2023667092	all_spidermite (SRR10513013-SRR10513019)
HE587339:41508-42739	1231	-47.3688	0.716625	0.5	0.412549	26	0.44815	0.13345	26	-0.109591	217243	0.617384	-0.115413	-290.1	1.76383	0	-33	0	-33	26	16088411	27	1.26341	1.25928	0.028709	piRNA	spidermite	2023667092	all_spidermite (SRR10513013-SRR10513019)
HE587344:106420-110447	4027	-64.8807	0.744983	0.5	0.42843	26	0.4726	0.3918	27	-0.710945	8.4865	0.613857	-0.112684	-967.2	-0.692965	0	-33	0	-33	26	89305.1	10	0.715018	1.17045	0.0160429	piRNA	spidermite	2023667092	all_spidermite (SRR10513013-SRR10513019)
HE587371:20156-21197	1041	-49.5742	0.895568	0.5	0.357687	25	0.4861	0.27805	26	-0.673034	781.593	0.536023	1.18966	-224.5	-33	0	-33	0	-33	26.5	26053324	10	-0.34761	0.868351	0.0229033	piRNA	spidermite	2023667092	all_spidermite (SRR10513013-SRR10513019)
HE587443:4106-5148	1042	-50.4494	0.786025	0.5	0.381858	25	0.34625	0.4224	27	-0.118591	11732.5	0.533589	1.98144	-248.1	-0.712276	0	-33	0	-33	26.5	22325082	10	0.14275	1.42421	0.0270995	piRNA	spidermite	2023667092	all_spidermite (SRR10513013-SRR10513019)
HE587725:1812-2880	1068	-41.1942	0.726025	0.5	0.425285	26	0.4995	0.1736	26	-0.213687	5159.61	0.586142	-0.16686	-273.8	-33	0	-33	0	-33	27	4393541	10	0.845275	1.78501	0.0261507	piRNA	spidermite	2023667092	all_spidermite (SRR10513013-SRR10513019)
11:4284951-4285816	865	-25.5322	0.917098	0.731734	0.494342	28	0.686716	0.235424	20	0.599624	163469	0.631214	2.22267	-265	1.01436	0	-33	0	-33	28	381550	10	1.35349	0.321735	0.565683	piRNA	zebrafish	1462962046	all_zebrafish (SRR1554490-SRR1554494)
15:17808666-17809441	775	-22.1861	0.926386	0.660151	0.521913	28	0.554855	0.203026	20	-0.717416	3152.59	0.590968	2.19622	-242.4	0.843274	0	-33	0	-33	27.5	387768	10	0.951366	0.832457	0.645649	piRNA	zebrafish	1462962046	all_zebrafish (SRR1554490-SRR1554494)
15:25017966-25019013	1047	-38.3021	0.93162	0.670226	0.553035	30	0.487884	0.304937	31	-0.378746	14463.1	0.622732	1.09081	-322.1	0.40329	0	-33	0	-33	27.5	2000227	10	0.814391	0.955371	0.49682	piRNA	zebrafish	1462962046	all_zebrafish (SRR1554490-SRR1554494)
16:14504431-14505478	1047	-38.3595	0.933398	0.656389	0.554188	30	0.493622	0.296523	31	-0.129062	15890.4	0.595989	1.1108	-325.1	0.990792	0	-33	0	-33	27.5	2339748	10	0.808779	1.04771	0.507544	piRNA	zebrafish	1462962046	all_zebrafish (SRR1554490-SRR1554494)
16:19471277-19471955	678	-8.64605	0.976113	0.637413	0.531874	27	0.471132	0.318707	24	1.72687	18475.8	0.654867	1.05557	-268	-0.333333	0	-33	0	-33	27.5	228637	10	1.88701	2.5555	0.882217	piRNA	zebrafish	1462962046	all_zebrafish (SRR1554490-SRR1554494)
16:20046022-20046637	615	-14.1222	0.950114	0.67	0.425724	26	0.32375	0.39625	28	1.5178	43750	0.598374	1.94506	-154.1	-33	0	-33	0	-33	28.5	380000	10	1.26415	1.97686	0.71375	piRNA	zebrafish	1462962046	all_zebrafish (SRR1554490-SRR1554494)
16:20257446-20258124	678	-8.55343	0.976195	0.635731	0.531902	27	0.468678	0.317865	24	1.72687	18561.5	0.654867	1.05557	-267.1	-0.333333	0	-33	0	-33	27.5	229698	10	1.88701	2.5555	0.881671	piRNA	zebrafish	1462962046	all_zebrafish (SRR1554490-SRR1554494)
17:21476592-21477188	596	-34.7863	0.942083	0.684052	0.585165	30	0.523063	0.237062	31	-0.331644	25826.5	0.64094	1.52788	-220.4	-0.119081	0	-33	0	-33	27.5	1749070	10	1.11128	1.27715	0.4285	piRNA	zebrafish	1462962046	all_zebrafish (SRR1554490-SRR1554494)
17:23106868-23108552	1684	-18.609	0.923288	0.501529	0.556741	28	0.480887	0.266055	32	-0.421563	8409.79	0.710214	2.78294	-757	2.1176	0	-33	0	-33	26.5	298930	10	-0.192899	-0.392546	0.853975	piRNA	zebrafish	1462962046	all_zebrafish (SRR1554490-SRR1554494)
17:31178645-31179502	857	-38.0805	0.931165	0.698488	0.561807	30	0.510923	0.303753	31	-0.418791	16564	0.578763	1.21123	-268.9	0.607548	0	-33	0	-33	27.5	2373530	10	0.888678	1.17066	0.491638	piRNA	zebrafish	1462962046	all_zebrafish (SRR1554490-SRR1554494)
17:39770607-39772464	1857	-36.2463	0.953732	0.62081	0.552682	26	0.4982	0.279861	28	-0.0506441	12852.9	0.594507	2.41232	-627	-0.784047	0	-33	0	-33	26.5	3812791	10	1.36943	1.04764	0.393919	piRNA	zebrafish	1462962046	all_zebrafish (SRR1554490-SRR1554494)
17:39777766-39779623	1857	-36.4814	0.954026	0.616751	0.552483	26	0.495559	0.277291	28	-0.0706628	10101.9	0.602046	2.3661	-628.4	-0.81414	0	-33	0	-33	26.5	3792977	10	1.31411	1.04764	0.393489	piRNA	zebrafish	1462962046	all_zebrafish (SRR1554490-SRR1554494)
19:23436395-23437269	874	-27.6873	0.931408	0.666769	0.492822	27	0.563151	0.252606	28	1.10422	43225	0.590389	2.31103	-247.6	0.182932	0	-33	0	-33	27.5	371551	10	0.349616	0.40308	0.637646	piRNA	zebrafish	1462962046	all_zebrafish (SRR1554490-SRR1554494)
1:14552333-14554203	1870	-37.3055	0.956213	0.592136	0.551443	26	0.337222	0.340064	28	0.0223376	9658.53	0.679144	1.51363	-696.9	-1.18923	0	-33	0	-33	26.5	3558956	10	1.53988	1.46888	0.392025	piRNA	zebrafish	1462962046	all_zebrafish (SRR1554490-SRR1554494)
1:14592814-14594686	1872	-37.3104	0.957108	0.592312	0.551684	26	0.334775	0.342593	28	-0.463801	6726.46	0.678419	1.36473	-691.7	-1.06924	0	-33	0	-33	26.5	3697654	10	1.62299	1.55979	0.38841	piRNA	zebrafish	1462962046	all_zebrafish (SRR1554490-SRR1554494)
1:14625695-14626216	521	-26.995	0.948307	0.664315	0.533787	26	0.234943	0.330801	28	-0.308904	30927.8	0.65643	2.55116	-171.9	-0.705776	0	-33	0	-33	23	596130	10	1.47148	1.42672	0.441129	piRNA	zebrafish	1462962046	all_zebrafish (SRR1554490-SRR1554494)
1:14672900-14674813	1913	-36.9623	0.959442	0.602446	0.550116	26	0.467378	0.25616	28	-0.22325	7823.49	0.607423	1.08791	-619.5	-0.204574	0	-33	0	-33	26.5	3698664	10	1.54261	0.870348	0.38946	piRNA	zebrafish	1462962046	all_zebrafish (SRR1554490-SRR1554494)
1:14766695-14768610	1915	-36.6943	0.95599	0.590214	0.551958	26	0.478073	0.265478	28	-0.173858	7698.23	0.601567	1.49534	-619.5	-1.2123	0	-33	0	-33	26.5	3700154	10	1.52612	0.994412	0.391241	piRNA	zebrafish	1462962046	all_zebrafish (SRR1554490-SRR1554494)
24:17967763-17968441	678	-8.64605	0.976113	0.637413	0.531874	27	0.471132	0.318707	24	1.72687	18475.8	0.654867	1.05557	-268	-0.333333	0	-33	0	-33	27.5	228637	10	1.88701	2.5555	0.882217	piRNA	zebrafish	1462962046	all_zebrafish (SRR1554490-SRR1554494)
3:49987554-49988406	852	-21.7805	0.94183	0.816181	0.474116	28	0.683522	0.262939	30	-0.243572	5353.96	0.63615	1.63687	-257.9	-0.985521	0	-33	0	-33	28	204045	6	0.459145	0.810255	0.616895	piRNA	zebrafish	1462962046	all_zebrafish (SRR1554490-SRR1554494)
4:41681700-41682206	506	-23.015	0.905008	0.821669	0.402603	18	0.664593	0.427164	28	0.974645	54432.3	0.525692	1.39315	-100.9	-1.3979	0	-33	0	-33	27.5	174184	10	0.500769	1.20386	0.603422	piRNA	zebrafish	1462962046	all_zebrafish (SRR1554490-SRR1554494)
4:50522078-50522637	559	-23.3058	0.926186	0.839352	0.412758	27	0.681481	0.370833	28	0.233146	28703.7	0.59034	1.25036	-117.5	-1.19328	0	-33	0	-33	25.5	250926	10	0.457453	1.25378	0.566204	piRNA	zebrafish	1462962046	all_zebrafish (SRR1554490-SRR1554494)
4:56946483-56947792	1309	-38.9223	0.899255	0.62414	0.462396	19	0.67214	0.37193	28	-0.205962	32561.4	0.638656	2.25893	-370	-0.575363	0	-33	0	-33	27.5	382737	10	0.408634	0.330421	0.583017	piRNA	zebrafish	1462962046	all_zebrafish (SRR1554490-SRR1554494)
4:63872883-63873486	603	-24.0006	0.92072	0.844704	0.409279	26	0.667415	0.375673	27	0.884994	28276.5	0.577114	1.26526	-129.6	1.10145	0	-33	0	-33	23.5	249102	10	0.85892	1.35859	0.58842	piRNA	zebrafish	1462962046	all_zebrafish (SRR1554490-SRR1554494)
4:66978594-66979846	1252	-38.6934	0.900274	0.627564	0.461589	19	0.675049	0.374684	28	-0.139381	35965.2	0.651757	2.25962	-361.3	-0.50037	0	-33	0	-33	27.5	372998	10	0.34653	0.473162	0.585558	piRNA	zebrafish	1462962046	all_zebrafish (SRR1554490-SRR1554494)
4:68836551-68837769	1218	-37.6933	0.901319	0.628744	0.46332	19	0.680242	0.388225	28	-0.176924	35118.8	0.665025	2.25736	-352.7	-0.493447	0	-33	0	-33	27.5	377601	10	0.542282	0.218315	0.575033	piRNA	zebrafish	1462962046	all_zebrafish (SRR1554490-SRR1554494)
4:71704529-71706285	1756	-40.9383	0.911026	0.667031	0.454653	27	0.651526	0.336448	28	-0.199032	21966	0.669704	2.8518	-521.7	-0.274001	0	-33	0	-33	27.5	368055	10	0.558793	0.645299	0.596263	piRNA	zebrafish	1462962046	all_zebrafish (SRR1554490-SRR1554494)
5:42408473-42410343	1870	-37.377	0.956749	0.591366	0.551871	26	0.334891	0.343702	28	-0.784178	2951.62	0.68877	1.47672	-688.7	-1.02177	0	-33	0	-33	26.5	3437439	10	1.52892	1.45119	0.391539	piRNA	zebrafish	1462962046	all_zebrafish (SRR1554490-SRR1554494)
6:16871071-16871848	777	-34.7691	0.977234	0.759936	0.543805	26	0.494111	0.259746	27	0.330895	17478.9	0.661519	0.873319	-292.3	-0.561487	0	-33	0	-33	26.5	8761728	10	0.688913	0.656712	0.333528	piRNA	zebrafish	1462962046	all_zebrafish (SRR1554490-SRR1554494)
6:17178123-17178894	771	-34.6714	0.977743	0.776759	0.539372	26	0.581016	0.117368	27	0.277665	15767.9	0.581064	0.955562	-255.3	2.39012	0	-33	0	-33	26.5	9743208	10	1.50762	0.562806	0.323072	piRNA	zebrafish	1462962046	all_zebrafish (SRR1554490-SRR1554494)
6:17204458-17205527	1069	-35.0573	0.966986	0.720098	0.546486	26	0.532368	0.206308	27	-0.0350495	10720	0.596819	0.89603	-364.3	-0.143105	0	-33	0	-33	26.5	5708086	10	1.494	0.288269	0.353605	piRNA	zebrafish	1462962046	all_zebrafish (SRR1554490-SRR1554494)
6:20403452-20404521	1069	-35.1963	0.966326	0.72197	0.545248	26	0.531297	0.198686	27	0.742672	17187.4	0.615529	1.1692	-361.9	0.657596	0	-33	0	-33	26.5	6108907	10	1.63061	0.29782	0.349424	piRNA	zebrafish	1462962046	all_zebrafish (SRR1554490-SRR1554494)
6:20512927-20513698	771	-34.7488	0.977121	0.761267	0.542365	26	0.5676	0.124163	27	0.791127	20219.5	0.583658	0.883841	-262.9	1.5914	0	-33	0	-33	26.5	9478351	10	1.70613	0.231866	0.328966	piRNA	zebrafish	1462962046	all_zebrafish (SRR1554490-SRR1554494)
6:20596876-20597945	1069	-35.2397	0.96652	0.728916	0.544296	26	0.535389	0.200889	27	0.464498	15050.1	0.587465	1.12186	-357	-0.802955	0	-33	0	-33	26.5	6107975	10	1.28224	0.32154	0.346205	piRNA	zebrafish	1462962046	all_zebrafish (SRR1554490-SRR1554494)
7:5720156-5724298	4142	-40.5311	0.924074	0.655183	0.470733	26	0.535753	0.428571	28	0.921709	21436.2	0.614196	2.40237	-1260.9	-1.40962	0	-33	0	-33	28	135508	10	-0.282058	0.252199	0.744296	piRNA	zebrafish	1462962046	all_zebrafish (SRR1554490-SRR1554494)
8:45059793-45060673	880	-25.6907	0.92799	0.68567	0.4456	27	0.513081	0.292073	21	-0.556005	5857.09	0.647727	2.23041	-265	1.1124	0	-33	0	-33	27.5	955096	10	0.367678	1.0407	0.616556	piRNA	zebrafish	1462962046	all_zebrafish (SRR1554490-SRR1554494)
8:45492826-45493394	568	-19.3306	0.927372	0.716495	0.497955	27	0.524914	0.35567	30	-0.309219	8591.07	0.612676	1.53322	-186.4	-0.471405	0	-33	0	-33	29.5	272337	10	-0.211633	1.71209	0.7689	piRNA	zebrafish	1462962046	all_zebrafish (SRR1554490-SRR1554494)
KN149690.1:61458-62677	1219	-37.678	0.899616	0.624251	0.464455	19	0.6729	0.375603	28	-0.101913	37545.7	0.636587	2.26607	-348.1	-0.898155	0	-33	0	-33	27.5	390650	10	0.556929	0.472531	0.570343	piRNA	zebrafish	1462962046	all_zebrafish (SRR1554490-SRR1554494)
KN149694.1:44538-45119	581	-17.9245	0.939006	0.797372	0.446346	26	0.652835	0.316044	21	-0.584467	1383.13	0.664372	2.375	-218.8	-0.471405	0	-33	0	-33	27.5	2097510	10	0.00910419	2.77507	0.581604	piRNA	zebrafish	1462962046	all_zebrafish (SRR1554490-SRR1554494)
KZ116067.1:31289-32060	771	-34.8747	0.976085	0.767401	0.54235	26	0.576164	0.130305	27	1.32659	29652.1	0.601816	0.9323	-272.8	1.85318	0	-33	0	-33	26.5	9241566	10	1.39035	0.305688	0.336386	piRNA	zebrafish	1462962046	all_zebrafish (SRR1554490-SRR1554494)
Scaffold1221:1301-8325	7024	-57.3013	0.929448	0.650092	0.429631	30	0.274682	0.394592	30	0.354435	382651	0.607631	0.935074	-1783.19	0.111427	0	-33	0	-33	30.5	5027802	10	0.709122	0.315281	0.187375	piRNA	whitefly	1390651722	all.bam
Scaffold161:2210677-2242663	31986	-57.5404	0.9399	0.950426	0.43713	30	0.745513	0.367043	20	0.238122	325359	0	-33	0	-33	0	-33	0	-33	30.5	1099474	10	1.82341	1.4046	0.0962416	piRNA	whitefly	1390651722	all.bam
Scaffold185:9660-17037	7377	-54.1561	0.914784	0.894118	0.477305	29	0.736085	0.22372	23	0.679493	199276	0.618138	2.5695	-2168.2	0.394003	0	-33	0	-33	26.5	696088	10	0.120027	0.231266	0.15128	piRNA	whitefly	1390651722	all.bam
Scaffold2250:239602-243311	3709	-52.535	0.937478	0.908074	0.388898	29	0.772548	0.339888	31	0.632821	445593	0.613103	2.47855	-908.1	0.0894303	0	-33	0	-33	30.5	4775909	10	0.681293	0.143936	0.12013	piRNA	whitefly	1390651722	all.bam
Scaffold226:4034548-4039559	5011	-55.9904	0.913954	0.930335	0.435855	29	0.685352	0.328782	31	0.135691	1994327	0.642985	1.83978	-1480.5	0.270464	0	-33	0	-33	27	5477803	10	1.42497	0.570651	0.0887394	piRNA	whitefly	1390651722	all.bam
Scaffold2366:1323372-1372418	49046	-61.1594	0.936239	0.961593	0.482487	30	0.73138	0.292714	30	0.151652	104167	0	-33	0	-33	0	-33	0	-33	30.5	1888213	10	1.20123	0.837919	0.135164	piRNA	whitefly	1390651722	all.bam
Scaffold2666:2139991-2161194	21203	-62.1074	0.947446	0.972539	0.415903	29	0.810118	0.273847	30	0.00914504	152484	0	-33	0	-33	0	-33	0	-33	30.5	534175	10	0.783066	0.134854	0.152171	piRNA	whitefly	1390651722	all.bam
Scaffold297:5536269-5538411	2142	-53.2171	0.913703	0.911719	0.410934	30	0.693438	0.249564	23	0.503171	1307651	0.618114	2.17239	-618.1	-0.70957	0	-33	0	-33	23	1276998	10	1.22911	0.478796	0.13707	piRNA	whitefly	1390651722	all.bam
Scaffold300:230757-242753	11996	-58.0005	0.92935	0.904337	0.452247	30	0.264352	0.303879	30	0.409409	1118429	0	-33	0	-33	0	-33	0	-33	30.5	2397029	10	0.887153	0.354353	0.11978	piRNA	whitefly	1390651722	all.bam
Scaffold42821:38-1638	1600	-41.5346	0.945365	0.852565	0.552361	29	0.387306	0.577533	23	0.521744	286419	0.51125	0.519657	-492.81	0.820913	0	-33	0	-33	28	44321237	10	0.710145	0.641997	0.0928332	piRNA	whitefly	1390651722	all.bam
Scaffold4845:662396-680192	17796	-57.2458	0.935136	0.956172	0.435671	29	0.777516	0.317858	31	0.645818	199337	0	-33	0	-33	0	-33	0	-33	30.5	1363005	10	0.732716	0.363194	0.128249	piRNA	whitefly	1390651722	all.bam
Scaffold50048:33-1634	1601	-48.6317	0.947101	0.575435	0.459764	29	0.258514	0.538819	30	0.187487	488212	0.519675	1.27623	-378.2	-1.89125	0	-33	0	-33	30.5	4703144	10	0.640583	0.762083	0.237795	piRNA	whitefly	1390651722	all.bam
Scaffold545:1815130-1825877	10747	-58.0346	0.917137	0.926684	0.490003	29	0.667499	0.29945	30	0.377435	89186.9	0	-33	0	-33	0	-33	0	-33	30	1945173	10	1.37375	1.51284	0.162169	piRNA	whitefly	1390651722	all.bam
Scaffold607:661609-667808	6199	-60.7503	0.916362	0.955062	0.476507	30	0.168939	0.411853	31	0.554976	174739	0.59687	2.4029	-1580.7	-33	0	-33	0	-33	27	810166	13	1.00752	-0.417759	0.155929	piRNA	whitefly	1390651722	all.bam
Scaffold650:982770-985518	2748	-35.5573	0.917479	0.797596	0.354097	30	0.269018	0.358691	30	0.006667	30153.7	0.580058	2.58526	-586.7	-1.27783	0	-33	0	-33	31	111746	10	1.02106	0.879769	0.324202	piRNA	whitefly	1390651722	all.bam
NT_033778.4:6169608-6169680	72	-4.65063	0.850357	0.996269	0.50277	20	0.205224	0.317164	-33	-0.333333	0	0.583333	2.54183	-21.9	-0.333333	0.46	2.66667	-27.5	1.15184	21	7462.69	29	1.69313	1.64533	0.320896	rRNA	dmel	192595761	ovary_v097
NC_004354.4:23214396-23217234	2838	-36.8503	0.937196	0.89222	0.449755	20	0.172288	0.337884	19	-0.0160245	405.318	0.627907	3.14048	-794.4	2.41687	0	-33	0	-33	26.5	3720.39	10	1.55032	2.61383	0.041095	rRNA	dmel	192595761	ovary_v097
NC_004354.4:23239308-23241639	2331	-34.7837	0.973949	0.538938	0.480731	19	0.201832	0.237133	26	0.00809366	1320.21	0.649507	3.12052	-742.9	-1.31659	0	-33	0	-33	25	554309	10	1.41054	1.19085	0.0726516	rRNA	dmel	192595761	ovary_v097
NC_004354.4:23261544-23262901	1357	-34.0398	0.938199	0.833194	0.496971	19	0.232295	0.300117	19	-0.77985	355.198	0.57185	3.02181	-349.6	-0.888889	0	-33	0	-33	25.5	6917.9	27	1.18768	1.59088	0.0725787	rRNA	dmel	192595761	ovary_v097
NC_004354.4:23270758-23271242	484	-21.4026	0.981391	0.893735	0.410148	25	0.238627	0.478953	21	-0.119323	1242.73	0.533058	0.904497	-96.8	0.234082	0	-33	0	-33	25.5	13557	10	1.3393	1.68316	0.0493137	rRNA	dmel	192595761	ovary_v097
NC_004354.4:23277868-23283844	5976	-36.9369	0.95732	0.890393	0.409766	22	0.299973	0.369335	20	0.390826	65.671	0.587684	2.67054	-1374.9	-0.443941	0	-33	0	-33	22.5	3364.86	10	0.719647	0.802142	0.0441715	rRNA	dmel	192595761	ovary_v097
NC_004354.4:23200802-23201057	255	-16.5631	0.89592	0.9999	0.556942	20	0.187981	0.217578	26	0.134687	144.367	0.627451	3.02415	-60.2	0.0543878	0.648649	-0.536976	-30.2	1.82986	20	288.734	18	-1.11226	-0.421919	0.0243114	rRNA	dmel	283063946	bonini_head_3d_wt SRR1042403
NC_004354.4:23205258-23205381	123	-14.9188	0.866478	1	0.51727	18	0.1752	0.2386	-33	-33	0	0.552845	2.5123	-33.1	-33	0.590476	1.9925	-28.7	0.235993	-33	-33	-33	0.623936	1.30105	0.0126232	rRNA	dmel	283063946	bonini_head_3d_wt SRR1042404
NC_004354.4:23205409-23205439	30	-1.15607	0.922975	1	0.471993	30	0.957209	0.0119184	-33	-33	0	0.533333	2.71068	NA	-33	0	-33	0	-33	-33	-33	-33	2.77716	-33	0.00703619	rRNA	dmel	283063946	bonini_head_3d_wt SRR1042405
NC_004354.4:23205822-23206526	704	-25.8263	0.971257	1	0.417372	25	0.0851	0.4773	-33	-33	0	0.625	2.58213	-171.7	-0.666667	0	-33	0	-33	-33	-33	-33	1.53924	1.20201	0.0340834	rRNA	dmel	283063946	bonini_head_3d_wt SRR1042406
NC_004354.4:23211192-23213167	1975	-36.7387	0.878639	0.998702	0.491511	18	0.206332	0.193748	24.5	-0.496139	4.51918	0.651139	3.16943	-596.9	-0.970371	0	-33	0	-33	21.5	207.882	5	0.109587	-0.176714	0.0443648	rRNA	dmel	283063946	bonini_head_3d_wt SRR1042407
NC_004354.4:23213889-23214012	123	-12.817	0.814382	1	0.513384	18	0.0935	0.1687	-33	-33	0	0.585366	2.38265	-34.2	-33	0.510638	-0.503945	0	-0.0324988	-33	-33	-33	-1.1385	0.480531	0.00705079	rRNA	dmel	283063946	bonini_head_3d_wt SRR1042408
NC_004354.4:23214040-23214070	30	-1.15607	0.922975	1	0.471993	30	0.957209	0.0119184	-33	-33	0	0.533333	2.71068	NA	-33	0	-33	0	-33	-33	-33	-33	2.77716	-33	0.00703619	rRNA	dmel	283063946	bonini_head_3d_wt SRR1042409
NC_004354.4:23214452-23217141	2689	-36.3334	0.913458	0.9994	0.47802	24	0.145113	0.327204	26	-0.800327	0	0.626999	3.15435	-758	1.26665	0	-33	0	-33	24	24.9857	6	0.845774	0.734213	0.0283388	rRNA	dmel	283063946	bonini_head_3d_wt SRR1042410
NC_004354.4:23239718-23240976	1258	-37.4558	0.90038	0.999101	0.506958	22	0.171146	0.238485	23	2.66384	680.08	0.645469	2.85436	-367.8	0.902014	0	-33	0	-33	21	829.366	24	-0.0298575	0.0893901	0.0316597	rRNA	dmel	283063946	bonini_head_3d_wt SRR1042411
NC_004354.4:23261772-23262667	895	-35.8788	0.904994	0.999101	0.523967	19	0.107403	0.24408	23	2.66167	1234.14	0.592179	2.76937	-221.3	-33	0	-33	0	-33	21.5	666.57	24	1.64533	0.53701	0.030022	rRNA	dmel	283063946	bonini_head_3d_wt SRR1042412
NC_004354.4:23270802-23271159	357	-20.113	0.930901	1	0.415952	25	0.1115	0.2788	-33	-33	0	0	1.05145	-65.1	1.23691	0	-33	0	-33	-33	-33	-33	1.74072	1.266	0.0290973	rRNA	dmel	283063946	bonini_head_3d_wt SRR1042413
NC_004354.4:23278007-23280011	2004	-36.6039	0.931365	0.9997	0.482197	22	0.13496	0.290113	22	-0.333333	0	0.556886	3.16055	-448.5	-33	0	-33	0	-33	24	24.4371	6	0.0276495	-0.322877	0.0285303	rRNA	dmel	283063946	bonini_head_3d_wt SRR1042414
NC_004354.4:23278007-23283732	5725	-36.733	0.89492	0.998104	0.489825	22	0.122767	0.269787	25	-0.203331	1.95047	0.589345	3.07853	-1317.7	-0.333333	0	-33	0	-33	21.5	37.0589	5	0.55374	0.530583	0.0327386	rRNA	dmel	283063946	bonini_head_3d_wt SRR1042415
NC_004354.4:23280155-23280278	123	-14.9333	0.866471	1	0.517315	18	0.1606	0.0465	-33	-33	0	0	2.49254	-30.6	-0.321959	0.654206	0.727589	-28.7	0.232943	-33	-33	-33	1.26493	1.13559	0.0126647	rRNA	dmel	283063946	bonini_head_3d_wt SRR1042416
NC_004354.4:23280998-23282932	1934	-37.0914	0.872031	0.998901	0.496802	18	0.113675	0.304165	26	0	15.5137	0.572906	3.04044	-486.8	-0.333333	0	-33	0	-33	21.5	155.137	5	0.453848	0.337352	0.0451088	rRNA	dmel	283063946	bonini_head_3d_wt SRR1042417
NC_004354.4:23291549-23291672	123	-14.5679	0.821008	1	0.51488	18	0.0989	0.1719	-33	-33	0	0.552845	2.37649	-34.2	-33	0.391304	-0.606655	0	-0.0326017	-33	-33	-33	0.170724	0.288757	0.00922821	rRNA	dmel	283063946	bonini_head_3d_wt SRR1042418
NC_004354.4:23291700-23291730	30	-5.68463	0.926995	1	0.438032	30	0.9559	0.0101	-33	-33	0	0.533333	2.57273	NA	-33	0	-33	0	-33	-33	-33	-33	3.01891	-33	3.05086e-05	rRNA	dmel	283063946	bonini_head_3d_wt SRR1042419
NC_024511.2:12735-14059	1324	-12.2759	0.925528	0.999141	0.388872	20	0.280069	0.35567	24	-0.333333	0	0	2.7842	-166	-33	0	-33	0	-33	20	4295.53	10	0.988525	0.592426	0.496564	rRNA	dmel	283063946	bonini_head_3d_wt SRR1042420
NC_024511.2:14131-14917	786	-9.85792	0.913207	1	0.362419	19	0.201177	0.391765	-33	-33	0	0	3.13129	-92.9	-0.659644	0	-33	0	-33	-33	-33	-33	-0.70222	2.1478	0.491765	rRNA	dmel	283063946	bonini_head_3d_wt SRR1042421
NT_033777.3:19861610-19862601	991	-3.42182	0.925169	0.722222	0.327543	21	0.277778	0.166667	19	-33	0	0.672048	2.77716	-324.1	2.66667	0	-33	0	-33	-33	-33	-33	-33	-33	0.777778	rRNA	dmel	283063946	bonini_head_3d_wt SRR1042422
NT_033778.4:19729562-19729697	135	-12.3131	0.854745	0.996314	0.591724	18	0.0283949	0.622995	22	1.811	14907.9	0.533333	3.23337	-38.5	-0.471405	0.690476	-0.333333	-31.1	2.34232	21	3273.54	6	0.448947	1.71453	0.012497	rRNA	dmel	283063946	bonini_head_3d_wt SRR1042423
NT_033778.4:19729921-19730056	135	-14.1973	0.867331	0.997009	0.594926	18	0.0247258	0.660618	22	1.9758	8978.57	0.518518	3.24108	-38.4	-0.471405	0.674419	-33	-29.6	-33	20.5	2276.26	23	0.681355	1.27515	0.014055	rRNA	dmel	283063946	bonini_head_3d_wt SRR1042424
NT_033778.4:19730304-19730439	135	-12.8669	0.86274	0.996314	0.595071	18	0.0251071	0.662349	22	1.81212	8735.79	0.518518	3.26789	-38.4	-0.471405	0.682353	-0.333333	-26.2	2.34275	20.5	2002.75	6	0.448947	1.71453	0.0117304	rRNA	dmel	283063946	bonini_head_3d_wt SRR1042425
NT_033778.4:19730670-19730805	135	-12.0957	0.934071	0.996512	0.571127	21	0.0553064	0.380668	22	1.82531	39885.8	0.488889	2.07103	-37.8	-33	0.682353	-0.333333	-27.9	2.33532	21	9374.87	6	0.47844	1.71453	0.0227554	rRNA	dmel	283063946	bonini_head_3d_wt SRR1042426
NT_033778.4:19731043-19731178	135	-12.8669	0.86274	0.996314	0.595071	18	0.0251071	0.662349	22	1.81212	8735.79	0.518518	3.26789	-38.4	-0.471405	0.682353	-0.333333	-26.2	2.34275	20.5	2002.75	6	0.448947	1.71453	0.0117304	rRNA	dmel	283063946	bonini_head_3d_wt SRR1042427
NT_033778.4:19731409-19731544	135	-12.8669	0.86274	0.996314	0.595071	18	0.0251071	0.662349	22	1.81212	8735.79	0.518518	3.26789	-38.4	-0.471405	0.682353	-0.333333	-26.2	2.34275	20.5	2002.75	6	0.448947	1.71453	0.0117304	rRNA	dmel	283063946	bonini_head_3d_wt SRR1042428
NT_033778.4:19731768-19731903	135	-14.2852	0.867232	0.996512	0.594916	18	0.0247135	0.660389	22	1.94287	9591.94	0.518518	3.24661	-38.4	-0.471405	0.589474	0.54573	-31.1	2.34954	20.5	2294.12	6	0.681355	1.27515	0.0141079	rRNA	dmel	283063946	bonini_head_3d_wt SRR1042429
NT_033778.4:19732170-19732305	135	-14.2852	0.867232	0.996512	0.594916	18	0.0247135	0.660389	22	1.94287	9591.94	0.518518	3.24661	-38.4	-0.471405	0.589474	0.54573	-31.1	2.34954	20.5	2294.12	6	0.681355	1.27515	0.0141079	rRNA	dmel	283063946	bonini_head_3d_wt SRR1042430
NT_033778.4:19732550-19732685	135	-12.0957	0.934071	0.996512	0.571127	21	0.0553064	0.380668	22	1.82531	39885.8	0.488889	2.07103	-37.8	-33	0.682353	-0.333333	-27.9	2.33532	21	9374.87	6	0.47844	1.71453	0.0227554	rRNA	dmel	283063946	bonini_head_3d_wt SRR1042431
NT_033778.4:19732926-19733061	135	-12.4344	0.861112	0.99681	0.596358	18	0.0218301	0.665072	22	1.89442	9309.62	0.518518	3.25076	-38.4	-0.471405	0.592593	-0.333333	-31.1	2.34578	21	2228.26	6	0.687912	2.1731	0.0113302	rRNA	dmel	283063946	bonini_head_3d_wt SRR1042432
NT_033778.4:19733288-19733423	135	-13.3026	0.861468	0.997009	0.593936	18	0.0281156	0.709372	22	1.83852	9339.14	0.503704	3.24034	-38.1	-33	0.506667	-0.340334	-32.2	0.881906	21	2493.07	30	0.423433	0.474521	0.0118124	rRNA	dmel	283063946	bonini_head_3d_wt SRR1042433
NT_033778.4:19733671-19733806	135	-12.7622	0.862968	0.997108	0.595161	18	0.0260245	0.664074	22	1.79095	9312.44	0.548148	3.24085	-39.3	-0.471405	0.568807	-0.333333	-30.7	2.38648	21	2328.11	23	0.472814	1.71453	0.0116596	rRNA	dmel	283063946	bonini_head_3d_wt SRR1042434
NT_033778.4:19734037-19734172	135	-12.7872	0.863153	0.99691	0.595143	18	0.024524	0.663244	22	1.92217	8969.12	0.518518	3.24427	-38.2	-0.471405	0.522727	-0.333333	-32.2	2.37981	20.5	2366.32	23	0.453282	1.71453	0.0116408	rRNA	dmel	283063946	bonini_head_3d_wt SRR1042435
NT_033778.4:19734396-19734531	135	-13.3026	0.861468	0.997009	0.593936	18	0.0281156	0.709372	22	1.83852	9339.14	0.503704	3.24034	-38.1	-33	0.506667	-0.340334	-32.2	0.881906	21	2493.07	30	0.423433	0.474521	0.0118124	rRNA	dmel	283063946	bonini_head_3d_wt SRR1042436
NT_033778.4:19734772-19734907	135	-12.8669	0.86274	0.996314	0.595071	18	0.0251071	0.662349	22	1.81212	8735.79	0.518518	3.26789	-38.4	-0.471405	0.682353	-0.333333	-26.2	2.34275	20.5	2002.75	6	0.448947	1.71453	0.0117304	rRNA	dmel	283063946	bonini_head_3d_wt SRR1042437
NT_033778.4:19735141-19735276	135	-14.2852	0.867232	0.996512	0.594916	18	0.0247135	0.660389	22	1.94287	9591.94	0.518518	3.24661	-38.4	-0.471405	0.589474	0.54573	-31.1	2.34954	20.5	2294.12	6	0.681355	1.27515	0.0141079	rRNA	dmel	283063946	bonini_head_3d_wt SRR1042438
NT_033778.4:19735510-19735645	135	-14.2852	0.867232	0.996512	0.594916	18	0.0247135	0.660389	22	1.94287	9591.94	0.518518	3.24661	-38.4	-0.471405	0.589474	0.54573	-31.1	2.34954	20.5	2294.12	6	0.681355	1.27515	0.0141079	rRNA	dmel	283063946	bonini_head_3d_wt SRR1042439
NT_033778.4:19735879-19736014	135	-14.2852	0.867232	0.996512	0.594916	18	0.0247135	0.660389	22	1.94287	9591.94	0.518518	3.24661	-38.4	-0.471405	0.589474	0.54573	-31.1	2.34954	20.5	2294.12	6	0.681355	1.27515	0.0141079	rRNA	dmel	283063946	bonini_head_3d_wt SRR1042440
NT_033778.4:19736248-19736383	135	-14.2852	0.867232	0.996512	0.594916	18	0.0247135	0.660389	22	1.94287	9591.94	0.518518	3.24661	-38.4	-0.471405	0.589474	0.54573	-31.1	2.34954	20.5	2294.12	6	0.681355	1.27515	0.0141079	rRNA	dmel	283063946	bonini_head_3d_wt SRR1042441
NT_033778.4:19736617-19736752	135	-14.2852	0.867232	0.996512	0.594916	18	0.0247135	0.660389	22	1.94287	9591.94	0.518518	3.24661	-38.4	-0.471405	0.589474	0.54573	-31.1	2.34954	20.5	2294.12	6	0.681355	1.27515	0.0141079	rRNA	dmel	283063946	bonini_head_3d_wt SRR1042442
NT_033778.4:19736986-19737121	135	-12.6349	0.864091	0.996512	0.595376	18	0.0242153	0.667663	22	1.74076	8178.55	0.622222	3.26114	-40.5	-0.471405	0.577778	-0.333333	-27.9	2.33532	21	2101.96	6	0.463003	1.71453	0.0111786	rRNA	dmel	283063946	bonini_head_3d_wt SRR1042443
NT_033778.4:19737355-19737490	135	-14.2852	0.867232	0.996512	0.594916	18	0.0247135	0.660389	22	1.94287	9591.94	0.518518	3.24661	-38.4	-0.471405	0.589474	0.54573	-31.1	2.34954	20.5	2294.12	6	0.681355	1.27515	0.0141079	rRNA	dmel	283063946	bonini_head_3d_wt SRR1042444
NT_033778.4:19737724-19737859	135	-14.2852	0.867232	0.996512	0.594916	18	0.0247135	0.660389	22	1.94287	9591.94	0.518518	3.24661	-38.4	-0.471405	0.589474	0.54573	-31.1	2.34954	20.5	2294.12	6	0.681355	1.27515	0.0141079	rRNA	dmel	283063946	bonini_head_3d_wt SRR1042445
NT_033778.4:19738086-19738221	135	-14.2852	0.867232	0.996512	0.594916	18	0.0247135	0.660389	22	1.94287	9591.94	0.518518	3.24661	-38.4	-0.471405	0.589474	0.54573	-31.1	2.34954	20.5	2294.12	6	0.681355	1.27515	0.0141079	rRNA	dmel	283063946	bonini_head_3d_wt SRR1042446
NT_033778.4:19738452-19738587	135	-11.1763	0.8591	0.998702	0.608244	18	0.021572	0.706681	20	1.63002	278.665	0.518518	3.24762	-38.2	-0.333333	0.588235	-0.348325	-27.4	0.814142	25	1500.5	29	-0.0170303	1.64533	0.0094103	rRNA	dmel	283063946	bonini_head_3d_wt SRR1042447
NT_033778.4:19738818-19738953	135	-12.8669	0.86274	0.996314	0.595071	18	0.0251071	0.662349	22	1.81212	8735.79	0.518518	3.26789	-38.4	-0.471405	0.682353	-0.333333	-26.2	2.34275	20.5	2002.75	6	0.448947	1.71453	0.0117304	rRNA	dmel	283063946	bonini_head_3d_wt SRR1042448
NT_033778.4:19739194-19739329	135	-14.2852	0.867232	0.996512	0.594916	18	0.0247135	0.660389	22	1.94287	9591.94	0.518518	3.24661	-38.4	-0.471405	0.589474	0.54573	-31.1	2.34954	20.5	2294.12	6	0.681355	1.27515	0.0141079	rRNA	dmel	283063946	bonini_head_3d_wt SRR1042449
NT_033778.4:19739570-19739705	135	-14.2852	0.867232	0.996512	0.594916	18	0.0247135	0.660389	22	1.94287	9591.94	0.518518	3.24661	-38.4	-0.471405	0.589474	0.54573	-31.1	2.34954	20.5	2294.12	6	0.681355	1.27515	0.0141079	rRNA	dmel	283063946	bonini_head_3d_wt SRR1042450
NT_033778.4:19739936-19740071	135	-14.2852	0.867232	0.996512	0.594916	18	0.0247135	0.660389	22	1.94287	9591.94	0.518518	3.24661	-38.4	-0.471405	0.589474	0.54573	-31.1	2.34954	20.5	2294.12	6	0.681355	1.27515	0.0141079	rRNA	dmel	283063946	bonini_head_3d_wt SRR1042451
NT_033778.4:19740305-19740440	135	-12.4344	0.861112	0.99681	0.596358	18	0.0218301	0.665072	22	1.89442	9309.62	0.518518	3.25076	-38.4	-0.471405	0.592593	-0.333333	-31.1	2.34578	21	2228.26	6	0.687912	2.1731	0.0113302	rRNA	dmel	283063946	bonini_head_3d_wt SRR1042452
NT_033778.4:19740664-19740799	135	-12.8669	0.86274	0.996314	0.595071	18	0.0251071	0.662349	22	1.81212	8735.79	0.518518	3.26789	-38.4	-0.471405	0.682353	-0.333333	-26.2	2.34275	20.5	2002.75	6	0.448947	1.71453	0.0117304	rRNA	dmel	283063946	bonini_head_3d_wt SRR1042453
NT_033778.4:19741040-19741175	135	-14.2852	0.867232	0.996512	0.594916	18	0.0247135	0.660389	22	1.94287	9591.94	0.518518	3.24661	-38.4	-0.471405	0.589474	0.54573	-31.1	2.34954	20.5	2294.12	6	0.681355	1.27515	0.0141079	rRNA	dmel	283063946	bonini_head_3d_wt SRR1042454
Dsim_2L:1302170-1303824	1654	-8.45103	0.666171	0.553571	0.516425	18	0.0714286	0.0892857	-33	-33	0	0.622733	2.71237	-598.5	-33	0	-33	0	-33	23	35714.3	NA	-33	-33	0.714286	rRNA	dsim	8530425	wxd1_rep1
Dsim_2L:1875950-1876945	995	-4.93096	0.755298	0.772727	0.295511	18	0.454545	0.545454	-33	-0.333333	0	0.611055	2.60374	-294.6	-33	0	-33	0	-33	21	136364	23	1.64533	-33	0.681818	rRNA	dsim	8530425	wxd1_rep1
Dsim_2L:9971008-9971877	869	-7.5792	0.686409	0.784615	0.368317	18	0.384615	0.184615	21	2.46059	76923.1	0.589183	2.40464	-224.4	-33	0	-33	0	-33	21	123077	16	2.90856	-33	0.523077	rRNA	dsim	8530425	wxd1_rep1
Dsim_2L:21480072-21480250	178	-35.9263	0.970695	0.999301	0.448515	26	0.684621	0.0289797	20	-33	0	0.651685	2.44654	-49.8	-0.249774	0.550459	-33	-28.1	-33	23	1058.85	8	0.501517	0.284266	0.00708498	rRNA	dsim	8530425	wxd1_rep1
Dsim_2R:6146961-6148995	2034	-10.6817	0.718716	0.814751	0.243573	18	0.754717	0.751286	-33	-0.333333	0	0.60767	2.55947	-556.2	-33	0	-33	0	-33	19	34305.3	4	2.73274	-33	0.116638	rRNA	dsim	8530425	wxd1_rep1
Dsim_2R:6147436-6148995	1559	-9.08376	0.744802	0.590361	0.297741	18	0.253012	0.216867	-33	-0.333333	0	0.602951	2.55992	-430.5	-33	0	-33	0	-33	19	120482	4	2.73274	-33	0.295181	rRNA	dsim	8530425	wxd1_rep1
Dsim_2R:10612104-10615203	3099	-11.0058	0.82498	0.658683	0.524098	19	0.0538922	0.443114	22	0.386159	29940.1	0.584059	2.55715	-900.5	-33	0	-33	0	-33	-33	-33	-33	1.64533	-33	0.60479	rRNA	dsim	8530425	wxd1_rep1
Dsim_2R:12727664-12729691	2027	-10.1319	0.742574	0.744828	0.283789	18	0.17931	0.613793	21	-0.611775	0	0.637395	3.00667	-589.7	-0.333333	0	-33	0	-33	21.5	13793.1	14	3.04123	-33	0.655172	rRNA	dsim	8530425	wxd1_rep1
Dsim_2R:17768100-17768218	118	-7.1895	0.969101	0.999509	0.556685	23	0.0235525	0.499509	23	0.751241	50703.3	0.525424	2.38504	-37.7	-33	0.214286	0.202472	0	2.2007	26	981.354	24	2.69768	-33	0.0729473	rRNA	dsim	8530425	wxd1_rep1
Dsim_2R:17779225-17779343	118	-12.2409	0.966758	0.999419	0.55453	23	0.030805	0.476606	23	0.903196	50857.3	0.59322	2.87814	-38.5	-33	0.5	-33	-15.8	-33	26	871.84	24	1.83234	-33	0.122057	rRNA	dsim	8530425	wxd1_rep1
Dsim_2R:17779598-17779716	118	-12.2409	0.966758	0.999419	0.55453	23	0.030805	0.476606	23	0.903196	50857.3	0.59322	2.87814	-38.5	-33	0.5	-33	-15.8	-33	26	871.84	24	1.83234	-33	0.122057	rRNA	dsim	8530425	wxd1_rep1
Dsim_2R:17779978-17780096	118	-11.267	0.967196	0.999411	0.554769	23	0.0296067	0.477832	23	0.761458	47135.1	0.59322	2.87814	-38.5	-33	0.571429	-33	-10.3	-33	26	883.783	24	1.9654	-33	0.110326	rRNA	dsim	8530425	wxd1_rep1
Dsim_2R:17780351-17780469	118	-12.2409	0.966758	0.999419	0.55453	23	0.030805	0.476606	23	0.903196	50857.3	0.59322	2.87814	-38.5	-33	0.5	-33	-15.8	-33	26	871.84	24	1.83234	-33	0.122057	rRNA	dsim	8530425	wxd1_rep1
Dsim_2R:17780724-17780842	118	-12.2409	0.966758	0.999419	0.55453	23	0.030805	0.476606	23	0.903196	50857.3	0.59322	2.87814	-38.5	-33	0.5	-33	-15.8	-33	26	871.84	24	1.83234	-33	0.122057	rRNA	dsim	8530425	wxd1_rep1
Dsim_2R:17781097-17781215	118	-12.2409	0.966758	0.999419	0.55453	23	0.030805	0.476606	23	0.903196	50857.3	0.59322	2.87814	-38.5	-33	0.5	-33	-15.8	-33	26	871.84	24	1.83234	-33	0.122057	rRNA	dsim	8530425	wxd1_rep1
Dsim_2R:17781470-17781588	118	-12.2409	0.966758	0.999419	0.55453	23	0.030805	0.476606	23	0.903196	50857.3	0.59322	2.87814	-38.5	-33	0.5	-33	-15.8	-33	26	871.84	24	1.83234	-33	0.122057	rRNA	dsim	8530425	wxd1_rep1
Dsim_2R:17781850-17781968	118	-11.267	0.967196	0.999411	0.554769	23	0.0296067	0.477832	23	0.761458	47135.1	0.59322	2.87814	-38.5	-33	0.571429	-33	-10.3	-33	26	883.783	24	1.9654	-33	0.110326	rRNA	dsim	8530425	wxd1_rep1
Dsim_2R:17782223-17782341	118	-12.2409	0.966758	0.999419	0.55453	23	0.030805	0.476606	23	0.903196	50857.3	0.59322	2.87814	-38.5	-33	0.5	-33	-15.8	-33	26	871.84	24	1.83234	-33	0.122057	rRNA	dsim	8530425	wxd1_rep1
Dsim_2R:17782596-17782714	118	-12.2409	0.966758	0.999419	0.55453	23	0.030805	0.476606	23	0.903196	50857.3	0.59322	2.87814	-38.5	-33	0.5	-33	-15.8	-33	26	871.84	24	1.83234	-33	0.122057	rRNA	dsim	8530425	wxd1_rep1
Dsim_2R:17782969-17783087	118	-12.1007	0.966896	0.999413	0.554098	23	0.0303831	0.472479	23	0.781944	49611	0.644068	2.87814	-41.1	-33	0.508475	-33	-13.4	-33	26	293.556	24	1.65823	-33	0.1139	rRNA	dsim	8530425	wxd1_rep1
Dsim_2R:17783335-17783453	118	-12.2409	0.966758	0.999419	0.55453	23	0.030805	0.476606	23	0.903196	50857.3	0.59322	2.87814	-38.5	-33	0.5	-33	-15.8	-33	26	871.84	24	1.83234	-33	0.122057	rRNA	dsim	8530425	wxd1_rep1
Dsim_2R:17783715-17783833	118	-11.267	0.967196	0.999411	0.554769	23	0.0296067	0.477832	23	0.761458	47135.1	0.59322	2.87814	-38.5	-33	0.571429	-33	-10.3	-33	26	883.783	24	1.9654	-33	0.110326	rRNA	dsim	8530425	wxd1_rep1
Dsim_2R:17784088-17784206	118	-12.2409	0.966758	0.999419	0.55453	23	0.030805	0.476606	23	0.903196	50857.3	0.59322	2.87814	-38.5	-33	0.5	-33	-15.8	-33	26	871.84	24	1.83234	-33	0.122057	rRNA	dsim	8530425	wxd1_rep1
Dsim_2R:17784447-17784565	118	-11.267	0.967196	0.999411	0.554769	23	0.0296067	0.477832	23	0.761458	47135.1	0.627119	2.87814	-39.6	-33	0.507937	-33	-11.7	-33	26	883.783	24	1.9654	-33	0.110326	rRNA	dsim	8530425	wxd1_rep1
Dsim_2R:17784820-17784938	118	-12.2409	0.966758	0.999419	0.55453	23	0.030805	0.476606	23	0.903196	50857.3	0.59322	2.87814	-38.5	-33	0.5	-33	-15.8	-33	26	871.84	24	1.83234	-33	0.122057	rRNA	dsim	8530425	wxd1_rep1
Dsim_2R:17785179-17785297	118	-11.267	0.967196	0.999411	0.554769	23	0.0296067	0.477832	23	0.761458	47135.1	0.627119	2.87814	-39.6	-33	0.507937	-33	-11.7	-33	26	883.783	24	1.9654	-33	0.110326	rRNA	dsim	8530425	wxd1_rep1
Dsim_2R:17785552-17785670	118	-12.2409	0.966758	0.999419	0.55453	23	0.030805	0.476606	23	0.903196	50857.3	0.59322	2.87814	-38.5	-33	0.5	-33	-15.8	-33	26	871.84	24	1.83234	-33	0.122057	rRNA	dsim	8530425	wxd1_rep1
Dsim_2R:17785925-17786043	118	-12.2409	0.966758	0.999419	0.55453	23	0.030805	0.476606	23	0.903196	50857.3	0.59322	2.87814	-38.5	-33	0.5	-33	-15.8	-33	26	871.84	24	1.83234	-33	0.122057	rRNA	dsim	8530425	wxd1_rep1
Dsim_2R:17786433-17786551	118	-11.267	0.967196	0.999411	0.554769	23	0.0296067	0.477832	23	0.761458	47135.1	0.627119	2.87814	-39.6	-33	0.507937	-33	-11.7	-33	26	883.783	24	1.9654	-33	0.110326	rRNA	dsim	8530425	wxd1_rep1
Dsim_2R:17786806-17786924	118	-12.2409	0.966758	0.999419	0.55453	23	0.030805	0.476606	23	0.903196	50857.3	0.59322	2.87814	-38.5	-33	0.5	-33	-15.8	-33	26	871.84	24	1.83234	-33	0.122057	rRNA	dsim	8530425	wxd1_rep1
Dsim_2R:17787179-17787297	118	-12.2409	0.966758	0.999419	0.55453	23	0.030805	0.476606	23	0.903196	50857.3	0.59322	2.87814	-38.5	-33	0.5	-33	-15.8	-33	26	871.84	24	1.83234	-33	0.122057	rRNA	dsim	8530425	wxd1_rep1
Dsim_2R:17787552-17787670	118	-12.2409	0.966758	0.999419	0.55453	23	0.030805	0.476606	23	0.903196	50857.3	0.59322	2.87814	-38.5	-33	0.5	-33	-15.8	-33	26	871.84	24	1.83234	-33	0.122057	rRNA	dsim	8530425	wxd1_rep1
Dsim_2R:17787925-17788043	118	-12.2409	0.966758	0.999419	0.55453	23	0.030805	0.476606	23	0.903196	50857.3	0.59322	2.87814	-38.5	-33	0.5	-33	-15.8	-33	26	871.84	24	1.83234	-33	0.122057	rRNA	dsim	8530425	wxd1_rep1
Dsim_2R:17788291-17788409	118	-12.2409	0.966758	0.999419	0.55453	23	0.030805	0.476606	23	0.903196	50857.3	0.59322	2.87814	-38.5	-33	0.5	-33	-15.8	-33	26	871.84	24	1.83234	-33	0.122057	rRNA	dsim	8530425	wxd1_rep1
Dsim_2R:17788657-17788775	118	-12.2409	0.966758	0.999419	0.55453	23	0.030805	0.476606	23	0.903196	50857.3	0.59322	2.87814	-38.5	-33	0.5	-33	-15.8	-33	26	871.84	24	1.83234	-33	0.122057	rRNA	dsim	8530425	wxd1_rep1
Dsim_2R:17789016-17789134	118	-12.2409	0.966758	0.999419	0.55453	23	0.030805	0.476606	23	0.903196	50857.3	0.59322	2.87814	-38.5	-33	0.5	-33	-15.8	-33	26	871.84	24	1.83234	-33	0.122057	rRNA	dsim	8530425	wxd1_rep1
Dsim_2R:17789389-17789506	117	-6.23072	0.986611	0.999054	0.593067	26	0.0141911	0.969726	-33	-33	0	0	2.78459	-38.6	-33	0.366197	-33	-15.1	-33	-33	-33	-33	2.31256	-33	0.310312	rRNA	dsim	8530425	wxd1_rep1
Dsim_2R:17789747-17789865	118	-12.2409	0.966758	0.999419	0.55453	23	0.030805	0.476606	23	0.903196	50857.3	0.59322	2.87814	-38.5	-33	0.5	-33	-15.8	-33	26	871.84	24	1.83234	-33	0.122057	rRNA	dsim	8530425	wxd1_rep1
Dsim_2R:17790127-17790245	118	-12.2409	0.966758	0.999419	0.55453	23	0.030805	0.476606	23	0.903196	50857.3	0.59322	2.87814	-38.5	-33	0.5	-33	-15.8	-33	26	871.84	24	1.83234	-33	0.122057	rRNA	dsim	8530425	wxd1_rep1
Dsim_2R:17790500-17790618	118	-12.2409	0.966758	0.999419	0.55453	23	0.030805	0.476606	23	0.903196	50857.3	0.59322	2.87814	-38.5	-33	0.5	-33	-15.8	-33	26	871.84	24	1.83234	-33	0.122057	rRNA	dsim	8530425	wxd1_rep1
Dsim_2R:17790873-17790991	118	-12.2409	0.966758	0.999419	0.55453	23	0.030805	0.476606	23	0.903196	50857.3	0.59322	2.87814	-38.5	-33	0.5	-33	-15.8	-33	26	871.84	24	1.83234	-33	0.122057	rRNA	dsim	8530425	wxd1_rep1
Dsim_2R:17791232-17791350	118	-12.2409	0.966758	0.999419	0.55453	23	0.030805	0.476606	23	0.903196	50857.3	0.59322	2.87814	-38.5	-33	0.5	-33	-15.8	-33	26	871.84	24	1.83234	-33	0.122057	rRNA	dsim	8530425	wxd1_rep1
Dsim_2R:17791598-17791716	118	-12.2409	0.966758	0.999419	0.55453	23	0.030805	0.476606	23	0.903196	50857.3	0.59322	2.87814	-38.5	-33	0.5	-33	-15.8	-33	26	871.84	24	1.83234	-33	0.122057	rRNA	dsim	8530425	wxd1_rep1
Dsim_2R:17791978-17792096	118	-12.2409	0.966758	0.999419	0.55453	23	0.030805	0.476606	23	0.903196	50857.3	0.59322	2.87814	-38.5	-33	0.5	-33	-15.8	-33	26	871.84	24	1.83234	-33	0.122057	rRNA	dsim	8530425	wxd1_rep1
Dsim_2R:17792358-17792476	118	-12.2409	0.966758	0.999419	0.55453	23	0.030805	0.476606	23	0.903196	50857.3	0.59322	2.87814	-38.5	-33	0.5	-33	-15.8	-33	26	871.84	24	1.83234	-33	0.122057	rRNA	dsim	8530425	wxd1_rep1
Dsim_2R:17792731-17792849	118	-12.2409	0.966758	0.999419	0.55453	23	0.030805	0.476606	23	0.903196	50857.3	0.59322	2.87814	-38.5	-33	0.5	-33	-15.8	-33	26	871.84	24	1.83234	-33	0.122057	rRNA	dsim	8530425	wxd1_rep1
Dsim_2R:21088068-21089894	1826	-11.4807	0.747627	0.794872	0.465368	18	0.162393	0.17094	-33	-0.503953	0	0.607886	3.07197	-579.4	-0.333333	0	-33	0	-33	19.3333	17094	11	1.98894	-33	0.820513	rRNA	dsim	8530425	wxd1_rep1
Dsim_3L:15637384-15637941	557	-3.16259	0.808356	0.823529	0.246001	18	0.0588235	0.794118	-33	-33	0	0.614004	2.84946	-137.2	-33	0	-33	0	-33	-33	-33	-33	-33	-33	0.382353	rRNA	dsim	8530425	wxd1_rep1
Dsim_3L:19028123-19030005	1882	-9.39328	0.74352	0.672727	0.340882	18	0.381818	0.527273	21	0.942809	9090.91	0.613178	2.35515	-561.8	1.76383	0	-33	0	-33	19.5	18181.8	26	2.48243	-33	0.7	rRNA	dsim	8530425	wxd1_rep1
Dsim_3L:19366347-19367910	1563	-6.96818	0.788842	0.661765	0.300953	18	0.367647	0.308823	-33	-0.333333	0	0.612924	2.91623	-465.5	-0.333333	0	-33	0	-33	-33	-33	-33	1.27427	-33	0.808824	rRNA	dsim	8530425	wxd1_rep1
Dsim_3L:21045240-21048306	3066	-9.96561	0.722914	0.663717	0.350029	18	0.0575221	0.548673	20.5	-0.259931	4424.78	0.637312	1.88706	-955.1	-33	0	-33	0	-33	22	13274.3	6	1.64533	-33	0.522124	rRNA	dsim	8530425	wxd1_rep1
Dsim_3R:4943771-4944907	1136	-6.25196	0.72472	0.835294	0.281791	18	0.270588	0.282353	-33	-0.333333	0	0.610915	2.5328	-324	-33	0	-33	0	-33	-33	-33	-33	2.35047	-33	0.517647	rRNA	dsim	8530425	wxd1_rep1
Dsim_3R:6843445-6844391	946	-2.08522	0.841276	0.55814	0.374804	18	0.186047	0.209302	-33	-0.333333	0	0.585624	2.84408	-296.5	-33	0	-33	0	-33	22	46511.6	17.5	2.35047	-33	0.767442	rRNA	dsim	8530425	wxd1_rep1
Dsim_3R:7525255-7527448	2193	-9.14095	0.691728	0.705128	0.474389	18	0.102564	0.480769	19	1.76383	19230.8	0.616507	1.81179	-719.7	-33	0	-33	0	-33	-33	-33	-33	1.64533	-33	0.455128	rRNA	dsim	8530425	wxd1_rep1
Dsim_3R:11413551-11414520	969	-5.03214	0.763841	0.666667	0.432136	18	0.266667	0.233333	21	-33	0	0.615067	2.60277	-317.9	-33	0	-33	0	-33	20.8333	66666.7	26	1.64533	-33	0.966667	rRNA	dsim	8530425	wxd1_rep1
Dsim_3R:13750790-13752086	1296	-6.869	0.658304	0.6	0.422352	18	0.12	0.46	19	-33	0	0.595679	2.27998	-356.7	-33	0	-33	0	-33	-33	-33	-33	-33	-33	0.52	rRNA	dsim	8530425	wxd1_rep1
Dsim_3R:22827190-22827900	710	-3.94804	0.700151	0.837838	0.519596	18	0.108108	0.135135	-33	-33	0	0.625352	2.58923	-227.1	-33	0	-33	0	-33	-33	-33	-33	-33	-33	0.54054	rRNA	dsim	8530425	wxd1_rep1
Dsim_3R:27872228-27873477	1249	-7.00711	0.743116	0.887097	0.449495	18	0.290323	0.258064	-33	-0.333333	0	0.549239	2.51984	-380.9	-33	0	-33	0	-33	-33	-33	-33	1.64533	-33	0.612903	rRNA	dsim	8530425	wxd1_rep1
Dsim_U_11:5375-7369	1994	-39.5277	0.914127	0.997009	0.413206	22	0.144965	0.229611	22	-0.780952	0.33459	0.647944	2.50541	-614.1	0.1212	0	-33	0	-33	19.5	14.3874	15	0.335254	0.283331	0.0442017	rRNA	dsim	8530425	wxd1_rep1
Dsim_U_11:8059-8237	178	-35.9263	0.970695	0.999301	0.448515	26	0.684621	0.0289797	20	-33	0	0.651685	2.44654	-49.8	-0.249774	0.550459	-33	-28.1	-33	23	1058.85	8	0.501517	0.284266	0.00708498	rRNA	dsim	8530425	wxd1_rep1
Dsim_U_11:14317-14495	178	-36.0205	0.973456	0.999301	0.449562	26	0.32847	0.217947	21.6	-33	0	0.539326	2.49641	-42.37	-33	0.666667	-0.170109	-28.9	-0.253274	23	482.512	8	0.193325	-0.829856	0.00708178	rRNA	dsim	8530425	wxd1_rep1
Dsim_U_11:15185-17179	1994	-39.493	0.914418	0.997009	0.41331	22	0.19342	0.35015	22	-0.765249	0.334593	0.565697	2.49755	-511.8	-33	0	-33	0	-33	19.5	10.3724	15	2.35047	0.383253	0.0441987	rRNA	dsim	8530425	wxd1_rep1
Dsim_U_11:34038-34216	178	-36.0205	0.973456	0.999301	0.449562	26	0.32847	0.217947	21.6	-33	0	0.539326	2.49641	-42.37	-33	0.666667	-0.170109	-28.9	-0.253274	23	482.512	8	0.193325	-0.829856	0.00708178	rRNA	dsim	8530425	wxd1_rep1
Dsim_U_11:34906-36900	1994	-39.493	0.914418	0.997009	0.41331	22	0.19342	0.35015	22	-0.765249	0.334593	0.565697	2.49755	-511.8	-33	0	-33	0	-33	19.5	10.3724	15	2.35047	0.383253	0.0441987	rRNA	dsim	8530425	wxd1_rep1
Dsim_U_16:10086-13996	3910	-38.489	0.911721	0.816727	0.355063	19	0.212022	0.366792	22	0.367851	76.5693	0.576982	2.65548	-937.8	0.0122994	0	-33	0	-33	20.5	402.101	29	1.24235	2.29556	0.0448808	rRNA	dsim	8530425	wxd1_rep1
Dsim_U_16:14389-14567	178	-35.9709	0.970681	0.999301	0.448454	26	0.336464	0.217148	23.1111	2.66667	0.360893	0.539326	2.46325	-42.37	-33	0.505494	-33	-18.1	-33	23	520.768	8	0.193325	-0.829856	0.00707963	rRNA	dsim	8530425	wxd1_rep1
Dsim_U_16:15232-17226	1994	-39.3228	0.912909	0.996711	0.413223	22	0.201037	0.347952	22	0.217443	2.68827	0.580742	2.80175	-508.9	-0.333333	0	-33	0	-33	19.5	11.0891	15	2.35047	0.375841	0.043054	rRNA	dsim	8530425	wxd1_rep1
Dsim_U_97:34129-34247	118	-12.2409	0.966758	0.999419	0.55453	23	0.030805	0.476606	23	0.903196	50857.3	0.59322	2.87814	-38.5	-33	0.5	-33	-15.8	-33	26	871.84	24	1.83234	-33	0.122057	rRNA	dsim	8530425	wxd1_rep1
Dsim_U_97:34502-34620	118	-12.2409	0.966758	0.999419	0.55453	23	0.030805	0.476606	23	0.903196	50857.3	0.59322	2.87814	-38.5	-33	0.5	-33	-15.8	-33	26	871.84	24	1.83234	-33	0.122057	rRNA	dsim	8530425	wxd1_rep1
Dsim_U_97:35241-35359	118	-12.2409	0.966758	0.999419	0.55453	23	0.030805	0.476606	23	0.903196	50857.3	0.59322	2.87814	-38.5	-33	0.5	-33	-15.8	-33	26	871.84	24	1.83234	-33	0.122057	rRNA	dsim	8530425	wxd1_rep1
Dsim_U_97:35614-35732	118	-12.2409	0.966758	0.999419	0.55453	23	0.030805	0.476606	23	0.903196	50857.3	0.59322	2.87814	-38.5	-33	0.5	-33	-15.8	-33	26	871.84	24	1.83234	-33	0.122057	rRNA	dsim	8530425	wxd1_rep1
Dsim_U_97:35987-36105	118	-12.2409	0.966758	0.999419	0.55453	23	0.030805	0.476606	23	0.903196	50857.3	0.59322	2.87814	-38.5	-33	0.5	-33	-15.8	-33	26	871.84	24	1.83234	-33	0.122057	rRNA	dsim	8530425	wxd1_rep1
Dsim_U_97:36353-36471	118	-12.2409	0.966758	0.999419	0.55453	23	0.030805	0.476606	23	0.903196	50857.3	0.59322	2.87814	-38.5	-33	0.5	-33	-15.8	-33	26	871.84	24	1.83234	-33	0.122057	rRNA	dsim	8530425	wxd1_rep1
Dsim_U_97:36716-36834	118	-12.2409	0.966758	0.999419	0.55453	23	0.030805	0.476606	23	0.903196	50857.3	0.59322	2.87814	-38.5	-33	0.5	-33	-15.8	-33	26	871.84	24	1.83234	-33	0.122057	rRNA	dsim	8530425	wxd1_rep1
Dsim_U_97:37079-37197	118	-12.2409	0.966758	0.999419	0.55453	23	0.030805	0.476606	23	0.903196	50857.3	0.59322	2.87814	-38.5	-33	0.5	-33	-15.8	-33	26	871.84	24	1.83234	-33	0.122057	rRNA	dsim	8530425	wxd1_rep1
Dsim_U_97:37832-37950	118	-12.2409	0.966758	0.999419	0.55453	23	0.030805	0.476606	23	0.903196	50857.3	0.59322	2.87814	-38.5	-33	0.5	-33	-15.8	-33	26	871.84	24	1.83234	-33	0.122057	rRNA	dsim	8530425	wxd1_rep1
Dsim_U_97:38198-38316	118	-12.2409	0.966758	0.999419	0.55453	23	0.030805	0.476606	23	0.903196	50857.3	0.59322	2.87814	-38.5	-33	0.5	-33	-15.8	-33	26	871.84	24	1.83234	-33	0.122057	rRNA	dsim	8530425	wxd1_rep1
Dsim_U_97:38578-38696	118	-12.2409	0.966758	0.999419	0.55453	23	0.030805	0.476606	23	0.903196	50857.3	0.59322	2.87814	-38.5	-33	0.5	-33	-15.8	-33	26	871.84	24	1.83234	-33	0.122057	rRNA	dsim	8530425	wxd1_rep1
Dsim_U_97:38951-39069	118	-12.2409	0.966758	0.999419	0.55453	23	0.030805	0.476606	23	0.903196	50857.3	0.59322	2.87814	-38.5	-33	0.5	-33	-15.8	-33	26	871.84	24	1.83234	-33	0.122057	rRNA	dsim	8530425	wxd1_rep1
Dsim_U_97:39316-39433	117	-6.23072	0.986611	0.999054	0.593067	26	0.0141911	0.969726	-33	-33	0	0	2.78459	-38.6	-33	0.366197	-33	-15.1	-33	-33	-33	-33	2.31256	-33	0.310312	rRNA	dsim	8530425	wxd1_rep1
Dsim_U_97:39702-39820	118	-11.267	0.967196	0.999411	0.554769	23	0.0296067	0.477832	23	0.761458	47135.1	0.59322	2.87814	-38.5	-33	0.571429	-33	-10.3	-33	26	883.783	24	1.9654	-33	0.110326	rRNA	dsim	8530425	wxd1_rep1
Dsim_U_97:40068-40185	117	-6.23072	0.986611	0.999054	0.593067	26	0.0141911	0.969726	-33	-33	0	0	2.78459	-38.6	-33	0.366197	-33	-15.1	-33	-33	-33	-33	2.31256	-33	0.310312	rRNA	dsim	8530425	wxd1_rep1
Dsim_U_97:40433-40550	117	-6.23072	0.986611	0.999054	0.593067	26	0.0141911	0.969726	-33	-33	0	0	2.78459	-38.6	-33	0.366197	-33	-15.1	-33	-33	-33	-33	2.31256	-33	0.310312	rRNA	dsim	8530425	wxd1_rep1
Dsim_U_97:40798-40916	118	-12.2409	0.966758	0.999419	0.55453	23	0.030805	0.476606	23	0.903196	50857.3	0.59322	2.87814	-38.5	-33	0.5	-33	-15.8	-33	26	871.84	24	1.83234	-33	0.122057	rRNA	dsim	8530425	wxd1_rep1
Dsim_U_97:41540-41657	117	-6.23072	0.986611	0.999054	0.593067	26	0.0141911	0.969726	-33	-33	0	0	2.78459	-38.6	-33	0.366197	-33	-15.1	-33	-33	-33	-33	2.31256	-33	0.310312	rRNA	dsim	8530425	wxd1_rep1
Dsim_U_97:43000-43118	118	-12.2409	0.966758	0.999419	0.55453	23	0.030805	0.476606	23	0.903196	50857.3	0.59322	2.87814	-38.5	-33	0.5	-33	-15.8	-33	26	871.84	24	1.83234	-33	0.122057	rRNA	dsim	8530425	wxd1_rep1
Dsim_U_97:47331-47448	117	-6.25456	0.986514	0.999056	0.592995	26	0.0141643	0.967894	-33	-33	0	0	2.78459	-34.8	-33	0.366197	-33	-15.1	-33	-33	-33	-33	2.31256	-33	0.311615	rRNA	dsim	8530425	wxd1_rep1
Dsim_U_100:1433-1611	178	-35.9263	0.970695	0.999301	0.448515	26	0.684621	0.0289797	20	-33	0	0.651685	2.44654	-49.8	-0.249774	0.550459	-33	-28.1	-33	23	1058.85	8	0.501517	0.284266	0.00708498	rRNA	dsim	8530425	wxd1_rep1
Dsim_U_100:2006-5967	3961	-38.4132	0.912724	0.813537	0.357152	18	0.160674	0.281809	21	0.339508	75.4355	0.640242	2.65897	-1176.2	0.794154	0	-33	0	-33	20.5	460.774	4	0.575901	2.90856	0.0454175	rRNA	dsim	8530425	wxd1_rep1
Dsim_U_100:13951-15945	1994	-39.5277	0.914127	0.997009	0.413206	22	0.144965	0.229611	22	-0.780952	0.33459	0.647944	2.50541	-614.1	0.1212	0	-33	0	-33	19.5	14.3874	15	0.335254	0.283331	0.0442017	rRNA	dsim	8530425	wxd1_rep1
Dsim_U_100:16635-16813	178	-35.9263	0.970695	0.999301	0.448515	26	0.684621	0.0289797	20	-33	0	0.651685	2.44654	-49.8	-0.249774	0.550459	-33	-28.1	-33	23	1058.85	8	0.501517	0.284266	0.00708498	rRNA	dsim	8530425	wxd1_rep1
Dsim_U_100:17208-21169	3961	-38.4132	0.912724	0.813537	0.357152	18	0.160674	0.281809	21	0.339508	75.4355	0.640242	2.65897	-1176.2	0.794154	0	-33	0	-33	20.5	460.774	4	0.575901	2.90856	0.0454175	rRNA	dsim	8530425	wxd1_rep1
Dsim_U_100:28285-30279	1994	-39.5277	0.914127	0.997009	0.413206	22	0.144965	0.229611	22	-0.780952	0.33459	0.647944	2.50541	-614.1	0.1212	0	-33	0	-33	19.5	14.3874	15	0.335254	0.283331	0.0442017	rRNA	dsim	8530425	wxd1_rep1
Dsim_U_100:30969-31147	178	-35.9263	0.970695	0.999301	0.448515	26	0.684621	0.0289797	20	-33	0	0.651685	2.44654	-49.8	-0.249774	0.550459	-33	-28.1	-33	23	1058.85	8	0.501517	0.284266	0.00708498	rRNA	dsim	8530425	wxd1_rep1
Dsim_U_148:3626-5620	1994	-39.5277	0.914127	0.997009	0.413206	22	0.144965	0.229611	22	-0.780952	0.33459	0.647944	2.50541	-614.1	0.1212	0	-33	0	-33	19.5	14.3874	15	0.335254	0.283331	0.0442017	rRNA	dsim	8530425	wxd1_rep1
4:55724044-55724314	270	-35.4562	0.87749	0.998248	0.548492	18	0.252336	0.226051	19	-0.381771	292.056	0.6	3.1177	-79.1	-33	0.542056	-0.19595	-31.6	1.67692	20	7593.46	6	1.50481	1.36033	0.481016	rRNA	zebrafish	1462962046	all_zebrafish
4:55727477-55727633	156	-43.9204	0.900408	1	0.622873	20	0.0467	0.1117	-33	-33	0	0	2.66286	-64.3	-0.21222	0.545454	-0.204627	-32.2	2.00695	-33	-33	-33	1.39406	0.727618	0.102444	rRNA	zebrafish	1462962046	all_zebrafish
7:5297-5450	153	-43.4729	0.900518	1	0.623246	20	0.0715	0.0775	-33	-33	0	0.614379	2.6097	-56.8	-0.111978	0.576577	-0.82734	-41.9	1.99867	-33	-33	-33	0.321842	0.0437284	0.103275	rRNA	zebrafish	1462962046	all_zebrafish
7:53641043-53641179	136	-6.49248	0.605098	0.642857	0.517753	18	0.285714	0	-33	-0.333333	0	0.617647	2.2201	-38	-33	0.708861	-33	-20.1	-33	-33	-33	-33	1.64533	-33	0.642857	rRNA	zebrafish	1462962046	all_zebrafish
19:11193250-11193364	114	2	0.682673	1	0.52729	18	0	0	-33	-33	0	0	2.71163	-26.2	-33	0.6	-33	-10.6	-33	-33	-33	-33	-33	-33	1	rRNA	zebrafish	1462962046	all_zebrafish
1:77121391-77121484	93	-15.8974	0.875121	0.9995	0.630745	18	0.171214	0.141729	26	0.780076	1404.22	0.623656	3.10837	-27.6	-33	0.547945	-33	-22.5	-33	22.75	5872.22	16	-0.116745	-33	0.0109466	rRNA	mouse	3849069296	(SRR13848060-SRR13848062, SRR24821465,SRR24821466,SRR24821469,SRR24821470)
1:46413358-46413476	118	-38.1807	0.913241	0.9994	0.565234	23	0.185189	0.0474715	21	-0.333333	0	0.576271	3.3024	-36.1	1.04089	0.612613	-0.368327	-36.1	1.31629	24	20.6935	8	1.21959	1.5692	0.00193841	rRNA	mouse	3849069296	(SRR13848060-SRR13848062, SRR24821465,SRR24821466,SRR24821469,SRR24821470)
1:154187155-154187274	119	-27.9684	0.897796	0.9996	0.597509	19	0.0763695	0.0771691	28	2.47249	66.386	0.571429	2.9732	-29.8	-33	0.575758	-33	-26.5	-33	23	2190.74	9	2.57627	2.9837	0.0110311	rRNA	mouse	3849069296	(SRR13848060-SRR13848062, SRR24821465,SRR24821466,SRR24821469,SRR24821470)
1:82612735-82612832	97	-31.5349	0.847573	0.9998	0.622485	18	0.272945	0.182164	23	-0.309433	12.2608	0.57732	3.03031	-28.8	1.02564	0.52381	-33	0	-33	24	4058.31	24	1.65338	1.69617	0.013542	rRNA	mouse	3849069296	(SRR13848060-SRR13848062, SRR24821465,SRR24821466,SRR24821469,SRR24821470)
1:83194393-83194513	120	-1.78466	0.73164	0.923077	0.522952	23	0.0769231	0.0769231	-33	-33	0	0	2.27275	-24.1	-33	0	-33	0	-33	-33	-33	-33	-33	-33	0.769231	rRNA	mouse	3849069296	(SRR13848060-SRR13848062, SRR24821465,SRR24821466,SRR24821469,SRR24821470)
X:75832029-75832136	107	-4.35679	0.594834	1	0.599885	18	0.266962	0.0250737	-33	-33	0	0	1.62533	-14.1	-33	0.390244	-33	0	-33	-33	-33	-33	-33	-33	0.0176991	rRNA	mouse	3849069296	(SRR13848060-SRR13848062, SRR24821465,SRR24821466,SRR24821469,SRR24821470)
X:67993171-67993291	120	-28.3609	0.827705	1	0.59898	18	0.1152	0.1561	-33	-33	0	0	3.04623	-29.6	-0.645588	0.528302	0.590942	-25.7	0.640821	-33	-33	-33	0.8841	1.51489	0.0109686	rRNA	mouse	3849069296	(SRR13848060-SRR13848062, SRR24821465,SRR24821466,SRR24821469,SRR24821470)
HE587793:736-854	118	-38.8611	0.88042	0.5	0.552833	27	0.22875	0.15135	19	-0.0233438	818.937	0.59322	3.02807	-39.3	-0.939184	0.576577	-0.281539	-33.6	-0.016037	23.5	12600.8	26	1.29382	1.3862	0.00632601	rRNA	spidermite	2023667092	all_spidermite (SRR10513013-SRR10513019)
HE587301:3362695-3362813	118	-37.8433	0.880849	0.5	0.551321	27	0.388	0.41965	19	-0.285365	554.942	0.59322	3.07925	-37.5	1.28051	0.58	0.700341	-32.6	0.201477	23.5	14883.3	8	1.0513	2.89735	0.00692041	rRNA	spidermite	2023667092	all_spidermite (SRR10513013-SRR10513019)
HE587306:102069-104237	2168	-36.3462	0.937104	0.5	0.519833	27	0.3463	0.3419	27	-0.177453	35.9803	0.593173	3.07337	-586.6	0.71466	0	-33	0	-33	23	381.648	29	0.476873	0.407025	0.0180562	rRNA	spidermite	2023667092	all_spidermite (SRR10513013-SRR10513019)
HE587306:144972-147139	2167	-36.6693	0.934054	0.5	0.516512	20	0.3377	0.3429	26	-0.108732	52.202	0.579603	3.09338	-589.5	-0.456074	0	-33	0	-33	23	457.429	4	0.491554	0.456808	0.0194393	rRNA	spidermite	2023667092	all_spidermite (SRR10513013-SRR10513019)
HE587311:1407491-1407609	118	-37.7162	0.88258	0.5	0.551937	27	0.38195	0.4233	23	0.286625	1095.3	0.59322	3.0653	-37.5	0.754511	0.574257	0.28671	-32.6	0.381524	23.5	9824.52	8	1.03739	2.89735	0.00688216	rRNA	spidermite	2023667092	all_spidermite (SRR10513013-SRR10513019)
HE587313:1079278-1079396	118	-38.1729	0.880063	0.5	0.550993	27	0.2342	0.15245	19	-0.181717	794.422	0.694915	3.05959	-37.8	1.11891	0.57732	0.972023	-24.7	0.189326	23.5	13273.1	8	1.22565	1.28731	0.0068534	rRNA	spidermite	2023667092	all_spidermite (SRR10513013-SRR10513019)
HE587313:1116678-1116796	118	-38.3273	0.882869	0.5	0.551705	27	0.21345	0.1596	19	-0.0646866	743.485	0.694915	3.01964	-37.8	-0.696049	0.677966	-0.463528	-36.5	0.349393	23.5	7323.68	8	1.2414	1.36061	0.00680137	rRNA	spidermite	2023667092	all_spidermite (SRR10513013-SRR10513019)
HE587314:1455453-1455571	118	-38.8088	0.880502	0.5	0.552129	27	0.2402	0.15455	23	-0.262583	530.553	0.694915	3.08645	-37.8	-0.426897	0.677966	-0.457742	-36.5	0.234283	23.5	10169.9	8	1.31836	1.39034	0.00674532	rRNA	spidermite	2023667092	all_spidermite (SRR10513013-SRR10513019)
HE587319:1475318-1475436	118	-39.0445	0.880482	0.5	0.553099	27	0.2356	0.1544	19	0.302683	916.474	0.694915	3.03258	-37.8	0	0.677966	-0.473708	-36.5	0.234237	23.5	10030.8	8	1.28963	1.28169	0.00670555	rRNA	spidermite	2023667092	all_spidermite (SRR10513013-SRR10513019)
4:55724044-55724314	270	-35.4562	0.87749	0.998248	0.548492	18	0.252336	0.226051	19	-0.381771	292.056	0.6	3.1177	-79.1	-33	0.542056	-0.19595	-31.6	1.67692	20	7593.46	6	1.50481	1.36033	0.481016	rRNA	zebrafish	1462962046	all_zebrafish (SRR1554490-SRR1554494)
4:55727477-55727633	156	-43.9204	0.900408	1	0.622873	20	0.0467	0.1117	-33	-33	0	0	2.66286	-64.3	-0.21222	0.545454	-0.204627	-32.2	2.00695	-33	-33	-33	1.39406	0.727618	0.102444	rRNA	zebrafish	1462962046	all_zebrafish (SRR1554490-SRR1554494)
7:5297-5450	153	-43.4729	0.900518	1	0.623246	20	0.0715	0.0775	-33	-33	0	0.614379	2.6097	-56.8	-0.111978	0.576577	-0.82734	-41.9	1.99867	-33	-33	-33	0.321842	0.0437284	0.103275	rRNA	zebrafish	1462962046	all_zebrafish (SRR1554490-SRR1554494)
7:53641043-53641179	136	-6.49248	0.605098	0.642857	0.517753	18	0.285714	0	-33	-0.333333	0	0.617647	2.2201	-38	-33	0.708861	-33	-20.1	-33	-33	-33	-33	1.64533	-33	0.642857	rRNA	zebrafish	1462962046	all_zebrafish (SRR1554490-SRR1554494)
19:11193250-11193364	114	2	0.682673	1	0.52729	18	0	0	-33	-33	0	0	2.71163	-26.2	-33	0.6	-33	-10.6	-33	-33	-33	-33	-33	-33	1	rRNA	zebrafish	1462962046	all_zebrafish (SRR1554490-SRR1554494)
4:393767-393903	136	-7.30929	0.837364	0.97992	0.467732	31	0.128514	0.257028	19	-0.333333	0	0.558824	2.43069	-39.5	-0.333333	0.5	2.66667	-10.1	-0.29973	-33	-33	-33	2.35047	2.46074	0.538153	sno	zebrafish	1462962046	all_zebrafish (SRR1554490-SRR1554494)
2:16824760-16824820	60	2	0.520493	0.5	0.376263	18	0.5	0.5	-33	-33	0	0	-33	0	-33	0	-33	0	-33	-33	-33	-33	-33	-33	1	sno	zebrafish	1462962046	all_zebrafish (SRR1554490-SRR1554494)
4:393767-393903	136	-7.30929	0.837364	0.97992	0.467732	31	0.128514	0.257028	19	-0.333333	0	0.558824	2.43069	-39.5	-0.333333	0.5	2.66667	-10.1	-0.29973	-33	-33	-33	2.35047	2.46074	0.538153	sno	zebrafish	1462962046	all_zebrafish (SRR1554490-SRR1554494)
2:16824760-16824820	60	2	0.520493	0.5	0.376263	18	0.5	0.5	-33	-33	0	0	-33	0	-33	0	-33	0	-33	-33	-33	-33	-33	-33	1	sno	zebrafish	1462962046	all_zebrafish (SRR1554490-SRR1554494)
Dsim_2L:408427-408539	112	-4.10965	0.908231	0.989399	0.375145	21	0.0848056	0.116608	-33	-33	0	0.571429	2.98544	-21.6	-33	0.604651	-33	-13.8	-33	-33	-33	-33	-33	-33	0.310954	snoRNA	dsim	8530425	wxd1_rep1
Dsim_2L:1023715-1023869	154	-6.49248	0.627745	0.989011	0.264732	18	0.0659341	0.417582	-33	-33	0	0.441558	2.52213	-30.3	-33	0.375	-33	0	-33	-33	-33	-33	-33	-33	0.0989011	snoRNA	dsim	8530425	wxd1_rep1
Dsim_2L:2150919-2151072	153	2	-1	1	0.263158	19	1	0	-33	-33	0	0	-33	0	-33	0	-33	0	-33	-33	-33	-33	-33	-33	1	snoRNA	dsim	8530425	wxd1_rep1
Dsim_2L:4196641-4196781	140	-4.19908	0.660082	0.857143	0.20802	18	0.714286	0.285714	-33	-33	0	0	2.46348	-26.2	-33	0.40625	-33	0	-33	-33	-33	-33	-33	-33	0.571429	snoRNA	dsim	8530425	wxd1_rep1
Dsim_2R:22181669-22181790	121	-2.71246	0.951324	0.976852	0.214762	26	0.75463	0.0648148	27	1.76383	4629.63	0.380165	3.31972	NA	-33	0.292683	-33	0	-33	22	27777.8	28	1.52133	-33	0.300926	snoRNA	dsim	8530425	wxd1_rep1
Dsim_2R:22181903-22182012	109	-1.37103	0.922708	0.979167	0.275019	20	0.0520833	0.0729167	-33	-0.402015	0	0.495413	3.02011	-18.4	-33	0.466667	-0.416667	-13.6	1.82665	22	62500	23	2.73274	-33	0.4375	snoRNA	dsim	8530425	wxd1_rep1
Dsim_2R:22248623-22248763	140	2	0.682673	0.666667	0.369103	18	0	0.666667	-33	-33	0	0	-33	0	-33	0.561404	-33	0	-33	-33	-33	-33	-33	-33	1	snoRNA	dsim	8530425	wxd1_rep1
Dsim_2R:22626333-22626478	145	-2.4047	0.922215	0.822222	0.191157	19	0.377778	0.666667	-33	-33	0	0.524138	2.85042	-29.2	-33	0.507463	-0.143777	0	0.082266	20	111111	13.5	1.64533	-33	0.4	snoRNA	dsim	8530425	wxd1_rep1
Dsim_3L:283090-283462	372	-13.4594	0.877832	0.993853	0.433597	19	0.0891393	0.438525	19	-0.683837	0	0.607527	2.19543	-93.5	-33	0	-33	0	-33	19.5	4098.36	14	1.31258	1.64533	0.351434	snoRNA	dsim	8530425	wxd1_rep1
Dsim_3L:284949-285121	172	-3.6928	0.78508	0.589552	0.436939	18	0.559701	0.492537	19	-33	0	0.581395	2.85455	-51.9	-33	0.592593	-33	-20.5	-33	21	761194	11	1.22358	-33	0.432836	snoRNA	dsim	8530425	wxd1_rep1
Dsim_3L:859885-859965	80	-3.09169	0.849568	0.701658	0.240366	18	0.342541	0.508287	21	-0.361931	0	0.45	2.62672	NA	-33	0.451613	-33	0	-33	22.2857	11049.7	19	1.64533	-33	0.348066	snoRNA	dsim	8530425	wxd1_rep1
Dsim_3L:860110-860207	97	-3.60841	0.82021	0.79566	0.285784	18	0.788427	0.330922	-33	-33	0	0.494845	3.1858	-11.9	-33	0.361446	2.66667	0	1.6473	19	433996	4	1.63671	-33	0.0958409	snoRNA	dsim	8530425	wxd1_rep1
Dsim_3L:862500-862585	85	-4.68024	0.812364	0.99619	0.427518	18	0.169524	0.333333	-33	-33	0	0	3.01935	-20.4	-33	0.521739	-33	0	-33	19	97142.9	12	1.93888	-33	0.179048	snoRNA	dsim	8530425	wxd1_rep1
Dsim_3L:863010-863099	89	-4.81833	0.954192	0.998705	0.321601	21	0.111399	0.471503	-33	-33	0	0	2.29108	-15	-33	0.691358	-33	-11.5	-33	21.5	5181.35	9	0.45159	-33	0.167098	snoRNA	dsim	8530425	wxd1_rep1
Dsim_X:20522303-20522383	80	-3.88375	0.789072	0.995671	0.346795	18	0.238095	0.454545	-33	-33	0	0	2.4228	NA	-33	0.441558	-33	0	-33	19	402597	10	1.81865	-33	0.307359	snoRNA	dsim	8530425	wxd1_rep1
Dsim_X:20523682-20523760	78	-4.12248	0.942852	1	0.339369	22	0.0508167	0.166969	-33	-33	0	0	2.81616	NA	2.66052	0.447368	-0.288646	0	1.53467	-33	-33	-33	2.51213	-33	0.186933	snoRNA	dsim	8530425	wxd1_rep1
Dsim_X:16643587-16643736	149	-5.47441	0.905652	0.982659	0.348208	24	0.306358	0.213873	-33	-0.471405	0	0.657718	2.84858	-45.7	-33	0.772727	-0.860663	-28.1	0.0242056	21	11560.7	5	0.0626494	-33	0.647399	snoRNA	dsim	8530425	wxd1_rep1
Dsim_X:16643759-16643897	138	-3.14147	0.871773	0.984375	0.335389	24	0.515625	0.046875	-33	-33	0	0	2.90338	-31	-33	0.469388	-33	-20.2	-33	-33	-33	-33	0.540638	1.64533	0.671875	snoRNA	dsim	8530425	wxd1_rep1
Dsim_X:16643932-16644081	149	-5.47441	0.905652	0.982659	0.348208	24	0.306358	0.213873	-33	-0.471405	0	0.657718	2.84858	-45.7	-33	0.772727	-0.860663	-28.1	0.0242056	21	11560.7	5	0.0626494	-33	0.647399	snoRNA	dsim	8530425	wxd1_rep1
Dsim_X:16644104-16644242	138	-3.51059	0.816873	0.975904	0.363419	18	0.385542	0.0361446	27	-0.374585	0	0	2.14474	-29.7	-33	0.591837	-33	-19.4	-33	-33	-33	-33	0.719588	1.64533	0.542169	snoRNA	dsim	8530425	wxd1_rep1
NT_033779.5:20418671-20418805	134	-0.370258	0.833885	1	0.374427	27	0.0526316	0.0350877	-33	-33	0	0.552239	2.97698	-28.7	-33	0	-33	0	-33	-33	-33	-33	-33	-33	0.245614	snoRNA	dmel	192595761	ovary_v097
NT_033779.5:20419146-20419282	136	-0.736377	0.850154	1	0.486598	26	0	0.166667	-33	-33	0	0.573529	2.73274	-27.5	-33	0	-33	0	-33	-33	-33	-33	-33	-33	0.416667	snoRNA	dmel	192595761	ovary_v097
NC_004354.4:1482493-1482591	98	-0.649305	0.715459	1	0.429762	28	0.166667	0.166667	-33	-33	0	0	3.07659	-19.3	-33	0.594595	-33	-15.4	-33	-33	-33	-33	-33	-33	0.666667	snoRNA	dmel	192595761	ovary_v097
NC_004354.4:1482560-1482630	70	-0.671356	0.906292	1	0.328084	19	0.555288	0.237981	-33	-33	0	0	2.77354	-14	-0.333333	0.647059	-0.353768	-11.5	0.460559	-33	-33	-33	2.0938	-33	0.0600962	snoRNA	dmel	192595761	ovary_v097
NC_004354.4:5524303-5524466	163	-3.60976	0.888697	0.998921	0.426646	18	0.0614887	0.0280475	-33	-33	0	0	3.08322	-36.7	-33	0.490196	-33	-14.7	-33	-33	-33	-33	-0.667062	-33	0.0960086	snoRNA	dmel	192595761	ovary_v097
NC_004354.4:6531636-6531702	66	-0.117129	0.927234	1	0.447603	28	0.169811	0.207547	-33	-33	0	0	2.54577	-16.6	-33	0.588235	-33	-25.1	-33	-33	-33	-33	-33	-33	0.10566	snoRNA	dmel	192595761	ovary_v097
NT_033779.5:8042190-8042351	161	-0.987721	0.905396	0.970588	0.465921	23	0.279412	0.0735294	-33	-33	0	0	2.48126	-48.6	-33	0.426966	-33	-12.1	-33	24	29411.8	9	2.90856	-33	0.294118	snoRNA	dmel	192595761	ovary_v097
NT_033779.5:9894796-9894908	112	-1.26251	0.946965	1	0.39322	25	0.43956	0.164835	-33	-33	0	0	1.88923	-22.8	-33	0.449438	-33	-12.9	-33	-33	-33	-33	2.64987	-33	0.351648	snoRNA	dmel	192595761	ovary_v097
NT_033779.5:12432799-12432951	152	-0.622982	0.821647	1	0.343323	19	0.3125	0.6875	-33	-33	0	0	3.02235	-37.8	-33	0.606742	-33	-18.4	-33	-33	-33	-33	-33	-33	0.6875	snoRNA	dmel	192595761	ovary_v097
NT_033779.5:12433026-12433181	155	2	0.594031	1	0.394444	20	0.666667	0	-33	-33	0	0	2.22532	-35.4	-33	0	-33	0	-33	-33	-33	-33	-33	-33	1	snoRNA	dmel	192595761	ovary_v097
NC_004354.4:21386846-21386936	90	-2.64837	0.679089	1	0.515038	19	0.285714	0	-33	-33	0	0	2.52309	-22.3	-33	0.630435	-33	-22.3	-33	-33	-33	-33	1.64533	-33	0.714286	snoRNA	dmel	192595761	ovary_v097
NT_033779.5:4457604-4457675	71	-0.975316	0.906021	1	0.537249	19	0.148601	0.0786713	-33	-33	0	0	2.84309	-18.1	-0.333333	0.488372	-33	-18.4	-33	-33	-33	-33	0.839146	2.35047	0.0821678	snoRNA	dmel	192595761	ovary_v097
NT_033778.4:11591342-11591486	144	-0.988964	0.688001	1	0.356805	19	0.285714	0.285714	-33	-33	0	0	2.20019	-33.3	-33	0	-33	0	-33	-33	-33	-33	-33	-33	0.714286	snoRNA	dmel	192595761	ovary_v097
NT_033778.4:13557540-13557687	147	-0.0926065	0.983465	1	0.343027	23	0.238095	0.428571	-33	-33	0	0	2.49432	-26.2	-33	0.321429	-33	0	-33	-33	-33	-33	3.20627	-33	0.761905	snoRNA	dmel	192595761	ovary_v097
NT_037436.4:259971-260281	310	-1.13111	0.917016	1	0.473597	23	0.224138	0.706897	-33	-33	0	0	2.94527	-70.1	-33	0	-33	0	-33	-33	-33	-33	-33	-33	0.586207	snoRNA	dmel	192595761	ovary_v097
NT_037436.4:261804-261954	150	-0.513723	0.856051	1	0.498472	21	0.230769	0.153846	-33	-33	0	0	1.90211	-55	-33	0.45946	-0.333333	-13	0.779985	-33	-33	-33	1.64533	-33	0.846154	snoRNA	dmel	192595761	ovary_v097
NT_033777.3:5596361-5596510	149	-1.31384	0.90613	1	0.39757	25	0.0228571	0.422857	-33	-33	0	0	3.03593	-27.9	-33	0.629213	-0.787294	-17	0.351851	-33	-33	-33	3.39405	-33	0.182857	snoRNA	dmel	192595761	ovary_v097
NT_033777.3:5596527-5596659	132	-1.17975	0.933544	1	0.342647	24	0.0116279	0.813953	-33	-33	0	0	1.00302	-26.9	-33	0.467533	-33	-10.4	-33	-33	-33	-33	-33	-33	0.244186	snoRNA	dmel	192595761	ovary_v097
NT_033777.3:28603372-28603523	151	-0.870379	0.851027	1	0.479084	19	0.26087	0.130435	-33	-33	0	0.649007	2.04249	-43.3	-33	0.60274	-33	-16.4	-33	-33	-33	-33	3.39405	-33	0.782609	snoRNA	dmel	192595761	ovary_v097
NT_033777.3:28812569-28812642	73	2	0.682673	1	0.527972	18	0.333333	0	-33	-33	0	0.575342	3.39405	-17.5	-33	0	-33	0	-33	-33	-33	-33	-33	-33	1	snoRNA	dmel	192595761	ovary_v097
NT_033777.3:29862627-29862718	91	-0.499992	0.972668	0.994819	0.352594	21	0.65285	0.0829016	-33	-33	0	0.505494	2.71577	-11.7	-33	0.409091	-33	0	-33	-33	-33	-33	0.232286	1.64533	0.160622	snoRNA	dmel	192595761	ovary_v097
NT_033777.3:29863300-29863345	45	-0.358906	0.924751	1	0.486758	19	0.3125	0.4375	-33	-33	0	0.622222	1.55886	NA	2.66667	0.596491	-0.438397	-10.9	1.54863	-33	-33	-33	2.73274	-33	0.6875	snoRNA	dmel	192595761	ovary_v097
NT_033777.3:30206784-30206927	143	-0.619846	0.949717	1	0.56415	25	0.0425532	0.0851064	-33	-33	0	0	2.57927	-47.4	-33	0.452381	-33	-24.8	-33	-33	-33	-33	-33	-33	0.319149	snoRNA	dmel	192595761	ovary_v097
NT_033777.3:30206977-30207113	136	2	0.520493	1	0.372294	21	0.5	1	-33	-33	0	0	-33	0	-33	0.578313	-33	-17	-33	-33	-33	-33	-33	-33	1	snoRNA	dmel	192595761	ovary_v097
NT_033777.3:30207157-30207292	135	-0.0404761	0.903726	1	0.441224	22	0.230769	0.538462	-33	-33	0	0	1.99293	-41.2	-33	0.6	-33	-27.5	-33	-33	-33	-33	1.64533	-33	0.769231	snoRNA	dmel	192595761	ovary_v097
NT_033777.3:30207323-30207459	136	-0.60854	0.927053	1	0.457901	21	0.333333	0.222222	-33	-33	0	0	2.55249	-38.3	-33	0.666667	-33	-18.3	-33	-33	-33	-33	-33	-33	0.888889	snoRNA	dmel	192595761	ovary_v097
NT_033777.3:30207494-30207631	137	-0.889758	0.747946	1	0.327049	25	0.333333	0.444444	-33	-33	0	0	3.01063	-30	-33	0.42	-33	-15.9	-33	-33	-33	-33	-33	-33	0.888889	snoRNA	dmel	192595761	ovary_v097
NC_004354.4:763084-763235	151	-1.31335	0.978768	1	0.496503	22	0.0777778	0.3	-33	-33	0	0	0.476775	-41.5	-0.251673	0.6	-33	-31.1	-33	-33	-33	-33	2.66932	-33	0.288889	snoRNA	dmel	283063946	bonini_head_3d_wt SRR1042453
NC_004354.4:763943-764087	144	-1.61533	0.745064	1	0.599255	18	0	0	-33	-33	0	0	2.23127	-46.6	-33	0.448276	-33	-19.6	-33	-33	-33	-33	-33	-33	0.875	snoRNA	dmel	283063946	bonini_head_3d_wt SRR1042454
NC_004354.4:1482493-1482591	98	-0.357076	0.984028	1	0.394638	28	0.00348432	0.00696864	-33	-33	0	0	3.09064	-19.3	-33	0	-33	0	-33	-33	-33	-33	-33	-33	0.0487805	snoRNA	dmel	283063946	bonini_head_3d_wt SRR1042455
NC_004354.4:1482560-1482630	70	-1.04396	0.968972	1	0.391378	28	0.0132013	0.019802	-33	-33	0	0	2.24766	-14	-33	0.57971	-0.333333	-10.4	-0.200416	-33	-33	-33	2.35047	-33	0.0660066	snoRNA	dmel	283063946	bonini_head_3d_wt SRR1042456
NC_004354.4:5524303-5524466	163	-2.89545	0.840401	1	0.42451	18	0.0833333	0.208333	-33	-33	0	0	2.7708	-36.7	-33	0.426966	-33	-10.3	-33	-33	-33	-33	2.35047	-33	0.625	snoRNA	dmel	283063946	bonini_head_3d_wt SRR1042457
NC_004354.4:6531636-6531702	66	-1.97416	0.878291	1	0.450954	28	0.0389762	0.0326041	-33	-33	0	0	2.66928	-16.6	-33	0.567901	-33	-24.1	-33	-33	-33	-33	-33	-33	0.00647833	snoRNA	dmel	283063946	bonini_head_3d_wt SRR1042458
NC_004354.4:6742350-6742492	142	-1.37493	0.976981	1	0.497802	26	0.137363	0.741758	-33	-33	0	0	2.81661	-46.8	-33	0.601942	-33	-25.8	-33	-33	-33	-33	-33	-33	0.230769	snoRNA	dmel	283063946	bonini_head_3d_wt SRR1042459
NC_004354.4:6742687-6742827	140	-0.109639	0.970803	1	0.522864	26	0.0517241	0.706897	-33	-33	0	0	2.99088	-41.4	2.66556	0	-33	0	-33	-33	-33	-33	-33	-33	0.293103	snoRNA	dmel	283063946	bonini_head_3d_wt SRR1042460
NC_004354.4:6742853-6743002	149	-0.127487	1	1	0.486672	23	0.0142146	0.595593	-33	-33	0	0	2.73551	-41.4	-33	0.626506	-33	-27.8	-33	-33	-33	-33	-33	-33	0.018479	snoRNA	dmel	283063946	bonini_head_3d_wt SRR1042461
NC_004354.4:9274715-9274863	148	-1.15742	0.822189	1	0.539619	19	0.384615	0.0769231	-33	-33	0	0.581081	2.17142	-59.8	-33	0.382979	-33	-15	-33	-33	-33	-33	1.64533	-33	0.923077	snoRNA	dmel	283063946	bonini_head_3d_wt SRR1042462
NC_004354.4:10348126-10348338	212	-6.78919	0.924496	0.999342	0.493358	21	0.0223782	0.32251	24	-33	0	0.679245	3.03993	-73.2	-0.333333	0.583333	-33	-22.2	-33	19.5	877.578	19	1.44771	-33	0.0353225	snoRNA	dmel	283063946	bonini_head_3d_wt SRR1042463
NC_004354.4:17143935-17144069	134	-0.781851	0.883305	1	0.391968	21	0.0588235	0.0588235	-33	-33	0	0	2.34184	-24.3	-33	0.565657	-0.333333	-18.4	2.3995	-33	-33	-33	-33	-33	0.647059	snoRNA	dmel	283063946	bonini_head_3d_wt SRR1042464
NC_004354.4:17144108-17144241	133	-0.0965701	0.889095	1	0.412009	20	0	0.0909091	-33	-33	0	0	2.33796	-25.7	-33	0.45614	-33	0	-33	-33	-33	-33	-33	-33	0.727273	snoRNA	dmel	283063946	bonini_head_3d_wt SRR1042465
NC_004354.4:17144284-17144421	137	-0.595429	0.752198	1	0.456874	22	0	0.166667	-33	-33	0	0	2.04799	-28.2	-33	0	-33	0	-33	-33	-33	-33	-33	-33	0.833333	snoRNA	dmel	283063946	bonini_head_3d_wt SRR1042466
NC_004354.4:17144436-17144575	139	-1.55431	0.906729	1	0.474783	22	0.109091	0.363636	-33	-33	0	0	2.0235	-40	-33	0.531915	-33	-30.5	-33	-33	-33	-33	2.71163	1.64533	0.527273	snoRNA	dmel	283063946	bonini_head_3d_wt SRR1042467
NC_004354.4:17144832-17144971	139	-1.57564	0.793301	1	0.489072	18	0.0909091	0.272727	-33	-33	0	0	2.04554	-23.7	-33	0.363636	-33	0	-33	-33	-33	-33	-33	-33	1	snoRNA	dmel	283063946	bonini_head_3d_wt SRR1042468
NC_004354.4:17145211-17145350	139	-0.858912	0.819236	1	0.443369	19	0	0.166667	-33	-33	0	0	2.11857	-32.2	-33	0.6	-33	-17.9	-33	-33	-33	-33	-33	-33	1	snoRNA	dmel	283063946	bonini_head_3d_wt SRR1042469
NC_004354.4:17145385-17145535	150	-0.414684	0.776905	1	0.433403	21	0.428571	0	-33	-33	0	0	2.54748	-44.4	-33	0.647059	-33	-23.8	-33	-33	-33	-33	-33	-33	1	snoRNA	dmel	283063946	bonini_head_3d_wt SRR1042470
NC_004354.4:17145558-17145696	138	2	0.678408	1	0.42384	21	0	0.333333	-33	-33	0	0	2.73274	-27.7	-33	0.542857	-33	-11.2	-33	-33	-33	-33	-33	-33	1	snoRNA	dmel	283063946	bonini_head_3d_wt SRR1042471
NC_004354.4:17145731-17145881	150	-0.414684	0.776905	1	0.433403	21	0.428571	0	-33	-33	0	0	2.54748	-43.5	-33	0.647059	-33	-23.8	-33	-33	-33	-33	-33	-33	1	snoRNA	dmel	283063946	bonini_head_3d_wt SRR1042472
NC_004354.4:17145904-17146042	138	2	0.520493	1	0.443452	21	0	0	-33	-33	0	0	-33	0	-33	0	-33	0	-33	-33	-33	-33	-33	-33	1	snoRNA	dmel	283063946	bonini_head_3d_wt SRR1042473
NC_004354.4:17146075-17146216	141	2	-1	1	0.333333	21	0	0	-33	-33	0	0	-33	0	-33	0	-33	0	-33	-33	-33	-33	-33	-33	1	snoRNA	dmel	283063946	bonini_head_3d_wt SRR1042474
NC_004354.4:17146249-17146391	142	-0.565864	0.726825	1	0.396079	21	0	0.8	-33	-33	0	0	2.22532	-31.3	-33	0.536083	-33	-16.4	-33	-33	-33	-33	-33	-33	1	snoRNA	dmel	283063946	bonini_head_3d_wt SRR1042475
NC_004354.4:17146402-17146546	144	2	-1	1	0.363636	22	1	0	-33	-33	0	0	-33	0	-33	0	-33	0	-33	-33	-33	-33	-33	-33	1	snoRNA	dmel	283063946	bonini_head_3d_wt SRR1042476
NC_004354.4:17146613-17146760	147	-1.27245	0.883574	1	0.516479	20	0.363636	0.136364	-33	-33	0	0	2.14017	-40	-33	0.511628	-33	-24.8	-33	-33	-33	-33	2.48331	-33	0.818182	snoRNA	dmel	283063946	bonini_head_3d_wt SRR1042477
NC_004354.4:21050899-21050979	80	2	-1	1	0.291667	24	0	0	-33	-33	0	0	-33	0	-33	0	-33	0	-33	-33	-33	-33	-33	-33	1	snoRNA	dmel	283063946	bonini_head_3d_wt SRR1042478
NC_004354.4:21051687-21051735	48	-0.595972	0.791337	1	0.535945	18	0	0	-33	-33	0	0	2.91308	-10.4	-33	0	-33	0	-33	-33	-33	-33	-33	-33	0.875	snoRNA	dmel	283063946	bonini_head_3d_wt SRR1042479
NC_004354.4:21052284-21052362	78	2	-1	1	0.36	25	0	0	-33	-33	0	0	-33	0	-33	0	-33	0	-33	-33	-33	-33	-33	-33	1	snoRNA	dmel	283063946	bonini_head_3d_wt SRR1042480
NC_004354.4:21386846-21386936	90	2	0.637828	1	0.431562	18	0	0.666667	-33	-33	0	0	1.64533	-22.3	-33	0.630435	-33	-22.3	-33	-33	-33	-33	-33	-33	0.5	snoRNA	dmel	283063946	bonini_head_3d_wt SRR1042481
NT_033779.5:232167-232254	87	-0.0405501	0.767511	1	0.365278	18	0	0.5	-33	-33	0	0	2.47436	-16.6	-33	0.454545	-33	0	-33	-33	-33	-33	-33	-33	1	snoRNA	dmel	283063946	bonini_head_3d_wt SRR1042482
NT_033779.5:4457604-4457675	71	-2.72001	0.875866	1	0.549964	29	0.0679852	0.113721	-33	-33	0	0	3.13806	-18.1	2.49801	0.488372	-33	-18.4	-33	-33	-33	-33	-0.00223889	3.19256	0.0914709	snoRNA	dmel	283063946	bonini_head_3d_wt SRR1042483
NT_033779.5:5202384-5202523	139	-0.54315	0.809066	1	0.536527	18	0.333333	0.333333	-33	-33	0	0.618705	2.01166	-39.9	-33	0.646154	2.66667	-16	0.877707	-33	-33	-33	-33	-33	1	snoRNA	dmel	283063946	bonini_head_3d_wt SRR1042484
NT_033779.5:6917211-6917311	100	-1.39767	0.907316	1	0.436407	25	0.0506329	0.177215	-33	-33	0	0	0.892254	-16.8	-33	0.535211	-0.333333	-11.9	-0.225798	-33	-33	-33	-33	-33	0.316456	snoRNA	dmel	283063946	bonini_head_3d_wt SRR1042485
NT_033779.5:8042190-8042351	161	-2.31736	0.920365	1	0.519875	21	0.0465116	0.706977	-33	-33	0	0	2.24594	-48.6	-33	0.597938	-33	-37.2	-33	-33	-33	-33	2.73274	-33	0.162791	snoRNA	dmel	283063946	bonini_head_3d_wt SRR1042486
NT_033779.5:9893947-9894027	80	-0.570867	0.893551	1	0.515141	21	0.0115385	0.0269231	-33	-33	0	0	2.92898	-17.9	-33	0.506329	-33	-17.9	-33	-33	-33	-33	2.35047	-33	0.0961538	snoRNA	dmel	283063946	bonini_head_3d_wt SRR1042487
NT_033779.5:9894206-9894286	80	-0.930674	0.920396	1	0.475843	28	0.00443459	0.0199556	-33	-33	0	0	2.92773	-18.4	-33	0.506329	-33	-18.4	-33	-33	-33	-33	1.64533	-33	0.0620843	snoRNA	dmel	283063946	bonini_head_3d_wt SRR1042488
Dsim_2L:9970537-9970649	112	-9.92011	0.863731	0.951552	0.383722	18	0.135503	0.322483	-33	-33	0	0.517857	2.3834	-22.8	-33	0.517857	-33	-22.8	-33	23	330053	11	-0.962187	2.25417	0.252839	snoRNA	dsim	8530425	wxd1_rep1
Dsim_2L:20555114-20555188	74	-5.2519	0.84977	0.995037	0.340819	18	0.538462	0.312655	-33	-33	0	0.621622	2.81435	-11.7	-0.333333	0.658228	-0.503953	-13.2	0.415989	19.5	243176	9	2.72858	-33	0.253102	snoRNA	dsim	8530425	wxd1_rep1
Dsim_2L:20555357-20555431	74	-5.77762	0.89018	0.998805	0.296301	22	0.827957	0.158901	-33	-33	0	0.513513	2.83998	-12.7	-33	0.475	-33	-12.7	-33	19.5	117085	9	-0.227896	3.39405	0.172043	snoRNA	dsim	8530425	wxd1_rep1
Dsim_2L:20555600-20555674	74	-6.91473	0.876271	0.998789	0.291547	18	0.818402	0.163438	-33	-33	0	0.513513	2.77391	-10.6	-0.359573	0.560976	-0.444799	-11	1.00846	19.5	118644	9	-0.158215	2.90856	0.173124	snoRNA	dsim	8530425	wxd1_rep1
Dsim_2L:20555836-20555910	74	-5.77762	0.89018	0.998805	0.296301	22	0.827957	0.158901	-33	-33	0	0.513513	2.83998	-12.7	-33	0.475	-33	-12.7	-33	19.5	117085	9	-0.227896	3.39405	0.172043	snoRNA	dsim	8530425	wxd1_rep1
Dsim_2L:20556079-20556153	74	-6.91473	0.876271	0.998789	0.291547	18	0.818402	0.163438	-33	-33	0	0.513513	2.77391	-10.6	-0.359573	0.560976	-0.444799	-11	1.00846	19.5	118644	9	-0.158215	2.90856	0.173124	snoRNA	dsim	8530425	wxd1_rep1
Dsim_2L:20556315-20556389	74	-5.77762	0.89018	0.998805	0.296301	22	0.827957	0.158901	-33	-33	0	0.513513	2.83998	-12.7	-33	0.475	-33	-12.7	-33	19.5	117085	9	-0.227896	3.39405	0.172043	snoRNA	dsim	8530425	wxd1_rep1
Dsim_2L:20556558-20556632	74	-6.91473	0.876271	0.998789	0.291547	18	0.818402	0.163438	-33	-33	0	0.513513	2.77391	-10.6	-0.359573	0.560976	-0.444799	-11	1.00846	19.5	118644	9	-0.158215	2.90856	0.173124	snoRNA	dsim	8530425	wxd1_rep1
Dsim_2L:20556795-20556868	73	-5.9825	0.889608	0.99761	0.296374	22	0.826762	0.160096	-33	-33	0	0.520548	2.84	-12.7	-33	0.527778	-33	-12.7	-33	19.5	117085	18	-0.191096	3.39405	0.172043	snoRNA	dsim	8530425	wxd1_rep1
Dsim_2R:7288590-7288674	84	-6.53272	0.875698	0.877601	0.221446	20	0.790698	0.19339	-33	-0.512662	0	0.5	2.56857	NA	0.119737	0.433735	-0.457828	0	1.78427	21.5	205630	24	-0.16407	1.38801	0.167687	snoRNA	dsim	8530425	wxd1_rep1
Dsim_2R:7288833-7288911	78	-6.29572	0.872972	0.99481	0.376639	19	0.782007	0.0692042	21.5	-0.245642	1730.1	0.461539	2.90054	NA	-33	0.6	-33	0	-33	22	3460.21	22	1.07391	1.2277	0.219723	snoRNA	dsim	8530425	wxd1_rep1
Dsim_2R:7289100-7289179	79	-6.12104	0.825182	0.989754	0.318429	19	0.772541	0.0717213	20	0.764719	2049.18	0.455696	2.74307	NA	-33	0.586956	-33	-11.8	-33	23.5	16393.4	13.5	0.0307987	2.46074	0.213115	snoRNA	dsim	8530425	wxd1_rep1
Dsim_2R:7289366-7289444	78	-2.09125	0.74967	0.647059	0.330017	18	0.294118	0.0647059	20	-0.333333	0	0.615385	2.1886	NA	-33	0.611765	-33	0	-33	23	35294.1	22	1.0693	-33	0.241176	snoRNA	dsim	8530425	wxd1_rep1
Dsim_2R:10030270-10030344	74	-5.82811	0.862782	0.995946	0.26105	18	0.562162	0.233784	19	-0.340366	0	0.513513	2.96696	NA	0	0.515464	-33	-13.7	-33	19	248649	10	2.59095	1.64533	0.212162	snoRNA	dsim	8530425	wxd1_rep1
Dsim_2R:12730324-12730405	81	-5.9184	0.915048	0.954253	0.282727	19	0.444588	0.385309	19	-0.36055	0	0.493827	2.8719	NA	0.25542	0.507463	-33	0	-33	23.3333	43814.4	4	-0.292993	2.58705	0.130799	snoRNA	dsim	8530425	wxd1_rep1
Dsim_2R:12730572-12730659	87	-5.379	0.906031	0.998428	0.291952	19	0.386006	0.420598	19	-0.544869	0	0.482759	2.84389	NA	-0.178174	0.456522	2.25242	0	0.57473	-33	-33	-33	-0.310244	1.42216	0.139151	snoRNA	dsim	8530425	wxd1_rep1
Dsim_2R:15220105-15220314	209	-19.7431	0.889623	0.9994	0.480397	19	0.0586352	0.43386	19	-0.629941	0	0.545454	2.98207	-54	-33	0.425532	-33	-22.5	-33	20.75	800.48	13	0.662046	0.883816	0.198919	snoRNA	dsim	8530425	wxd1_rep1
Dsim_2R:15222182-15222391	209	-19.7431	0.889623	0.9994	0.480397	19	0.0886532	0.225335	19	-0.764719	0	0.660287	2.9623	-68.7	0.408118	0.54902	-0.643006	-36.8	0.336986	20.5	1200.72	13	1.45271	1.79852	0.198919	snoRNA	dsim	8530425	wxd1_rep1
Dsim_2R:15770039-15770124	85	-4.31676	0.92056	0.992095	0.297706	26	0.142292	0.252964	-33	-33	0	0.494118	2.93217	-12.2	-33	0.526316	-33	0	-33	-33	-33	-33	0.195872	-33	0.383399	snoRNA	dsim	8530425	wxd1_rep1
Dsim_2R:15770286-15770366	80	-5.27218	0.895493	0.994444	0.287062	26	0.125	0.213889	-33	-33	0	0.375	2.75621	NA	-33	0.375	-33	0	-33	-33	-33	-33	1.08411	-33	0.247222	snoRNA	dsim	8530425	wxd1_rep1
Dsim_2R:15771457-15771542	85	-5.64238	0.869623	0.973799	0.327302	21	0.650655	0.200873	22	-0.333333	0	0.470588	2.94775	NA	-33	0.574713	-0.265485	-11.3	0.851703	-33	-33	-33	0.591764	-33	0.379913	snoRNA	dsim	8530425	wxd1_rep1
Dsim_2R:19350332-19350440	108	-5.58444	0.948542	0.992038	0.253626	21	0.106688	0.0684713	22	-0.528536	0	0.611111	2.27692	-30	-33	0.622641	-33	-30	-33	-33	-33	-33	1.2541	1.64533	0.230892	snoRNA	dsim	8530425	wxd1_rep1
Dsim_2R:19351863-19351993	130	-2.25689	0.944751	0.990196	0.43089	22	0.0882353	0.127451	-33	-33	0	0.553846	3.10552	-28.1	-0.333333	0.489796	-33	-22.2	-33	-33	-33	-33	1.53393	-33	0.421569	snoRNA	dsim	8530425	wxd1_rep1
Dsim_2R:19352006-19352139	133	-2.21133	0.877073	1	0.41672	24	0.177778	0.444444	-33	-33	0	0.631579	2.80355	-25.6	-33	0.56	-33	-18.9	-33	-33	-33	-33	2.90856	-33	0.733333	snoRNA	dsim	8530425	wxd1_rep1
Dsim_2R:19352159-19352303	144	-3.5107	0.775666	0.928571	0.46407	18	0.0714286	0.0178571	19	2.66667	35714.3	0.569444	2.9673	-38.5	-33	0.578313	-33	-21.7	-33	-33	-33	-33	-33	-33	0.446429	snoRNA	dsim	8530425	wxd1_rep1
Dsim_2R:19353366-19353474	108	-4.94223	0.874329	0.975124	0.425506	19	0.179104	0.174129	20	-33	0	0.481482	3.05981	-24.6	-33	0.556962	-0.333333	-23.4	0.54982	-33	-33	-33	1.16539	-33	0.472637	snoRNA	dsim	8530425	wxd1_rep1
Dsim_2R:19355266-19355397	131	-0.953325	0.986036	0.987654	0.377124	24	0.160494	0.0864198	-33	-33	0	0.48855	2.07601	-19.9	-33	0.545454	-0.497468	-15.6	0.0443948	23	24691.4	NA	2.13896	-33	0.506173	snoRNA	dsim	8530425	wxd1_rep1
Dsim_2R:19355414-19355552	138	-2.23342	0.883338	0.972603	0.360325	23	0.534247	0.315068	-33	-33	0	0.623188	2.34535	-31.2	1.1547	0.5	0.0875376	-13.7	0.0901253	21.5	82191.8	16.5	0.815934	-33	0.60274	snoRNA	dsim	8530425	wxd1_rep1
Dsim_2R:19355573-19355703	130	-3.69414	0.986159	0.99278	0.314879	23	0.0758123	0.155235	20	-0.333333	0	0.553846	2.26314	-26.9	-1.33333	0.617021	-0.600503	-18.5	-0.196525	20.75	14440.4	18	1.98738	-33	0.34296	snoRNA	dsim	8530425	wxd1_rep1
Dsim_2R:19355722-19355860	138	-1.87353	0.941253	0.970149	0.333544	25	0.641791	0.313433	-33	-33	0	0.57971	2.67346	-26.4	1.42134	0.536083	-33	-15	-33	21	29850.8	NA	-0.112028	2.35047	0.731343	snoRNA	dsim	8530425	wxd1_rep1
Dsim_2R:19355881-19356011	130	-3.37465	0.930449	0.985714	0.355684	23	0.15	0.142857	-33	-0.333333	0	0.523077	1.77118	-22.4	-33	0.565217	-0.905542	-13.3	-0.0708479	20.75	14285.7	15	0.361112	-33	0.614286	snoRNA	dsim	8530425	wxd1_rep1
Dsim_2R:19356050-19356187	137	-1.95419	0.903686	0.868421	0.390125	23	0.526316	0.157895	-33	-33	0	0.554744	2.72123	-28.6	-0.666667	0.521739	-0.503953	-20.2	0.739199	20.5	52631.6	NA	0.529198	2.35047	0.894737	snoRNA	dsim	8530425	wxd1_rep1
Dsim_2R:19356702-19356811	109	-6.70785	0.87741	0.97551	0.396157	19	0.240816	0.134694	19	-33	0	0.678899	3.00389	-23.1	-0.666667	0.678899	-0.503953	-22.6	0.49369	-33	-33	-33	2.03073	2.90856	0.526531	snoRNA	dsim	8530425	wxd1_rep1
Dsim_2R:22179522-22179661	139	-3.14682	0.833697	0.988636	0.43249	18	0.454545	0.147727	19	-0.333333	0	0.618705	3.1196	-47.8	-33	0.571429	-0.333333	-25.3	1.1293	-33	-33	-33	0.423744	-33	0.431818	snoRNA	dsim	8530425	wxd1_rep1
Dsim_2R:22180701-22180789	88	-5.85889	0.894636	0.994186	0.378546	20	0.473837	0.174419	-33	-33	0	0.545454	2.90602	-12.7	-33	0.545454	-33	-12.7	-33	22.5	8720.93	7	-0.704101	2.5555	0.343023	snoRNA	dsim	8530425	wxd1_rep1
Dsim_2R:22180951-22181036	85	-5.93912	0.892231	1	0.398856	25	0.224359	0.176282	-33	-33	0	0.517647	2.98361	-11.6	-33	0.52381	-33	-11.6	-33	-33	-33	-33	0.0307624	2.90856	0.387821	snoRNA	dsim	8530425	wxd1_rep1
Dsim_2R:22181182-22181270	88	-6.1785	0.897114	0.997041	0.383	25	0.426036	0.171598	-33	-33	0	0.636364	2.95811	-12.5	0.393178	0.613636	-0.41606	-12.5	1.0412	-33	-33	-33	-0.188663	2.9647	0.402367	snoRNA	dsim	8530425	wxd1_rep1
Dsim_2R:22181421-22181507	86	-6.00154	0.903542	1	0.376668	20	0.501348	0.148248	-33	-33	0	0.488372	2.77574	-10.8	-33	0.455696	0.111991	0	1.52992	-33	-33	-33	-0.343874	2.9647	0.318059	snoRNA	dsim	8530425	wxd1_rep1
Dsim_3L:859647-859721	74	-2.47402	0.836142	0.697987	0.252356	18	0.355705	0.483222	21	-0.361931	0	0.486486	2.6773	-11.2	-33	0.454545	-0.499919	0	0.767484	22.2857	13422.8	19	-0.152504	-33	0.315436	snoRNA	dsim	8530425	wxd1_rep1
Dsim_3L:859893-859966	73	-2.90998	0.850957	0.7	0.240775	18	0.344444	0.511111	21	-0.361931	0	0.383562	2.62663	NA	-33	0.482759	-33	0	-33	22.2857	11111.1	19	1.64533	-33	0.344444	snoRNA	dsim	8530425	wxd1_rep1
Dsim_3L:860120-860205	85	-3.60841	0.82021	0.79566	0.285784	18	0.788427	0.330922	-33	-33	0	0.4	3.1858	NA	-33	0.361446	2.66667	0	1.6473	19	433996	4	1.63671	-33	0.0958409	snoRNA	dsim	8530425	wxd1_rep1
Dsim_3L:860348-860429	81	-5.59145	0.818441	0.998239	0.272468	18	0.195422	0.408451	-33	-33	0	0	2.79814	NA	-33	0.470588	-0.335522	0	0.730964	-33	-33	-33	-0.0177874	-33	0.170775	snoRNA	dsim	8530425	wxd1_rep1
Dsim_3L:1650069-1650166	97	-2.27052	0.90779	0.955224	0.333677	20	0.134328	0.298507	19	-0.333333	0	0.515464	3.26401	-11.6	-33	0.543478	-33	-11	-33	-33	-33	-33	-33	-33	0.440298	snoRNA	dsim	8530425	wxd1_rep1
Dsim_3L:1650304-1650395	91	-4.65871	0.857532	0.986376	0.363135	18	0.147139	0.0790191	-33	-0.333333	0	0.571429	3.0567	-18.8	-33	0.531646	-33	-16.3	-33	20.5	59945.5	11	1.5349	-33	0.215259	snoRNA	dsim	8530425	wxd1_rep1
Dsim_3L:1650534-1650617	83	-5.54611	0.957595	0.996872	0.29161	23	0.778936	0.876955	19	2.66667	7299.27	0.506024	2.90856	-10	-33	0.538462	-33	-10	-33	-33	-33	-33	0.234127	2.9647	0.141814	snoRNA	dsim	8530425	wxd1_rep1
Dsim_3L:3190769-3190843	74	-3.90139	0.973939	0.998993	0.329669	21	0.250755	0.749245	22	-0.333967	0	0	1.8758	NA	-33	0.468085	-33	0	-33	25	2014.1	25	-0.0779406	3.00327	0.131923	snoRNA	dsim	8530425	wxd1_rep1
Dsim_3L:3190983-3191056	73	-4.162	0.974056	0.999002	0.330021	21	0.249501	0.749501	22	-0.333963	0	0	1.87637	NA	-33	0.425532	-33	0	-33	25	1996.01	25	-0.0779406	3.00327	0.139721	snoRNA	dsim	8530425	wxd1_rep1
Dsim_3L:3191194-3191266	72	-1.94248	0.936633	1	0.354728	23	0.554455	0.113861	-33	-33	0	0	2.92149	-10.5	-33	0.40625	-33	-10.5	-33	-33	-33	-33	0.378101	2.90856	0.341584	snoRNA	dsim	8530425	wxd1_rep1
Dsim_3L:12845877-12845947	70	-8.69626	0.868057	1	0.264935	19	0.0863436	0.136564	-33	-33	0	0.685714	2.68881	NA	-33	0.632911	-33	-14.6	-33	-33	-33	-33	0.316141	-33	0.162114	snoRNA	dsim	8530425	wxd1_rep1
Dsim_3L:12846527-12846597	70	-6.09171	0.884965	0.998747	0.311329	19	0.130326	0.0877193	19	-0.391618	0	0.571429	2.68828	-10.2	0.42543	0.526316	-0.270343	-10.2	0.933155	-33	-33	-33	0.430734	-33	0.18421	snoRNA	dsim	8530425	wxd1_rep1
Dsim_3L:12867954-12868096	142	-2.74093	0.907987	0.991735	0.35796	22	0.272727	0.239669	-33	-33	0	0.591549	3.05941	-40	1.33333	0.424242	-33	-13.4	-33	-33	-33	-33	2.88647	-33	0.454545	snoRNA	dsim	8530425	wxd1_rep1
Dsim_3L:12868147-12868289	142	-3.70518	0.893874	0.973913	0.361824	22	0.304348	0.243478	19	-0.471405	0	0.591549	3.05525	-38.8	-33	0.506024	-33	-12.5	-33	20.25	17391.3	15	2.03364	-33	0.452174	snoRNA	dsim	8530425	wxd1_rep1
Dsim_3L:12868573-12868715	142	-2.67578	0.973398	0.994859	0.416316	22	0.269923	0.105399	-33	-33	0	0.605634	2.74929	-38.3	-33	0.522727	-0.333333	-22.6	1.63397	-33	-33	-33	0.219083	-33	0.195373	snoRNA	dsim	8530425	wxd1_rep1
Dsim_3L:20189854-20189939	85	-5.90174	0.823839	0.966171	0.339063	18	0.322057	0.0933694	20	-0.471405	0	0.423529	2.77305	-10.4	-33	0.607595	-33	-14.2	-33	19.5	4059.54	20	-0.249707	2.35047	0.184032	snoRNA	dsim	8530425	wxd1_rep1
Dsim_3L:20190097-20190183	86	-5.65119	0.848494	0.99823	0.325692	18	0.617699	0.0831858	-33	-33	0	0.395349	2.64609	NA	-33	0.417582	-33	0	-33	-33	-33	-33	-0.278346	3.39405	0.214159	snoRNA	dsim	8530425	wxd1_rep1
Dsim_3L:20190338-20190424	86	-5.44903	0.894999	0.986577	0.328945	23	0.567785	0.0684564	-33	-33	0	0.44186	2.65951	-10.7	-33	0.4	-33	-10.7	-33	-33	-33	-33	-0.550332	2.89735	0.186577	snoRNA	dsim	8530425	wxd1_rep1
Dsim_3L:20190592-20190678	86	-5.36962	0.874858	0.996198	0.332683	23	0.739544	0.0874525	-33	-33	0	0.44186	2.67935	-10.5	-33	0.391753	-33	-10.5	-33	-33	-33	-33	-0.135986	2.9647	0.228137	snoRNA	dsim	8530425	wxd1_rep1
Dsim_3L:22551600-22551683	83	-4.9658	0.915382	0.977982	0.432755	22	0.0348624	0.0807339	22	-0.333333	0	0.361446	3.3247	NA	-33	0.458333	-33	0	-33	23	187156	4	1.64533	-33	0.238532	snoRNA	dsim	8530425	wxd1_rep1
Dsim_3L:23874220-23874288	68	-7.83903	0.844881	0.999339	0.332283	19	0.0489418	0.173942	-33	-33	0	0	2.6484	-13.4	-33	0.517647	-33	-14.8	-33	-33	-33	-33	1.06126	-33	0.098545	snoRNA	dsim	8530425	wxd1_rep1
Dsim_3R:4399818-4400132	314	-0.913274	0.917368	0.939394	0.423453	20	0.181818	0.454545	-33	-33	0	0	2.96815	-98.8	-33	0	-33	0	-33	21.5	242424	10	-33	-33	0.818182	snoRNA	dsim	8530425	wxd1_rep1
Dsim_3R:15415120-15415200	80	-5.54454	0.923796	0.995223	0.404321	23	0.0254777	0.14172	20	-0.379516	0	0.45	3.39405	-11.5	2.66667	0.515464	-0.503003	-13.3	0.236825	23.5	3184.71	19	1.39671	1.64533	0.245223	snoRNA	dsim	8530425	wxd1_rep1
Dsim_3R:15415555-15415633	78	-7.09696	0.789949	1	0.343412	18	0.184382	0.558568	-33	-33	0	0	2.24801	-10.3	-33	0.367816	-0.764719	0	-0.125167	-33	-33	-33	1.15308	-33	0.163774	snoRNA	dsim	8530425	wxd1_rep1
Dsim_3R:17252992-17253070	78	-8.90678	0.816078	0.973057	0.333054	18	0.0963731	0.224871	19	2.66348	105700	0.461539	2.91274	-11.7	-33	0.533333	-33	-13	-33	19	213472	10	1.34209	2.35047	0.19171	snoRNA	dsim	8530425	wxd1_rep1
Dsim_3R:17254046-17254123	77	-9.92076	0.795926	0.998495	0.344653	19	0.0707299	0.154251	20	-0.354928	0	0	2.52354	-13.3	-33	0.52381	-33	-16.2	-33	-33	-33	-33	1.04286	2.90856	0.145974	snoRNA	dsim	8530425	wxd1_rep1
Dsim_3R:26560564-26560609	45	-3.63153	0.883461	0.998305	0.399247	19	0.528814	0.232203	20	-0.333333	0	0.488889	3.00316	NA	-33	0.454545	-33	0	-33	-33	-33	-33	1.44825	1.64533	0.167797	snoRNA	dsim	8530425	wxd1_rep1
Dsim_3R:26894802-26894938	136	-5.22403	0.849042	0.984849	0.403125	23	0.348485	0.522727	-33	-0.333333	0	0	3.23798	-30.8	-33	0.55814	-33	-15.4	-33	-33	-33	-33	0.331778	-33	0.507576	snoRNA	dsim	8530425	wxd1_rep1
Dsim_3R:26894978-26895113	135	-3.52565	0.861201	1	0.43608	18	0.0909091	0.353535	-33	-33	0	0	2.70027	-38.7	-33	0.54902	-33	-30.7	-33	-33	-33	-33	2.73274	1.64533	0.585859	snoRNA	dsim	8530425	wxd1_rep1
Dsim_3R:26895144-26895280	136	-4.49497	0.894313	1	0.41833	18	0.0529801	0.675497	-33	-33	0	0	3.19598	-46.2	-0.503953	0.534884	-0.404626	-22.3	0.547656	-33	-33	-33	2.71163	-33	0.503311	snoRNA	dsim	8530425	wxd1_rep1
Dsim_3R:26895315-26895453	138	-3.9628	0.872584	0.956522	0.461666	18	0.0217391	0.391304	19	-0.471405	0	0.57971	2.88066	-41.4	-33	0.608696	-33	-26.5	-33	19.6667	21739.1	16	1.64533	-33	0.695652	snoRNA	dsim	8530425	wxd1_rep1
Dsim_U_27:14270-14342	72	-3.95773	0.945158	1	0.447424	23	0.729032	0.0419355	-33	-33	0	0.638889	2.87271	-16.8	0.333333	0.597403	-0.348662	-16.8	1.05438	-33	-33	-33	-0.0475669	0.963694	0.296774	snoRNA	dsim	8530425	wxd1_rep1
Dsim_X:1321383-1321478	95	-4.55875	0.949211	0.996051	0.430846	26	0.0128332	0.00987167	20	-1.11832	0	0.610526	2.88146	-21.3	-33	0.409091	-33	0	-33	20	1974.33	15	1.422	-33	0.123396	snoRNA	dsim	8530425	wxd1_rep1
Dsim_X:16641944-16642081	137	-4.3659	0.823838	0.998567	0.306126	18	0.67765	0.0329513	-33	-33	0	0	2.1079	-21.1	-33	0.524272	-33	-15.3	-33	-33	-33	-33	1.30682	-33	0.146132	snoRNA	dsim	8530425	wxd1_rep1
1:79491457-79491582	125	-2.98515	0.93752	0.976077	0.379829	24	0.239234	0.205742	33	-0.333333	0	0.576	2.58923	-28.8	-33	0.6	-33	-22.4	-33	-33	-33	-33	2.22532	-33	0.425837	snoRNA	mouse	3849069296	(SRR13848060-SRR13848062, SRR24821465,SRR24821466,SRR24821469,SRR24821470)
1:10012689-10012775	86	-6.03659	0.990897	0.999527	0.397064	22	0.763361	0.483998	-33	-33	0	0.465116	1.64533	-18.4	-33	0.45	-33	-13.8	-33	-33	-33	-33	2.96821	2.70919	0.0556519	snoRNA	mouse	3849069296	(SRR13848060-SRR13848062, SRR24821465,SRR24821466,SRR24821469,SRR24821470)
1:153315826-153315965	139	-3.23994	0.894667	0.964912	0.367251	21	0.377193	0.219298	-33	-33	0	0.633093	2.87149	-40.2	1.09238	0.659794	-0.0230425	-31	1.99829	-33	-33	-33	-0.434889	2.01605	0.447368	snoRNA	mouse	3849069296	(SRR13848060-SRR13848062, SRR24821465,SRR24821466,SRR24821469,SRR24821470)
1:10991895-10991985	90	-0.473163	0.795581	0.909091	0.483923	18	0	0.727273	-33	-33	0	0.511111	2.39311	-23.2	-33	0	-33	0	-33	-33	-33	-33	-33	-33	0.727273	snoRNA	mouse	3849069296	(SRR13848060-SRR13848062, SRR24821465,SRR24821466,SRR24821469,SRR24821470)
1:39558615-39558829	214	-31.0579	0.905133	0.9997	0.552346	21	0.303109	0.174148	19	-0.266667	19.4966	0.635514	2.73274	-80.8	1.27151	0.652174	-33	-31.1	-33	20	155.973	15	1.55689	2.01084	0.0507107	snoRNA	mouse	3849069296	(SRR13848060-SRR13848062, SRR24821465,SRR24821466,SRR24821469,SRR24821470)
1:39558615-39558830	215	-31.0579	0.905133	0.9997	0.552346	21	0.303109	0.174148	19	-0.266667	19.4966	0.632558	2.73274	-80.8	1.27151	0.652174	-33	-31.1	-33	20	155.973	15	1.55689	2.01084	0.0507107	snoRNA	mouse	3849069296	(SRR13848060-SRR13848062, SRR24821465,SRR24821466,SRR24821469,SRR24821470)
HE587870:2387-2456	69	-16.5906	0.984819	0.918695	0.366217	27	0.259623	0.256224	22	-0.516099	30814.6	0.608696	2.30091	-15.7	0.581632	0.44898	1.02075	-20.5	2.01043	22	425330	23	1.2035	0.850093	0.0647553	snoRNA	spidermite	2023667092	all_spidermite (SRR10513013-SRR10513019)
HE587301:839340-839471	131	-3.05515	0.880495	0.955556	0.471222	28	0.233333	0.233333	19	-33	0	0.549618	3.00773	-33.1	-33	0.606061	-33	-27.1	-33	24.5	222222	7	1.05944	-33	0.455556	snoRNA	spidermite	2023667092	all_spidermite (SRR10513013-SRR10513019)
HE587303:321265-321335	70	-3.75525	0.963963	0.987325	0.347827	21	0.0655594	0.0463287	21	-0.364915	0	0.4	2.40043	NA	-33	0.568182	-33	-13.8	-33	20	99650.4	11	2.22532	-33	0.0515734	snoRNA	spidermite	2023667092	all_spidermite (SRR10513013-SRR10513019)
HE587306:453284-453357	73	-4.56269	0.863084	0.957245	0.329506	32	0.420428	0.175772	31	-0.7698	0	0.438356	2.06856	NA	1.33333	0.574713	-0.333333	-10.8	1.72861	21.5	90261.3	4	1.87923	-33	0.273159	snoRNA	spidermite	2023667092	all_spidermite (SRR10513013-SRR10513019)
HE587309:782583-782657	74	-3.98123	0.850175	0.965739	0.366378	20	0.0985011	0.147752	-33	-0.333333	0	0.567568	2.38557	NA	-33	0.567164	-33	0	-33	-33	-33	-33	-33	-33	0.0899358	snoRNA	spidermite	2023667092	all_spidermite (SRR10513013-SRR10513019)
HE587317:863771-863985	214	-35.4361	0.903188	0.726744	0.451549	22	0.281177	0.20625	23	0.260389	83195.8	0.682243	2.91541	-74.8	-0.0647891	0.660194	-33	-36.3	-33	21.5	567747	9	0.262999	-1.19871	0.0634949	snoRNA	spidermite	2023667092	all_spidermite (SRR10513013-SRR10513019)
HE587318:253288-253357	69	-15.8702	0.985433	0.921234	0.365462	27	0.257393	0.251405	22	-0.528157	20835.2	0.608696	2.3062	-14.7	-0.839505	0.44	-0.688917	-19.5	2.01321	22	419603	23	1.1956	0.850093	0.0606033	snoRNA	spidermite	2023667092	all_spidermite (SRR10513013-SRR10513019)
HE587318:1293147-1293351	204	-30.6173	0.906347	0.777968	0.429208	22	0.211218	0.532052	23	-0.270378	129282	0.598039	2.80408	-51.7	-0.666667	0.55102	-33	-18.4	-33	19.5	375842	5	1.05251	1.4689	0.0900391	snoRNA	spidermite	2023667092	all_spidermite (SRR10513013-SRR10513019)
HE587329:105196-105268	72	-2.77444	0.882348	0.986111	0.265969	25	0.291667	0.75	20	-0.333333	0	0	0.613352	NA	-33	0.419753	-33	0	-33	25	41666.7	21	2.51932	2.73274	0.430556	snoRNA	spidermite	2023667092	all_spidermite (SRR10513013-SRR10513019)
HE587330:192526-192598	72	-4.44932	0.882411	0.936275	0.358424	26	0.627451	0.166667	27	-0.388955	0	0.388889	3.01828	NA	-0.438397	0.430769	-0.333333	0	-0.0150375	20.5	176471	8	1.72271	1.45744	0.303922	snoRNA	spidermite	2023667092	all_spidermite (SRR10513013-SRR10513019)
Dsim_X:20804045-20804139	94	-17.5916	0.796635	0.996984	0.52127	18	0.190684	0.580094	20	-0.109422	2345.84	0.531915	2.93548	-21.7	-33	0.485437	-0.333333	-21.8	0.135542	20	8378.02	30	-0.031527	-33	0.129692	tRNA	dsim	8530425	wxd1_rep1
Dsim_X:20807210-20816609	9399	-20.9411	0.737979	0.707042	0.436697	18	0.140845	0.243662	23	1.48274	125352	0.633897	3.16936	-2904.2	0.611775	0	-33	0	-33	20	14084.5	14	3.00327	-33	0.443662	tRNA	dsim	8530425	wxd1_rep1
Dsim_X:20723208-20723276	68	-14.5975	0.852702	0.999413	0.594805	18	0.232394	0.281103	20	-33	0	0	2.54938	-14.7	-33	0.380952	-33	0	-33	20.5	8215.96	8	-0.08952	-33	0.237089	tRNA	dsim	8530425	wxd1_rep1
Dsim_X:20723964-20724036	72	-14.1022	0.819079	0.999265	0.52187	20	0.0742647	0.179412	-33	-0.333333	0	0.611111	2.93406	-24.2	-33	0.630435	-33	-30.7	-33	-33	-33	-33	1.65457	-33	0.256618	tRNA	dsim	8530425	wxd1_rep1
NC_004354.4:6744472-6744544	72	-2.84262	0.940207	0.999459	0.498587	25	0.314046	0.56577	22	0.803526	3109.37	0.611111	2.95681	-28.5	-33	0.586207	-33	-31.5	-33	21	405.57	20	2.89656	-33	0.00770583	tRNA	dmel	192595761	ovary_v097
NT_033779.5:2009156-2009227	71	-4.99502	0.871163	0.998749	0.45461	19	0.247603	0.544393	20	-0.229885	2084.2	0.591549	2.51261	-21	-33	0.604167	-33	-27.1	-33	25.5	10004.2	5	1.45755	3.39405	0.0462693	tRNA	dmel	192595761	ovary_v097
NT_033779.5:2009539-2009610	71	-4.47749	0.873662	0.998374	0.51183	19	0.323577	0.403252	20	-0.229885	2710.03	0.591549	2.51261	-21	-33	0.568627	-33	-25.4	-33	25.5	13008.1	5	1.14503	-33	0.0601626	tRNA	dmel	192595761	ovary_v097
NT_037436.4:1398407-1398478	71	-4.97751	0.823051	0.9995	0.382539	19	0.124238	0.715542	25	-0.207726	159.329	0.591549	2.68499	-24.1	-0.544331	0.606061	-0.462942	-24.1	0.26174	26	13702.3	8	2.62651	2.78829	0.0103564	tRNA	dmel	192595761	ovary_v097
NT_037436.4:1401441-1401512	71	-5.51555	0.982673	0.9998	0.369199	21	0.0388922	0.0154969	25	-0.213395	17.3016	0.591549	2.37343	-24.1	1.63785	0.537634	-0.372586	-27.4	2.16783	26	242.223	15.5	1.87973	3.00327	0.00359874	tRNA	dmel	192595761	ovary_v097
NT_037436.4:1401782-1401853	71	-5.09962	0.866316	0.999702	0.6084	18	0.357898	0.127885	25	-0.318507	446.628	0.591549	2.4598	-24.1	-0.344265	0.453608	0.420522	-25.7	-0.154522	26	9230.31	15.5	2.64159	1.81195	0.0296263	tRNA	dmel	192595761	ovary_v097
NT_037436.4:1925642-1925713	71	-0.831702	0.739644	1	0.653307	24	0	0.00943396	-33	-33	0	0.591549	2.64457	-25.5	-33	0	-33	0	-33	-33	-33	-33	-33	-33	0.122642	tRNA	dmel	192595761	ovary_v097
NC_004354.4:3819700-3819771	71	-8.37001	0.864418	1	0.526822	20	0.246572	0.121308	-33	-33	0	0.591549	2.7021	-21	1.76383	0.591549	-0.333333	-21	1.56434	-33	-33	-33	2.567	2.41165	0.0727848	tRNA	dmel	283063946	bonini_head_3d_wt SRR1042488
NC_004354.4:3827623-3827694	71	-3.52575	0.796481	1	0.604909	19	0.234043	0.0319149	-33	-33	0	0.56338	3.2826	-24	-33	0.56	-33	-27.3	-33	-33	-33	-33	2.11263	-33	0.404255	tRNA	dmel	283063946	bonini_head_3d_wt SRR1042489
NC_004354.4:6516975-6517047	72	-4.90645	0.726701	0.994751	0.505803	18	0.0166229	0.0271216	19	-0.503953	0	0.527778	2.88167	-20.3	-33	0.612903	-33	-20.3	-33	24.75	3499.56	9	2.29556	-33	0.0621172	tRNA	dmel	283063946	bonini_head_3d_wt SRR1042490
NC_004354.4:6744472-6744544	72	-4.90645	0.726701	0.994751	0.505803	18	0.109361	0.0454943	19	-0.503953	0	0.611111	2.88167	-28.5	-33	0.621622	-33	-28.6	-33	24.75	2624.67	9	0.779811	-33	0.0621172	tRNA	dmel	283063946	bonini_head_3d_wt SRR1042491
NC_004354.4:14014815-14014887	72	-6.03067	0.966939	0.988774	0.520431	21	0.0854922	0.189983	23	-0.538195	6908.46	0.611111	2.85524	-24.2	-33	0.577778	-33	-25	-33	23	518135	10	3.27142	-33	0.0863558	tRNA	dmel	283063946	bonini_head_3d_wt SRR1042492
NC_004354.4:14015046-14015127	81	-3.30051	0.75595	1	0.577112	18	0.0132696	0.0116773	-33	-33	0	0.641975	2.03519	-29.2	-33	0.641975	-33	-29.2	-33	-33	-33	-33	3.18492	-33	0.0424629	tRNA	dmel	283063946	bonini_head_3d_wt SRR1042493
NC_004354.4:14015446-14015527	81	-3.22964	0.756108	1	0.576967	18	0.0132626	0.0116711	-33	-33	0	0.617284	2.03508	-28.6	-33	0.625	-33	-28.6	-33	-33	-33	-33	3.18492	-33	0.0429708	tRNA	dmel	283063946	bonini_head_3d_wt SRR1042494
NC_004354.4:14016204-14016276	72	-5.58488	0.966942	0.988656	0.519711	21	0.0863874	0.191972	23	-0.538195	6980.8	0.638889	2.85662	-23.3	-33	0.487805	-33	-10.4	-33	23	523560	10	3.27142	-33	0.0811518	tRNA	dmel	283063946	bonini_head_3d_wt SRR1042495
NC_004354.4:14016809-14016881	72	-5.58488	0.966942	0.988656	0.519711	21	0.0863874	0.191972	23	-0.538195	6980.8	0.638889	2.85662	-23.3	-33	0.487805	-33	-10.4	-33	23	523560	10	3.27142	-33	0.0811518	tRNA	dmel	283063946	bonini_head_3d_wt SRR1042496
NC_004354.4:14017011-14017083	72	-5.58488	0.966942	0.988656	0.519711	21	0.0863874	0.191972	23	-0.538195	6980.8	0.638889	2.85662	-23.3	-33	0.487805	-33	-10.4	-33	23	523560	10	3.27142	-33	0.0811518	tRNA	dmel	283063946	bonini_head_3d_wt SRR1042497
NC_004354.4:14017213-14017285	72	-5.58488	0.966942	0.988656	0.519711	21	0.0863874	0.191972	23	-0.538195	6980.8	0.583333	2.85662	-23.1	-33	0.487805	-33	-10.4	-33	23	523560	10	3.27142	-33	0.0811518	tRNA	dmel	283063946	bonini_head_3d_wt SRR1042498
NC_004354.4:14025110-14025191	81	-3.3261	0.729425	1	0.710017	18	0.0070632	0.119331	-33	-33	0	0	1.69161	-25.1	-0.503953	0.617284	-0.557773	-25.1	-0.202625	-33	-33	-33	2.87814	-33	0.0106567	tRNA	dmel	283063946	bonini_head_3d_wt SRR1042499
NC_004354.4:14025567-14025648	81	-4.54064	0.725171	0.999624	0.710309	18	0.00715002	0.112644	19	-0.503953	0	0.641975	2.15361	-30.2	-33	0.641975	-0.471405	-30.2	-0.202929	-33	-33	-33	2.87814	-33	0.00915705	tRNA	dmel	283063946	bonini_head_3d_wt SRR1042500
NC_004354.4:14070642-14070723	81	-3.12275	0.756158	1	0.57711	18	0.0127321	0.0122016	-33	-33	0	0.617284	2.03509	-27.8	-0.333333	0.609756	-0.333333	-27.8	-0.255809	-33	-33	-33	-33	-33	0.0429708	tRNA	dmel	283063946	bonini_head_3d_wt SRR1042501
NC_004354.4:14103364-14103445	81	-3.30051	0.75595	1	0.577112	18	0.0196391	0.608811	-33	-33	0	0	2.03519	-25.1	-0.547997	0.617284	-0.176218	-25.1	-0.255608	-33	-33	-33	2.05966	-33	0.0424629	tRNA	dmel	283063946	bonini_head_3d_wt SRR1042502
NC_004354.4:14103720-14103792	72	-2.53161	0.954869	0.944701	0.494416	22	0.0552995	0.488479	20	-0.552379	9216.59	0.583333	2.60816	-27.3	-33	0.56	-33	-27.1	-33	23	294931	10	2.01605	-33	0.299539	tRNA	dmel	283063946	bonini_head_3d_wt SRR1042503
NC_004354.4:14104650-14104731	81	-3.31891	0.729459	1	0.710002	18	0.00309751	0.00284971	-33	-33	0	0.617284	1.69028	-28.7	-33	0.617284	-33	-28.7	-33	-33	-33	-33	3.18492	-33	0.0107793	tRNA	dmel	283063946	bonini_head_3d_wt SRR1042504
NC_004354.4:14117730-14117811	81	-4.54064	0.725171	0.999624	0.710309	18	0.00715002	0.112644	19	-0.503953	0	0.641975	2.15361	-30.2	-33	0.641975	-0.471405	-30.2	-0.202929	-33	-33	-33	2.87814	-33	0.00915705	tRNA	dmel	283063946	bonini_head_3d_wt SRR1042505
NC_004354.4:18565765-18565836	71	-3.10077	0.834023	1	0.414155	19	0.118834	0.419283	-33	-33	0	0.56338	2.50443	-26.5	-33	0.595745	-33	-28.1	-33	-33	-33	-33	1.63661	-33	0.156951	tRNA	dmel	283063946	bonini_head_3d_wt SRR1042506
NC_004354.4:20025100-20025171	71	-4.8315	0.860335	0.904891	0.568249	20	0.423913	0.233696	19	-0.471405	0	0.619718	2.97912	-26.9	-33	0.594595	-33	-26.9	-33	21	1347826	12	1.49956	-33	0.211956	tRNA	dmel	283063946	bonini_head_3d_wt SRR1042507
NC_004354.4:21231326-21231400	74	-2.24994	0.872325	1	0.598639	20	0.0125	0.025	-33	-33	0	0	2.24337	-17.8	-33	0.372093	-33	0	-33	-33	-33	-33	-33	-33	0.2625	tRNA	dmel	283063946	bonini_head_3d_wt SRR1042508
NC_004354.4:21232092-21232164	72	-5.73459	0.967034	0.987002	0.519883	21	0.0857886	0.190641	23	-0.538195	6932.41	0.611111	2.85624	-24.2	-33	0.607595	-33	-30.7	-33	23	519931	10	3.27142	-33	0.0857886	tRNA	dmel	283063946	bonini_head_3d_wt SRR1042509
NC_004354.4:21304442-21304536	94	-6.11383	0.767774	0.994832	0.506147	18	0.139535	0.235142	19	-0.349262	0	0	2.07494	-21.7	-33	0.5	-0.333333	-21.8	-0.209556	19.5	15503.9	23	2.27155	-33	0.183463	tRNA	dmel	283063946	bonini_head_3d_wt SRR1042510
NC_004354.4:21304714-21304821	107	-3.17409	0.746649	0.988235	0.503815	18	0.109804	0.0313725	19	-0.349262	0	0.579439	2.22532	-29.9	-33	0.593407	-33	-22.7	-33	19.5	23529.4	23	3.19256	-33	0.141177	tRNA	dmel	283063946	bonini_head_3d_wt SRR1042511
NT_033779.5:1938090-1938160	70	-10.3095	0.920057	0.9995	0.571887	25	0.00669665	0.202799	33	-0.142134	61.6409	0.657143	2.59592	-30.5	-33	0.657143	-0.421836	-30.5	-0.212998	20	308.204	17	0.796926	-33	0.0182457	tRNA	dmel	283063946	bonini_head_3d_wt SRR1042512
NT_033779.5:1965427-1965499	72	2	0.520493	1	0.516908	18	0	0	-33	-33	0	0	-33	0	-33	0.409091	-33	0	-33	-33	-33	-33	-33	-33	1	tRNA	dmel	283063946	bonini_head_3d_wt SRR1042513
NT_033779.5:2009156-2009227	71	-8.70059	0.84848	1	0.493639	19	0.215587	0.231266	-33	-33	0	0.591549	2.5411	-21	1.76383	0.593407	-0.333333	-21.1	1.0924	-33	-33	-33	2.567	2.41165	0.0647913	tRNA	dmel	283063946	bonini_head_3d_wt SRR1042514
NT_033779.5:2009539-2009610	71	-8.19345	0.865308	1	0.526057	20	0.246723	0.121395	-33	-33	0	0.591549	2.70452	-21	1.76383	0.488372	-33	-22.4	-33	-33	-33	-33	2.44078	1.74229	0.0757735	tRNA	dmel	283063946	bonini_head_3d_wt SRR1042515
NT_033779.5:2010647-2010718	71	-8.43428	0.86441	1	0.526815	20	0.0896388	0.10493	-33	-33	0	0	2.70218	-23.6	-0.503953	0.575342	1.81845	-24.3	1.56788	-33	-33	-33	1.10225	-33	0.0730293	tRNA	dmel	283063946	bonini_head_3d_wt SRR1042516
NT_033779.5:2010870-2010941	71	-8.1208	0.864143	0.999739	0.521494	20	0.0904339	0.101934	21	-33	0	0	2.71291	-21.6	-33	0.54054	0.764719	-21.6	1.61667	-33	-33	-33	2.04889	1.64533	0.0695243	tRNA	dmel	283063946	bonini_head_3d_wt SRR1042517
NT_033779.5:2013180-2013251	71	-8.42907	0.864503	1	0.526741	20	0.0895444	0.105346	-33	-33	0	0	2.70264	-24.1	0.933799	0.528736	2.66667	-25.3	1.56783	-33	-33	-33	1.10225	-33	0.0737424	tRNA	dmel	283063946	bonini_head_3d_wt SRR1042518
NT_033779.5:2031693-2031763	70	-10.3256	0.920052	0.9995	0.571842	25	0.105947	0.10055	33	-0.258199	61.6295	0.685714	2.59592	-30.5	-33	0.666667	-33	-30.5	-33	20	246.518	29	2.5867	2.90856	0.0182423	tRNA	dmel	283063946	bonini_head_3d_wt SRR1042519
NT_033779.5:2459925-2460045	120	-5.98478	0.761721	0.994475	0.50709	18	0.151934	0.19337	19	-0.349262	0	0	2.05798	-36.4	-33	0.576271	-33	-30.7	-33	19.5	16574.6	23	1.64533	-33	0.185083	tRNA	dmel	283063946	bonini_head_3d_wt SRR1042520
NT_033779.5:2462594-2462687	93	-5.91898	0.763131	0.994506	0.506147	18	0.134615	0.0274725	19	-0.349262	0	0.580645	2.05445	-27.6	-33	0.54945	-33	-23.6	-33	19.5	16483.5	23	0.862782	2.35047	0.186813	tRNA	dmel	283063946	bonini_head_3d_wt SRR1042521
NT_037436.4:8065644-8065726	82	-5.45893	0.935879	0.994744	0.608056	26	0.0597898	0.136005	-33	-33	0	0.536585	2.31969	-24.6	-33	0.52381	-0.277977	-24.6	-0.10867	21.75	1314.06	5	0.752412	-33	0.064389	tRNA	dmel	283063946	bonini_head_3d_wt SRR1042522
NT_037436.4:8065995-8066077	82	-5.45893	0.935879	0.994744	0.608056	26	0.0597898	0.136005	-33	-33	0	0.536585	2.31969	-25.1	-33	0.547619	-0.277977	-25.2	-0.10867	21.75	1314.06	5	0.752412	-33	0.064389	tRNA	dmel	283063946	bonini_head_3d_wt SRR1042523
NT_037436.4:8068209-8068291	82	-5.3387	0.935999	0.994737	0.608264	26	0.0585526	0.134868	-33	-33	0	0.536585	2.31969	-24.2	-33	0.536585	-0.277977	-24.2	-0.108655	21.75	1315.79	5	0.825059	-33	0.0638158	tRNA	dmel	283063946	bonini_head_3d_wt SRR1042524
NT_037436.4:8903350-8903423	73	2	0.594031	1	0.596838	22	0	0	-33	-33	0	0.520548	-33	-19	-33	0	-33	0	-33	-33	-33	-33	-33	-33	0.666667	tRNA	dmel	283063946	bonini_head_3d_wt SRR1042525
NT_037436.4:11801472-11801543	71	-8.52996	0.849412	0.999001	0.486327	22	0.0574139	0.0968547	25	-0.333333	0	0	2.24492	-21.5	-33	0.65	-0.154046	-22.6	1.66218	21.5	23464.8	11	2.22603	1.64533	0.0768847	tRNA	dmel	283063946	bonini_head_3d_wt SRR1042526
NT_037436.4:13211215-13211286	71	-2.97899	0.985594	0.974692	0.528247	27	0.212038	0.0143639	25	-0.494633	0	0.619718	1.95366	-26.1	-33	0.605263	-33	-29.4	-33	21	339261	12	-0.0100694	2.35047	0.0526676	tRNA	dmel	283063946	bonini_head_3d_wt SRR1042527
NT_037436.4:13211552-13211623	71	-2.97899	0.985594	0.974692	0.528247	27	0.212038	0.0143639	25	-0.494633	0	0.619718	1.95366	-26.1	-33	0.605263	-33	-29.4	-33	21	339261	12	-0.0100694	2.35047	0.0526676	tRNA	dmel	283063946	bonini_head_3d_wt SRR1042528
NT_037436.4:13212366-13212437	71	-2.82854	0.985708	0.974675	0.528213	27	0.212183	0.0143737	25	-0.494633	0	0.619718	1.95366	-26.1	-33	0.60274	-33	-26.1	-33	21	339494	12	-0.0100694	2.35047	0.0520192	tRNA	dmel	283063946	bonini_head_3d_wt SRR1042529
NT_037436.4:13214110-13214234	124	-2.86149	0.825535	1	0.655866	18	0.0673712	0.0369881	-33	-33	0	0.612903	2.4931	-40.1	-0.843274	0.654206	-33	-31.4	-33	-33	-33	-33	3.13942	1.64533	0.101717	tRNA	dmel	283063946	bonini_head_3d_wt SRR1042530
NT_037436.4:13249548-13249619	71	-7.52924	0.82481	0.998602	0.601463	19	0.1427	0.0461354	23	-0.0623707	222	0.619718	2.85133	-26	0.907393	0.594595	-1.11115	-26	0.289921	22.5	5550.01	11	2.12774	3.09416	0.014985	tRNA	dmel	283063946	bonini_head_3d_wt SRR1042531
NT_037436.4:13433049-13433121	72	-3.28014	0.853517	1	0.678458	18	0.101539	0.0184615	-33	-33	0	0.611111	2.93933	-22.2	-0.333333	0.528736	-33	-26.3	-33	-33	-33	-33	3.13942	-33	0.156923	tRNA	dmel	283063946	bonini_head_3d_wt SRR1042532
NT_037436.4:13433647-13433719	72	-3.35623	0.852828	1	0.679478	18	0.570988	0.0493827	-33	-33	0	0	2.93909	-27	-0.199532	0.555556	0.615223	-27	1.89562	-33	-33	-33	-33	-33	0.154321	tRNA	dmel	283063946	bonini_head_3d_wt SRR1042533
NT_037436.4:14673943-14674014	71	-6.11863	0.789577	0.996469	0.650444	31	0.0353107	0.101695	22	1.97911	3531.07	0.704225	2.84426	-26.3	-33	0.704225	1.17851	-26.3	0.134083	24	19774	14	2.00836	1.64533	0.0967514	tRNA	dmel	283063946	bonini_head_3d_wt SRR1042534
NT_037436.4:14674345-14674416	71	-6.09886	0.790029	0.996481	0.64956	31	0.0394089	0.0809289	22	1.97911	3518.65	0.676056	2.84344	-26.2	-1.13707	0.62	-0.260192	-33.3	0.125623	24	36593.9	14	1.95051	3.39405	0.0978184	tRNA	dmel	283063946	bonini_head_3d_wt SRR1042535
NT_037436.4:16222032-16222104	72	-4.40361	0.862109	0.987578	0.553649	31	0.372671	0.204969	23	-0.503953	0	0.638889	2.96549	-21	-33	0.627907	-33	-21.8	-33	24	62111.8	11.6667	1.01686	-33	0.385093	tRNA	dmel	283063946	bonini_head_3d_wt SRR1042536
NT_037436.4:16349918-16349990	72	-4.25681	0.861766	0.9875	0.554431	31	0.375	0.20625	23	-0.503953	0	0.638889	2.96412	-21	-33	0.638889	-33	-21	-33	24	62500	11.6667	1.01686	-33	0.38125	tRNA	dmel	283063946	bonini_head_3d_wt SRR1042537
NT_037436.4:17339910-17339981	71	-3.18098	0.857985	1	0.520522	32	0.0206186	0.158076	-33	-33	0	0	1.30661	-28.7	-0.594476	0.415842	-0.498439	-30.1	0.208118	-33	-33	-33	3.20627	-33	0.247423	tRNA	dmel	283063946	bonini_head_3d_wt SRR1042538
NT_037436.4:18618391-18618462	71	-2.78862	0.946546	0.993976	0.435059	24	0.106426	0.0281125	-33	-0.333333	0	0.56338	2.22532	-26.5	-33	0.554455	-33	-31.3	-33	29.5	184739	8	1.63661	-33	0.156627	tRNA	dmel	283063946	bonini_head_3d_wt SRR1042539
NT_037436.4:21854095-21854166	71	-0.884867	0.769683	0.96	0.632495	18	0.08	0.48	19	-33	0	0	2.06094	-28.1	-33	0.464286	-33	-15.1	-33	-33	-33	-33	-33	-33	0.64	tRNA	dmel	283063946	bonini_head_3d_wt SRR1042540
NT_037436.4:22843265-22843347	82	-5.45893	0.935879	0.994744	0.608056	26	0.166886	0.0157687	-33	-33	0	0.682927	2.31969	-29.8	-0.333333	0.666667	0.942809	-29.8	-0.108098	21.75	1314.06	5	0.79982	-33	0.064389	tRNA	dmel	283063946	bonini_head_3d_wt SRR1042541
NT_037436.4:22847726-22847797	71	-8.10947	0.969749	1	0.460686	28	0.0878136	0.730694	-33	-33	0	0	2.07194	-28	-0.803958	0.418605	-33	0	-33	-33	-33	-33	1.36752	3.19256	0.0452916	tRNA	dmel	283063946	bonini_head_3d_wt SRR1042542
NT_033777.3:5388229-5388301	72	-5.10696	0.979503	0.999034	0.463276	23	0.227909	0.277161	23	-0.424717	2897.15	0.611111	2.15648	-24.7	-33	0.495049	-33	-30.3	-33	-33	-33	-33	3.17318	-33	0.0516659	tRNA	dmel	283063946	bonini_head_3d_wt SRR1042543
NT_033777.3:6496040-6496112	72	-4.25681	0.861766	0.9875	0.554431	31	0.10625	0.3375	23	-0.503953	0	0	2.96412	-23.8	-33	0.527778	-33	-23.8	-33	24	37500	11.6667	2.89735	-33	0.38125	tRNA	dmel	283063946	bonini_head_3d_wt SRR1042544
NT_033777.3:6819895-6819967	72	-5.20894	0.745984	0.9998	0.586443	32	0.00819836	0.0169966	-33	-33	0	0.666667	3.06794	-27.2	-33	0.64	-33	-27.2	-33	-33	-33	-33	0.0516243	1.64533	0.00637101	tRNA	dmel	283063946	bonini_head_3d_wt SRR1042545
NT_033777.3:6821069-6821141	72	-5.16543	0.746125	0.9997	0.586531	32	0.0187944	0.324902	22	-0.333333	0	0.583333	3.08621	-27.3	-33	0.56	-0.245663	-27.3	-0.175461	-33	-33	-33	-33	-33	0.00657813	tRNA	dmel	283063946	bonini_head_3d_wt SRR1042546
NT_033777.3:6821790-6821862	72	-5.16543	0.746125	0.9997	0.586395	32	0.00769769	0.016695	22	0.201008	41.3719	0.666667	3.13641	-27.2	-33	0.574713	-33	-31.8	-33	-33	-33	-33	-0.106932	2.73274	0.00657813	tRNA	dmel	283063946	bonini_head_3d_wt SRR1042547
NT_033777.3:6822964-6823036	72	-5.24198	0.74593	0.9998	0.586531	32	0.0187962	0.325835	-33	-33	0	0	3.15237	-28.2	-33	0.567568	-0.245285	-28	-0.174488	-33	-33	-33	2.82576	-33	0.0063299	tRNA	dmel	283063946	bonini_head_3d_wt SRR1042548
Dsim_2L:2075469-2075539	70	-19.0883	0.885634	0.996944	0.573734	26	0.235103	0.30233	23	0.207084	8976.32	0.657143	2.53713	-30.5	-33	0.522727	1.90563	-30.5	0.712603	22.5	211803	17	-0.719539	3.20627	0.129488	tRNA	dsim	8530425	wxd1_rep1
Dsim_2L:2102706-2102778	72	-3.53558	0.838852	1	0.597943	19	0.195122	0.195122	-33	-33	0	0.555556	2.55876	-24.9	-33	0.57971	-33	-24.8	-33	-33	-33	-33	-33	-33	0.585366	tRNA	dsim	8530425	wxd1_rep1
Dsim_2L:2145612-2145683	71	-19.4033	0.825833	0.999538	0.493222	20	0.151109	0.286969	-33	-0.333333	0	0.591549	2.33708	-21	0.286722	0.533333	1.92851	-26.3	1.01794	19	48983.4	15	1.92913	3.39405	0.25647	tRNA	dsim	8530425	wxd1_rep1
Dsim_2L:2146001-2146072	71	-19.2707	0.832221	0.999073	0.487366	20	0.149745	0.276773	19	-0.361388	0	0.591549	2.39851	-21	0.286722	0.478261	1.92851	-24.9	1.07035	19	49142.3	15	1.86399	3.39405	0.255911	tRNA	dsim	8530425	wxd1_rep1
Dsim_2L:2147115-2147186	71	-18.9216	0.826569	1	0.496866	19	0.177434	0.365169	-33	-33	0	0	2.32418	-23.6	-0.61067	0.47191	-0.657208	-24.3	1.00955	-33	-33	-33	1.86118	1.89058	0.251873	tRNA	dsim	8530425	wxd1_rep1
Dsim_2L:2147341-2147412	71	-19.3482	0.818434	0.999104	0.495003	19	0.207979	0.351412	-33	-33	0	0	2.2967	-21.6	-33	0.47191	-0.655127	-22.2	0.853181	19.6667	24204.4	6	1.87105	2.22712	0.243837	tRNA	dsim	8530425	wxd1_rep1
Dsim_2L:2149674-2149745	71	-18.9735	0.829858	0.998558	0.495787	19	0.156731	0.375481	-33	-0.333333	0	0.56338	2.35104	-24.1	-33	0.519481	-0.657208	-23.8	1.03826	19.6667	25961.5	6	1.699	2.22712	0.25625	tRNA	dsim	8530425	wxd1_rep1
Dsim_2L:2168221-2168291	70	-19.3517	0.885653	0.996771	0.574106	26	0.254321	0.0793922	23	0.335899	10256.4	0.685714	2.41716	-30.5	-33	0.60241	-0.333333	-35	1.69724	22.5	325736	17	1.25313	2.22532	0.132764	tRNA	dsim	8530425	wxd1_rep1
Dsim_2L:2583560-2583662	102	-17.8747	0.791584	0.966493	0.52104	18	0.217306	0.562134	20	-0.125064	2277.16	0.607843	2.93568	-27.1	-33	0.571429	-33	-20.7	-33	20	8132.73	29	-0.279075	-33	0.125895	tRNA	dsim	8530425	wxd1_rep1
Dsim_2L:2586188-2586281	93	-17.5075	0.799954	0.996988	0.521461	18	0.294846	0.0682731	20	-0.109422	2342.7	0.580645	2.93545	-27.6	-33	0.634921	-33	-31.8	-33	20	16064.3	30	-0.495193	-33	0.128849	tRNA	dsim	8530425	wxd1_rep1
Dsim_2L:3285567-3285648	81	-16.3347	0.818384	0.999655	0.387118	19	0.0131261	0.029361	21	-0.416667	0	0.592593	2.75217	-26.2	-33	0.526316	-33	-30.6	-33	-33	-33	-33	0.875811	-33	0.132642	tRNA	dsim	8530425	wxd1_rep1
Dsim_2L:3288846-3288927	81	-13.2278	0.850657	0.998133	0.601478	24	0.0896359	0.247432	21	-0.416667	0	0	2.49533	-30.2	-33	0.571429	-0.606151	-30.4	-0.186722	-33	-33	-33	-0.429202	-33	0.268908	tRNA	dsim	8530425	wxd1_rep1
Dsim_2L:3372522-3372593	71	-12.4383	0.87212	0.995656	0.615998	18	0.0469157	0.231972	23	-0.114	6950.48	0.676056	2.22794	-26.2	-1.76383	0.556701	0.0198949	-27.9	0.963036	21.5	22589	18	1.9007	-33	0.350999	tRNA	dsim	8530425	wxd1_rep1
Dsim_2L:4527829-4527900	71	-5.89904	0.856946	0.989848	0.521483	19	0.0964467	0.472081	22	-0.334675	12690.4	0.56338	2.91368	-22.5	-33	0.449438	-33	-22.5	-33	19.6667	22842.6	25	1.17763	-33	0.360406	tRNA	dsim	8530425	wxd1_rep1
Dsim_2L:5323499-5323570	71	-22.917	0.966135	0.9997	0.435672	28	0.643507	0.118465	24	2.05781	679.915	0.619718	2.99477	-26	1.34908	0.595745	0.147187	-32.4	-0.292397	22	432.673	17	1.04349	0.244723	0.0505609	tRNA	dsim	8530425	wxd1_rep1
Dsim_2L:6897621-6897693	72	-13.43	0.816893	1	0.564417	20	0.0708074	0.136646	-33	-33	0	0.555556	2.84212	-28	-33	0.43299	-33	-30.1	-33	-33	-33	-33	1.0635	-33	0.303106	tRNA	dsim	8530425	wxd1_rep1
Dsim_2L:7799675-7799860	185	-21.7995	0.825039	0.998423	0.534225	18	0.224324	0.104279	20	-0.0176403	1576.58	0.67027	2.95629	-64.1	-33	0.625	-33	-27.4	-33	20	10810.8	30	0.173054	1.78501	0.182432	tRNA	dsim	8530425	wxd1_rep1
Dsim_2L:7955131-7955201	70	-19.3742	0.885455	0.996204	0.572307	26	0.251708	0.0808656	21	0.0180375	14047.1	0.685714	2.52724	-30.5	-33	0.54945	-33	-35	-33	22.5	323842	18	1.64533	2.2471	0.133068	tRNA	dsim	8530425	wxd1_rep1
Dsim_2L:8358980-8359052	72	-19.1764	0.946605	0.997805	0.601947	26	0.12712	0.14109	21	-33	0	0.666667	2.94363	-29.1	-33	0.675325	-33	-33.8	-33	-33	-33	-33	1.33786	2.35047	0.0682792	tRNA	dsim	8530425	wxd1_rep1
Dsim_2L:8540004-8540075	71	-22.633	0.951981	0.9997	0.475374	28	0.195441	0.472858	24	2.20307	354.889	0.535211	2.54748	-25.5	-33	0.493507	-0.544247	-25.7	-0.284562	22.5	8821.52	17	0.0589782	0.0204192	0.0418262	tRNA	dsim	8530425	wxd1_rep1
Dsim_2L:8599430-8599501	71	-22.6293	0.952062	0.9996	0.476444	28	0.195322	0.473311	24	2.24189	582.972	0.535211	2.60161	-25.5	-33	0.487179	-0.417875	-25.7	-0.285535	22.5	8415.08	17	0.039956	0.0204192	0.041898	tRNA	dsim	8530425	wxd1_rep1
Dsim_2L:8599639-8599710	71	-23.8	0.956173	0.9997	0.429273	28	0.618514	0.121364	24	1.8955	510.557	0.619718	2.99931	-26	1.08333	0.48421	-0.228567	-27.6	-0.300642	21.5	330.36	17	0.994312	0.12578	0.0502147	tRNA	dsim	8530425	wxd1_rep1
Dsim_2L:8643595-8643667	72	-18.7195	0.720996	0.999729	0.583497	18	0.494648	0.0233031	25	-33	0	0.527778	2.12577	-20.3	-33	0.531646	-33	-25.7	-33	21.75	270.966	17	0.0802437	-33	0.0590706	tRNA	dsim	8530425	wxd1_rep1
Dsim_2L:8685374-8685445	71	-22.7017	0.966106	0.9997	0.436533	28	0.644607	0.120564	24	2.2614	711.854	0.619718	2.97154	-26	1.31474	0.531915	-0.131048	-28.6	-0.293627	21.5	402.352	17	0.992168	0.244723	0.0506345	tRNA	dsim	8530425	wxd1_rep1
Dsim_2L:8744191-8744262	71	-22.5365	0.952503	0.9996	0.475921	28	0.656637	0.101959	24	1.80865	451.15	0.619718	2.96216	-26	1.46099	0.525253	-0.533963	-33.6	-0.27814	22.5	15289	20	0.960611	0.287187	0.0426588	tRNA	dsim	8530425	wxd1_rep1
Dsim_2L:8748388-8748459	71	-23.1471	0.965682	0.9997	0.435878	28	0.640708	0.121663	24	2.2472	770.511	0.619718	2.99625	-26	1.56561	0.617021	-0.103897	-30.6	-0.291722	21.5	246.564	17	0.992168	0.244723	0.0508846	tRNA	dsim	8530425	wxd1_rep1
Dsim_2L:8748746-8748817	71	-22.5659	0.96569	0.9997	0.436615	28	0.0206938	0.577927	24	2.09708	742.873	0.535211	3.00025	-25.5	-33	0.385965	-33	-17	-33	21.5	371.437	17	0.286883	0.411992	0.0503296	tRNA	dsim	8530425	wxd1_rep1
Dsim_2L:8750157-8750228	71	-22.6004	0.966391	0.9996	0.436275	28	0.645042	0.119252	24	1.84633	711.524	0.619718	3.08915	-26	1.3245	0.604167	-0.351176	-31.6	-0.291897	21.5	5197.22	20	0.992168	0.244723	0.0505491	tRNA	dsim	8530425	wxd1_rep1
Dsim_2L:8750511-8750582	71	-22.5498	0.965804	0.9997	0.436536	28	0.0203939	0.581526	24	1.96328	680.925	0.535211	3.01764	-25.5	-33	0.385965	-33	-17	-33	20.5	216.658	17	0.286883	0.411992	0.0503884	tRNA	dsim	8530425	wxd1_rep1
Dsim_2L:9285841-9285914	73	-9.211	0.840264	0.996516	0.502411	19	0.15331	0.296167	20	0.0687614	1742.16	0	2.65926	-21.2	-33	0.541176	-33	-21.7	-33	19.6667	20905.9	11	2.10171	-33	0.344948	tRNA	dsim	8530425	wxd1_rep1
Dsim_2L:14013928-14013999	71	-16.9273	0.834664	0.998984	0.495653	19	0.153885	0.340782	-33	-0.471405	0	0	2.43609	-19.1	-33	0.571429	-0.463222	-19.1	1.14169	19	27425.1	15	1.54455	3.20627	0.237176	tRNA	dsim	8530425	wxd1_rep1
Dsim_2L:14500569-14500640	71	-15.8939	0.830663	0.996636	0.548258	18	0.279226	0.164844	19	-0.267524	3364.17	0.619718	2.6524	-26.1	-33	0.489362	-33	-29.4	-33	21	50462.6	20	2.09831	-33	0.272498	tRNA	dsim	8530425	wxd1_rep1
Dsim_2L:14522714-14522784	70	-19.3655	0.88666	0.995926	0.55977	26	0.13196	0.0948393	23	0.0791411	11996.4	0.685714	2.55466	-30.5	-33	0.543478	-0.333333	-35	1.74705	21.5	51607.1	17	1.86312	2.22532	0.155953	tRNA	dsim	8530425	wxd1_rep1
Dsim_2L:14522970-14523040	70	-19.2668	0.887034	0.996369	0.560385	26	0.0885157	0.359964	23	0.317511	14071.7	0.657143	2.54953	-30.5	-33	0.484849	-33	-16.3	-33	21.5	36768	17	-0.595619	2.7704	0.155016	tRNA	dsim	8530425	wxd1_rep1
Dsim_2L:14523306-14523376	70	-19.026	0.887177	0.996818	0.560143	26	0.0886565	0.360536	23	0.193184	12957.5	0.657143	2.6173	-30.5	-33	0.553846	2.05555	-31.7	-0.0864807	21.5	25915	17	-0.595619	2.7704	0.152762	tRNA	dsim	8530425	wxd1_rep1
Dsim_2L:14535405-14535475	70	-19.3023	0.886958	0.996367	0.560419	26	0.0885559	0.3599	23	0.259497	13624	0.657143	2.52657	-30.5	-33	0.554217	2.04148	-30.5	-0.0829443	21.5	36784.7	17	-0.595619	2.7704	0.154632	tRNA	dsim	8530425	wxd1_rep1
MT:952-1020	68	-33.3632	0.885884	0.9999	0.495294	22	0.261874	0.0704929	20	-0.484849	0	0.441177	2.81433	-15	-33	0.404762	-0.539851	-17.3	1.71987	-33	-33	-33	-0.412498	-33	0.0815867	tRNA	zebrafish	1462962046	all_zebrafish (SRR1554490-SRR1554494)
MT:1973-2043	70	-23.8948	0.824029	1	0.494828	18	0.0930752	0.18522	-33	-33	0	0.457143	1.90348	-12.2	-33	0.529412	-0.357749	-19.8	-0.144161	-33	-33	-33	1.96199	1.90976	0.228407	tRNA	zebrafish	1462962046	all_zebrafish (SRR1554490-SRR1554494)
MT:3727-3803	76	-9.49154	0.926225	0.990683	0.414941	22	0.100932	0.753106	24.3333	-0.503953	0	0.631579	2.18552	-19.2	-1.53439	0.596154	-0.51511	-23.6	1.70659	20	21739.1	28	1.35088	1.04874	0.38354	tRNA	zebrafish	1462962046	all_zebrafish (SRR1554490-SRR1554494)
MT:2-69	67	-13.6086	0.860002	1	0.338738	20	0.301857	0.299714	-33	-33	0	0.41791	2.71164	NA	-33	0.511628	-33	0	-33	-33	-33	-33	1.04696	0.826856	0.0622857	tRNA	mouse	3849069296	(SRR13848060-SRR13848062, SRR24821465,SRR24821466,SRR24821469,SRR24821470)
MT:1026-1094	68	-25.1385	0.908853	0.998004	0.462763	20	0.177046	0.599401	25	1.19125	543.658	0.529412	2.2916	-13.3	-33	0.490566	-33	-15.8	-33	22.5	668.431	6	1.58859	2.18168	0.0169871	tRNA	mouse	3849069296	(SRR13848060-SRR13848062, SRR24821465,SRR24821466,SRR24821469,SRR24821470)
MT:2677-2751	74	-19.1478	0.924248	0.998602	0.44492	23	0.173058	0.210306	26	-0.438171	742.635	0.594595	2.30579	-17.3	-33	0.534654	-33	-20.3	-33	22.5	34821.3	27	1.75231	0.133649	0.087631	tRNA	mouse	3849069296	(SRR13848060-SRR13848062, SRR24821465,SRR24821466,SRR24821469,SRR24821470)
MT:3707-3775	68	-16.3253	0.799432	0.629905	0.381124	18	0.372531	0.309438	19	0.463637	256348	0.617647	3.10652	-11	-33	0.6	-0.375986	-18.6	0.862279	21	263401	30	1.70138	1.64533	0.0754039	tRNA	mouse	3849069296	(SRR13848060-SRR13848062, SRR24821465,SRR24821466,SRR24821469,SRR24821470)
MT:3773-3843	70	-17.7014	0.863549	0.893895	0.393054	18	0.351032	0.371145	31	0.16349	27993.6	0.485714	2.56309	NA	-33	0.470588	-0.441968	-17.4	0.751761	21.5	539378	12	2.27709	2.22656	0.054112	tRNA	mouse	3849069296	(SRR13848060-SRR13848062, SRR24821465,SRR24821466,SRR24821469,SRR24821470)
[truncated: 11 more rows]

## Sheet: cross validation data
locus	locus_length	log_shap_p	auc	strand_bias	perc_GC	ave_size	perc_first_nucT	perc_A10	highest_si_col	si_dicerz	num_si_dicer_reads	hp_perc_paired	hp_phasedz	hp_mfe	hp_dicerz	mi_perc_paired	mirna_dicerz	mirna_mfe	mirna_overlapz	pingpong_col	max_pi_count	max_piz_overlap	pi_phasedz	pi_phased26z	unique_read_bias	type	species	libsize	X
[truncated: 73 more rows]

[truncated: 1 more sheets: cross validation accuracy]
